# Supplementary material for: Magnesium salt promoted tandem nucleophilic addition–Oppenauer oxidation of aldehydes with organozinc reagents
Source: Royal Society of Chemistry journal article supplement (doi:10.1039/c6ob01668e), 2016-01-01

## Supporting Information

# Magnesium Salt Promoted Tandem Nucleophilic Addition-Oppenauer Oxidation of Aldehydes with Organozinc Reagents \*\*

Ying Fu,<sup>a,\*</sup> Xingling Zhao,<sup>a</sup> Helmut Hügel,<sup>b</sup> Zhengyin Du,<sup>a</sup> Danfeng Huang<sup>a</sup> and Yulai Hu<sup>a</sup>

<sup>a</sup> College of Chemistry and Chemical Engineering, Northwest Normal University, Lanzhou, 730070, China.

<sup>b</sup> Health Innovations Research Institute and School of Applied Sciences, RMIT University, Melbourne, 3001, Australia

*fuying@iccas.ac.cn*

## Table of Contents:

| Contents                                                             | Page     |
|----------------------------------------------------------------------|----------|
| General                                                              | S2       |
| Compound Characterization Data                                       | S3-S22   |
| <sup>1</sup> H NMR & <sup>13</sup> C NMR spectra for title compounds | S23-S104 |

## General Experimental Section:

**Analytic methods.** All the reactions were carried out under argon or nitrogen atmosphere.  $^1\text{H}$  NMR (400 MHz), and  $^{13}\text{C}$  NMR (100 MHz) were recorded on Bruker AV400 NMR spectrometer with  $\text{CDCl}_3$  as solvent. Chemical shifts of  $^1\text{H}$  and  $^{13}\text{C}$  NMR spectra are reported in parts per million (ppm) with TMS as an internal standard. Column chromatography was performed on silica gel 300 - 400 mesh. Analytical thin layer chromatography (TLC) was performed on pre-coated, glass-backed silica gel plates. Visualization of the developed chromatogram was performed by UV absorbance (254 nm). GC-MS experiments were performed with an Agilent 6890N GC system equipped with a 5973N mass-selective detector.

**Compound characterization:** Tabulated  $^1\text{H}$  and  $^{13}\text{C}$  NMR data and copies of  $^1\text{H}$  and  $^{13}\text{C}$  spectra are given for all ketone products. For new compounds, **3j**, **9b~9e**, **9g**, HRMS data is provided. The other compounds have previously been reported in the literature. Spectral data obtained herein were in agreement with literature data.

### General Procedure A1: Preparation of polyfunctional arylzinc reagents by using magnesium in the presence of LiCl and $\text{ZnCl}_2$ .

A dry and argon-flushed Schlenk-flask, equipped with a magnetic stirrer and a septum, was charged with magnesium turnings (0.17g, 7 mmol).  $\text{ZnCl}_2$  (0.54g, 4 mmol), and LiCl (0.21g, 5 mmol) was added and the magnesium was activated with  $i\text{Bu}_2\text{AlH}$  (0.4 mL, 0.04 mmol). After 5 min of stirring the aryl bromide (5.0 mmol) was added dropwise at room temperature and was stirred for 3 h.

### General Procedure A2: preparation of functionalized organozinc reagents by Mg/I exchange reaction

Preparation of the reagent  $i\text{PrMgCl}\cdot\text{LiCl}$ : Magnesium turnings (0.17g, 7.0 mmol) and anhydrous LiCl (0.21g, 5.0 mmol) were placed in an Ar-flushed flask, and THF (5 mL) was added. A solution of  $i\text{PrCl}$  (5.0 mmol) in THF (5 mL) was slowly added at room temperature. The reaction started within a few minutes. After the addition, the reaction mixture was stirred for 12 h at room temperature.

A dry and argon-flushed 10-mL flask equipped with a magnetic stirrer and a septum was charged with  $i\text{PrMgCl}\cdot\text{LiCl}$  (5 mmol). The reaction mixture was cooled to  $-40\text{ }^\circ\text{C}$ , and aryl halide (5.0 mmol) was added in one portion. The reaction temperature was increased to  $-10\text{ }^\circ\text{C}$ , and the I/Mg exchange was complete after 15 min (checked by GC analysis of reaction aliquots, the conversion was more than 98%).  $\text{ZnCl}_2$  (4 mmol) was then added and the reaction mixture was stirred for additional 0.5h.

## General Procedure B: Reaction of Organozinc Reagents with aldehydes:

Diorganozinc (4.0 mmol) or organozinc reagent prepared above was added slowly to a solution of substrate aldehyde (2.0 mmol) and pivaldehyde (0.34g, 4.0 mmol) in 10 ml THF at RT. After the reaction mixture was stirred at room temperature for 2 hours, the reaction mixture was quenched by aqueous  $\text{NH}_4\text{Cl}$  (10 mL). 10 mL of ethyl acetate was then added and the organic phase was separated, washed with 10 mL of water and then with 10 ml of brine. The water phase was extracted with ethyl acetate (2×10 mL). The organic phase was combined, dried ( $\text{Na}_2\text{SO}_4$ ) and concentrated under reduced pressure. The ketone was obtained by column chromatography on silica gel using petroleum/ethyl acetate as an eluent. All products were characterized by  $^1\text{H}$  NMR, and  $^{13}\text{C}$  NMR.

### 3a: Ethyl 4-methoxyphenyl ketone<sup>[1]</sup>

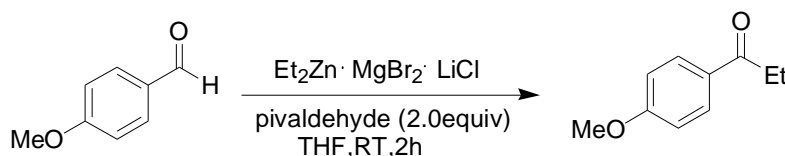

Diethylzinc (4.0 ml, 4.0 mmol, 1.0 M in toluene) was added slowly to a THF solution (10 ml) containing  $\text{MgBr}_2$  (0.74g, 4.0 mmol), 4-methoxybenzaldehyde (0.27 g, 2 mmol), pivaldehyde (0.34g, 4mmol) under ice-water bath. After the reaction mixture was stirred at room temperature for 2 hours, the reaction mixture was quenched by aqueous  $\text{NH}_4\text{Cl}$  (10 mL). 10 mL of ethyl acetate was then added and the organic phase was separated, washed with 10 mL of water and then with 10 ml of brine. The water phase was extracted with ethyl acetate (2×10 mL). The organic phase was combined, dried ( $\text{Na}_2\text{SO}_4$ ) and concentrated under reduced pressure. Ethyl 4-methoxyphenyl ketone **3a** was obtained by column chromatography on silica gel using petroleum/ethyl acetate as an eluent. 0.28 g, 84% yield.  $^1\text{H}$  NMR (400 MHz,  $\text{CDCl}_3$ )  $\delta$  (ppm): 1.21 (t,  $J = 7.2$  Hz, 3H), 2.94 (q,  $J = 7.2$  Hz, 2H), 3.87 (s, 3H), 6.93 (d,  $J = 8.8$  Hz, 2H), 7.95 (d,  $J = 8.8$  Hz, 2H);  $^{13}\text{C}$  NMR (100 MHz,  $\text{CDCl}_3$ )  $\delta$  (ppm): 8.4, 31.4, 55.4, 113.6, 130.0, 130.2, 163.3, 199.5.

### 3b: Methyl 4-methoxyphenyl ketone<sup>[1,2]</sup>

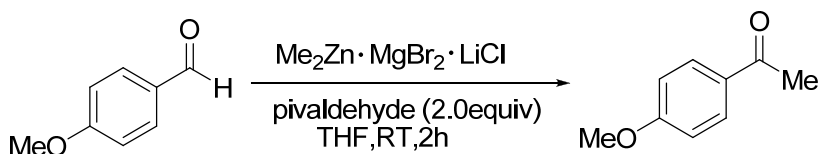

Dimethylzinc (4.0 ml, 4.0 mmol, 1.0 M in toluene) was added slowly to a THF solution (10 ml) containing  $\text{MgBr}_2$  (0.74g, 4.0 mmol), 4-methoxybenzaldehyde (0.27 g, 2 mmol), pivaldehyde (0.34g, 4mmol) under ice-water bath. After the reaction mixture was stirred at room temperature for 2 hours, the reaction mixture was quenched by aqueous  $\text{NH}_4\text{Cl}$  (10 mL). 10 mL of ethyl acetate was then added and the organic phase was separated, washed with 10 mL of water and then with 10 ml of brine. The

water phase was extracted with ethyl acetate (2×10 mL). The organic phase was combined, dried ( $\text{Na}_2\text{SO}_4$ ) and concentrated under reduced pressure. Methyl 4-methoxyphenyl ketone **3b** was obtained by column chromatography on silica gel using petroleum/ethyl acetate as an eluent. White solid (0.22 g, 72% yield).  $^1\text{H}$  NMR (400 MHz,  $\text{CDCl}_3$ )  $\delta$  (ppm): 2.56 (s, 3H), 3.88 (s, 3H), 6.94 (d,  $J = 8.0$  Hz, 2H), 7.94 (d,  $J = 8.0$  Hz, 2H);  $^{13}\text{C}$  NMR (150 MHz,  $\text{CDCl}_3$ )  $\delta$  (ppm): 26.3, 55.4, 113.7, 130.3, 130.6, 163.5, 196.7.

### 3c: Methyl 4-chlorophenyl ketone<sup>[2]</sup>

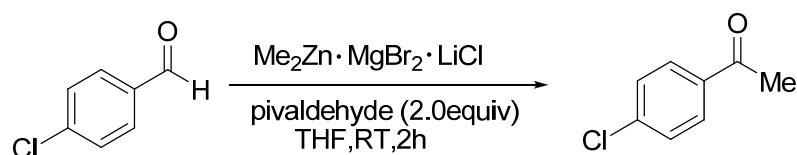

Dimethylzinc (4.0 ml, 4.0 mmol, 1.0 M in toluene) was added slowly to a THF solution (10 ml) containing  $\text{MgBr}_2$  (0.74g, 4.0 mmol), 4-chlorobenzaldehyde (0.28 g, 2 mmol), pivaldehyde (0.34g, 4mmol) under ice-water bath. After the reaction mixture was stirred at room temperature for 2 hours, the reaction mixture was quenched by aqueous  $\text{NH}_4\text{Cl}$  (10 mL). 10 mL of ethyl acetate was then added and the organic phase was separated, washed with 10 mL of water and then with 10 ml of brine. The water phase was extracted with ethyl acetate (2×10 mL). The organic phase was combined, dried ( $\text{Na}_2\text{SO}_4$ ) and concentrated under reduced pressure. Methyl 4-chlorophenyl ketone **3c** was obtained by column chromatography on silica gel using petroleum/ethyl acetate as an eluent. White solid (0.24 g, 77% yield).  $^1\text{H}$  NMR (600 MHz,  $\text{CDCl}_3$ )  $\delta$  (ppm): 2.59 (s, 3H), 7.44 (d,  $J = 8.5$  Hz, 2H), 7.89 (d,  $J = 8.5$  Hz, 2H);  $^{13}\text{C}$  NMR (150 MHz,  $\text{CDCl}_3$ )  $\delta$  (ppm): 26.5, 128.9, 129.7, 135.4, 139.5, 196.8.

### 3d: Methyl 4-bromophenyl ketone<sup>[2]</sup>

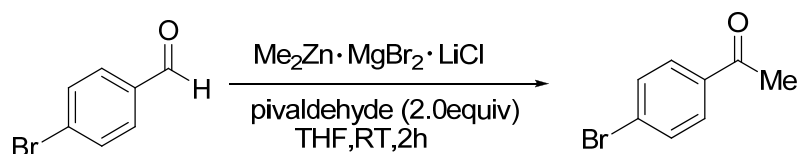

Dimethylzinc (4.0 ml, 4.0 mmol, 1.0 M in toluene) was added slowly to a THF solution (10 ml) containing  $\text{MgBr}_2$  (0.74g, 4.0 mmol), 4-bromobenzaldehyde (0.37 g, 2 mmol), pivaldehyde (0.34g, 4mmol) under ice-water bath. After the reaction mixture was stirred at room temperature for 2 hours, the reaction mixture was quenched by aqueous  $\text{NH}_4\text{Cl}$  (10 mL). 10 mL of ethyl acetate was then added and the organic phase was separated, washed with 10 mL of water and then with 10 ml of brine. The water phase was extracted with ethyl acetate (2×10 mL). The organic phase was combined, dried ( $\text{Na}_2\text{SO}_4$ ) and concentrated under reduced pressure. Methyl 4-bromophenyl ketone **3d** was obtained by column chromatography on silica gel using petroleum/ethyl acetate as an eluent. White solid (0.29 g, 74% yield).  $^1\text{H}$  NMR (600 MHz,  $\text{CDCl}_3$ )  $\delta$  (ppm): 2.59 (s, 3H), 7.61 (d,  $J = 8.4$  Hz, 2H), 7.82 (d,  $J = 8.4$  Hz, 2H);  $^{13}\text{C}$  NMR (150 MHz,  $\text{CDCl}_3$ )  $\delta$  (ppm): 26.5, 128.3, 129.8, 131.8, 135.8, 196.9.

**3e: 1-Benzo[1,3]dioxol-5-yl-propan-1-one** <sup>[3]</sup>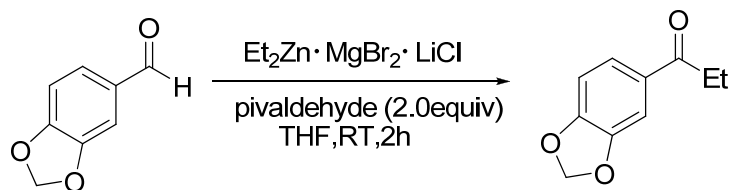

Diethylzinc (4.0 ml, 4.0 mmol, 1.0 M in toluene) was added slowly to a THF solution (10 ml) containing MgBr<sub>2</sub> (0.74g, 4.0 mmol), piperonal (2.0 mmol, 0.30 g), pivaldehyde (0.34g, 4mmol) under ice-water bath. After the reaction mixture was stirred at room temperature for 2 hours, the reaction mixture was quenched by aqueous NH<sub>4</sub>Cl (10 mL). 10 mL of ethyl acetate was then added and the organic phase was separated, washed with 10 mL of water and then with 10 ml of brine. The water phase was extracted with ethyl acetate (2×10 mL). The organic phase was combined, dried (Na<sub>2</sub>SO<sub>4</sub>) and concentrated under reduced pressure. 1-(4-Methoxyphenyl)propan-1-one **3e** was obtained by column chromatography on silica gel using petroleum/ethyl acetate as an eluent. 0.28g, 80% yield. <sup>1</sup>H NMR (400 MHz, CDCl<sub>3</sub>) δ (ppm): 1.22 (dd, *J* = 17.5, 10.3 Hz, 3H), 2.92 (dd, *J* = 14.4, 7.2 Hz, 2H), 6.05 (d, *J* = 16.7 Hz, 2H), 6.84 (d, *J* = 8.1 Hz, 1H), 7.44 (s, 1H), 7.56 (d, *J* = 6.7 Hz, 1H). <sup>13</sup>C NMR (101 MHz, CDCl<sub>3</sub>) δ (ppm): 8.4, 31.4, 101.7, 107.7, 107.8, 124.0, 131.7, 148.0, 151.4, 198.8.

**3f: 1-(3,4,5-Trimethoxy-phenyl)-propan-1-one** <sup>[1]</sup>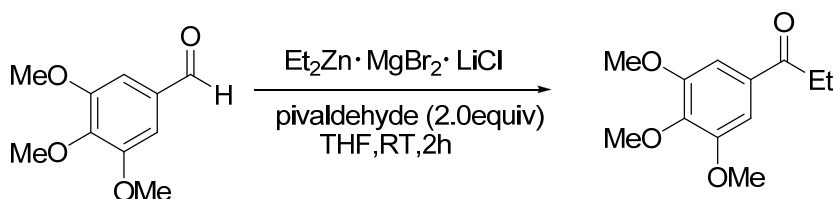

Diethylzinc (4.0 ml, 4.0 mmol, 1.0 M in toluene) was added slowly to a THF solution (10 ml) containing MgBr<sub>2</sub> (0.74g, 4.0 mmol), 3,4,5-trimethoxybenzaldehyde (2.0 mmol, 0.39 g), pivaldehyde (0.34g, 4mmol) under ice-water bath. After the reaction mixture was stirred at room temperature for 2 hours, the reaction mixture was quenched by aqueous NH<sub>4</sub>Cl (10 mL). 10 mL of ethyl acetate was then added and the organic phase was separated, washed with 10 mL of water and then with 10 ml of brine. The water phase was extracted with ethyl acetate (2×10 mL). The organic phase was combined, dried (Na<sub>2</sub>SO<sub>4</sub>) and concentrated under reduced pressure. 1-(3,4,5-trimethoxyphenyl)propan-1-one **3f** was obtained by column chromatography on silica gel using petroleum/ethyl acetate as an eluent. 0.35g, 78% yield. <sup>1</sup>H NMR (400 MHz, CDCl<sub>3</sub>) δ (ppm): 1.34-1.13 (m, 3H), 2.98 (d, *J* = 7.1 Hz, 2H), 3.92 (s, 9H), 7.25 (d, *J* = 11.4 Hz, 2H). <sup>13</sup>C NMR (101 MHz, CDCl<sub>3</sub>) δ (ppm): 8.4, 31.5, 56.3, 60.8, 105.6, 132.3, 142.4, 153.1, 199.6.

**3g: 1-Thiophen-2-yl-propan-1-one** <sup>[4]</sup>

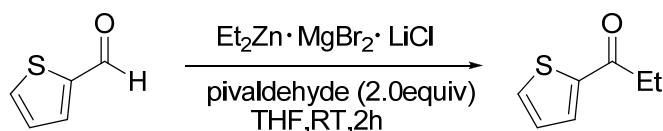

Diethylzinc (4.0 ml, 4.0 mmol, 1.0 M in toluene) was added slowly to a THF solution (10 ml) containing MgBr<sub>2</sub> (0.74g, 4.0 mmol), 3,4,5-trimethoxybenzaldehyde (2.0 mmol, 0.39 g), pivaldehyde (0.34g, 4mmol) under ice-water bath. After the reaction mixture was stirred at room temperature for 2 hours, the reaction mixture was quenched by aqueous NH<sub>4</sub>Cl (10 mL). 10 mL of ethyl acetate was then added and the organic phase was separated, washed with 10 mL of water and then with 10 ml of brine. The water phase was extracted with ethyl acetate (2×10 mL). The organic phase was combined, dried (Na<sub>2</sub>SO<sub>4</sub>) and concentrated under reduced pressure. 1-Thiophen-2-yl-propan-1-one **3g** was obtained by column chromatography on silica gel using petroleum/ethyl acetate as an eluent. 1-(4-Methoxyphenyl)propan-1-one was obtained by column chromatography on silica gel using petroleum/ethyl acetate as an eluent. 0.17g, 63% yield. <sup>1</sup>H NMR (400 MHz, CDCl<sub>3</sub>) δ (ppm): 1.22 (dd, *J* = 7.3, 4.8 Hz, 3H), 2.93 (dt, *J* = 7.3, 6.1 Hz, 2H), 7.11 (t, *J* = 4.3 Hz, 1H), 7.60 (d, *J* = 4.9 Hz, 1H), 7.72-7.68 (m, 1H). <sup>13</sup>C NMR (151 MHz, CDCl<sub>3</sub>) δ (ppm): 8.5, 32.5, 127.9, 131.5, 133.1, 144.1, 193.8.

**3h: 4-methoxybenzophenone** <sup>[5]</sup>

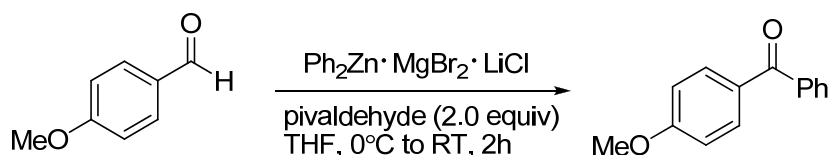

Diphenylzinc (4.0 ml, 4.0 mmol, 1.0 M in toluene) was added slowly to a THF solution (10 ml) containing MgBr<sub>2</sub> (0.74g, 4.0 mmol), 4-methoxybenzaldehyde (2.0 mmol, 0.27 g), pivaldehyde (0.34g, 4mmol) under ice-water bath. After the reaction mixture was stirred at room temperature for 2 hours, the reaction mixture was quenched by aqueous NH<sub>4</sub>Cl (10 mL). 10 mL of ethyl acetate was then added and the organic phase was separated, washed with 10 mL of water and then with 10 ml of brine. The water phase was extracted with ethyl acetate (2×10 mL). The organic phase was combined, dried (Na<sub>2</sub>SO<sub>4</sub>) and concentrated under reduced pressure. 4-Methoxyphenone **3h** was obtained by column chromatography on silica gel using petroleum/ethyl acetate as an eluent. 0.35g, 82% yield. <sup>1</sup>H NMR (400 MHz, CDCl<sub>3</sub>) δ (ppm): 3.89 (s, 3H), 6.96 (d, *J* = 8.0 Hz, 2H), 7.48 (t, *J* = 7.2 Hz, 2H), 7.57 (t, *J* = 7.2 Hz, 1H), 7.76 (d, *J* = 8.0 Hz, 2H), 7.83 (d, *J* = 8.0 Hz, 2H); <sup>13</sup>C NMR (100 MHz, CDCl<sub>3</sub>) δ (ppm): 55.5, 113.5, 128.1, 129.7, 130.1, 131.8, 132.5, 138.2, 163.2, 195.5.

**3i: 4-Dimethylaminobenzophenone** <sup>[6]</sup>

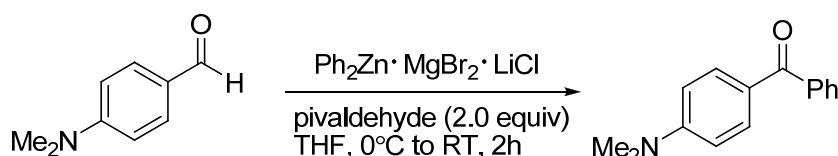

Diphenylzinc (4.0 ml, 4.0 mmol, 1.0 M in toluene) was added slowly to a THF solution (10 ml) containing  $\text{MgBr}_2$  (0.74g, 4.0 mmol), 4-dimethylaminobenzaldehyde (2.0 mmol, 0.30 g), pivaldehyde (0.34g, 4mmol) under ice-water bath. After the reaction mixture was stirred at room temperature for 2 hours, the reaction mixture was quenched by aqueous  $\text{NH}_4\text{Cl}$  (10 mL). 10 mL of ethyl acetate was then added and the organic phase was separated, washed with 10 mL of water and then with 10 ml of brine. The water phase was extracted with ethyl acetate ( $2 \times 10$  mL). The organic phase was combined, dried ( $\text{Na}_2\text{SO}_4$ ) and concentrated under reduced pressure. The ketone 4-dimethylaminobenzophenone **3i** was obtained by column chromatography on silica gel using petroleum/ethyl acetate as an eluent. 0.31 g, 71% yield.  $^1\text{H}$  NMR (400 MHz,  $\text{CDCl}_3$ )  $\delta$  (ppm): 3.08 (s, 6H), 6.69 (d,  $J = 8.6$  Hz, 2H), 7.46 (d,  $J = 7.3$  Hz, 2H), 7.53 (s, 1H), 7.73 (d,  $J = 7.5$  Hz, 2H), 7.81 (d,  $J = 8.5$  Hz, 2H).  $^{13}\text{C}$  NMR (151 MHz,  $\text{CDCl}_3$ )  $\delta$  (ppm): 39.9, 110.4, 139.2, 127.4, 129.3, 127.9, 131.0, 132.6, 153.2, 190.2.

### 3j: 3-methoxy-4-(tert-butyl) benzophenone

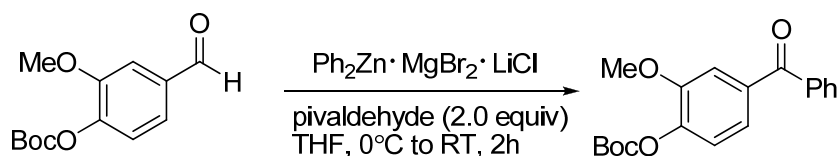

Diphenylzinc (4.0 ml, 4.0 mmol, 1.0 M in toluene) was added slowly to a THF solution (10 ml) containing  $\text{MgBr}_2$  (0.74g, 4.0 mmol), tert-butyl 4-formyl-2-methoxyphenyl carbonate (2.0 mmol, 0.52 g), pivaldehyde (0.34g, 4mmol) under ice-water bath. After the reaction mixture was stirred at room temperature for 2 hours, the reaction mixture was quenched by aqueous  $\text{NH}_4\text{Cl}$  (10 mL). 10 mL of ethyl acetate was then added and the organic phase was separated, washed with 10 mL of water and then with 10 ml of brine. The water phase was extracted with ethyl acetate ( $2 \times 10$  mL). The organic phase was combined, dried ( $\text{Na}_2\text{SO}_4$ ) and concentrated under reduced pressure. The ketone **3j** The ketone was obtained by column chromatography on silica gel using petroleum/ethyl acetate as an eluent. 0.40 g, 62% yield.  $^1\text{H}$  NMR (400 MHz,  $\text{CDCl}_3$ )  $\delta$  (ppm): 1.57 (s, 9H), 3.92 (s, 3H), 7.22 (s, 1H), 7.34 (d,  $J = 7.1$  Hz, 1H), 7.50 (d,  $J = 10.5$  Hz, 3H), 7.59 (d,  $J = 7.2$  Hz, 1H), 7.80 (d,  $J = 7.1$  Hz, 2H);  $^{13}\text{C}$  NMR (101 MHz,  $\text{CDCl}_3$ )  $\delta$  (ppm): 29.6, 56.1, 83.9, 113.5, 122.0, 123.7, 128.2, 129.9, 132.4, 136.0, 137.5, 143.6, 151.1, 151.6, 152.2, 195.5. HRMS-ESI: calcd for  $\text{C}_{19}\text{H}_{20}\text{NaO}_5$   $[\text{M} + \text{Na}]^+$ : 351.1208. Found: 351.1209.

### 3k: 4-Nitrobenzophenone <sup>[7]</sup>

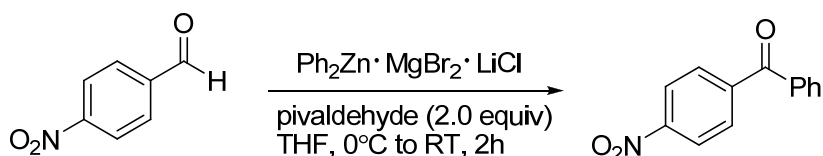

Diphenylzinc (4.0 ml, 4.0 mmol, 1.0 M in toluene) was added slowly to a THF solution (10 ml) containing  $\text{MgBr}_2$  (0.74g, 4.0 mmol), 4-nitrobenzaldehyde (2.0 mmol, 0.30 g), pivaldehyde (0.34g,

4mmol) under ice-water bath. After the reaction mixture was stirred at room temperature for 2 hours, the reaction mixture was quenched by aqueous  $\text{NH}_4\text{Cl}$  (10 mL). 10 mL of ethyl acetate was then added and the organic phase was separated, washed with 10 mL of water and then with 10 mL of brine. The water phase was extracted with ethyl acetate ( $2 \times 10$  mL). The organic phase was combined, dried ( $\text{Na}_2\text{SO}_4$ ) and concentrated under reduced pressure. The ketone **3k** was obtained by column chromatography on silica gel using petroleum/ethyl acetate as an eluent, 0.33 g, 72% yield.  $^1\text{H}$  NMR (400 MHz,  $\text{CDCl}_3$ )  $\delta$  (ppm): 7.53 (t,  $J = 8.0$  Hz, 2H), 7.66 (t,  $J = 7.6$  Hz, 1H), 7.80 (d,  $J = 7.2$  Hz, 2H), 7.94 (dt,  $J = 8.8, 2.0$  Hz, 2H), 8.34 (dt,  $J = 8.8, 2.0$  Hz, 2H);  $^{13}\text{C}$  NMR (100 MHz,  $\text{CDCl}_3$ )  $\delta$  (ppm): 123.5, 128.6, 130.0, 130.6, 133.4, 136.2, 142.8, 149.8, 194.7.

### **3l: furan-2-yl(phenyl)methanone**<sup>[7]</sup>

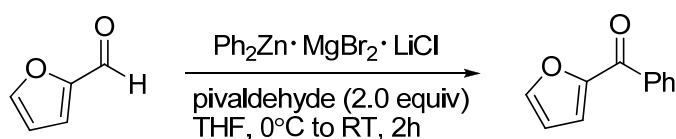

Diphenylzinc (4.0 mL, 4.0 mmol, 1.0 M in toluene) was added slowly to a THF solution (10 mL) containing  $\text{MgBr}_2$  (0.74g, 4.0 mmol), furfural (2.0 mmol, 0.19 g), pivaldehyde (0.34g, 4mmol) under ice-water bath. After the reaction mixture was stirred at room temperature for 2 hours, the reaction mixture was quenched by aqueous  $\text{NH}_4\text{Cl}$  (10 mL). 10 mL of ethyl acetate was then added and the organic phase was separated, washed with 10 mL of water and then with 10 mL of brine. The water phase was extracted with ethyl acetate ( $2 \times 10$  mL). The organic phase was combined, dried ( $\text{Na}_2\text{SO}_4$ ) and concentrated under reduced pressure. The ketone **3l** was obtained by column chromatography on silica gel using petroleum/ethyl acetate as an eluent. Oil, 0.19 g, 54% yield.  $^1\text{H}$  NMR (400 MHz,  $\text{CDCl}_3$ )  $\delta$  (ppm): 6.60 (q,  $J = 2.0$  Hz, 1H), 7.24 (dd,  $J = 3.2, 0.8$  Hz, 1H), 7.50 (t,  $J = 7.2$  Hz, 2H), 7.60 (tt,  $J = 7.2, 0.8$  Hz, 1H), 7.715-7.717(m, 1H), 7.94-7.99(dd,  $J = 7.6, 1.2$  Hz, 2H);  $^{13}\text{C}$  NMR (100 MHz,  $\text{CDCl}_3$ )  $\delta$  (ppm): 112.1, 120.5, 128.3, 129.2, 132.5, 137.2, 147.0, 152.2, 182.5.

### **3m: phenyl(thiophen-3-yl)methanone**<sup>[5]</sup>

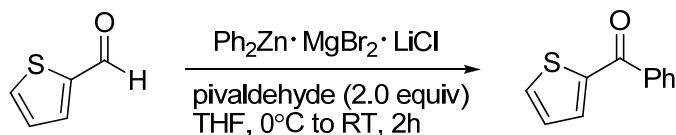

Diphenylzinc (4.0 mL, 4.0 mmol, 1.0 M in toluene) was added slowly to a THF solution (10 mL) containing  $\text{MgBr}_2$  (0.74g, 4.0 mmol), 2-thiophenecarbaldehyde (2.0 mmol, 0.22 g), pivaldehyde (0.34g, 4mmol) under ice-water bath. After the reaction mixture was stirred at room temperature for 2 hours, the reaction mixture was quenched by aqueous  $\text{NH}_4\text{Cl}$  (10 mL). 10 mL of ethyl acetate was then added and the organic phase was separated, washed with 10 mL of water and then with 10 mL of brine. The water phase was extracted with ethyl acetate ( $2 \times 10$  mL). The organic phase was combined, dried ( $\text{Na}_2\text{SO}_4$ ) and concentrated under reduced pressure. The ketone **3m** was obtained by column

chromatography on silica gel using petroleum/ethyl acetate as an eluent. Oil, 0.28 g, 75% yield.  $^1\text{H}$  NMR (400 MHz,  $\text{CDCl}_3$ )  $\delta$  (ppm): 7.39 (dd,  $J = 4.8, 3.2$  Hz, 1H), 7.49 (t,  $J = 7.6$  Hz, 2H), 7.58 (dt,  $J = 7.6, 2.4$  Hz, 1H), 7.61 (dd,  $J = 4.8, 0.8$  Hz, 1H), 7.85 (dt,  $J = 8.0, 1.6$  Hz, 2H), 7.94 (dd,  $J = 3.6, 1.2$  Hz, 1H);  $^{13}\text{C}$  NMR (100 MHz,  $\text{CDCl}_3$ )  $\delta$  (ppm): 126.1, 128.3, 128.5, 128.6, 129.3, 132.2, 132.3, 133.9, 138.5, 141.2, 189.9.

**3n: phenyl(pyridin-3-yl)methanone**<sup>[8]</sup>

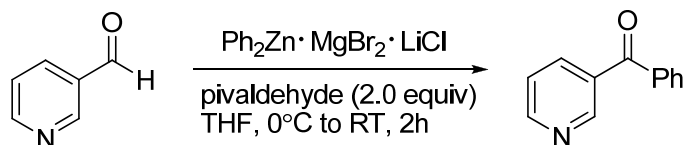

Diphenylzinc (4.0 ml, 4.0 mmol, 1.0 M in toluene) was added slowly to a THF solution (10 ml) containing  $\text{MgBr}_2$  (0.74g, 4.0 mmol), 3-pyridinecarboxaldehyde (2.0 mmol, 0.21 g), pivaldehyde (0.34g, 4mmol) under ice-water bath. After the reaction mixture was stirred at room temperature for 2 hours, the reaction mixture was quenched by aqueous  $\text{NH}_4\text{Cl}$  (10 mL). 10 mL of ethyl acetate was then added and the organic phase was separated, washed with 10 mL of water and then with 10 ml of brine. The water phase was extracted with ethyl acetate (2×10 mL). The organic phase was combined, dried ( $\text{Na}_2\text{SO}_4$ ) and concentrated under reduced pressure. The ketone **3n** was obtained by column chromatography on silica gel using petroleum/ethyl acetate as an eluent. 0.27 g, 74% yield.  $^1\text{H}$  NMR (600 MHz,  $\text{CDCl}_3$ )  $\delta$  (ppm): 7.47 (dd,  $J = 7.3, 5.3$  Hz, 1H), 7.52 (t,  $J = 7.4$  Hz, 2H), 7.64 (t,  $J = 7.3$  Hz, 1H), 7.82 (d,  $J = 7.7$  Hz, 2H), 8.17-8.11 (m, 1H), 8.82 (d,  $J = 4.8$  Hz, 1H), 9.00 (s, 1H).  $^{13}\text{C}$  NMR (151 MHz,  $\text{CDCl}_3$ )  $\delta$  (ppm): 120.2, 123.4, 128.6, 129.5, 130.0, 136.6, 137.2, 150.8, 152.6, 194.8.

**3o: 3-(4-Methoxy-phenyl)-3-oxo-propionic acid ethyl ester**<sup>[9]</sup>

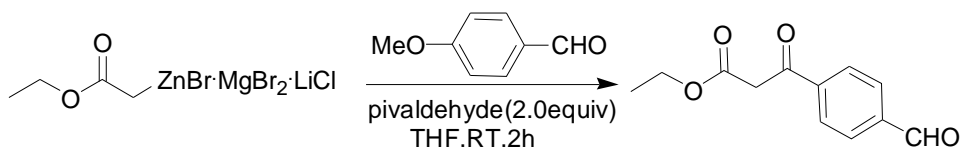

Anhydrous  $\text{LiCl}$  (0.21g, 5 mmol) was placed in an Ar-flushed flask and dried for 20 min at 150–170°C under high vacuum (1 mbar). Zinc powder (0.46g, 7 mmol) was added under Ar and the heterogeneous mixture of Zn and  $\text{LiCl}$  was dried again for 10–20 min at 150–170°C under high vacuum (1 mbar). The reaction flask was evacuated and refilled with argon three times. THF (5 mL) was added and the Zn was activated with  $\text{BrCH}_2\text{CH}_2\text{Br}$  (5 mol%) and  $\text{Me}_3\text{SiCl}$  (1 mol%). Ethyl-2-bromoacetate (0.84g, 5 mmol),  $\text{MgBr}_2$  (0.74g, 4mmol), 4-methoxybenzaldehyde (2.0 mmol, 0.27 g), pivaldehyde (0.30g, 4.0 mmol,) were then added neat at room temperature. After the reaction mixture was stirred at room temperature for 2 hours, the reaction mixture was quenched by aqueous  $\text{NH}_4\text{Cl}$  (10 mL). 10 mL of ethyl acetate was then added and the organic phase was separated, washed with 10 mL of water and then with 10 ml of brine. The water phase was extracted with ethyl acetate (2×10 mL). The organic phase was combined, dried ( $\text{Na}_2\text{SO}_4$ ) and concentrated under reduced pressure. The ketone was

obtained by column chromatography on silica gel using petroleum/ethyl acetate as an eluent. 0.34 g, 76% yield.  $^1\text{H}$  NMR (600 MHz,  $\text{CDCl}_3$ )  $\delta$  (ppm): 1.25 (dd,  $J = 7.8, 6.3$  Hz, 3H), 3.88 (s, 3H), 3.94 (s, 2H), 4.21 (d,  $J = 7.2$  Hz, 2H), 6.95 (d,  $J = 8.5$  Hz, 2H), 7.93 (d,  $J = 8.5$  Hz, 2H).  $^{13}\text{C}$  NMR (151 MHz,  $\text{CDCl}_3$ )  $\delta$  (ppm): 14.1, 45.8, 55.5, 61.4, 113.9, 129.1, 130.9, 163.9, 167.9, 190.9.

**3p: Acetylferrocene** <sup>[10]</sup>

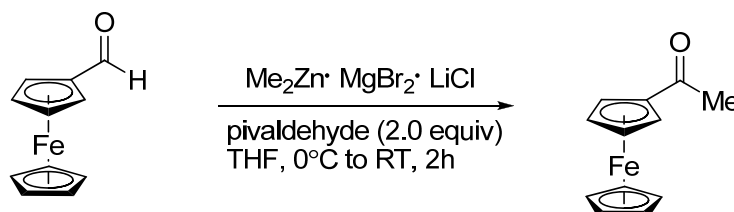

Dimethylzinc (4.0 ml, 4.0 mmol, 1.0 M in toluene) was added slowly to a THF solution (10 ml) containing  $\text{MgBr}_2$  (0.74g, 4.0 mmol), ferrocenecarboxaldehyde (2.0 mmol, 0.19 g), pivaldehyde (0.34g, 4mmol) under ice-water bath. After the reaction mixture was stirred at room temperature for 2 hours, the reaction mixture was quenched by aqueous  $\text{NH}_4\text{Cl}$  (10 mL). 10 mL of ethyl acetate was then added and the organic phase was separated, washed with 10 mL of water and then with 10 ml of brine. The water phase was extracted with ethyl acetate (2×10 mL). The organic phase was combined, dried ( $\text{Na}_2\text{SO}_4$ ) and concentrated under reduced pressure. The ketone acetylferrocene **3p** was obtained by column chromatography on silica gel using petroleum/ethyl acetate as an eluent. 0.33 g, 72% yield.  $^1\text{H}$  NMR (600 MHz,  $\text{CDCl}_3$ )  $\delta$  (ppm): 2.39 (s, 3H), 4.16 (s, 1H), 4.21(s, 4H), 4.50 (s, 2H), 4.77 (s, 2H).  $^{13}\text{C}$  NMR (151 MHz,  $\text{CDCl}_3$ )  $\delta$  (ppm): 27.4, 67.9, 69.6, 69.8, 72.3, 202.0.

**6a: benzo[d][1,3]dioxol-5-yl(phenyl)methanone** <sup>[5]</sup>

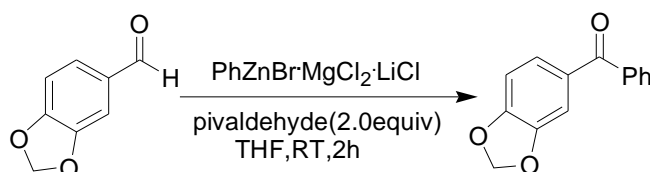

According to general procedure B: The phenylzinc reagent prepared by general procedure A1 (about 4.0 mmol) was added slowly to a THF solution (10 ml) containing piperonal (2.0 mmol, 0.30 g) and pivaldehyde (0.34g, 4.0 mmol, 0.43 ml) under ice-water bath. After the reaction mixture was stirred at room temperature for 2 hours, the reaction mixture was quenched by aqueous  $\text{NH}_4\text{Cl}$  (10 mL). 10 mL of ethyl acetate was then added and the organic phase was separated, washed with 10 mL of water and then with 10 ml of brine. The water phase was extracted with ethyl acetate (2×10 mL). The organic phase was combined, dried ( $\text{Na}_2\text{SO}_4$ ) and concentrated under reduced pressure. 0.36g, 79% yield of **6a** was obtained after column chromatography on silica gel using petroleum/ethyl acetate as an eluent.  $^1\text{H}$  NMR (400 MHz,  $\text{CDCl}_3$ )  $\delta$  (ppm): 6.07 (s, 2H), 6.85 (dt,  $J = 8.4, 0.8$  Hz, 1H), 7.30-7.40 (m,

2H), 7.47 (t,  $J = 8.0$  Hz, 2H), 7.57 (t,  $J = 7.2$  Hz, 1H), 7.74 (d,  $J = 7.2$  Hz, 2H);  $^{13}\text{C}$  NMR (100 MHz,  $\text{CDCl}_3$ )  $\delta$  (ppm): 101.9, 107.9, 109.7, 126.6, 127.7, 128.7, 129.6, 138.0, 147.6, 151.4, 195.1.

**6b: 2-Methylbenzaldehyde** <sup>[5]</sup>

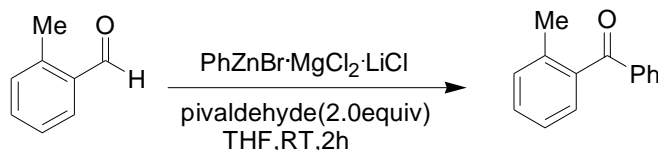

According to general procedure B: The phenylzinc reagent prepared by general procedure A1 (about 4.0 mmol) was added slowly to a THF solution (10 ml) containing 2-methylbenzaldehyde (2.0 mmol, 0.24 g) and pivaldehyde (0.34g, 4.0 mmol, 0.43 ml) under ice-water bath. After the reaction mixture was stirred at room temperature for 2 hours, the reaction mixture was quenched by aqueous  $\text{NH}_4\text{Cl}$  (10 mL). 10 mL of ethyl acetate was then added and the organic phase was separated, washed with 10 mL of water and then with 10 ml of brine. The water phase was extracted with ethyl acetate ( $2 \times 10$  mL). The organic phase was combined, dried ( $\text{Na}_2\text{SO}_4$ ) and concentrated under reduced pressure. 0.33 g, 84% yield of **6b** was obtained after column chromatography on silica gel using petroleum/ethyl acetate as an eluent.  $^1\text{H}$  NMR (600 MHz,  $\text{CDCl}_3$ )  $\delta$  (ppm): 2.33 (s, 3H), 7.24 (d,  $J = 7.5$  Hz, 1H), 7.29 (d,  $J = 7.7$  Hz, 1H), 7.31 (d,  $J = 7.5$  Hz, 1H), 7.39 (t,  $J = 7.5$  Hz, 1H), 7.46 (t,  $J = 7.6$  Hz, 2H), 7.58 (t,  $J = 7.2$  Hz, 1H), 7.80 (d,  $J = 7.6$  Hz, 2H).  $^{13}\text{C}$  NMR (151 MHz,  $\text{CDCl}_3$ )  $\delta$  (ppm): 19.9, 125.1, 128.4, 128.4, 130.1, 130.2, 130.9, 133.0, 136.7, 137.7, 138.6, 198.6.

**6c: 2-Methoxybenzaldehyde** <sup>[8]</sup>

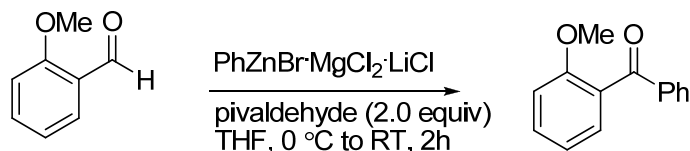

According to general procedure B: The phenylzinc reagent prepared by general procedure A1 (about 4.0 mmol) was added slowly to a THF solution (10 ml) containing 2-methoxybenzaldehyde (2.0 mmol, 0.27 g) and pivaldehyde (0.34g, 4.0 mmol, 0.43 ml) under ice-water bath. After the reaction mixture was stirred at room temperature for 2 hours, the reaction mixture was quenched by aqueous  $\text{NH}_4\text{Cl}$  (10 mL). 10 mL of ethyl acetate was then added and the organic phase was separated, washed with 10 mL of water and then with 10 ml of brine. The water phase was extracted with ethyl acetate ( $2 \times 10$  mL). The organic phase was combined, dried ( $\text{Na}_2\text{SO}_4$ ) and concentrated under reduced pressure. 0.32 g, 76% yield of **6c** was obtained after column chromatography on silica gel using petroleum/ethyl acetate as an eluent.  $^1\text{H}$  NMR (600 MHz,  $\text{CDCl}_3$ )  $\delta$  (ppm): 3.76 (s, 3H), 7.00 (d,  $J = 8.4$  Hz, 1H), 7.04 (t,  $J = 7.8$  Hz, 1H), 7.36 (d,  $J = 6.6$  Hz, 1H), 7.42 (t,  $J = 7.8$  Hz, 2H), 7.47 (t,  $J = 7.2$  Hz, 1H), 7.55 (t,  $J = 7.8$  Hz, 1), 7.81 (d,  $J = 7.2$  Hz, 2H).  $^{13}\text{C}$  NMR (151 MHz,  $\text{CDCl}_3$ )  $\delta$  (ppm): 55.6, 111.4, 120.5, 128.2, 128.9, 129.6, 129.8, 131.8, 132.9, 137.7, 157.6, 196.6.

**6d: 4-Fluorobenzophenone** <sup>[5]</sup>

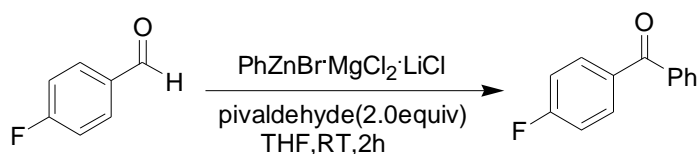

According to general procedure B: The phenylzinc reagent prepared by general procedure A1 (about 4.0 mmol) was added slowly to a THF solution (10 ml) containing 4-fluorobenzaldehyde (2.0 mmol, 0.25 g) and pivaldehyde (0.34g, 4.0 mmol, 0.43 ml) under ice-water bath. After the reaction mixture was stirred at room temperature for 2 hours, the reaction mixture was quenched by aqueous  $\text{NH}_4\text{Cl}$  (10 mL). 10 mL of ethyl acetate was then added and the organic phase was separated, washed with 10 mL of water and then with 10 ml of brine. The water phase was extracted with ethyl acetate (2×10 mL). The organic phase was combined, dried ( $\text{Na}_2\text{SO}_4$ ) and concentrated under reduced pressure. 0.32g, 80% yield of 4-Fluorobenzophenone **6d** was obtained after column chromatography on silica gel using petroleum/ethyl acetate as an eluent.  $^1\text{H}$  NMR (400 MHz,  $\text{CDCl}_3$ )  $\delta$  (ppm): 7.16 (t,  $J = 8.4$  Hz, 2H), 7.49 (t,  $J = 8.0$  Hz, 2H), 7.60 (t,  $J = 7.6$  Hz, 1H), 7.77 (ttd,  $J = 6.8, 1.6, 0.4$  Hz, 2H), 7.82-7.87 (m, 2H);  $^{19}\text{F}$  NMR (376 MHz,  $\text{CDCl}_3$ )  $\delta$  (ppm): -106.4.  $^{13}\text{C}$  NMR (100 MHz,  $\text{CDCl}_3$ )  $\delta$  (ppm): 115.4 (d,  $J = 21.7$  Hz), 128.3, 129.8, 132.4, 132.6 (d,  $J = 9.1$  Hz), 133.7 (d,  $J = 3.0$  Hz), 137.4, 165.3 (d,  $J = 252.6$  Hz), 195.1.

#### **6e: 4-Chlorobenzophenone** <sup>[11]</sup>

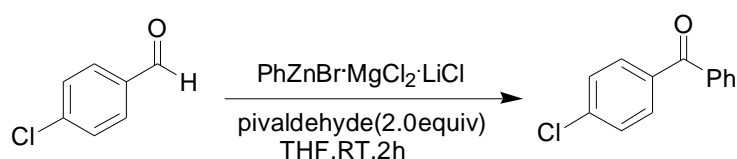

According to general procedure B: The phenylzinc reagent prepared by general procedure A1 (about 4.0 mmol) was added slowly to a THF solution (10 ml) containing 4-chlorobenzaldehyde (2.0 mmol, 0.28 g) and pivaldehyde (0.34g, 4.0 mmol, 0.43 ml) under ice-water bath. After the reaction mixture was stirred at room temperature for 2 hours, the reaction mixture was quenched by aqueous  $\text{NH}_4\text{Cl}$  (10 mL). 10 mL of ethyl acetate was then added and the organic phase was separated, washed with 10 mL of water and then with 10 ml of brine. The water phase was extracted with ethyl acetate (2×10 mL). The organic phase was combined, dried ( $\text{Na}_2\text{SO}_4$ ) and concentrated under reduced pressure. 0.35 g, 81% yield of 4-chlorobenzophenone **6e** was obtained after column chromatography on silica gel using petroleum/ethyl acetate as an eluent.  $^1\text{H}$  NMR (400 MHz,  $\text{CDCl}_3$ )  $\delta$  (ppm): 7.44-7.53 (m, 4H), 7.61 (tt,  $J = 7.6, 2.0$  Hz, 1H), 7.75-7.80 (m, 4H);  $^{13}\text{C}$  NMR (100 MHz,  $\text{CDCl}_3$ )  $\delta$  (ppm): 128.3, 128.6, 129.9, 131.4, 132.6, 135.8, 137.1, 138.8, 195.5.

#### **6f: 2-Chlorobenzophenone** <sup>[7]</sup>

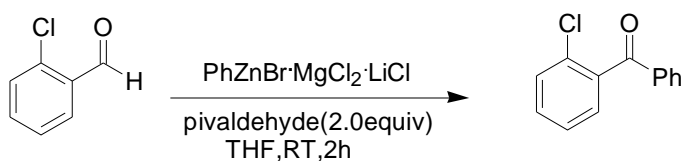

According to general procedure B: The phenylzinc reagent prepared by general procedure A1 (about 4.0 mmol) was added slowly to a THF solution (10 ml) containing 2-chlorobenzaldehyde (2.0 mmol, 0.28 g) and pivaldehyde (0.34g, 4.0 mmol, 0.43 ml) under ice-water bath. After the reaction mixture was stirred at room temperature for 2 hours, the reaction mixture was quenched by aqueous  $\text{NH}_4\text{Cl}$  (10 mL). 10 mL of ethyl acetate was then added and the organic phase was separated, washed with 10 mL of water and then with 10 ml of brine. The water phase was extracted with ethyl acetate ( $2 \times 10$  mL). The organic phase was combined, dried ( $\text{Na}_2\text{SO}_4$ ) and concentrated under reduced pressure. 0.32g, 75% yield of 2-chlorobenzophenone **6f** was obtained after column chromatography on silica gel using petroleum/ethyl acetate as an eluent.  $^1\text{H}$  NMR (400 MHz,  $\text{CDCl}_3$ )  $\delta$  (ppm): 7.36-7.40 (m, 2H), 7.45-7.50 (m, 4H), 7.61 (t,  $J = 7.2$  Hz, 1H), 7.82 (dd,  $J = 8.4, 1.2$  Hz, 2H);  $^{13}\text{C}$  NMR (100 MHz,  $\text{CDCl}_3$ )  $\delta$  (ppm): 126.7, 128.6, 129.1, 130.1, 131.1, 133.7, 136.5, 138.6, 195.2.

**6g: 3-Nitrobenzophenone**<sup>[7]</sup>

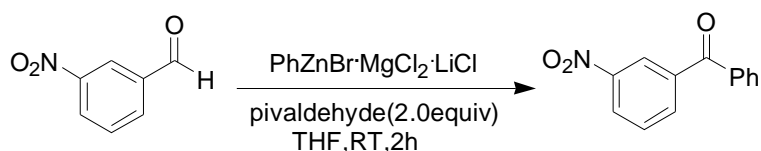

According to general procedure B: The phenylzinc reagent prepared by general procedure A1 (about 4.0 mmol) was added slowly to a THF solution (10 ml) containing 3-nitrobenzaldehyde (2.0 mmol, 0.30 g) and pivaldehyde (0.34g, 4.0 mmol, 0.43 ml) under ice-water bath. After the reaction mixture was stirred at room temperature for 2 hours, the reaction mixture was quenched by aqueous  $\text{NH}_4\text{Cl}$  (10 mL). 10 mL of ethyl acetate was then added and the organic phase was separated, washed with 10 mL of water and then with 10 ml of brine. The water phase was extracted with ethyl acetate ( $2 \times 10$  mL). The organic phase was combined, dried ( $\text{Na}_2\text{SO}_4$ ) and concentrated under reduced pressure. 0.35 g, 77% yield of 3-nitrobenzophenone **6g** was obtained after column chromatography on silica gel using petroleum/ethyl acetate as an eluent.  $^1\text{H}$  NMR (400 MHz,  $\text{CDCl}_3$ )  $\delta$  (ppm): 7.54 (t,  $J = 7.2$  Hz, 2H), 7.67 (tt,  $J = 7.6, 2.0$  Hz, 2H), 7.71 (t,  $J = 8.0$  Hz, 1H), 7.79-7.83 (m, 1H), 8.15 (ddd,  $J = 7.6, 1.6, 1.2$  Hz, 1H), 8.45 (ddd,  $J = 8.4, 2.4, 1.2$  Hz, 1H), 8.63 (td,  $J = 2.0, 0.4$  Hz, 1H);  $^{13}\text{C}$  NMR (100 MHz,  $\text{CDCl}_3$ )  $\delta$  (ppm): 124.7, 126.7, 128.7, 129.6, 129.9, 133.3, 135.4, 136.2, 139.0, 148.0, 194.1.

**6h: 4-Cyanobenzophenone**<sup>[8]</sup>

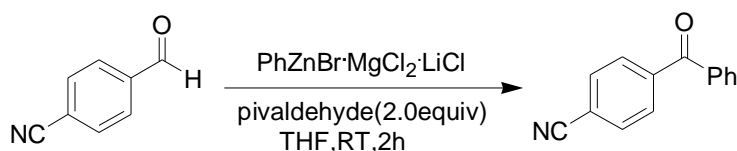

According to general procedure B: The phenylzinc reagent prepared by general procedure A1 (about 4.0 mmol) was added slowly to a THF solution (10 ml) containing 4-cyanobenzaldehyde (2.0 mmol, 0.26 g) and pivaldehyde (0.34g, 4.0 mmol, 0.43 ml) under ice-water bath. After the reaction mixture was stirred at room temperature for 2 hours, the reaction mixture was quenched by aqueous

NH<sub>4</sub>Cl (10 mL). 10 mL of ethyl acetate was then added and the organic phase was separated, washed with 10 mL of water and then with 10 mL of brine. The water phase was extracted with ethyl acetate (2×10 mL). The organic phase was combined, dried (Na<sub>2</sub>SO<sub>4</sub>) and concentrated under reduced pressure. 0.31 g, 75% yield of 4-cyanobenzophenone **6h** was obtained after column chromatography on silica gel using petroleum/ethyl acetate as an eluent. <sup>1</sup>H NMR (400 MHz, CDCl<sub>3</sub>) δ (ppm): 7.52 (t, *J* = 7.6 Hz, 2H), 7.65 (tt, *J* = 7.6, 1.6 Hz, 1H), 7.77-7.83 (m, 4H), 7.89 (dt, *J* = 8.8, 2.0 Hz, 2H). <sup>13</sup>C NMR (100 MHz, CDCl<sub>3</sub>) δ (ppm): 115.6, 118.0, 128.6, 130.1, 130.2, 132.0, 133.3, 136.33, 141.3, 195.0.

**6i: Methyl-4-acetylbenzoate**<sup>[11]</sup>

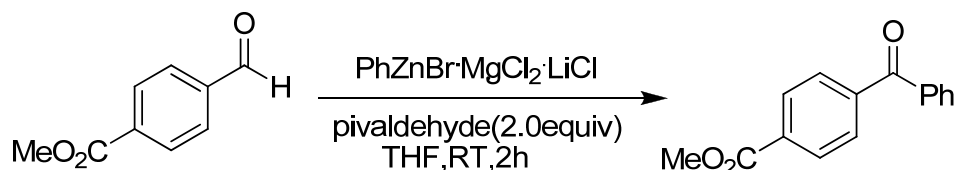

According to general procedure B: The phenylzinc reagent prepared by general procedure A1 (about 4.0 mmol) was added slowly to a THF solution (10 mL) containing methyl 4-formylbenzoate (2.0 mmol, 0.33 g) and pivaldehyde (0.34g, 4.0 mmol, 0.43 mL) under ice-water bath. After the reaction mixture was stirred at room temperature for 2 hours, the reaction mixture was quenched by aqueous NH<sub>4</sub>Cl (10 mL). 10 mL of ethyl acetate was then added and the organic phase was separated, washed with 10 mL of water and then with 10 mL of brine. The water phase was extracted with ethyl acetate (2×10 mL). The organic phase was combined, dried (Na<sub>2</sub>SO<sub>4</sub>) and concentrated under reduced pressure. 0.33 g, 70% yield of methyl-4-acetylbenzoate **6i** was obtained after column chromatography on silica gel using petroleum/ethyl acetate as an eluent. <sup>1</sup>H NMR (600 MHz, CDCl<sub>3</sub>) δ (ppm): 3.97 (d, *J* = 0.6 Hz, 3H), 7.50 (s, 2H), 7.62 (s, 1H), 7.83 (dd, *J* = 22.6, 5.6 Hz, 4H), 8.15 (d, *J* = 6.0 Hz, 2H). <sup>13</sup>C NMR (151 MHz, CDCl<sub>3</sub>) δ (ppm): 52.4, 128.4, 129.4, 129.7, 130.0, 132.9, 133.2, 136.9, 141.3, 166.3, 196.0.

**6j: 4,4'-Dichlorobenzophenone**<sup>[12]</sup>

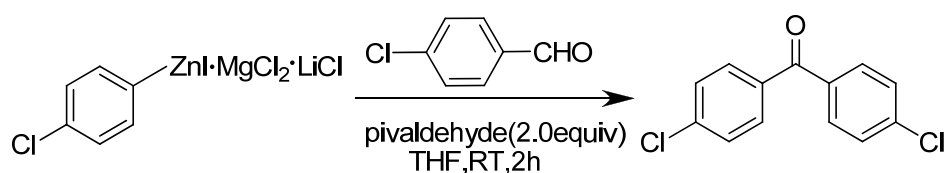

According to general procedure B: The 4-chlorophenylzinc iodide prepared by general procedure A1 (about 4.0 mmol) was added slowly to a THF solution (10 mL) containing 4-chlorobenzaldehyde (2.0 mmol, 0.28 g) and pivaldehyde (0.34g, 4.0 mmol, 0.43 mL) under ice-water bath. After the reaction mixture was stirred at room temperature for 2 hours, the reaction mixture was quenched by aqueous NH<sub>4</sub>Cl (10 mL). 10 mL of ethyl acetate was then added and the organic phase was separated, washed with 10 mL of water and then with 10 mL of brine. The water phase was extracted with ethyl acetate (2×10 mL). The organic phase was combined, dried (Na<sub>2</sub>SO<sub>4</sub>) and concentrated under reduced pressure. 0.36 g, 71% yield of 4,4'-Dichlorobenzophenone **6j** was obtained after column chromatography on

silica gel using petroleum/ethyl acetate as an eluent.  $^1\text{H}$  NMR (400 MHz,  $\text{CDCl}_3$ )  $\delta$  (ppm): 7.47 (d,  $J = 8.0$  Hz, 4H), 7.73 (d,  $J = 8.0$  Hz, 4H);  $^{13}\text{C}$  NMR (100 MHz,  $\text{CDCl}_3$ )  $\delta$  (ppm): 128.7, 131.2, 135.5, 139.1, 194.1.

**6k: 2-benzoylfuran** <sup>[11]</sup>

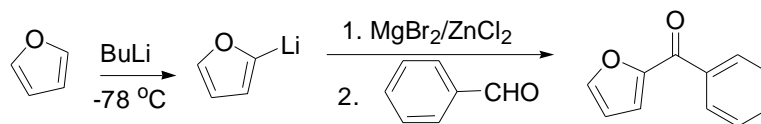

To a dry, three-necked 100 mL round-bottomed flask equipped with an argon inlet, an addition funnel was placed a magnetic stirring bar and the air in the reaction system was then changed to argon. Furan (0.27g, 0.29 mL, 4.0 mmol) in 5 ml of THF was added and the reaction system was cooled to  $-78\text{ }^\circ\text{C}$ . *n*-BuLi in hexane (2.5 M, 1.6 mL, 4.0 mmol) was then added and the reaction temperature was raised to  $-40\text{ }^\circ\text{C}$  gradually.  $\text{MgBr}_2$  and  $\text{ZnCl}_2$  in THF prepared according to general procedure A was then added and the reaction mixture was stirred until the reaction temperature reached room temperature.

The above prepared methoxyl 2-furanyl methylzincate was added slowly to a THF solution (10 ml) containing benzaldehyde (2.0 mmol, 0.21g) and pivaldehyde (0.34g, 4.0 mmol, 0.43 ml) under ice-water bath. After the reaction mixture was stirred at room temperature for 2 hours, the reaction mixture was quenched by aqueous  $\text{NH}_4\text{Cl}$  (10 mL). 10 mL of ethyl acetate was then added and the organic phase was separated, washed with 10 mL of water and then with 10 ml of brine. The water phase was extracted with ethyl acetate (2×10 mL). The organic phase was combined, dried ( $\text{Na}_2\text{SO}_4$ ) and concentrated under reduced pressure. The pure product **6k** was obtained as a yellowish liquid (0.24 g, 68%) after purification on silica gel (10:1~5:1 petroleum ether: EtOAc). IR (KBr)  $\nu$  ( $\text{cm}^{-1}$ ): 2924, 2852, 1647, 1599, 1561, 1463, 1390, 1297, 1226, 1178, 1148, 1080, 1020, 956;  $^1\text{H}$  NMR (400 MHz,  $\text{CDCl}_3$ )  $\delta$  (ppm): 6.60 (q,  $J = 2.0$  Hz, 1H), 7.24 (dd,  $J = 3.2, 0.8$  Hz, 1H), 7.50 (t,  $J = 7.2$  Hz, 2H), 7.60 (tt,  $J = 7.2, 0.8$  Hz, 1H), 7.715-7.717(m, 1H), 7.96 (dd,  $J = 7.6, 1.2$  Hz, 2H);  $^{13}\text{C}$  NMR (100 MHz,  $\text{CDCl}_3$ )  $\delta$  (ppm): 112.2, 120.5, 128.3, 129.2, 132.5, 137.2, 147.0, 152.2, 182.5.

**6l: (4-Dimethylamino-phenyl)-thiophen-2-yl-methanone** <sup>[13]</sup>

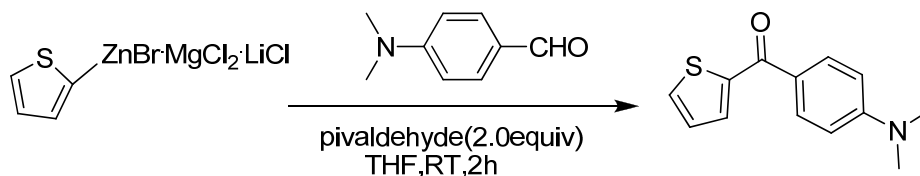

According to general procedure B: The 2-thienylzinc reagent prepared by general procedure A1 (about 4.0 mmol) was added slowly to a THF solution (10 ml) containing 4-dimethylamino benzaldehyde (2.0 mmol, 0.30 g) and pivaldehyde (0.34g, 4.0 mmol, 0.43 ml) under ice-water bath. After the reaction mixture was stirred at room temperature for 2 hours, the reaction mixture was

quenched by aqueous  $\text{NH}_4\text{Cl}$  (10 mL). 10 mL of ethyl acetate was then added and the organic phase was separated, washed with 10 mL of water and then with 10 mL of brine. The water phase was extracted with ethyl acetate ( $2 \times 10$  mL). The organic phase was combined, dried ( $\text{Na}_2\text{SO}_4$ ) and concentrated under reduced pressure. The ketone **6l** was obtained by column chromatography on silica gel using petroleum/ethyl acetate as an eluent. 0.29 g, 65% yield.  $^1\text{H}$  NMR (600 MHz,  $\text{CDCl}_3$ )  $\delta$  (ppm): 3.08 (d,  $J = 1.7$  Hz, 6H), 6.71 (dd,  $J = 8.9, 1.8$  Hz, 2H), 7.26 (m, 1H), 7.63 (m, 2H), 7.90 (m, 2H).  $^{13}\text{C}$  NMR (151 MHz,  $\text{CDCl}_3$ )  $\delta$  (ppm): 40.6, 111.5, 120.9, 127.7, 131.1, 132.0, 132.5, 133.2, 144.5, 186.4.

**6m: 3-(4-nitrobenzoyl) thiophene** <sup>[7]</sup>

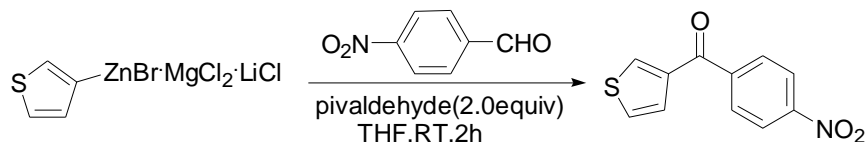

According to general procedure B: The 3-thienylzinc reagent prepared by general procedure A1 (about 4.0 mmol) was added slowly to a THF solution (10 mL) containing 4-nitrobenzaldehyde (2.0 mmol, 0.21 g) and pivalaldehyde (0.30g, 4.0 mmol, 0.43 mL) under ice-water bath. After the reaction mixture was stirred at room temperature for 2 hours, the reaction mixture was quenched by aqueous  $\text{NH}_4\text{Cl}$  (10 mL). 10 mL of ethyl acetate was then added and the organic phase was separated, washed with 10 mL of water and then with 10 mL of brine. The water phase was extracted with ethyl acetate ( $2 \times 10$  mL). The organic phase was combined, dried ( $\text{Na}_2\text{SO}_4$ ) and concentrated under reduced pressure. 0.26 g, 56% yield of 3-(4'-Nitrobenzoyl) thiophene **6m** was obtained after column chromatography on silica gel using petroleum/ethyl acetate as an eluent.  $^1\text{H}$  NMR (400 MHz,  $\text{CDCl}_3$ )  $\delta$  (ppm): 7.21 (dd,  $J = 4.8, 4.0$  Hz, 1H), 7.62 (dd,  $J = 3.6, 1.2$  Hz, 1H), 7.83 (dd,  $J = 5.2, 1.2$  Hz, 1H), 8.00 (dt,  $J = 8.0, 2.4$  Hz, 2H), 8.37 (dt,  $J = 8.8, 2.0$  Hz, 2H);  $^{13}\text{C}$  NMR (100 MHz,  $\text{CDCl}_3$ )  $\delta$  (ppm): 123.7, 128.4, 129.8, 129.9, 135.4, 135.6, 142.6, 143.3, 149.8, 186.2.

**6n: Benzoylferrocene** <sup>[10]</sup>

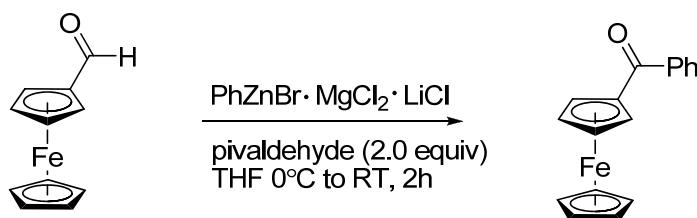

According to general procedure B: The phenylzinc reagent prepared by general procedure A1 (about 4.0 mmol) was added slowly to a THF solution (10 mL) containing ferrocenecarboxaldehyde (2.0 mmol, 0.19 g) and pivalaldehyde (0.30g, 4.0 mmol, 0.43 mL) under ice-water bath. After the reaction mixture was stirred at room temperature for 2 hours, the reaction mixture was quenched by aqueous  $\text{NH}_4\text{Cl}$  (10 mL). 10 mL of ethyl acetate was then added and the organic phase was separated, washed with 10 mL of water and then with 10 mL of brine. The water phase was extracted with ethyl acetate ( $2 \times 10$  mL). The organic phase was combined, dried ( $\text{Na}_2\text{SO}_4$ ) and concentrated under reduced pressure. 0.52 g,

82% yield of benzoylferrocene **6n** was obtained after column chromatography on silica gel using petroleum/ethyl acetate as an eluent.  $^1\text{H}$  NMR (600 MHz,  $\text{CDCl}_3$ )  $\delta$  (ppm): 4.19 (s, 4H), 4.57 (s, 2H), 4.89 (s, 2H), 7.30 (s, 1H), 7.45 (s, 2H), 7.53 (s, 1H), 7.88 (s, 2H);  $^{13}\text{C}$  NMR (100 MHz,  $\text{CDCl}_3$ )  $\delta$  (ppm): 70.2, 71.5, 72.5, 78.2, 128.0, 128.2, 131.4, 139.8, 199.1.

**6o: *i*-Butyrylferrocene** <sup>[10]</sup>

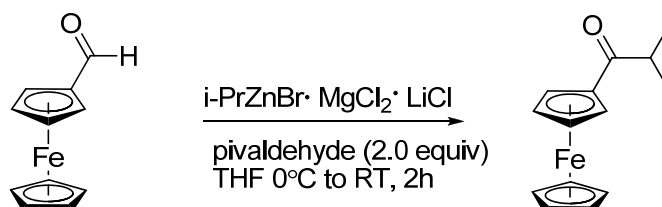

According to general procedure B: The phenylzinc reagent prepared by general procedure A1 (about 4.0 mmol) was added slowly to a THF solution (10 ml) containing ferrocenecarboxaldehyde (2.0 mmol, 0.19 g) and pivaldehyde (0.30g, 4.0 mmol, 0.43 ml) under ice-water bath. After the reaction mixture was stirred at room temperature for 2 hours, the reaction mixture was quenched by aqueous  $\text{NH}_4\text{Cl}$  (10 mL). 10 mL of ethyl acetate was then added and the organic phase was separated, washed with 10 mL of water and then with 10 ml of brine. The water phase was extracted with ethyl acetate (2×10 mL). The organic phase was combined, dried ( $\text{Na}_2\text{SO}_4$ ) and concentrated under reduced pressure. 0.42 g, 74% yield of *i*-butyrylferrocene **6o** was obtained after column chromatography on silica gel using petroleum/ethyl acetate as an eluent.  $^1\text{H}$  NMR (600 MHz,  $\text{CDCl}_3$ )  $\delta$  (ppm): 4.19 (s, 4H), 4.57 (s, 2H), 4.89 (s, 2H), 7.30 (s, 1H), 7.45 (s, 2H), 7.53 (s, 1H), 7.88 (s, 2H);  $^{13}\text{C}$  NMR (100 MHz,  $\text{CDCl}_3$ )  $\delta$  (ppm): 70.2, 71.5, 72.5, 78.2, 128.0, 128.2, 131.4, 139.8, 199.1.

**9a: 4-(4-Methoxy-benzoyl)-benzoic acid ethyl ester** <sup>[14]</sup>

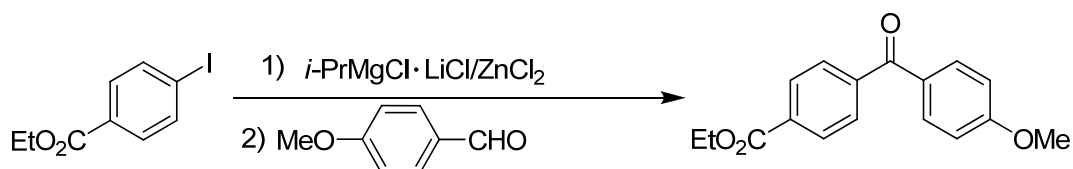

According to general procedure B: The (4-(ethoxycarbonyl)phenyl)zinc iodide prepared from ethyl 4-iodobenzoate by general procedure A2 (about 4.0 mmol) was added slowly to a THF solution (10 ml) containing 4-methoxybenzaldehyde (2.0 mmol, 0.27 g), pivaldehyde (0.34g, 4.0 mmol, 0.43 ml) under ice-water bath. After the reaction mixture was stirred at room temperature for 2 hours, the reaction mixture was quenched by aqueous  $\text{NH}_4\text{Cl}$  (10 mL). 10 mL of ethyl acetate was then added and the organic phase was separated, washed with 10 mL of water and then with 10 ml of brine. The water phase was extracted with ethyl acetate (2×10 mL). The organic phase was combined, dried ( $\text{Na}_2\text{SO}_4$ ) and concentrated under reduced pressure. The ketone **9a** was obtained by column chromatography on silica gel using petroleum/ethyl acetate as an eluent. 0.40 g, 70% yield.  $^1\text{H}$  NMR (400 MHz,  $\text{CDCl}_3$ )  $\delta$  (ppm): 1.26 (t,  $J = 7.1$  Hz, 3H), 3.90 (s, 3H), 4.43 (q,  $J = 7.1$  Hz, 2H), 6.97 (d,  $J =$

8.7 Hz, 2H), 7.80 (dd,  $J = 14.1, 8.4$  Hz, 4H), 8.14 (d,  $J = 8.1$  Hz, 2H).  $^{13}\text{C}$  NMR (151 MHz,  $\text{CDCl}_3$ )  $\delta$  (ppm): 14.3, 55.5, 61.3, 113.7, 129.3, 129.6, 132.6, 133.1, 142.1, 163.6, 165.9, 194.8.

**9b: 4-(3,4-Dimethoxy-benzoyl)-benzoic acid ethyl ester**

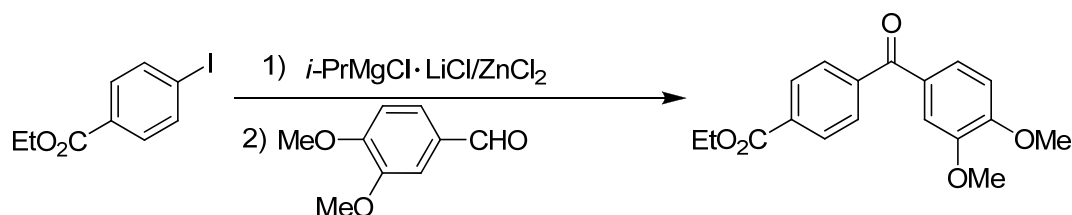

According to general procedure B: The (4-(ethoxycarbonyl)phenyl)zinc iodide prepared from ethyl 4-iodobenzoate by general procedure A2 (about 4.0 mmol) was added slowly to a THF solution (10 ml) containing 3,4-dimethoxybenzaldehyde (2.0 mmol, 0.33 g), pivaldehyde (0.34g, 4.0 mmol, 0.43 ml) under ice-water bath. After the reaction mixture was stirred at room temperature for 2 hours, the reaction mixture was quenched by aqueous  $\text{NH}_4\text{Cl}$  (10 mL). 10 mL of ethyl acetate was then added and the organic phase was separated, washed with 10 mL of water and then with 10 ml of brine. The water phase was extracted with ethyl acetate ( $2 \times 10$  mL). The organic phase was combined, dried ( $\text{Na}_2\text{SO}_4$ ) and concentrated under reduced pressure. The ketone **9b** was obtained by column chromatography on silica gel using petroleum/ethyl acetate as an eluent. 0.42 g, 74% yield.  $^1\text{H}$  NMR (600 MHz,  $\text{CDCl}_3$ )  $\delta$  (ppm): 1.43 (t,  $J = 7.1$  Hz, 3H), 3.96 (d,  $J = 13.8$  Hz, 6H), 4.43 (q,  $J = 7.1$  Hz, 2H), 6.89 (d,  $J = 8.3$  Hz, 1H), 7.36-7.33 (m, 1H), 7.50 (d,  $J = 1.7$  Hz, 1H), 7.79 (d,  $J = 8.2$  Hz, 2H), 8.15 (d,  $J = 8.2$  Hz, 2H).  $^{13}\text{C}$  NMR (151 MHz,  $\text{CDCl}_3$ )  $\delta$  (ppm): 14.3, 56.1, 61.3, 109.8, 111.9, 125.6, 129.3, 129.6, 133.1, 142.0, 149.1, 153.4, 165.9, 194.8. HRMS-ESI: calcd for  $\text{C}_{18}\text{H}_{18}\text{NaO}_5$  [ $\text{M} + \text{Na}$ ] $^+$ : 337.1052. Found: 337.1050.

**9c: Carbonyl-4-ethyl-(4'-methyl-carbonyl)-benzophenone**

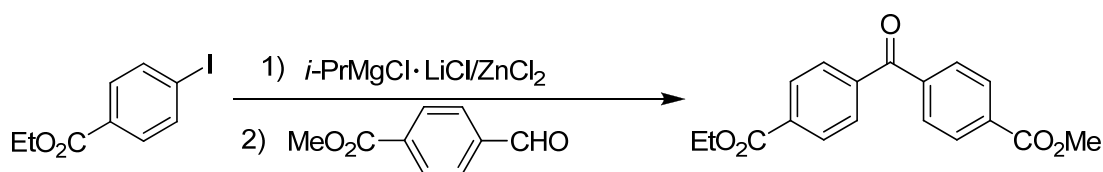

According to general procedure B: The (4-(ethoxycarbonyl)phenyl)zinc iodide prepared from ethyl 4-iodobenzoate by general procedure A2 (about 4.0 mmol) was added slowly to a THF solution (10 ml) containing methyl 4-acetylbenzoate (2.0 mmol, 0.36 g), pivaldehyde (0.34g, 4.0 mmol, 0.43 ml) under ice-water bath. After the reaction mixture was stirred at room temperature for 2 hours, the reaction mixture was quenched by aqueous  $\text{NH}_4\text{Cl}$  (10 mL). 10 mL of ethyl acetate was then added and the organic phase was separated, washed with 10 mL of water and then with 10 ml of brine. The water phase was extracted with ethyl acetate ( $2 \times 10$  mL). The organic phase was combined, dried ( $\text{Na}_2\text{SO}_4$ ) and concentrated under reduced pressure. The ketone **9c** was obtained by column chromatography on silica gel using petroleum/ethyl acetate as an eluent. 0.47 g, 75% yield.  $^1\text{H}$  NMR (600 MHz,  $\text{CDCl}_3$ )  $\delta$

(ppm): 4.07 (s, 3H), 7.65 (t,  $J = 7.8$  Hz, 1H), 7.85 (d,  $J = 8.3$  Hz, 2H), 7.88 (d,  $J = 7.8$  Hz, 1H), 7.98 (d,  $J = 7.8$  Hz, 1H), 8.07 (s, 1H), 8.19 (d,  $J = 8.3$  Hz, 2H), 8.19 (d,  $J = 8.3$  Hz, 2H).  $^{13}\text{C}$  NMR (151 MHz,  $\text{CDCl}_3$ )  $\delta$  (ppm): 14.3, 52.5, 61.5, 129.5, 129.6, 129.7, 129.8, 133.9, 134.0, 140.4, 140.6, 165.9, 166.1, 195.3. HRMS-ESI: calcd for  $\text{C}_{18}\text{H}_{16}\text{NaO}_5$   $[\text{M} + \text{Na}]^+$ : 335.0895. Found: 335.0892.

**9d: 4-(3-Trifluoromethyl-benzoyl)-benzoic acid methyl ester**

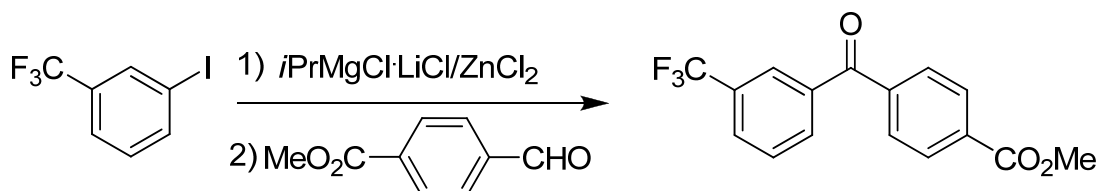

According to general procedure B: The 3-trifluoromethylphenylzinc iodide prepared from 1-iodo-3-(trifluoromethyl)benzene by general procedure A2 (about 4.0 mmol) was added slowly to a THF solution (10 ml) containing Methyl 4-acetylbenzoate (2.0 mmol, 0.36 g), pivaldehyde (0.34g, 4.0 mmol, 0.43 ml) under ice-water bath. After the reaction mixture was stirred at room temperature for 2 hours, the reaction mixture was quenched by aqueous  $\text{NH}_4\text{Cl}$  (10 mL). 10 mL of ethyl acetate was then added and the organic phase was separated, washed with 10 mL of water and then with 10 ml of brine. The water phase was extracted with ethyl acetate (2×10 mL). The organic phase was combined, dried ( $\text{Na}_2\text{SO}_4$ ) and concentrated under reduced pressure. The ketone **9d** was obtained by column chromatography on silica gel using petroleum/ethyl acetate as an eluent. 0.49 g, 80% yield.  $^1\text{H}$  NMR (600 MHz,  $\text{CDCl}_3$ )  $\delta$  (ppm): 4.07 (s, 3H), 7.65 (t,  $J = 7.8$  Hz, 1H), 7.85 (d,  $J = 8.3$  Hz, 2H), 7.88 (d,  $J = 7.8$  Hz, 1H), 7.98 (d,  $J = 7.8$  Hz, 1H), 8.07 (s, 1H), 8.19 (d,  $J = 8.3$  Hz, 2H), 8.19 (d,  $J = 8.3$  Hz, 2H).  $^{19}\text{F}$  NMR (376 MHz,  $\text{CDCl}_3$ )  $\delta$  (ppm): -63.2.  $^{13}\text{C}$  NMR (151 MHz,  $\text{CDCl}_3$ )  $\delta$  (ppm): 74.7, 123.5 (q,  $J = 271.1$  Hz,  $\text{CF}_3$ ), 126.7 (q,  $J = 3.5$  Hz), 129.1, 129.3 (q,  $J = 3.0$  Hz), 129.6, 129.7, 131.2 (q,  $J = 32.6$  Hz), 133.1, 134.2, 137.6, 140.2, 165.6, 194.5. HRMS-ESI: calcd for  $\text{C}_{16}\text{H}_{11}\text{F}_3\text{NaO}_3$   $[\text{M} + \text{Na}]^+$ : 331.0558. Found: 331.0554.

**9e: (3-(trifluoromethyl)phenyl)(3,4,5-trimethoxyphenyl)methanone**

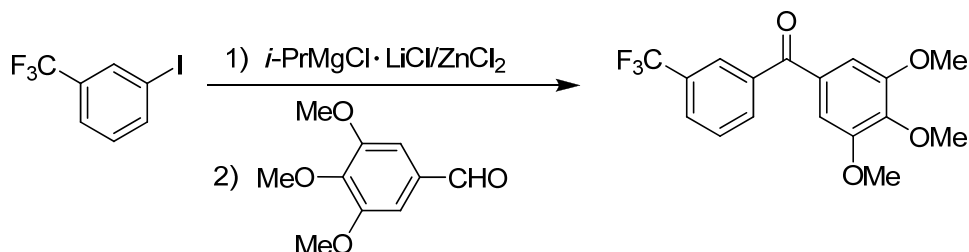

According to general procedure B: The 3-trifluoromethylphenylzinc iodide prepared from 1-iodo-3-(trifluoromethyl)benzene by general procedure A2 (about 4.0 mmol) was added slowly to a THF solution (10 ml) containing 3,4,5-trimethoxybenzaldehyde (2.0 mmol, 0.39 g), pivaldehyde (0.34g, 4.0 mmol, 0.43 ml) under ice-water bath. After the reaction mixture was stirred at room temperature for 2 hours, the reaction mixture was quenched by aqueous  $\text{NH}_4\text{Cl}$  (10 mL). 10 mL of ethyl acetate was then

added and the organic phase was separated, washed with 10 mL of water and then with 10 ml of brine. The water phase was extracted with ethyl acetate (2×10 mL). The organic phase was combined, dried ( $\text{Na}_2\text{SO}_4$ ) and concentrated under reduced pressure. The ketone **9e** was obtained by column chromatography on silica gel using petroleum/ethyl acetate as an eluent. 0.57 g, 84% yield.  $^1\text{H}$  NMR (600 MHz,  $\text{CDCl}_3$ )  $\delta$  (ppm): 3.88 (s, 6H), 3.96 (s, 3H), 7.05 (s, 2H), 7.64 (t,  $J = 7.8$  Hz, 2H), 7.85 (d,  $J = 7.8$  Hz, 1H), 7.98 (d,  $J = 7.8$  Hz, 1H), 8.06 (s, 1H).  $^{19}\text{F}$  NMR (376 MHz,  $\text{CDCl}_3$ )  $\delta$  (ppm): -63.1.  $^{13}\text{C}$  NMR (151 MHz,  $\text{CDCl}_3$ )  $\delta$  (ppm): 56.3, 61.0, 107.8, 123.6 (q,  $J = 270.6$  Hz,  $\text{CF}_3$ ), 126.7 (q,  $J = 3.6$  Hz), 128.6 (q,  $J = 3.8$  Hz), 128.9, 130.8 (q,  $J = 33.0$  Hz), 131.6, 132.9, 138.5, 142.6, 153.0, 194.1. HRMS-ESI: calcd for  $\text{C}_{17}\text{H}_{15}\text{F}_3\text{NaO}_4$   $[\text{M} + \text{Na}]^+$ : 363.0820. Found: 363.0814.

**9f: bis(4-fluorophenyl)methanone** <sup>[15]</sup>

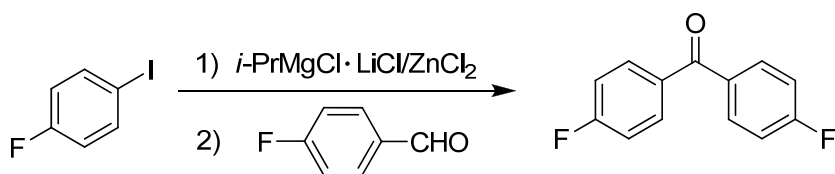

According to general procedure B: The 4-fluorophenylzinc iodide prepared from 4-fluoriodobenzene by general procedure A2 (about 4.0 mmol) was added slowly to a THF solution (10 ml) containing 4-fluorobenzaldehyde (2.0 mmol, 0.39 g), pivaldehyde (0.34g, 4.0 mmol, 0.43 ml) under ice-water bath. After the reaction mixture was stirred at room temperature for 2 hours, the reaction mixture was quenched by aqueous  $\text{NH}_4\text{Cl}$  (10 mL). 10 mL of ethyl acetate was then added and the organic phase was separated, washed with 10 mL of water and then with 10 ml of brine. The water phase was extracted with ethyl acetate (2×10 mL). The organic phase was combined, dried ( $\text{Na}_2\text{SO}_4$ ) and concentrated under reduced pressure. The ketone **9f** was obtained by column chromatography on silica gel using petroleum/ethyl acetate as an eluent. 0.34 g, 78% yield.  $^1\text{H}$  NMR (600 MHz,  $\text{CDCl}_3$ )  $\delta$  (ppm): 7.17 (t,  $J = 8.6$  Hz, 4H), 7.79-7.84 (m, 4H).  $^{19}\text{F}$  NMR (376 MHz,  $\text{CDCl}_3$ )  $\delta$  (ppm): -106.0.  $^{13}\text{C}$  NMR (150 MHz,  $\text{CDCl}_3$ )  $\delta$  (ppm): 115 (d,  $J = 21$  Hz), 132.4 (d,  $J = 9.0$  Hz), 133.7 (q,  $J = 3.0$  Hz), 165.3 (d,  $J = 252$  Hz), 193.8.

**9g: 4-(3,4,5-trimethoxybenzoyl)benzonitrile**

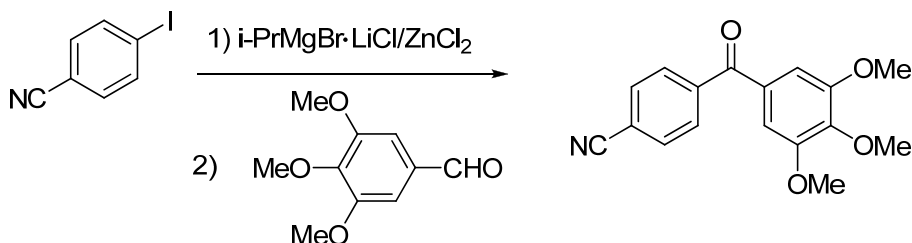

According to general procedure B: The 4-cyanophenylzinc iodide prepared from 4-iodobenzonitrile by general procedure A2 (about 4.0 mmol) was added slowly to a THF solution (10 ml) containing 3,4,5-trimethoxybenzaldehyde (2.0 mmol, 0.39 g), pivaldehyde (0.34g, 4.0 mmol, 0.43 ml) under ice-water bath. After the reaction mixture was stirred at room temperature for 2 hours, the

reaction mixture was quenched by aqueous  $\text{NH}_4\text{Cl}$  (10 mL). 10 mL of ethyl acetate was then added and the organic phase was separated, washed with 10 mL of water and then with 10 mL of brine. The water phase was extracted with ethyl acetate (2×10 mL). The organic phase was combined, dried ( $\text{Na}_2\text{SO}_4$ ) and concentrated under reduced pressure. The ketone **9g** was obtained by column chromatography on silica gel using petroleum/ethyl acetate as an eluent. 0.43 g, 72% yield.  $^1\text{H}$  NMR (600 MHz,  $\text{CDCl}_3$ )  $\delta$  (ppm): 3.86 (s, 6H), 3.95 (s, 3H), 7.01 (s, 2H), 7.79 (d,  $J = 8.6$  Hz, 2H), 7.84 (d,  $J = 8.4$  Hz, 2H).  $^{13}\text{C}$  NMR (150 MHz,  $\text{CDCl}_3$ )  $\delta$  (ppm): 56.4, 61.0, 107.8, 115.5, 117.9, 130.0, 131.2, 132.1, 141.6, 142.9, 153.1, 194.0. HRMS-ESI: calcd for  $\text{C}_{17}\text{H}_{15}\text{NNaO}_4$   $[\text{M} + \text{Na}]^+$ : 320.0899. Found: 320.0897.

**10: (4-Fluoro-phenyl)-thiophen-2-yl-methanone<sup>[16]</sup>**

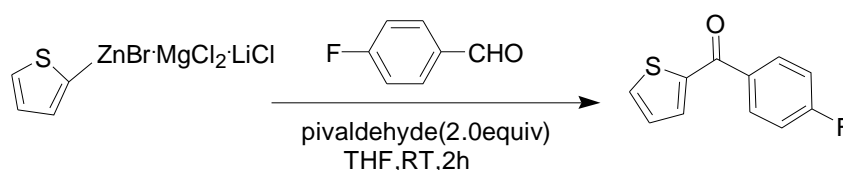

According to general procedure B: The 2-thienylzinc reagent prepared by general procedure A1 from 2-bromothiophene (4.89g, 30 mmol), magnesium turnings (0.9 g, 37 mmol).  $\text{ZnCl}_2$  (4.1g, 30 mmol), and  $\text{LiCl}$  (1.3g, 30 mmol) was added slowly to a THF solution (100 mL) containing 4-fluorobenzaldehyde (20 mmol, 2.5 g), pivalaldehyde (3.0g, 40 mmol, 4.3 mL) under ice-water bath. After the reaction mixture was stirred at room temperature for 2 hours, the reaction mixture was quenched by aqueous  $\text{NH}_4\text{Cl}$  (100 mL). 100 mL of ethyl acetate was then added and the organic phase was separated, washed with 100 mL of water and then with 100 mL of brine. The water phase was extracted with ethyl acetate (2×100 mL). The organic phase was combined, dried ( $\text{Na}_2\text{SO}_4$ ) and concentrated under reduced pressure. 2-(4'-4-fluorobenzoyl) thiophene was obtained by column chromatography on silica gel using petroleum/ethyl acetate as an eluent. 3.2 g, 78% yield.  $^1\text{H}$  NMR (600 MHz,  $\text{CDCl}_3$ )  $\delta$  (ppm): 7.18 (dd,  $J = 10.3, 6.7$  Hz, 3H), 7.63 (d,  $J = 2.9$  Hz, 1H), 7.73 (d,  $J = 4.1$  Hz, 1H), 7.91 (dd,  $J = 8.5, 5.5$  Hz, 2H).  $^{19}\text{F}$  NMR (376 MHz,  $\text{CDCl}_3$ )  $\delta$  (ppm): -106.6.  $^{13}\text{C}$  NMR (101 MHz,  $\text{CDCl}_3$ )  $\delta$  (ppm): 115.5 (d,  $J = 21$  Hz), 127.9, 131.6 (d,  $J = 9.0$  Hz), 134.2, 134.6, 143.3, 165.7 (d,  $J = 252.3$  Hz), 186.6.

- 
- [1] M. Liu, Z. Hyder, Y. Sun, W. Tang, L. Xu, J. Xiao, *Org. Biomol. Chem.*, 2010, **8**, 2012.  
 [2] K. Fujita, N. Tanino, R. Yamaguchi, *Org. Lett.*, 2007, **9**, 109.  
 [3] L. S. Ramos, M. L. da Silva, A. I. R. Luz, M. G. B. Zoghbi, J. G. S. Maia, *J. Nat. Prod.*, 1986, **49**, 712.  
 [4] T. Korenaga, R. Sasaki, K. Shimada, *Dalton Trans.*, 2015, **44**, 19642.  
 [5] C. Jin, L. Gu, M. Yuan, *Catal. Sci. Technol.*, 2015, **5**, 4341.  
 [6] H.-K. Fun, S. R. Jebas, *Acta Cryst.*, 2008, **E64**, o1466.

- 
- [7] Y. Fu, Y. Yang, H. M. Hügel, Z. Du, K. Wang, D. Huang, Y. Hu, *Org. Biomol. Chem.*, 2013, **11**, 4429.
- [8] R. J. Klotzing, A. Krasovskiy, P. Knochel, *Chem.–Eur. J.*, 2007, **13**, 215.
- [9] S. Kumar, W. Satish, A. S. Verkman, P. K. Sharma, *Bioorg. Med. Chem.*, 2012, **20**, 4237.
- [10] R. Wang, X. Hong, Z. Shan, *Tetrahedron Lett.*, 2008, **49**, 636.
- [11] L.-J. Gu, C. Jin, H.-T. Zhang, *Chem. Eur. J.*, 2015, **21**, 8741.
- [12] T. Miao, G. W. Wang, *Chem. Commun.*, 2011, **47**, 9501.
- [13] A. R. Katritzky, K. Suzuki, S. K. Singh, *Croat. Chem. Acta*, 2004, **77**, 175.
- [14] D. Lee, T. Ryu, Y. Park, P. H. Lee, *Org. Lett.*, 2014, **16**, 1144.
- [15] D. J. Adams, J. H. Clark, H. McFarland, *J. Fluorine. Chem.*, 1998, **92**, 127.
- [16] H. Wu, B. Xu, Y. Li, F. Hong, D. Zhu, J. Jian, X. Pu, Z. Zeng, *J. Org. Chem.*, 2016, **81**, 2987.

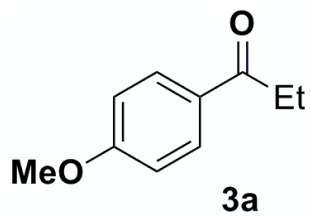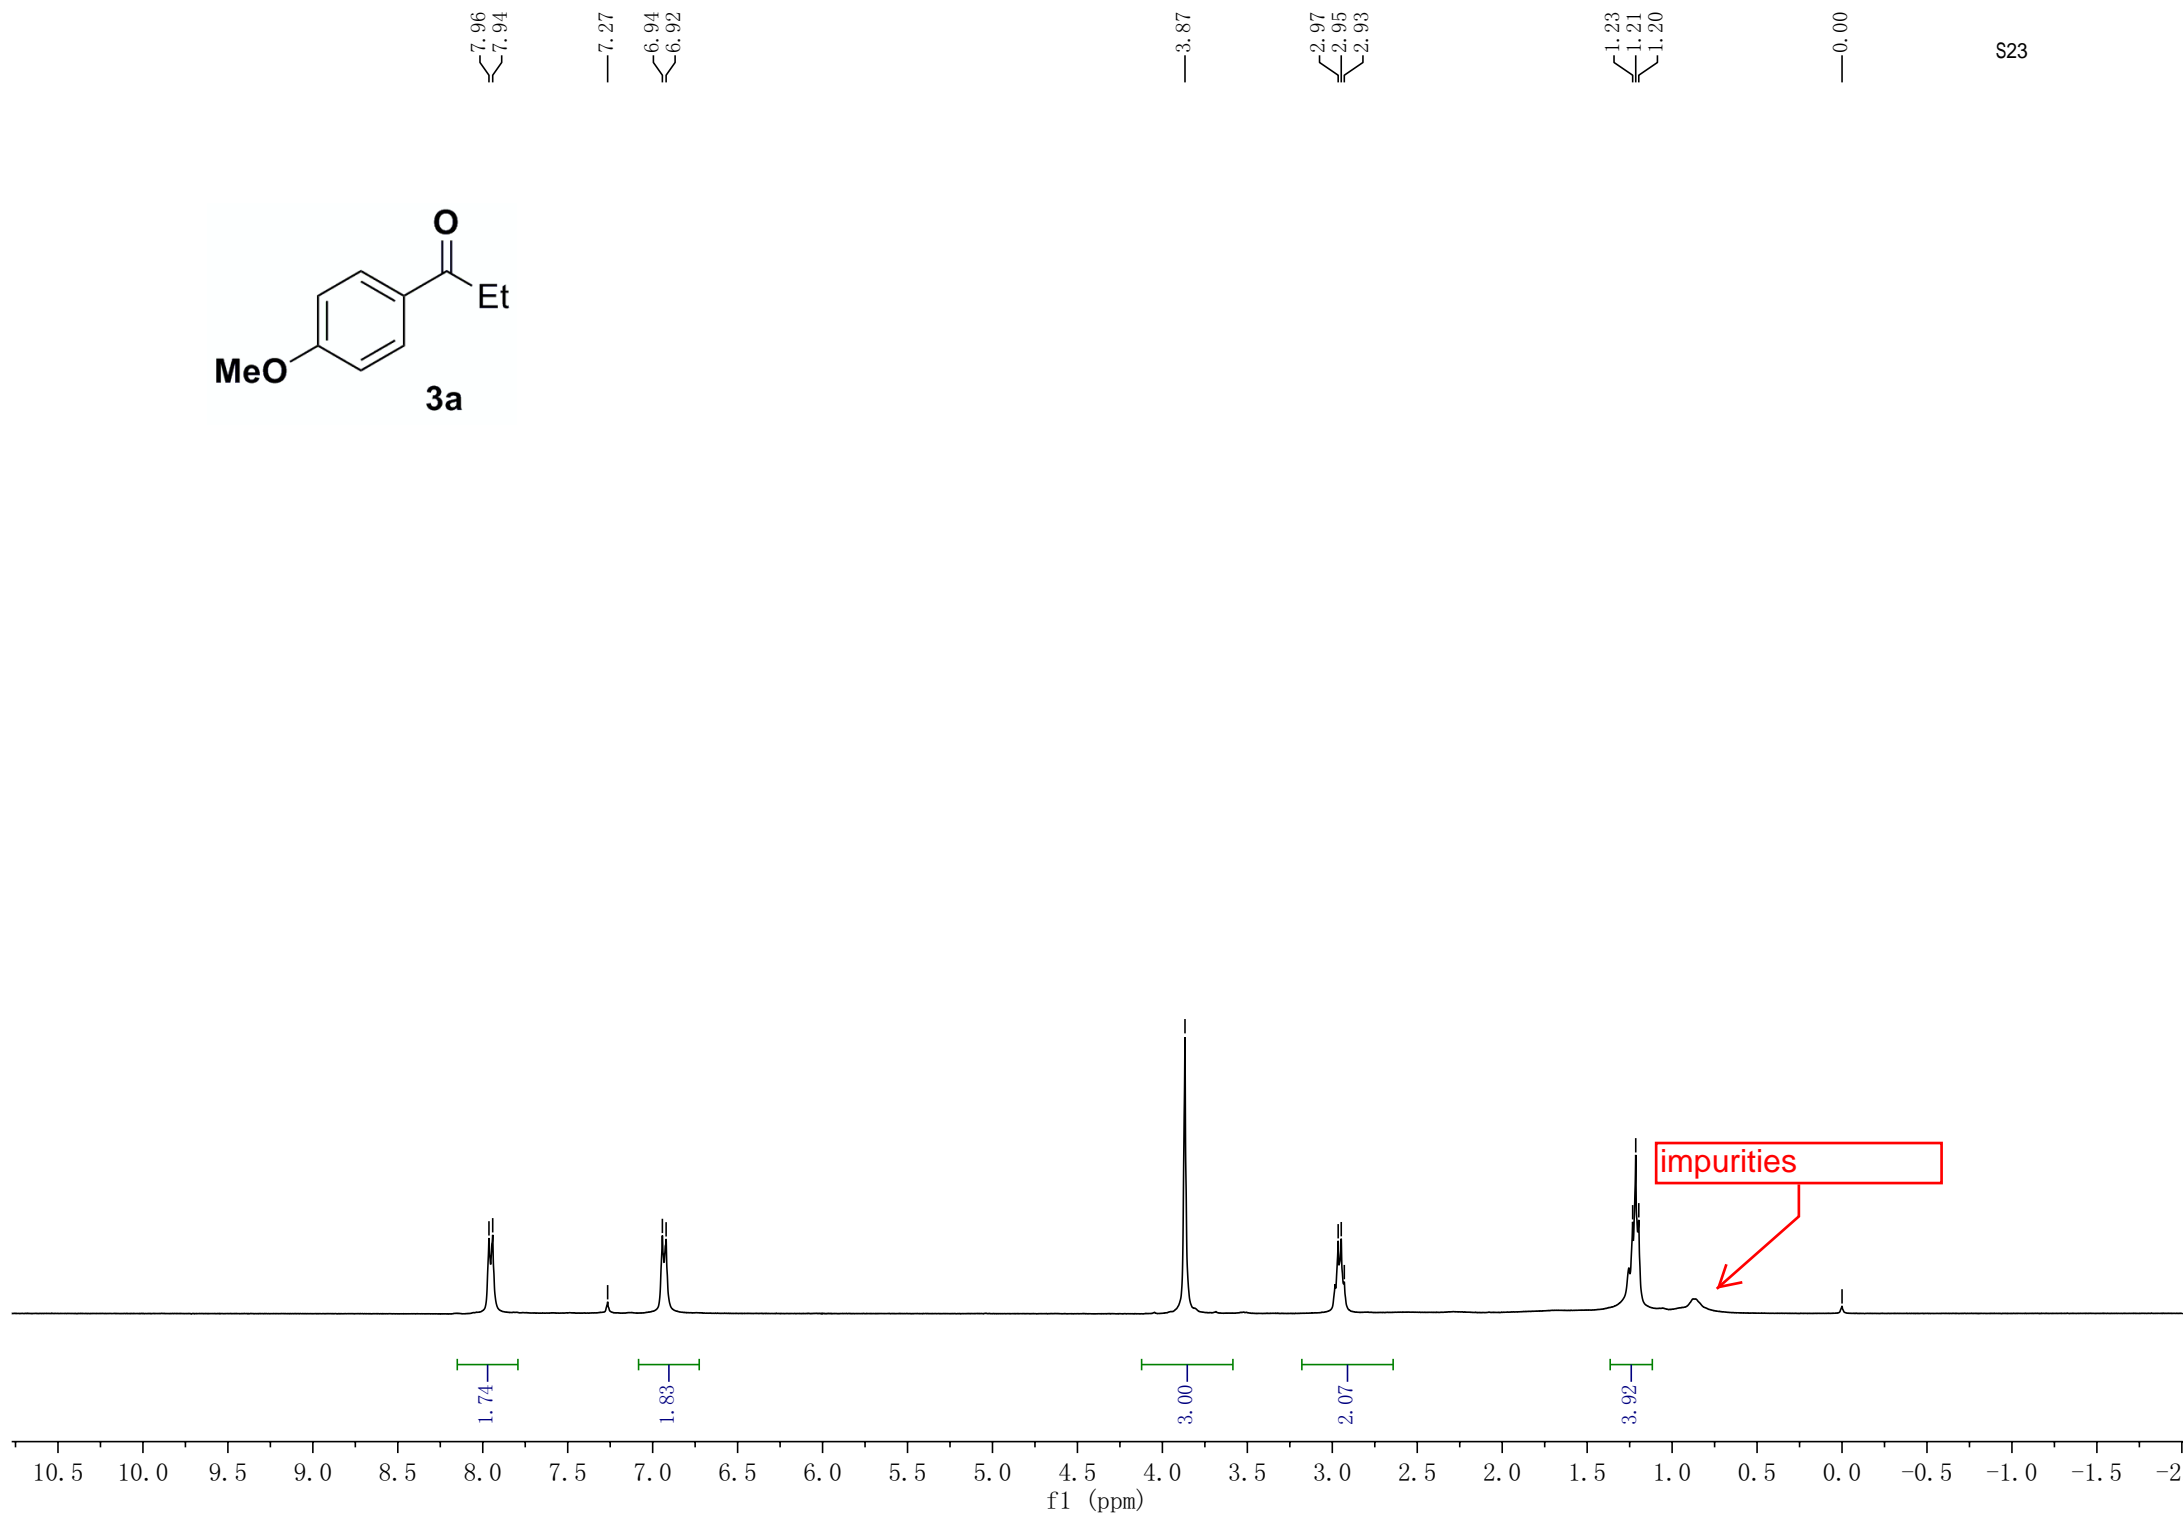

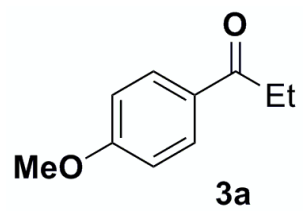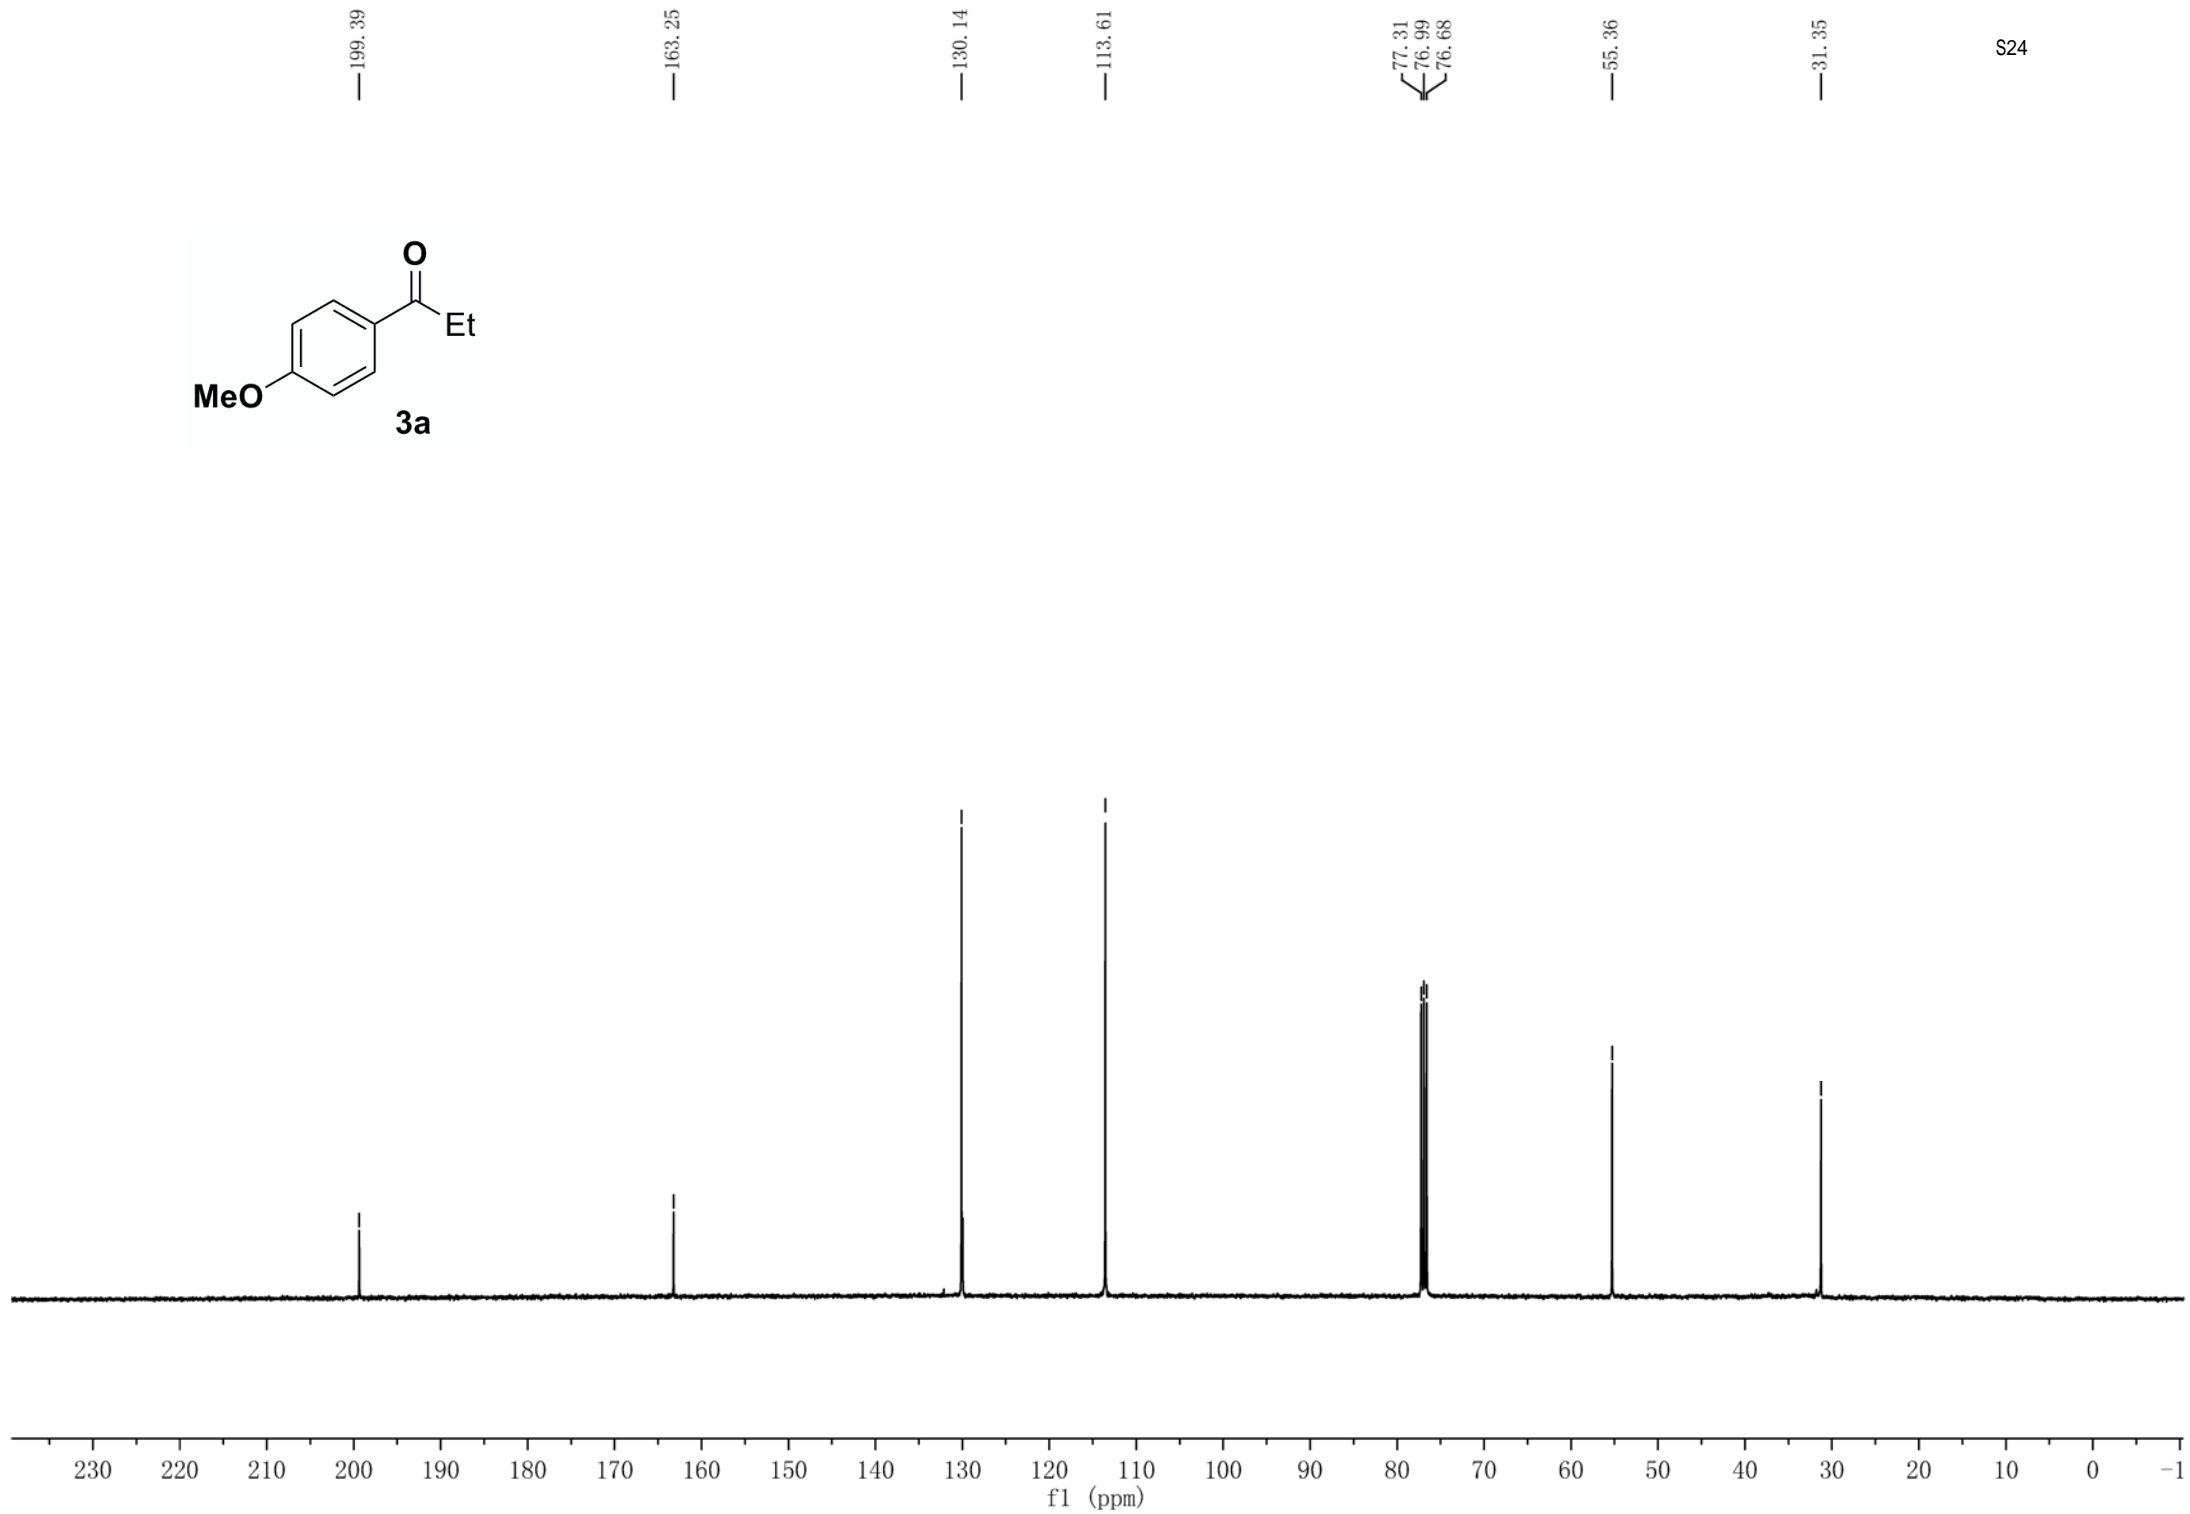

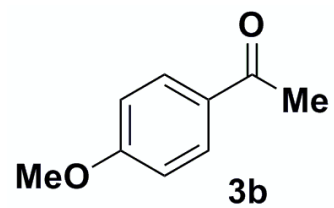

7.96  
7.95  
7.94  
7.93  
7.93

7.26  
6.95  
6.94  
6.93  
6.93  
6.92

3.88  
3.87  
3.86

2.56  
2.56  
2.55

1.60

0.00

S25

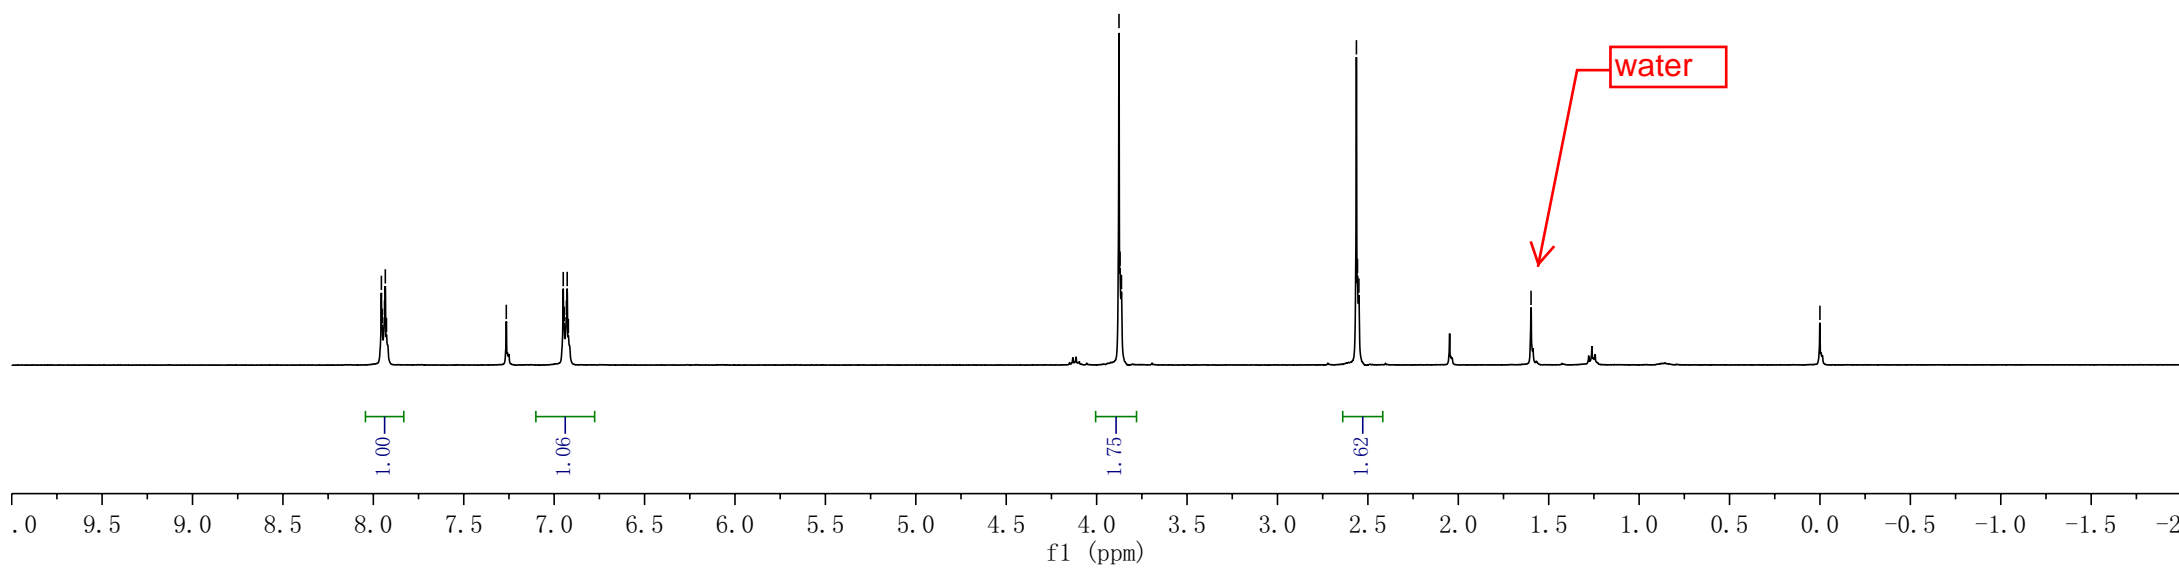

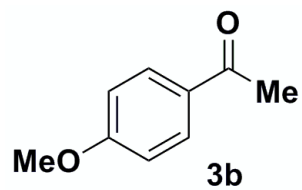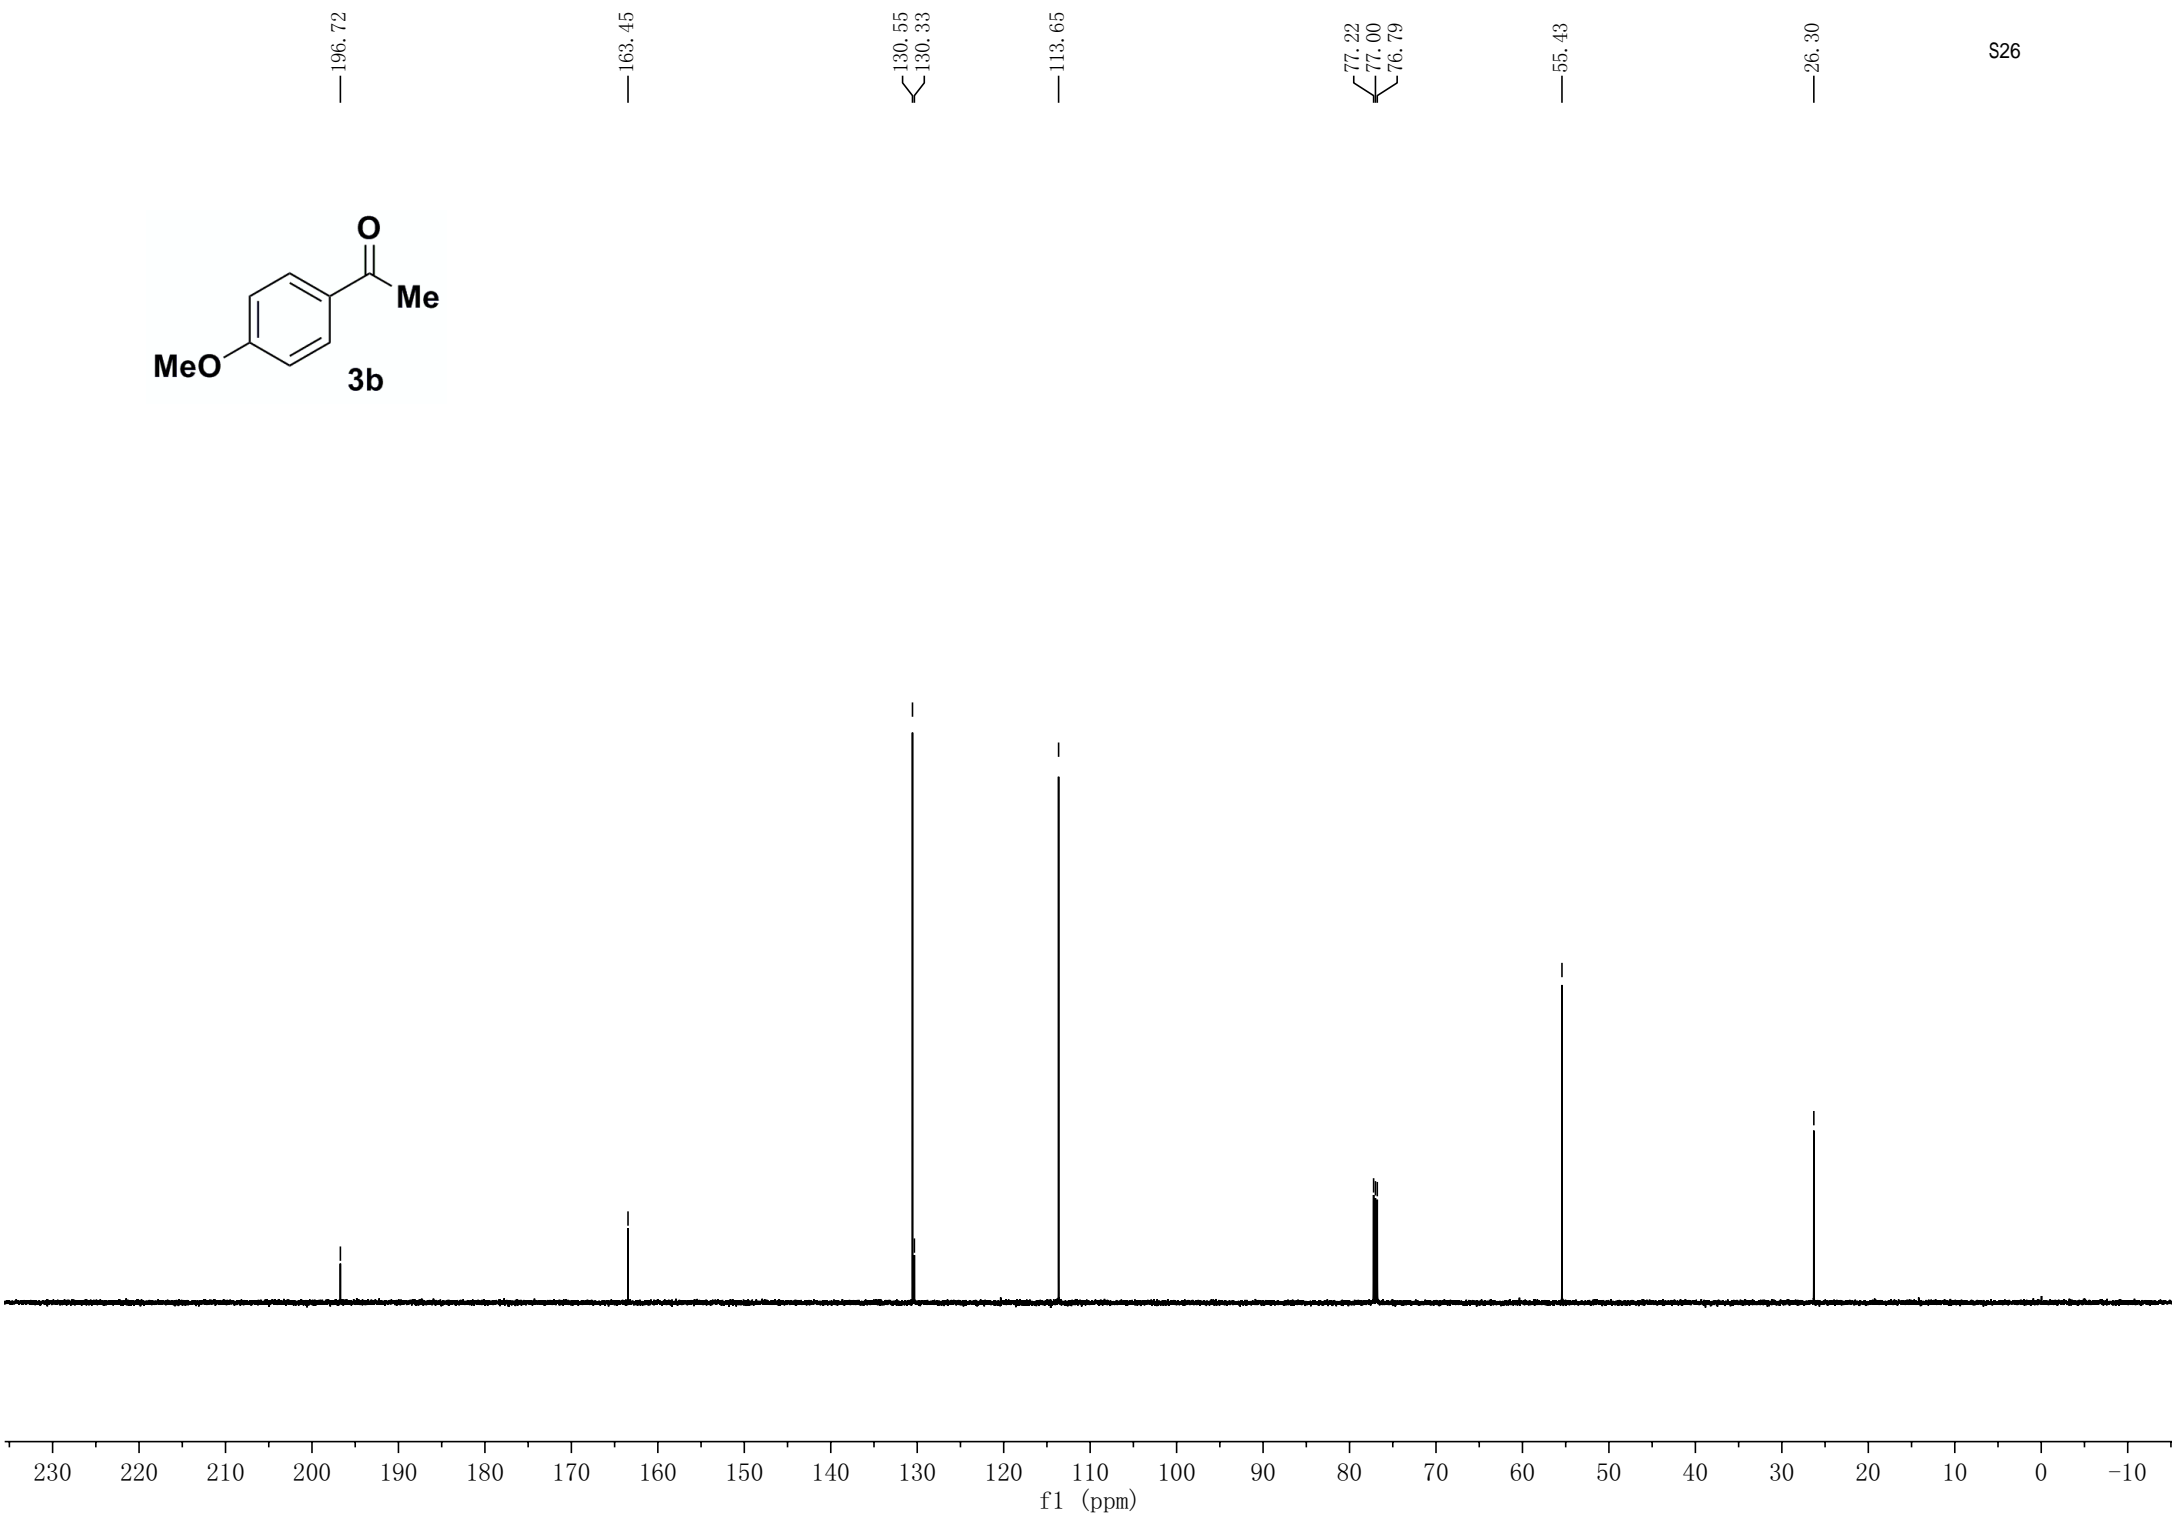

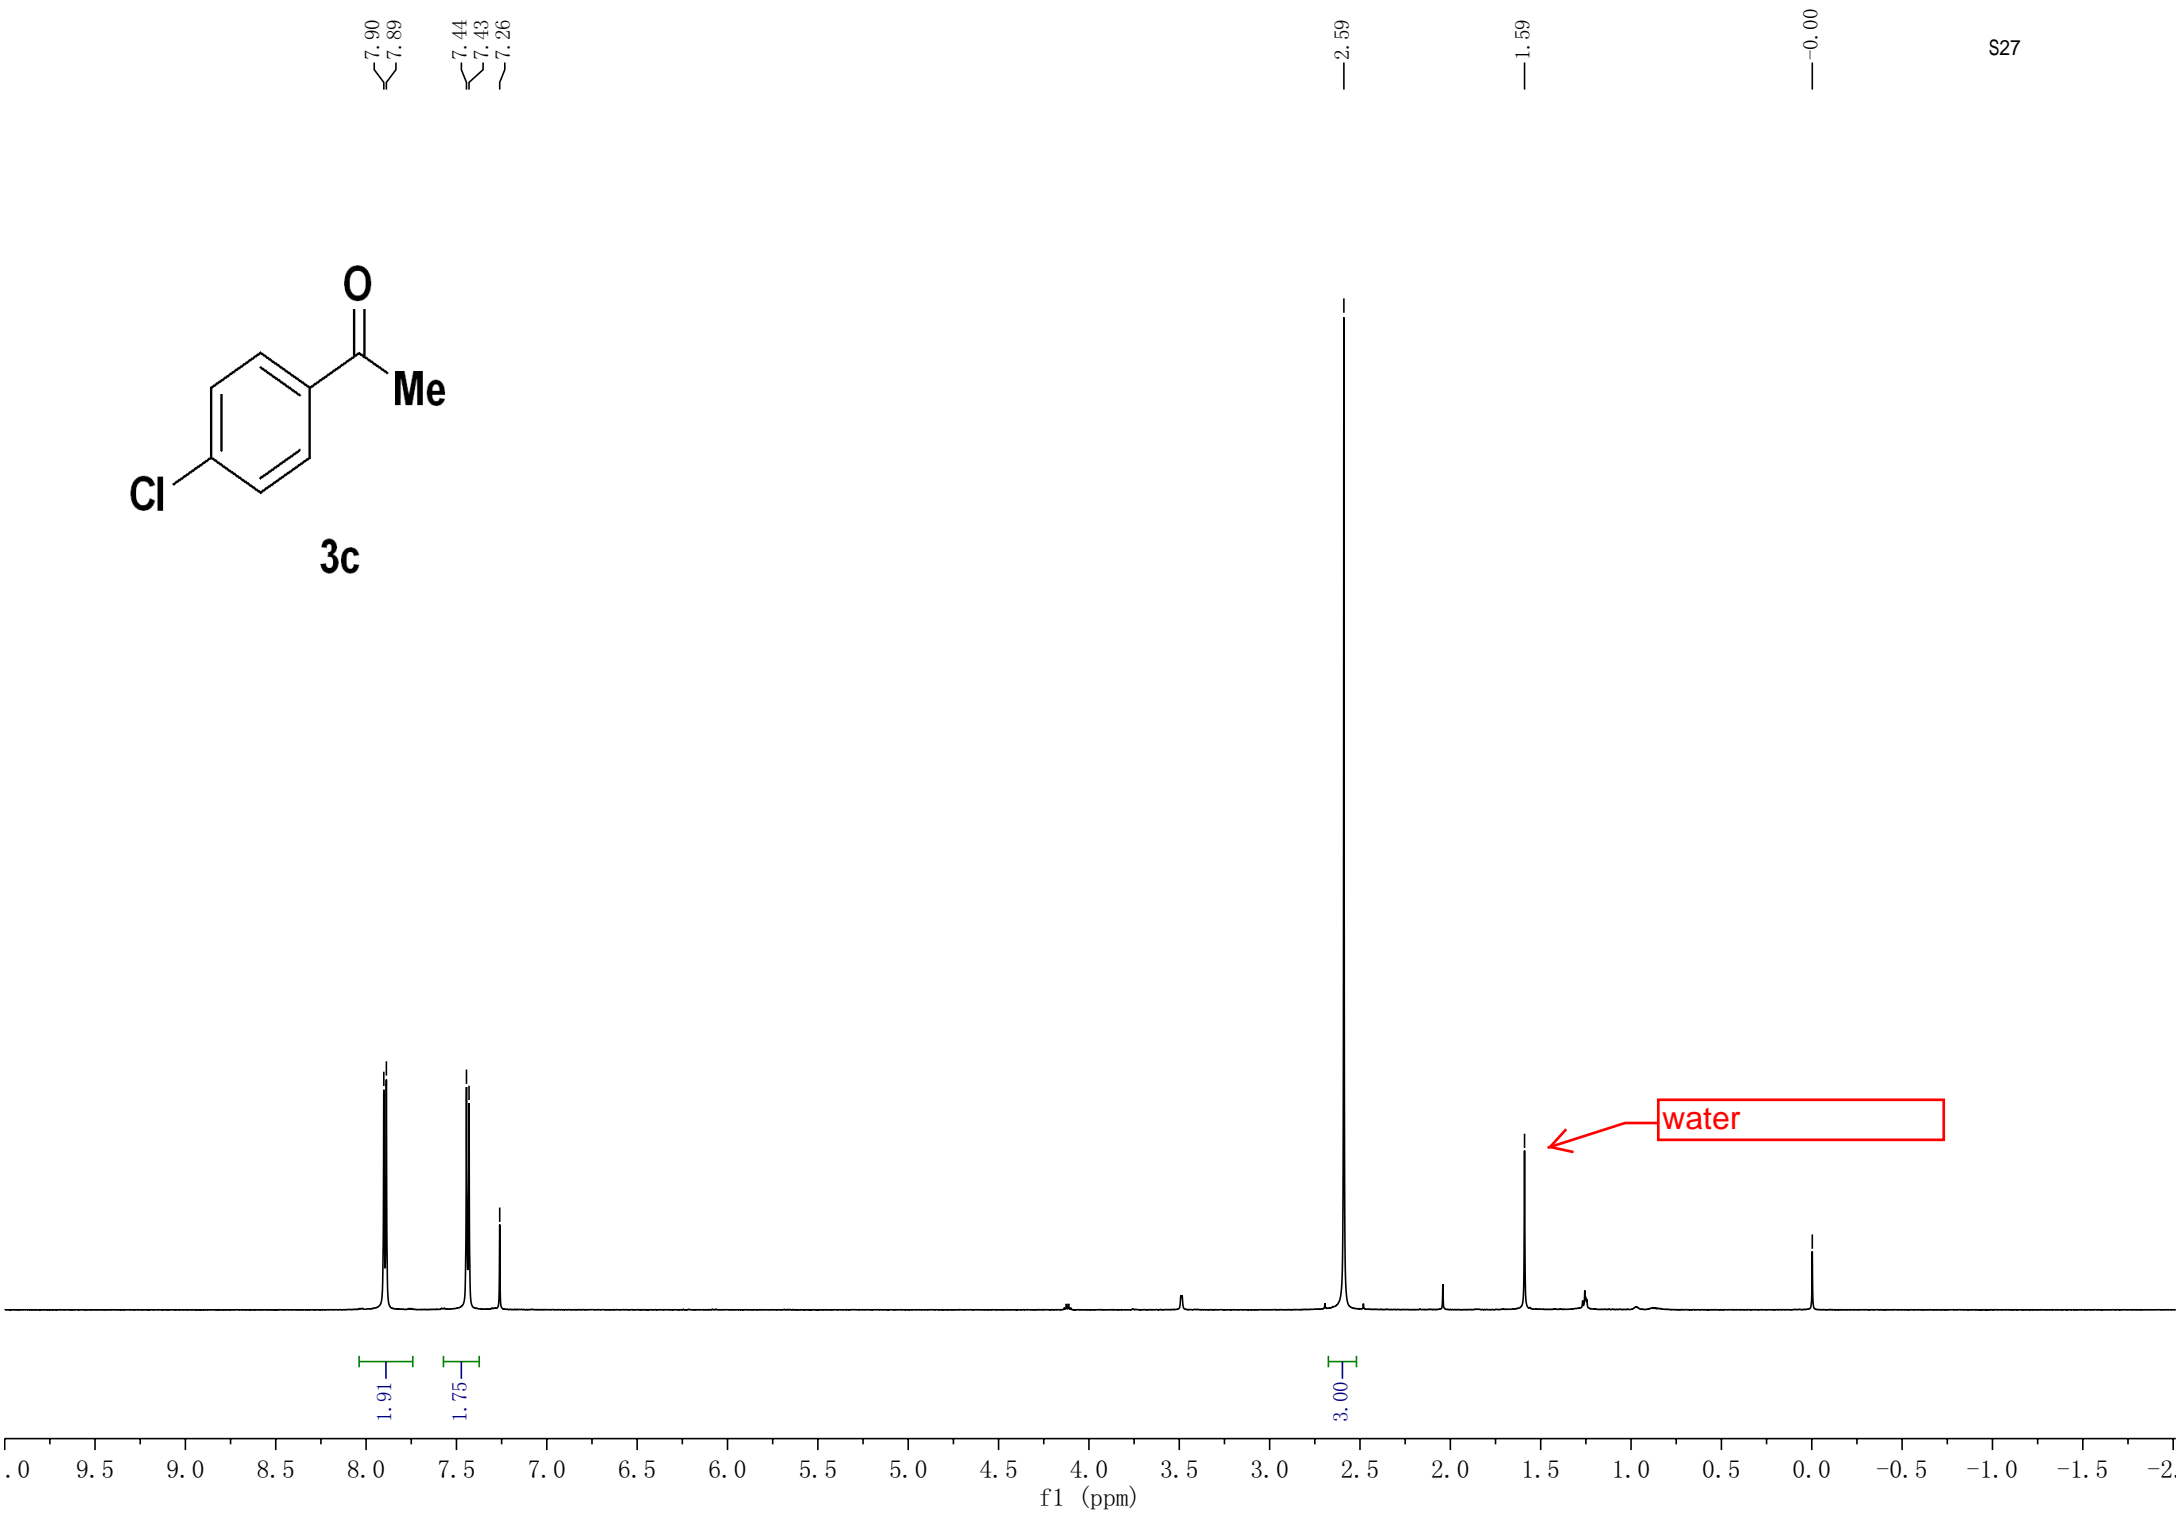

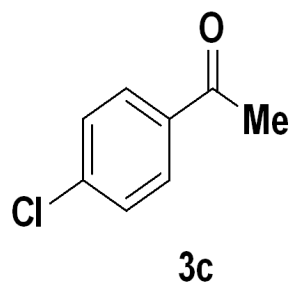

—196.75

—139.52

—135.41

129.69

128.85

77.23

77.02

76.81

—26.51

S28

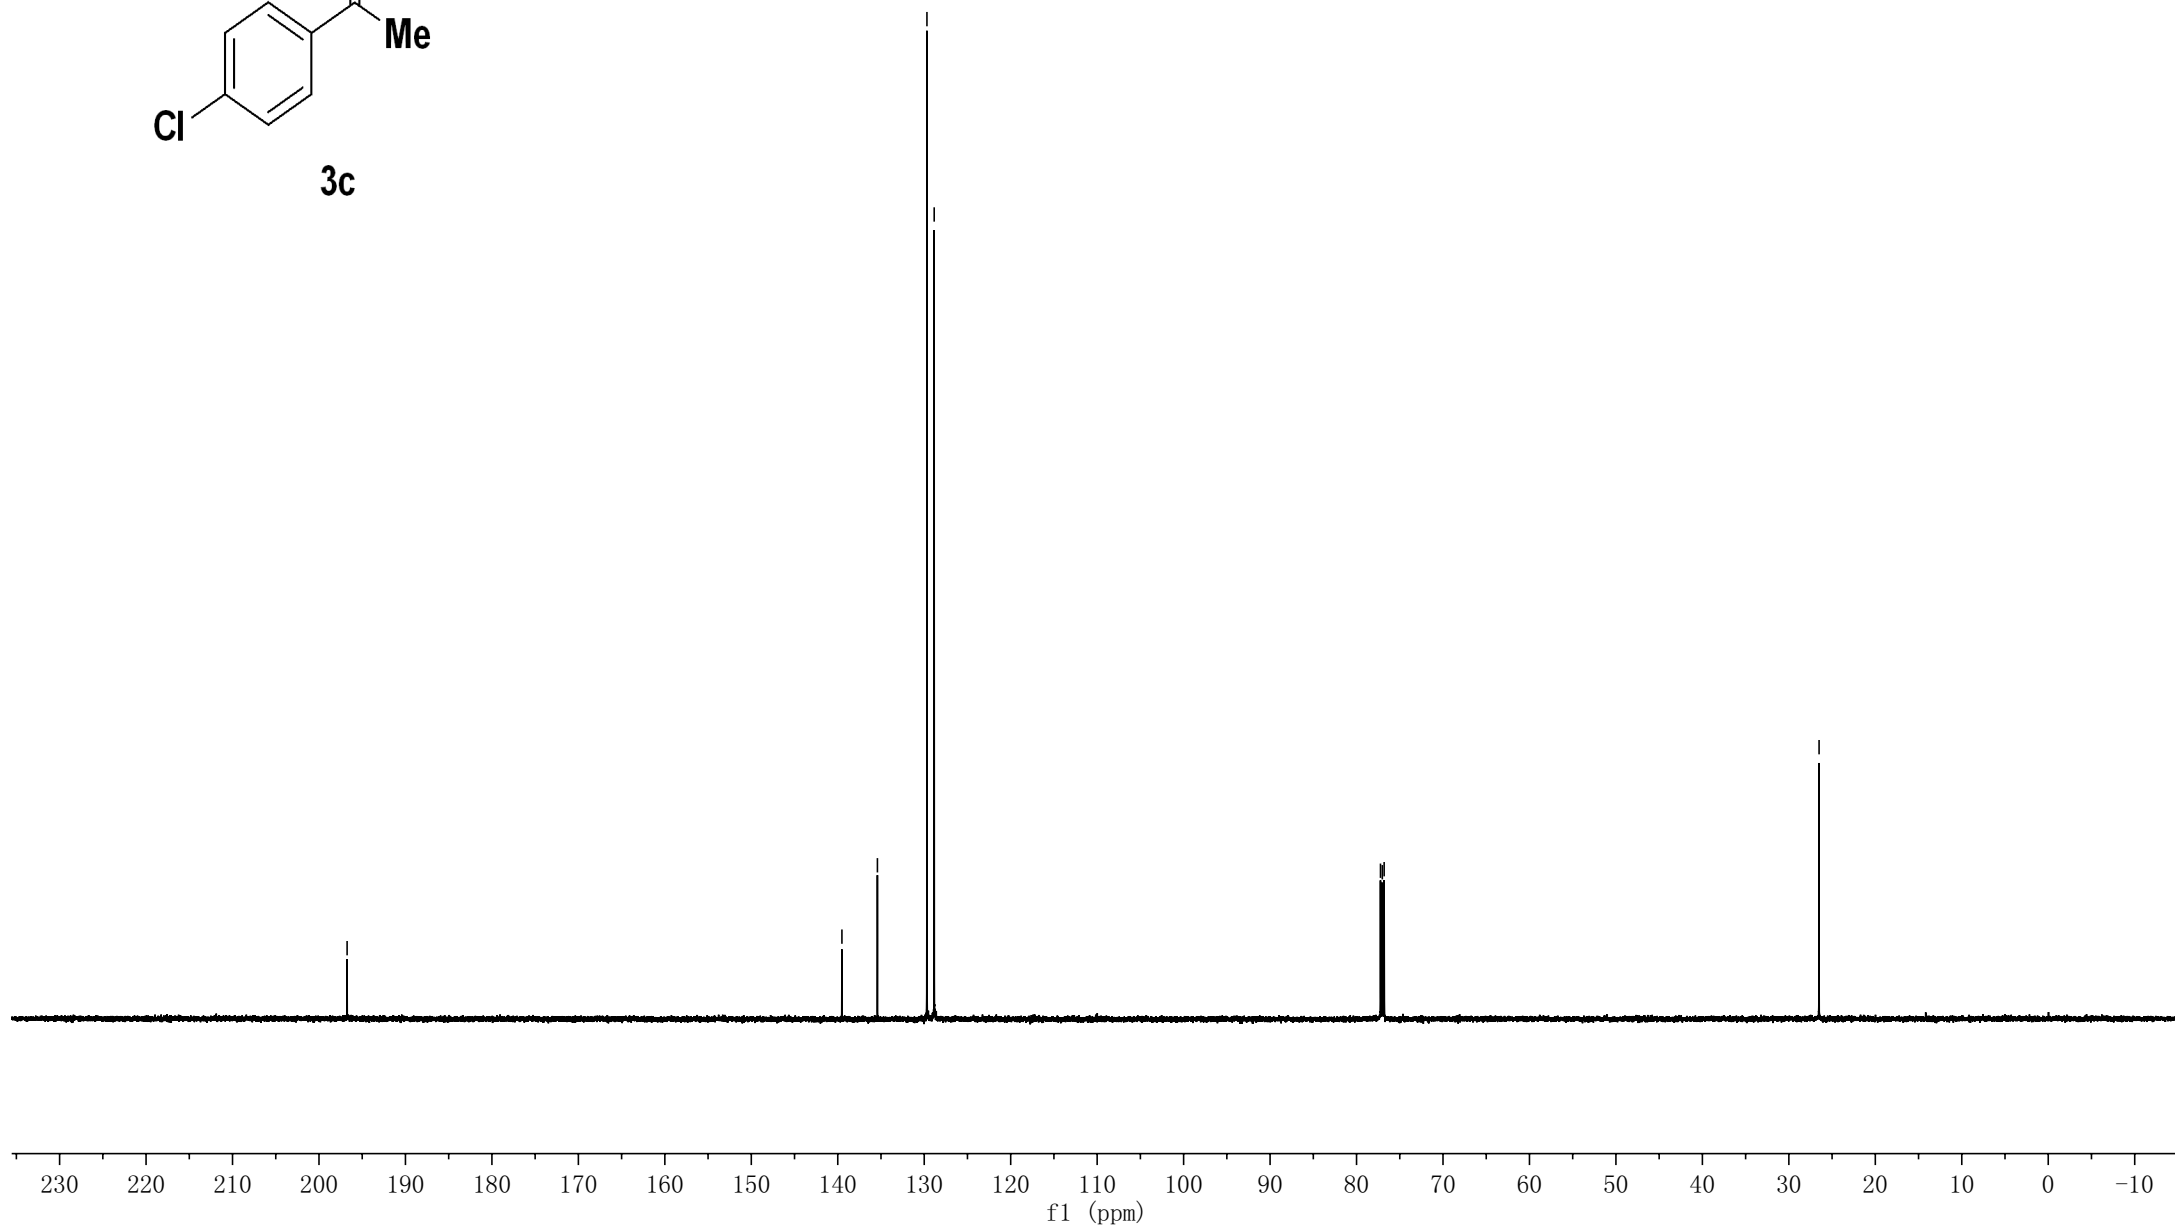

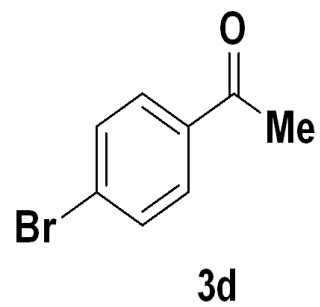

7.83  
7.81  
7.62  
7.60  
— 7.26

— 2.59

— 1.56

— -0.00

S29

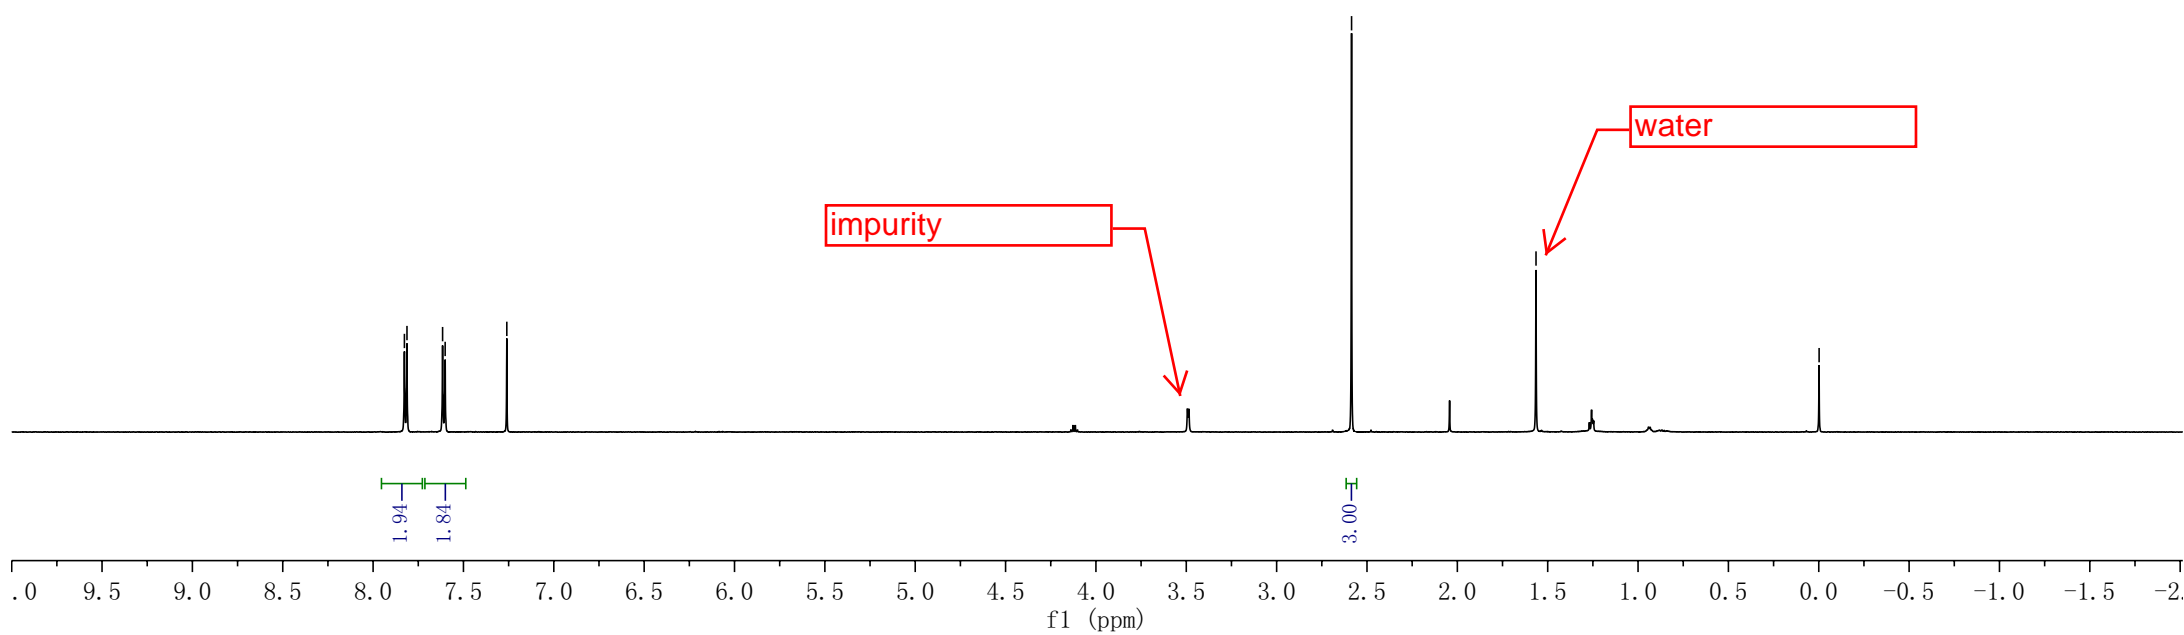

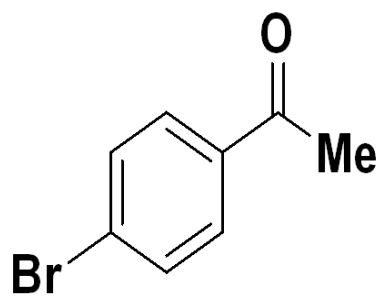

3d

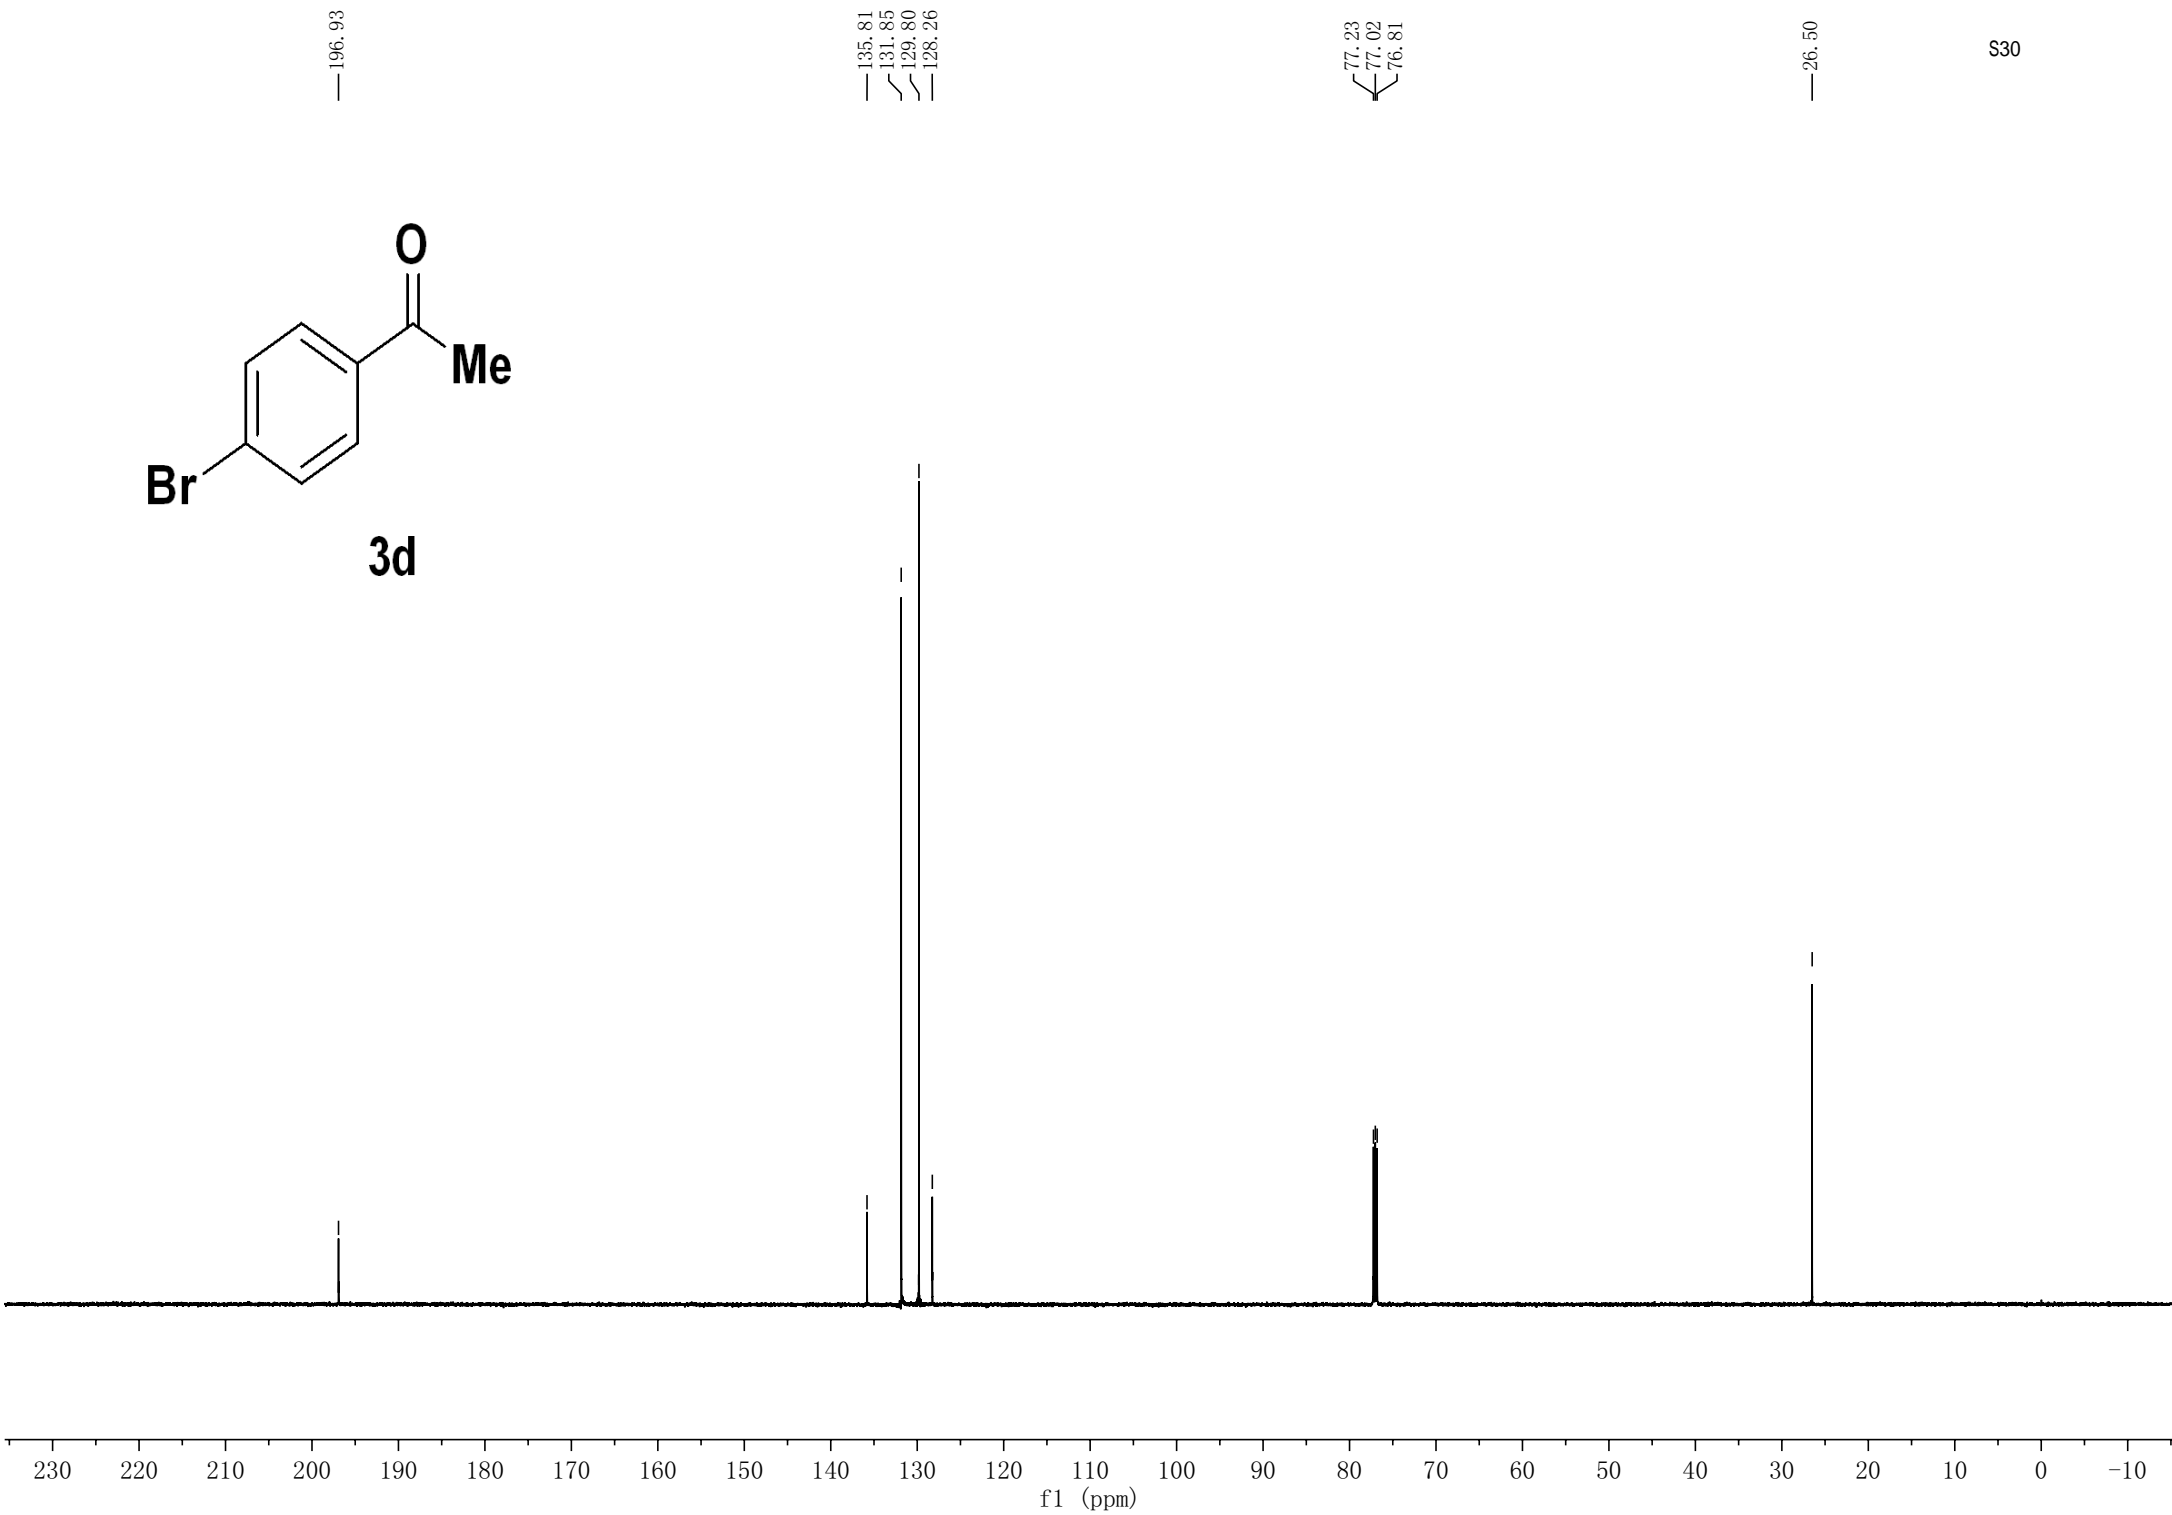

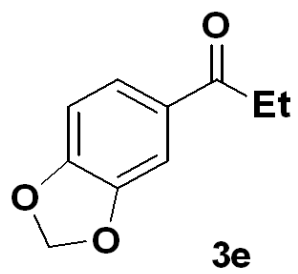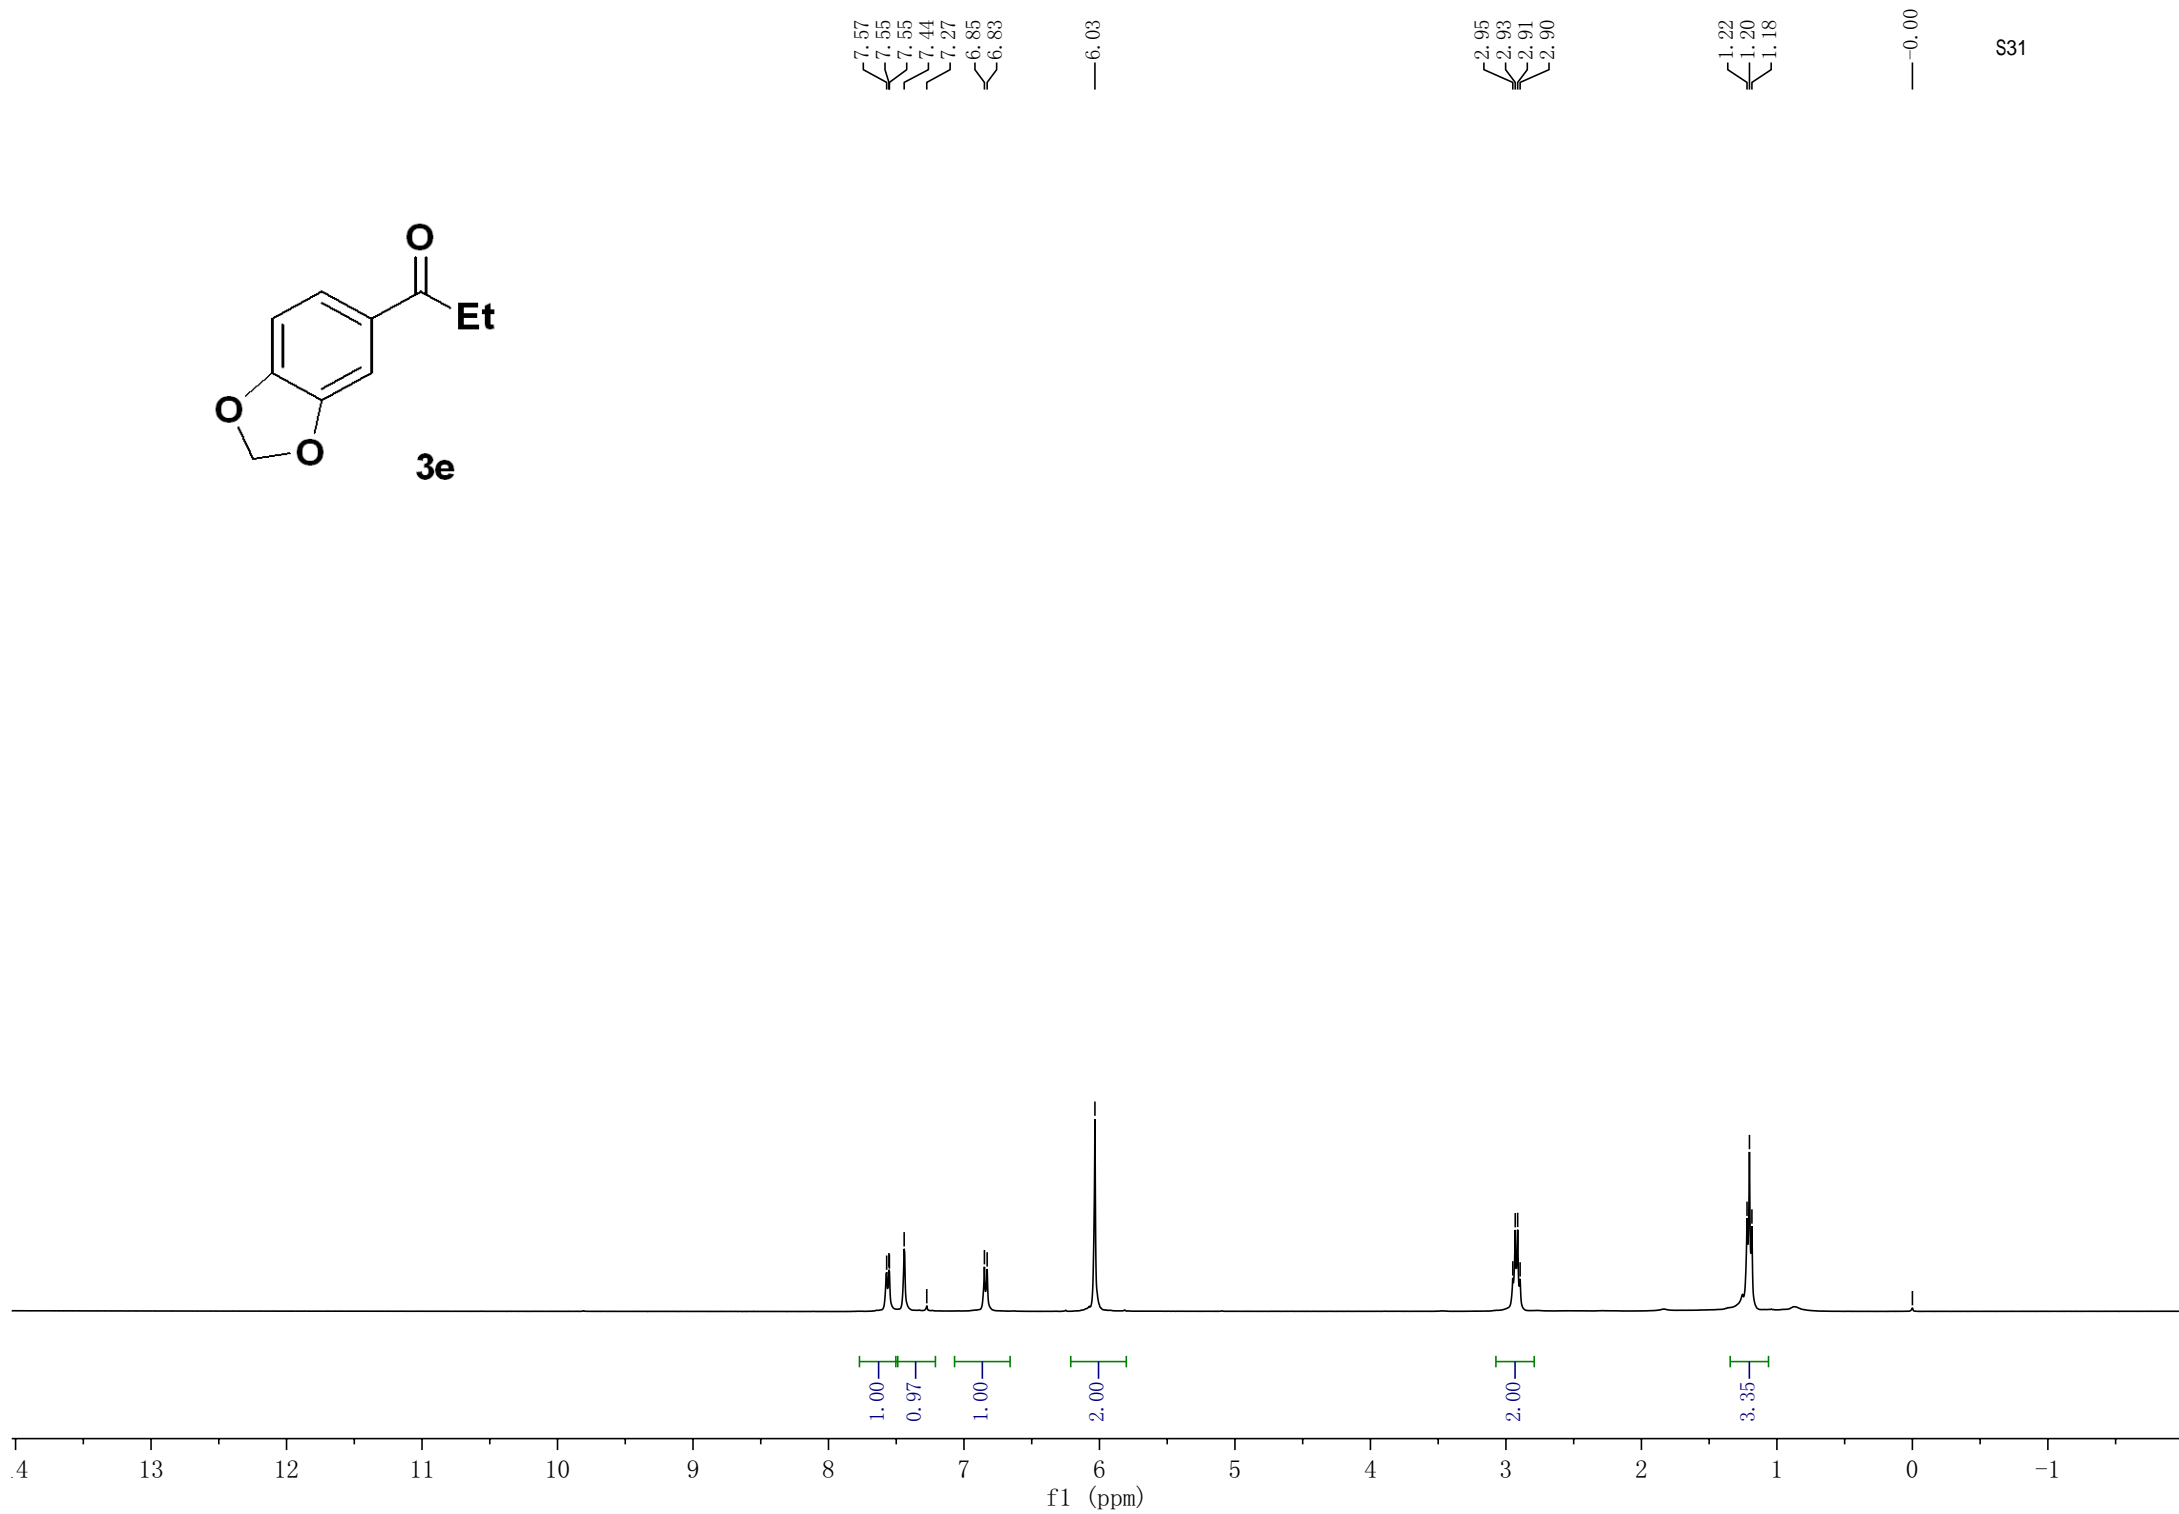

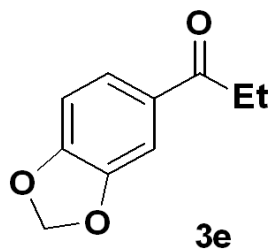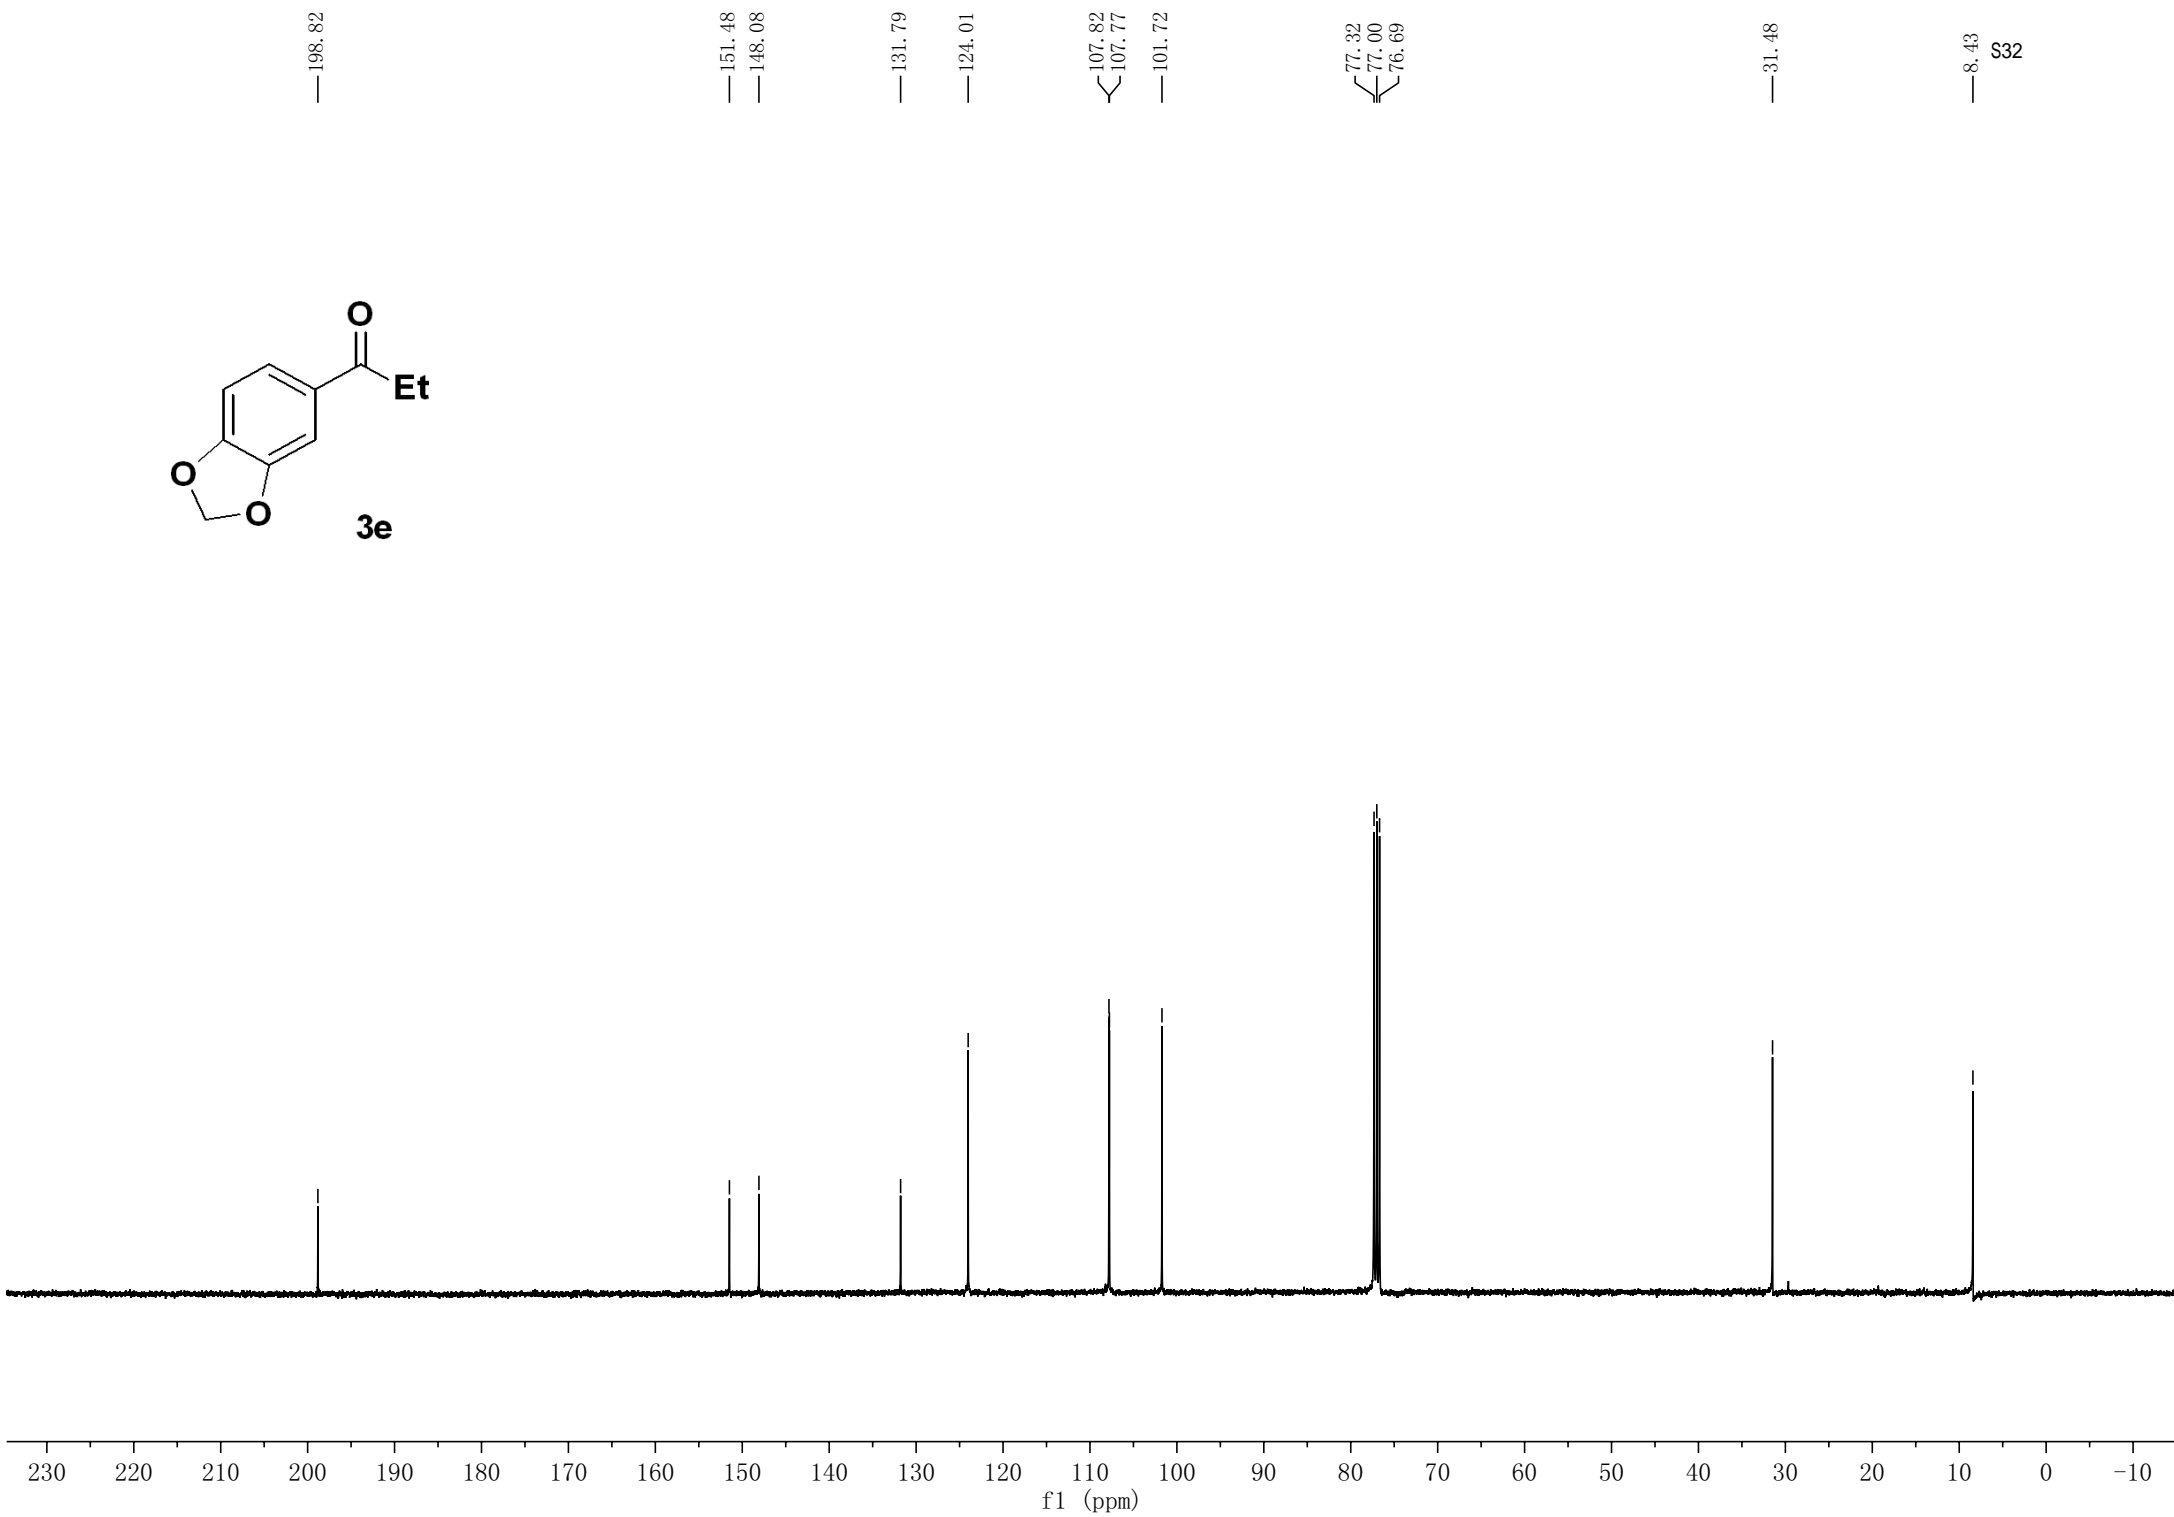

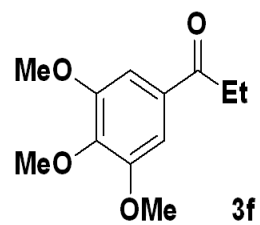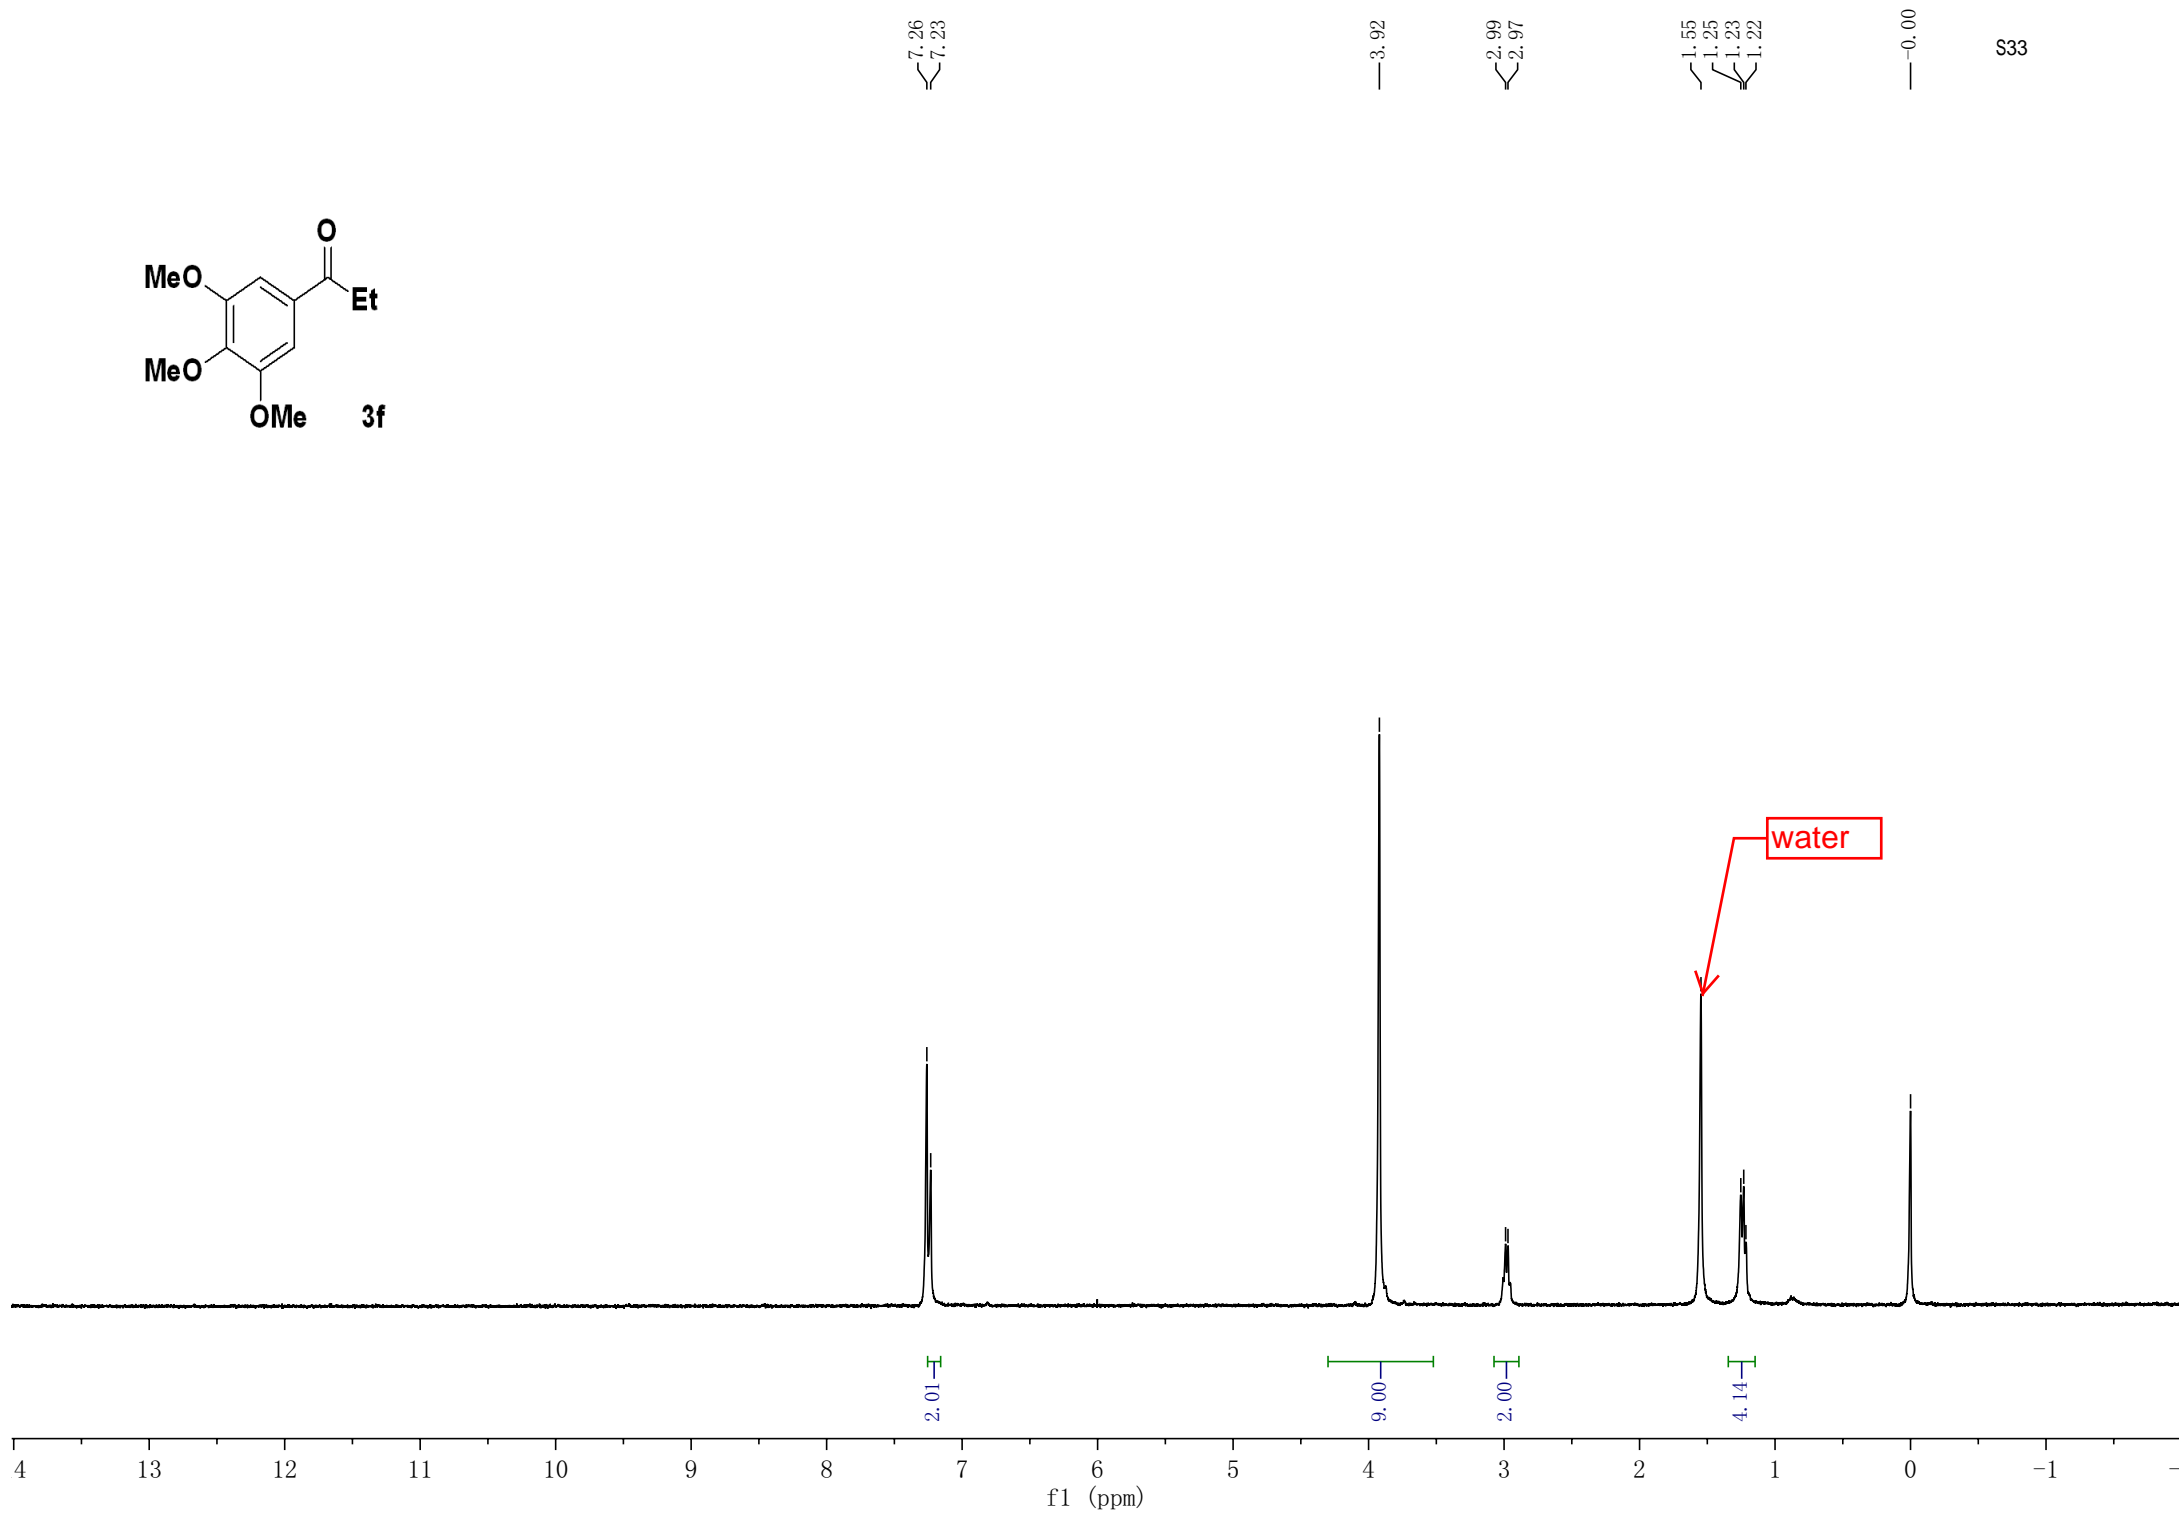

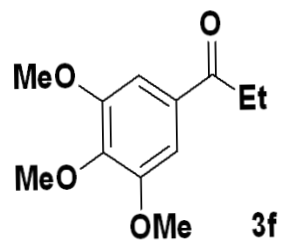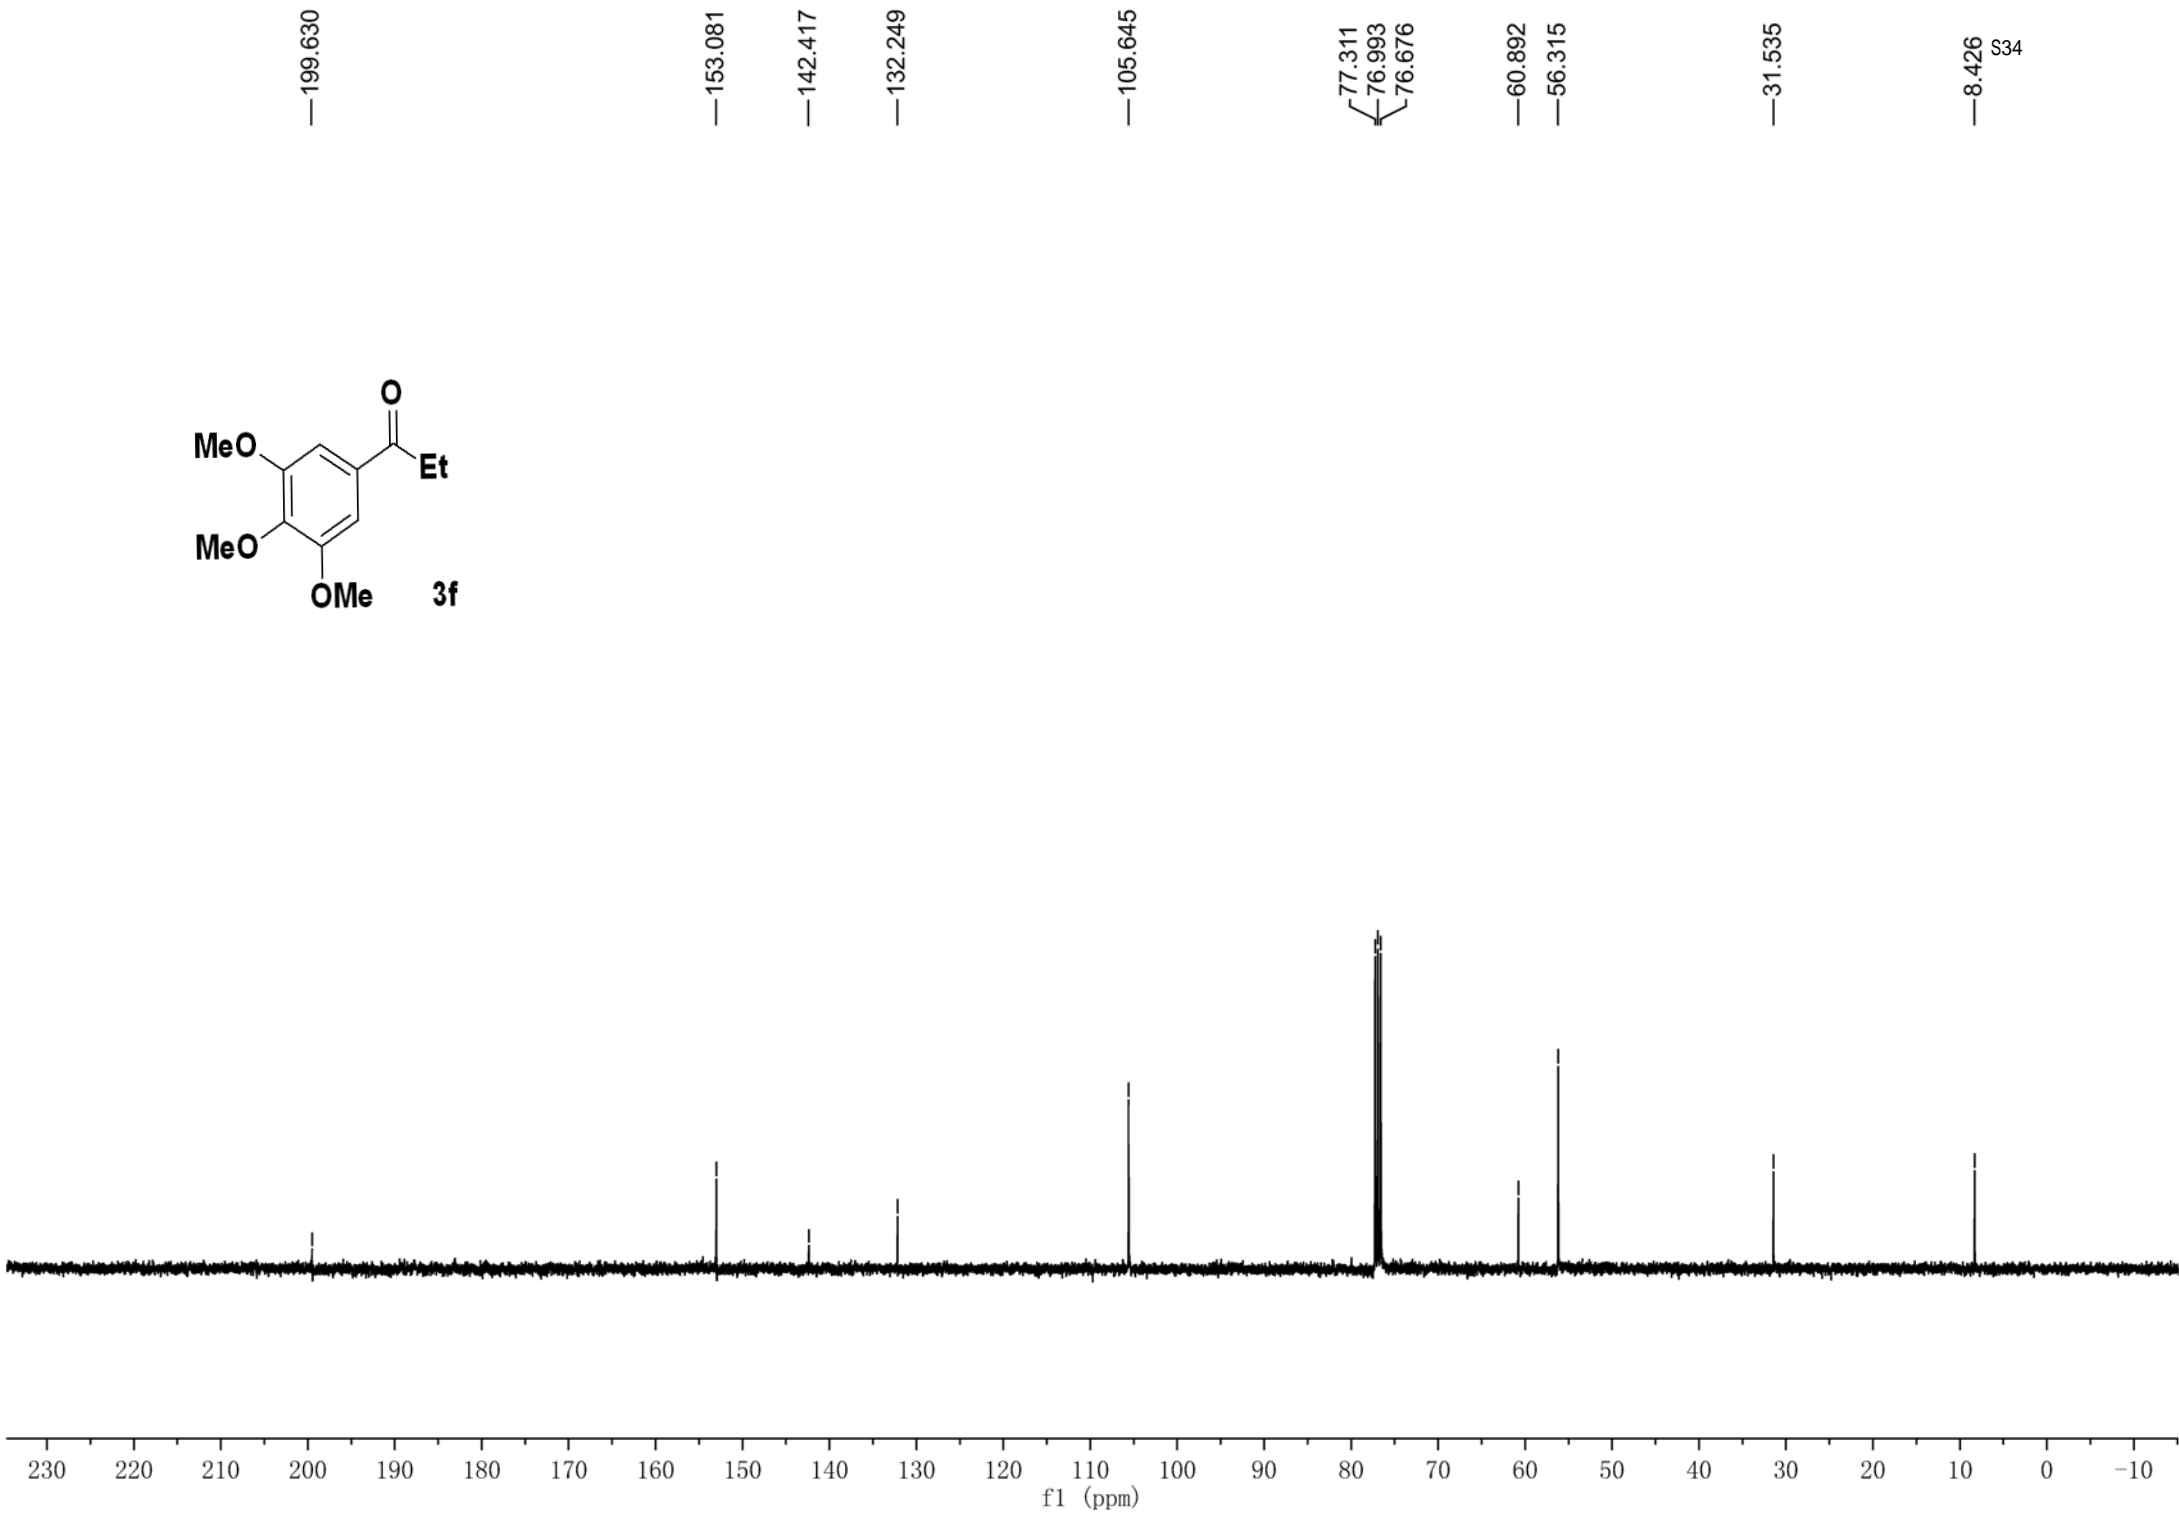

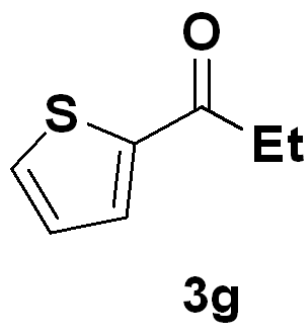

7.72  
 7.72  
 7.71  
 7.62  
 7.61  
 7.27  
 7.26  
 7.14  
 7.13  
 7.11

2.95  
 2.94

1.26  
 1.24  
 1.22

0.00

S35

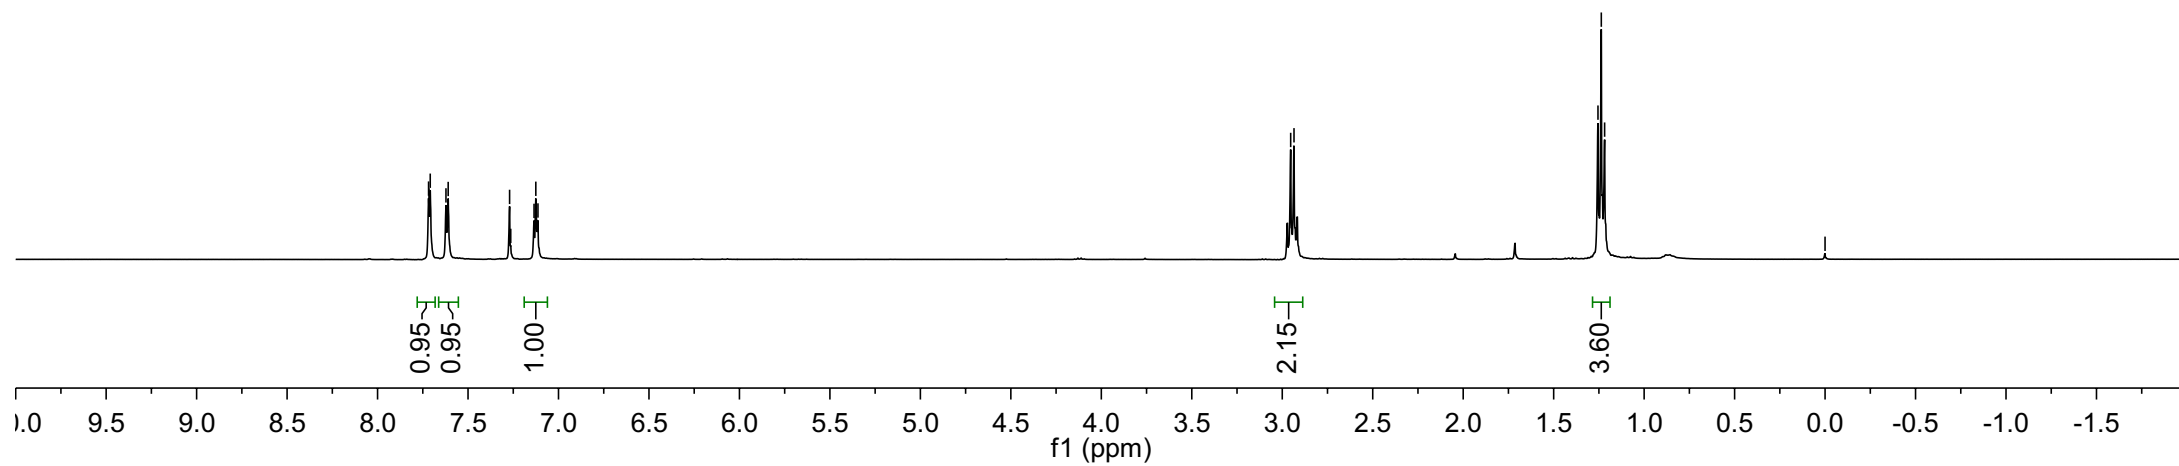

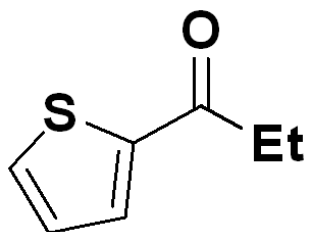

**3g**

—193.77

—144.12

133.12

131.48

127.96

127.95

77.21

77.00

76.79

—32.54

—8.49

S36

grease

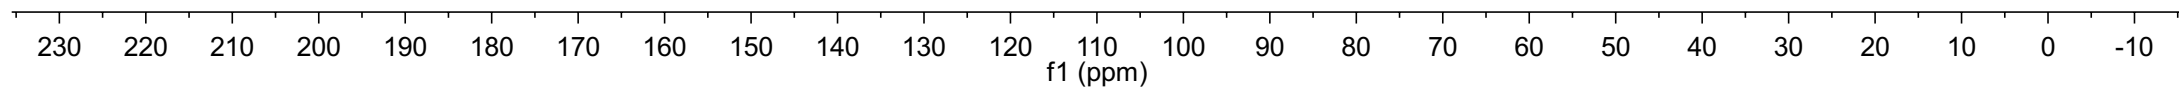

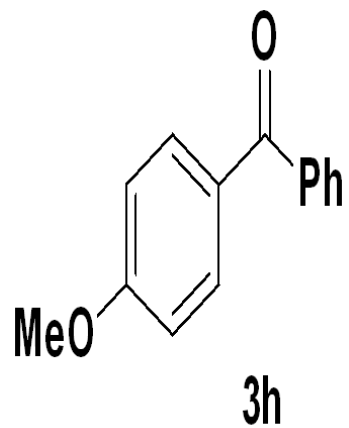

7.85  
 7.83  
 7.77  
 7.75  
 7.57  
 7.55  
 7.49  
 7.48  
 7.46  
 7.26  
 6.98  
 6.96

—3.89

—1.58

—0.00  
s37

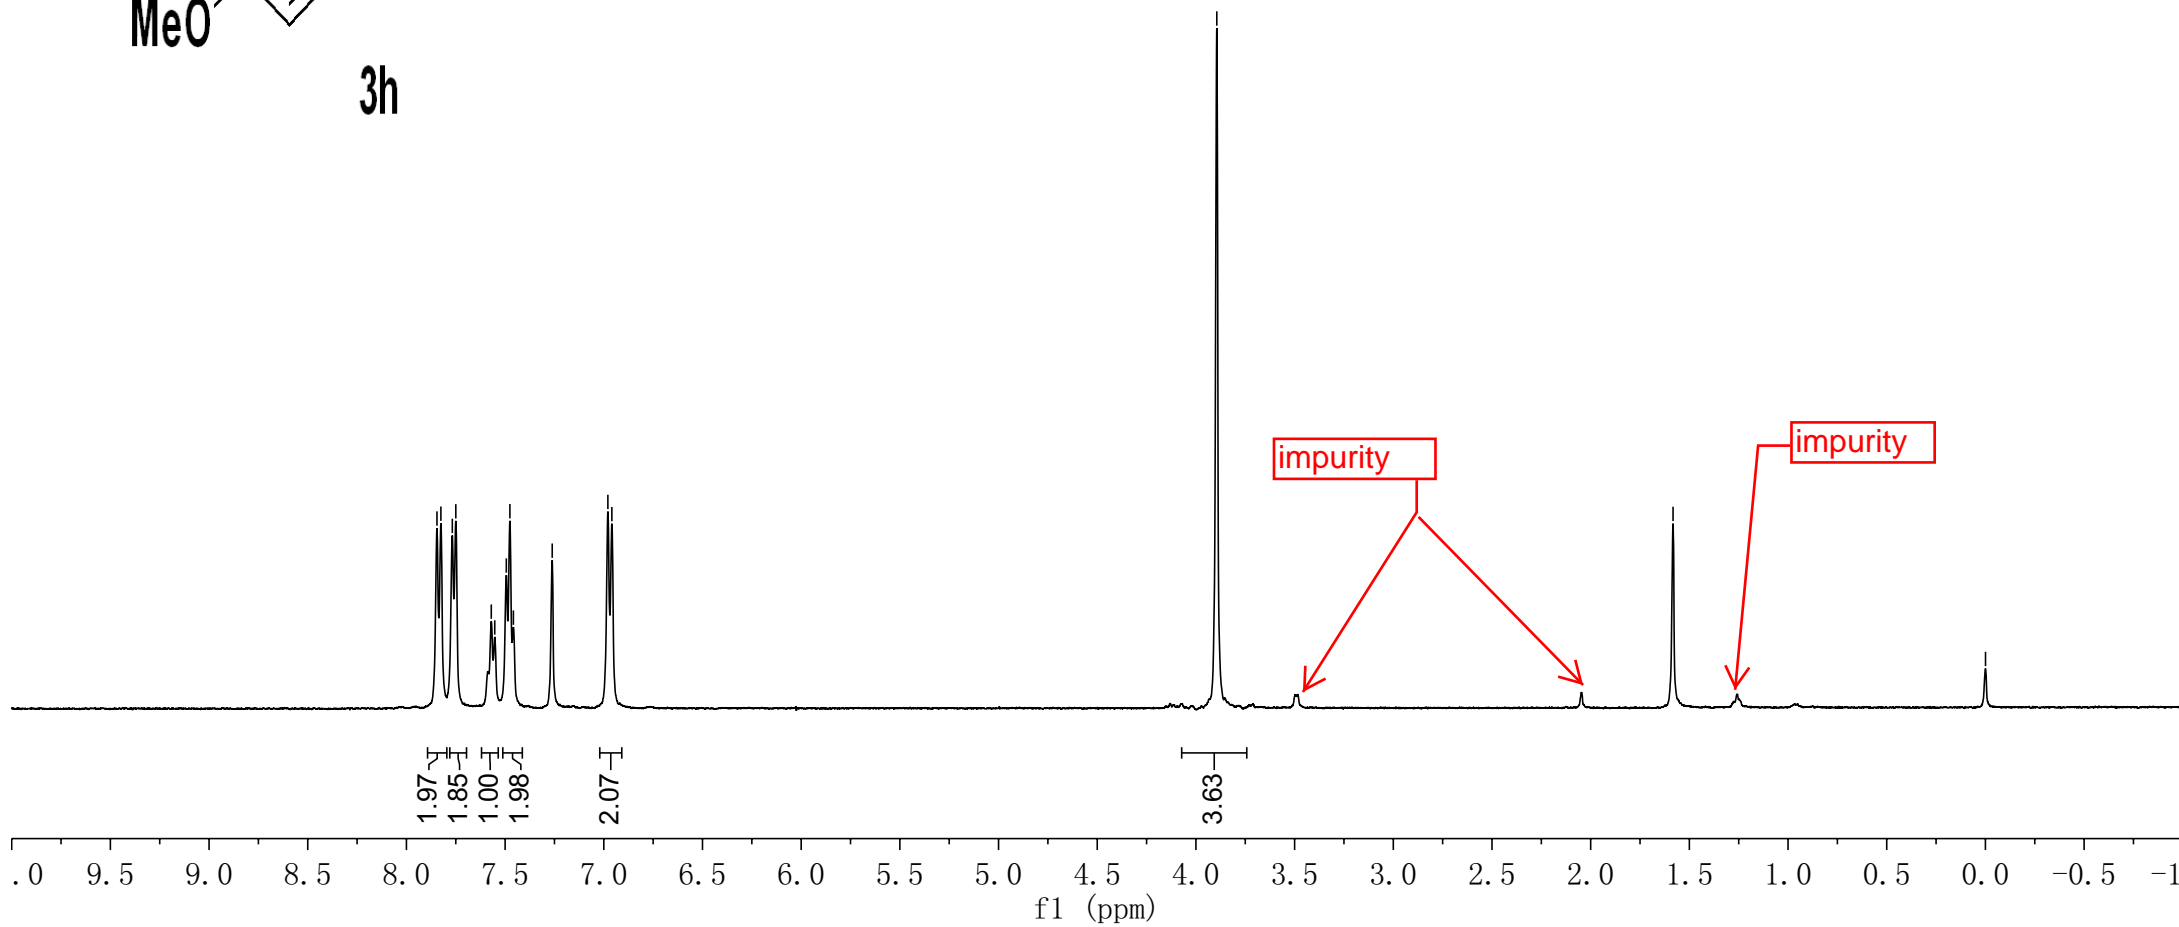

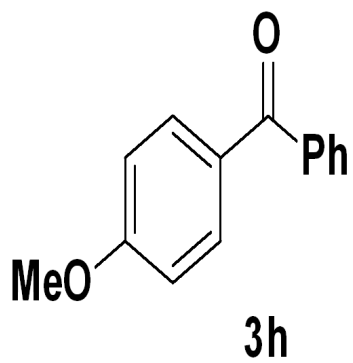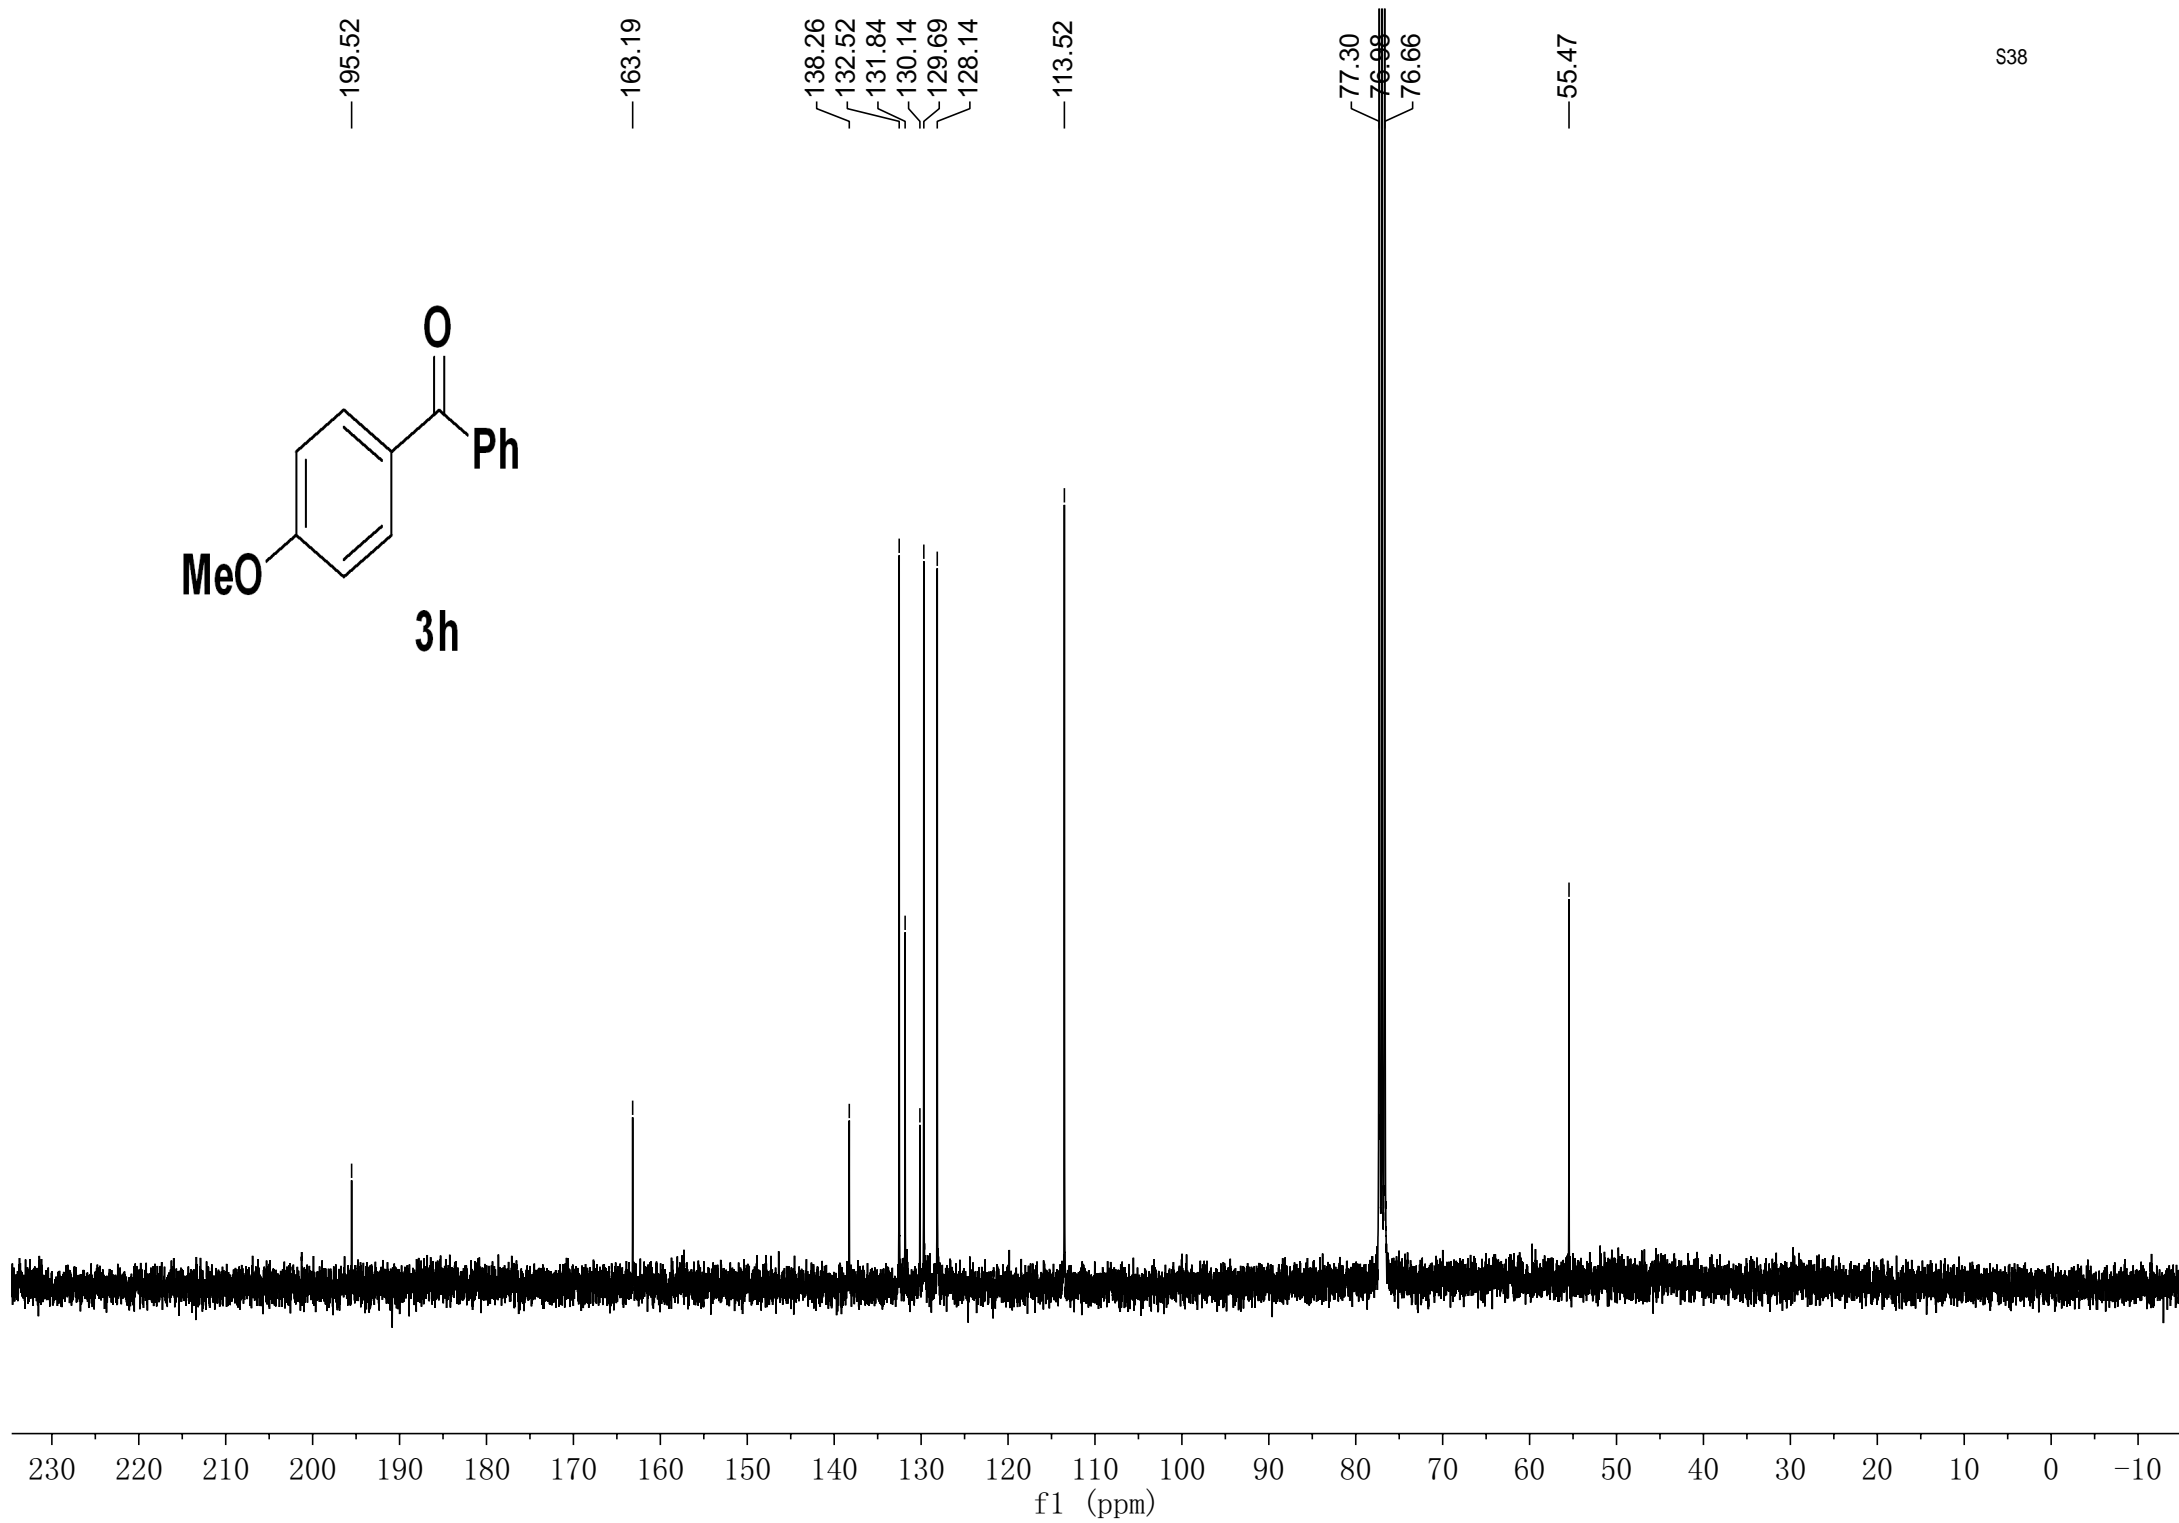

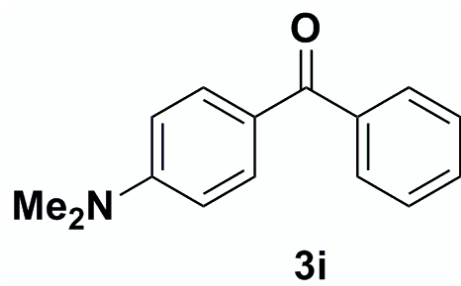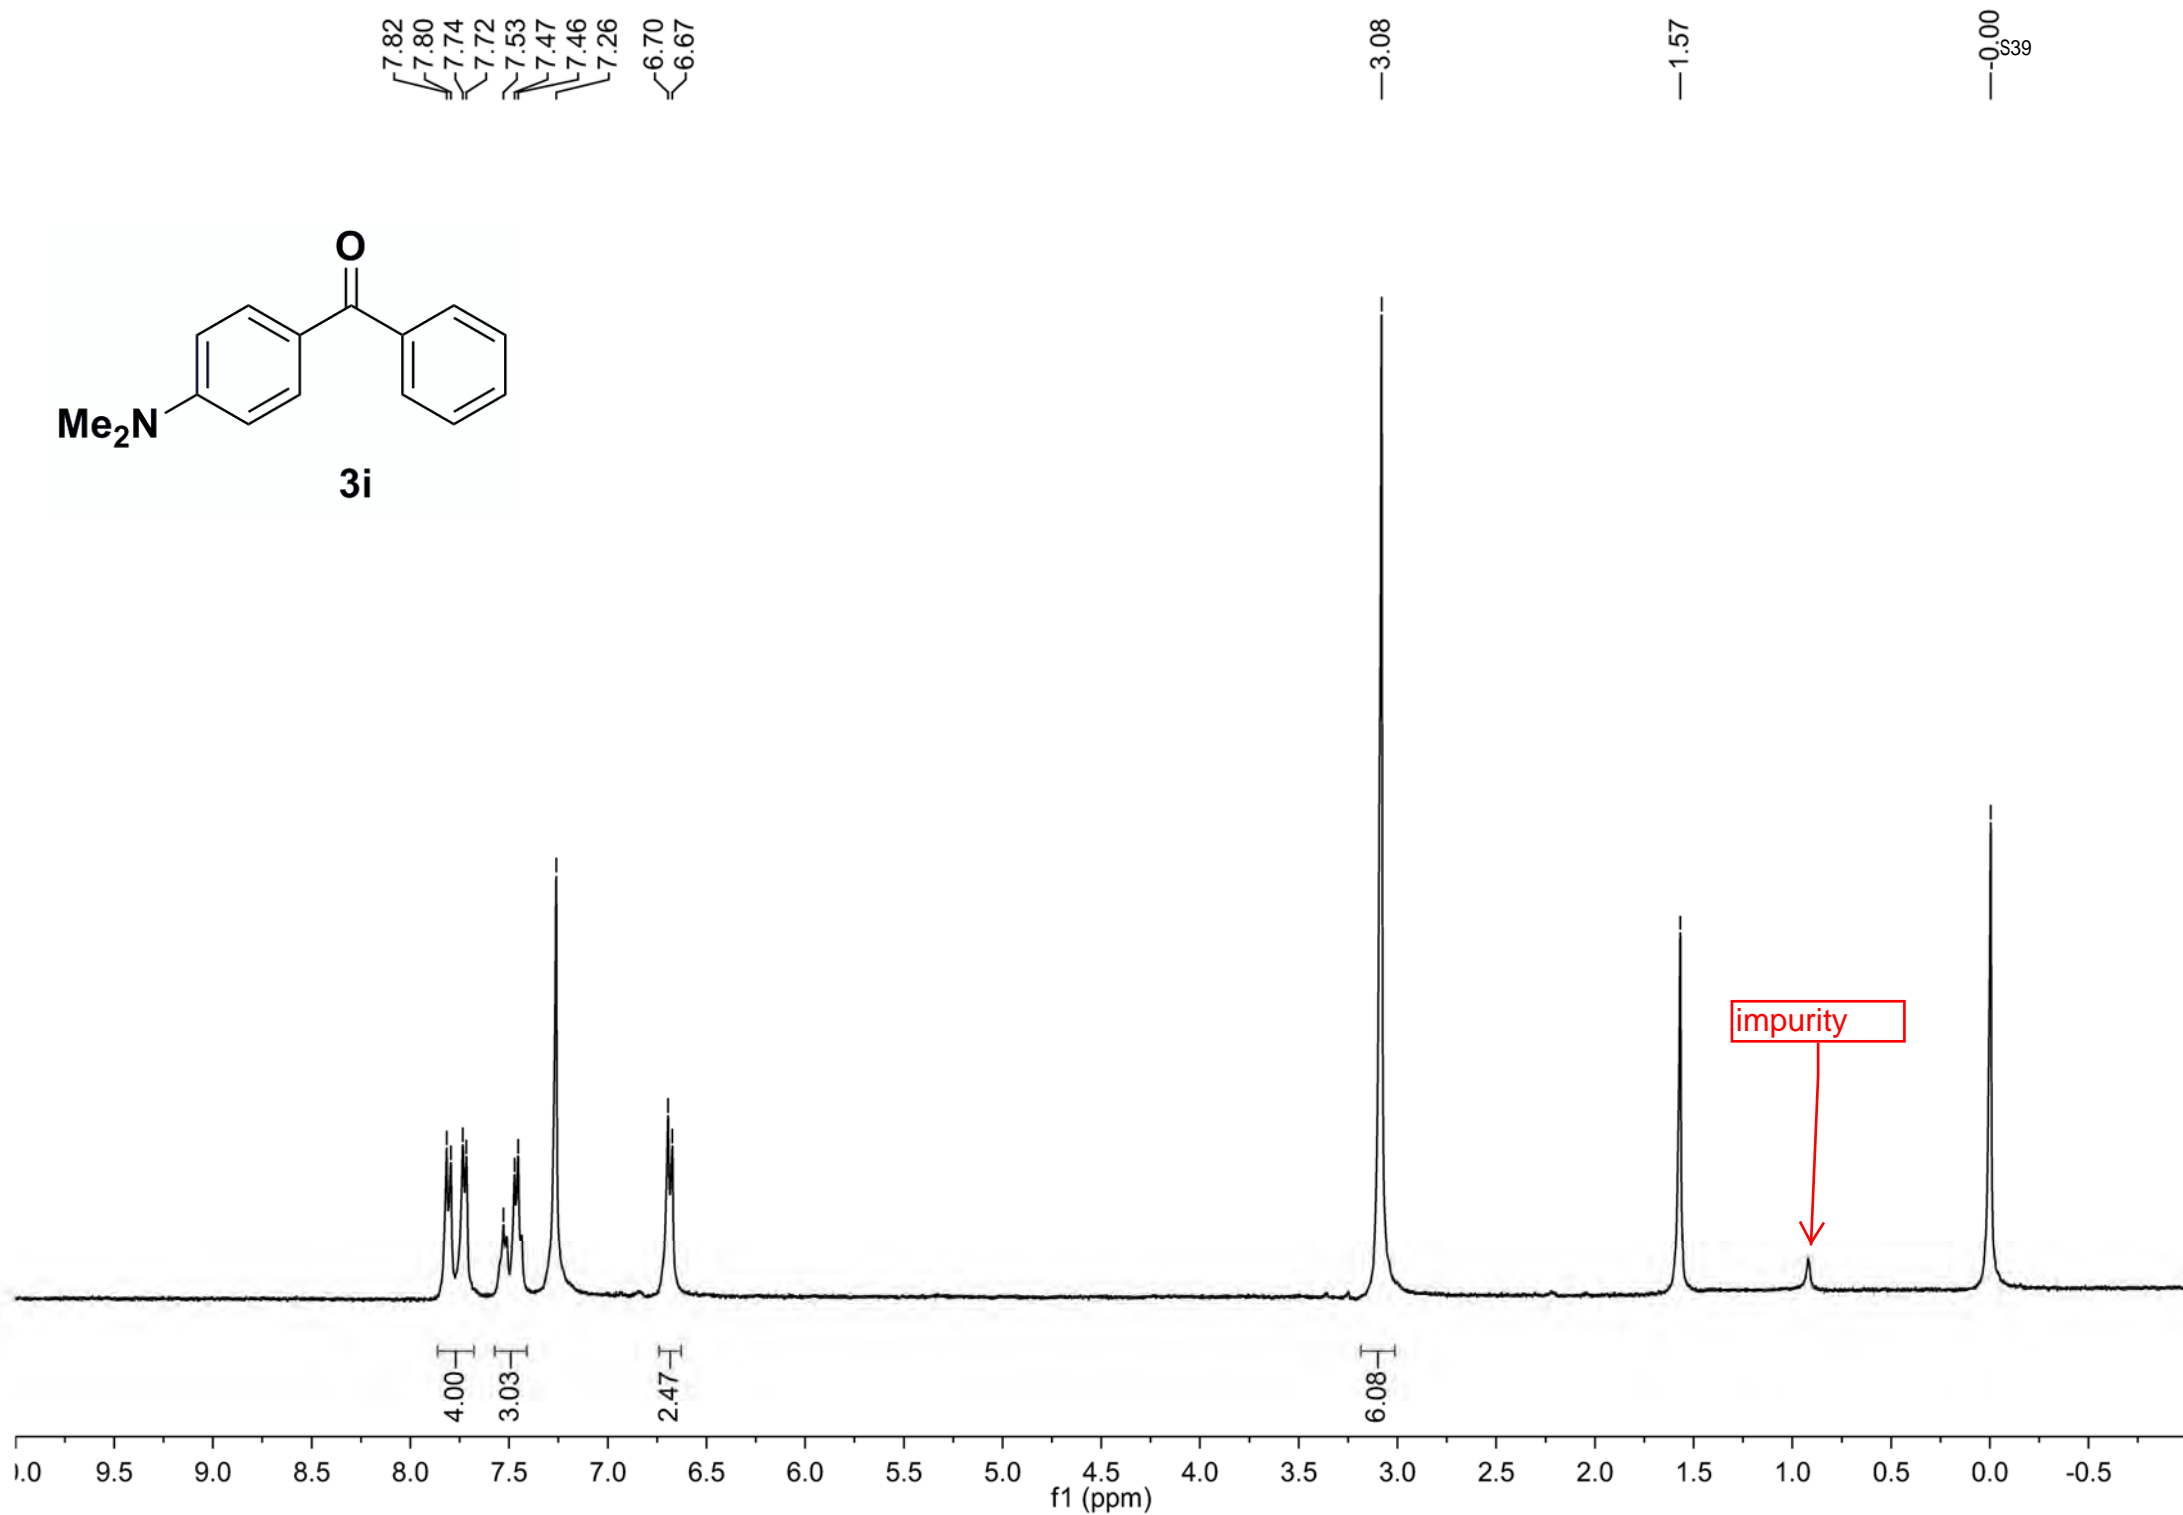

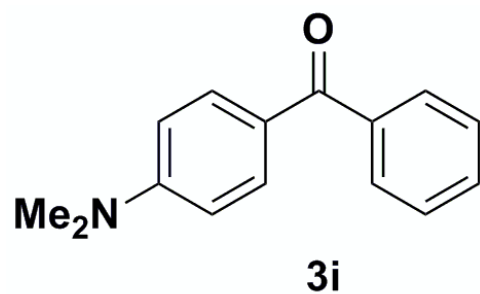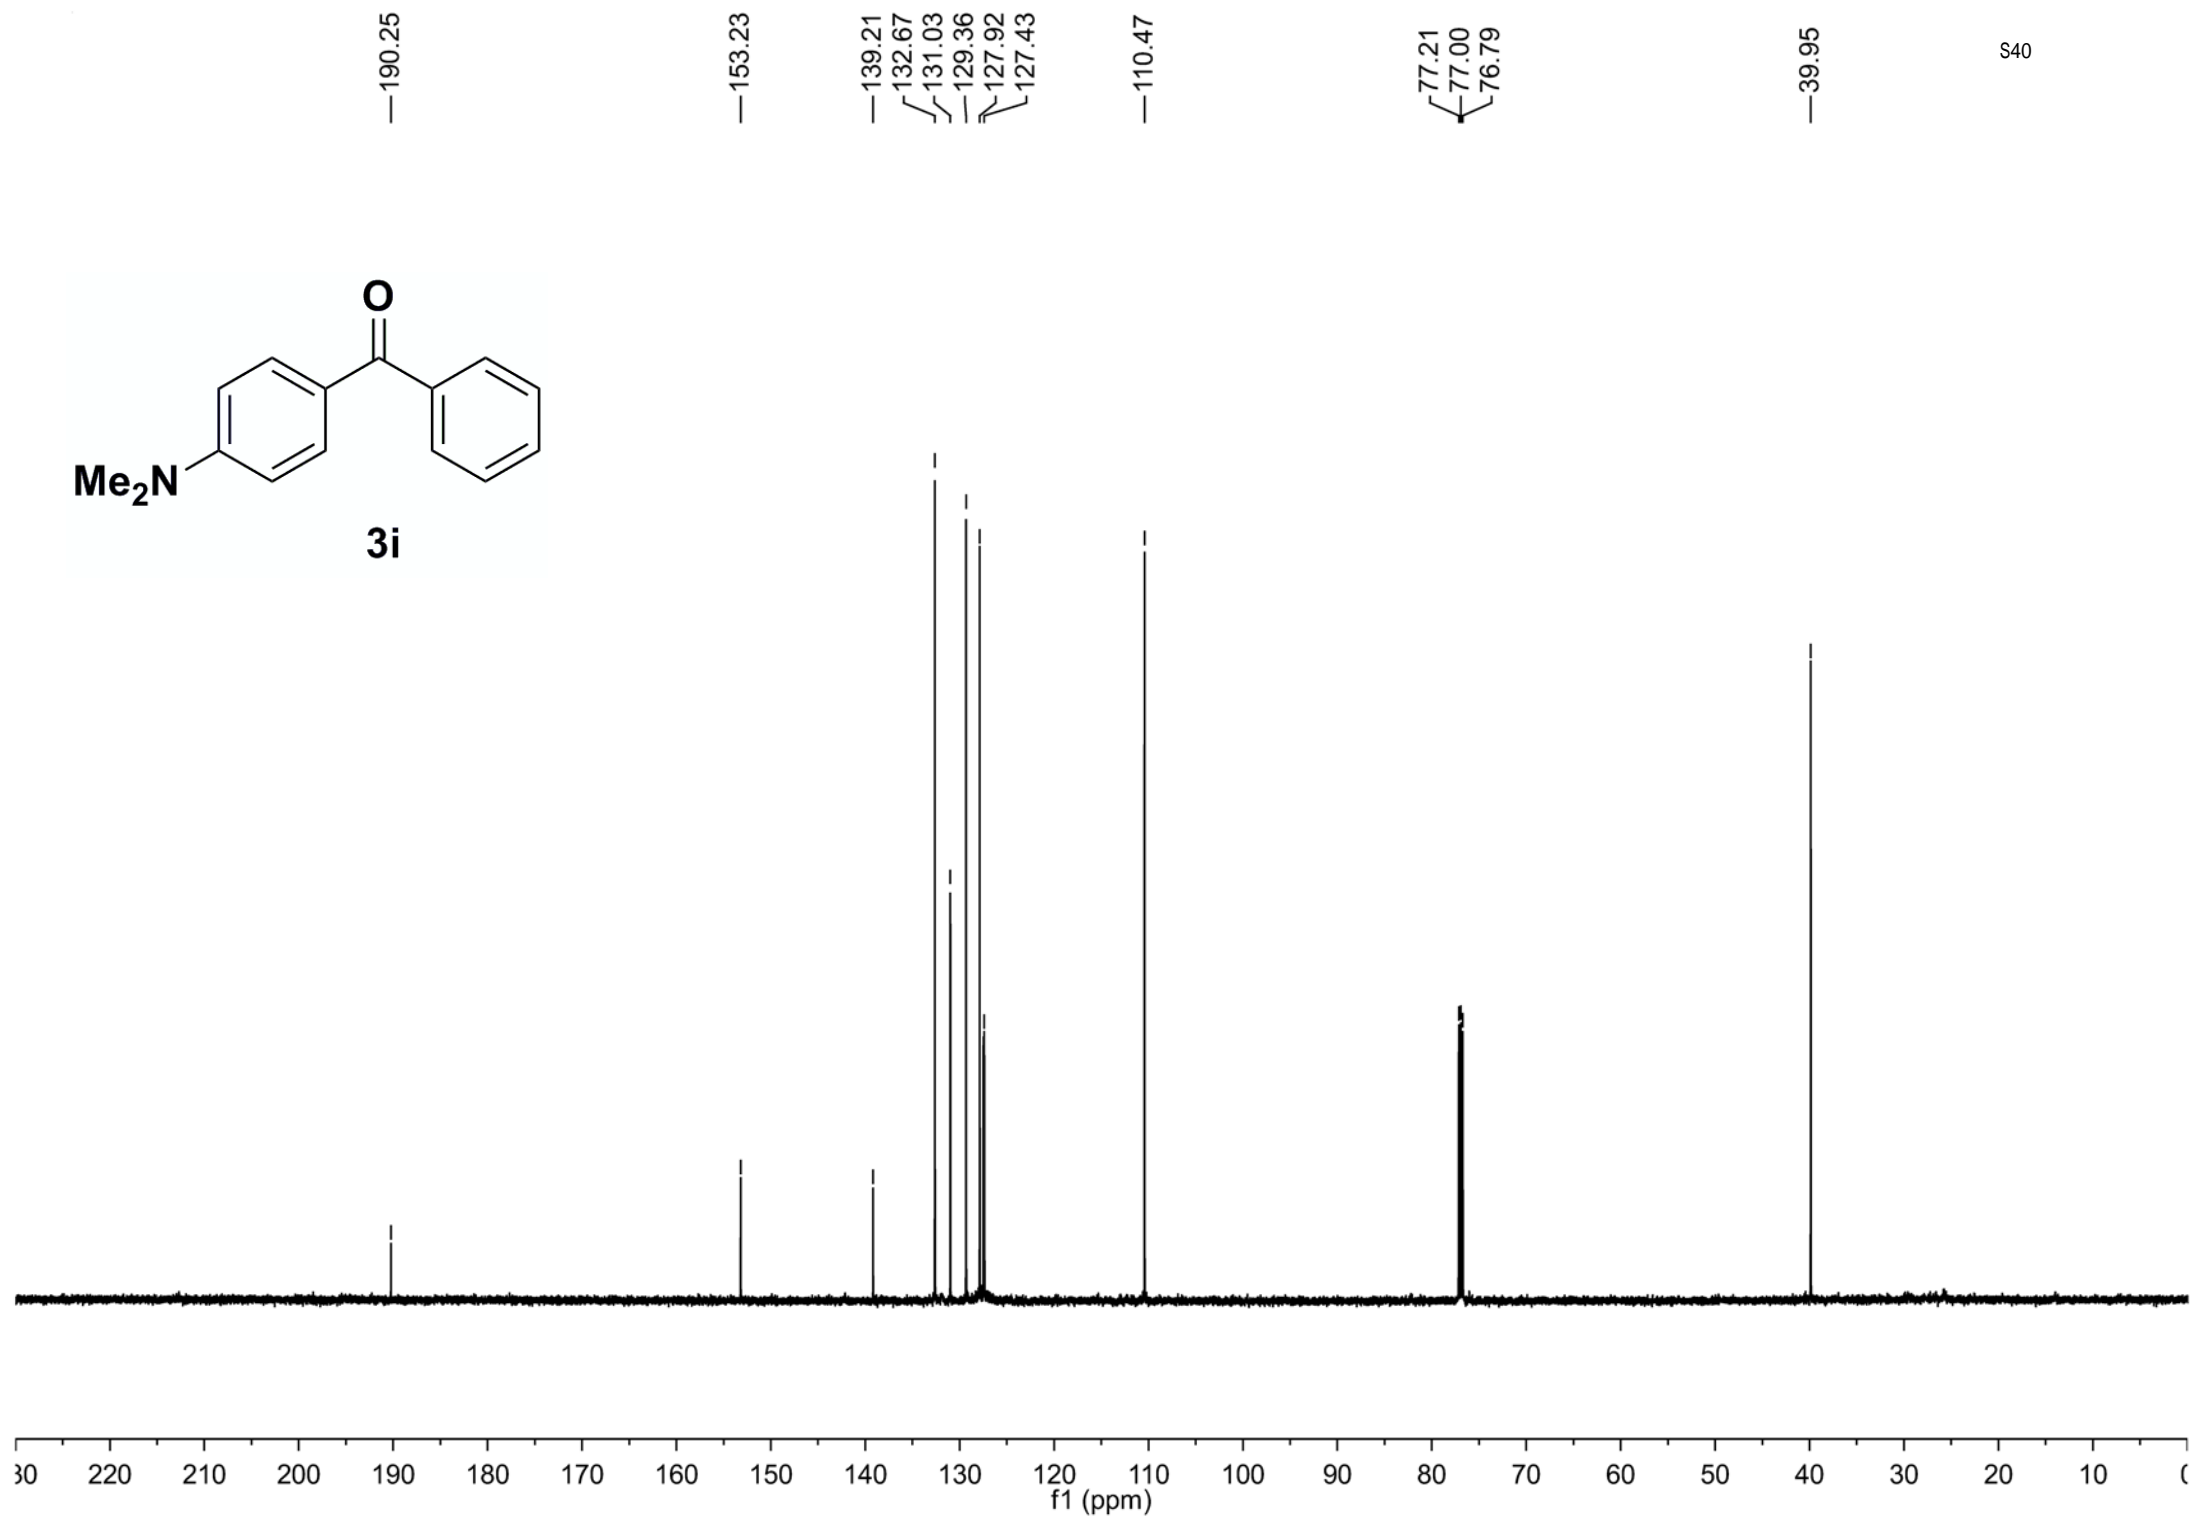

7.81  
7.79  
7.51  
7.49  
7.35  
7.33  
7.26  
7.22

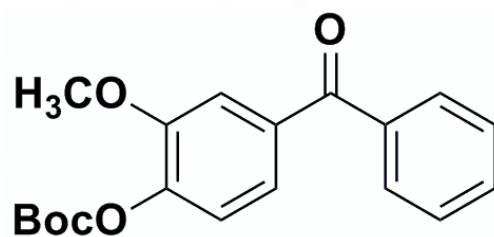

3j

3.92

0.00

S41

1.57

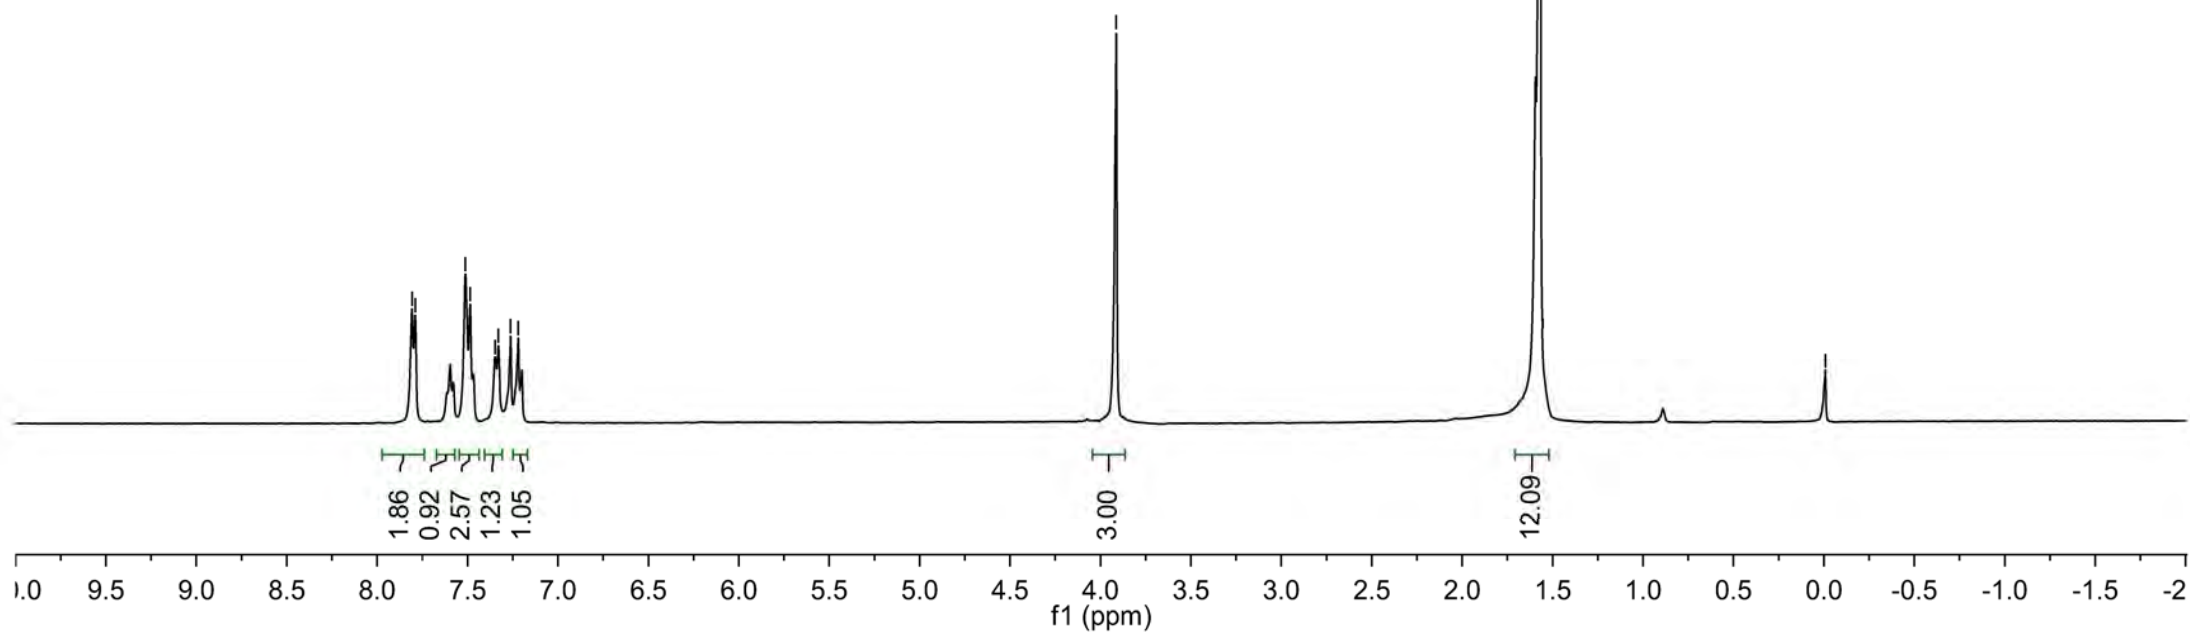

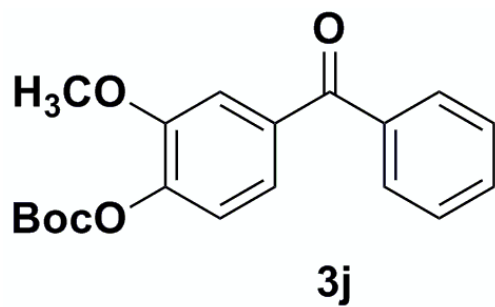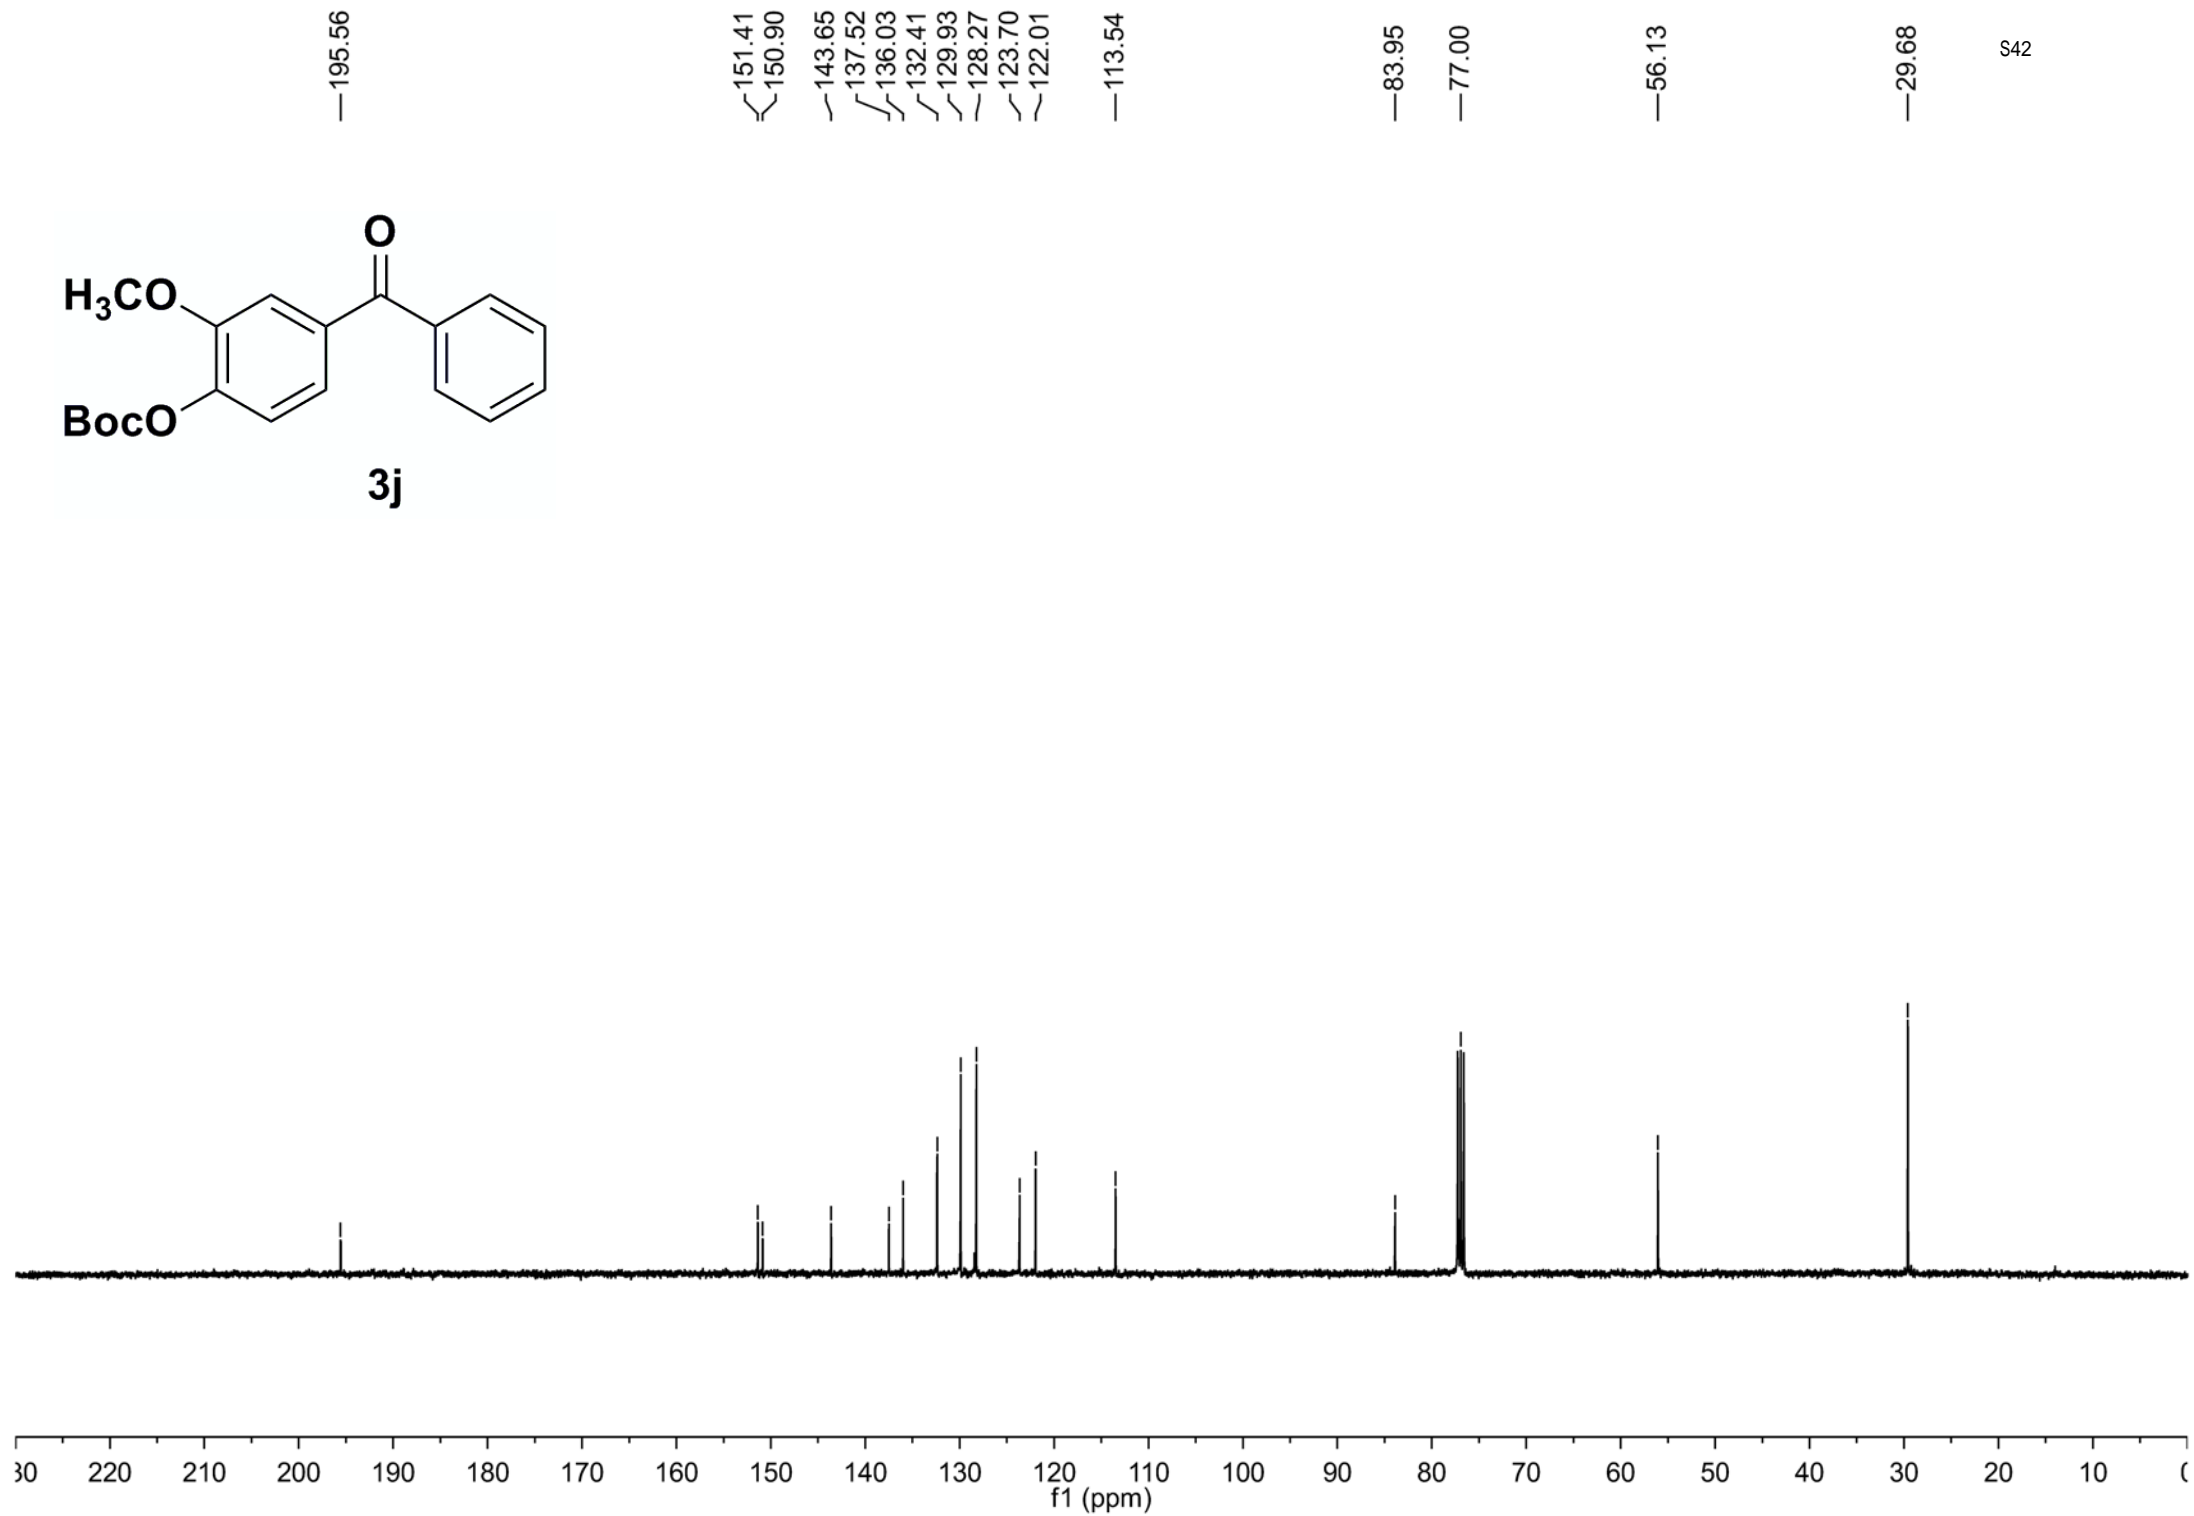

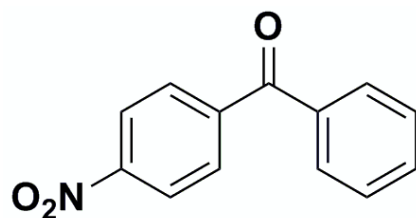

**3k**

8.363  
8.358  
8.345  
8.341  
7.956  
7.951  
7.939  
7.934  
7.818  
7.800  
7.797  
7.663  
7.645  
7.553  
7.533  
7.514  
7.264

1.572

0.000  
s43

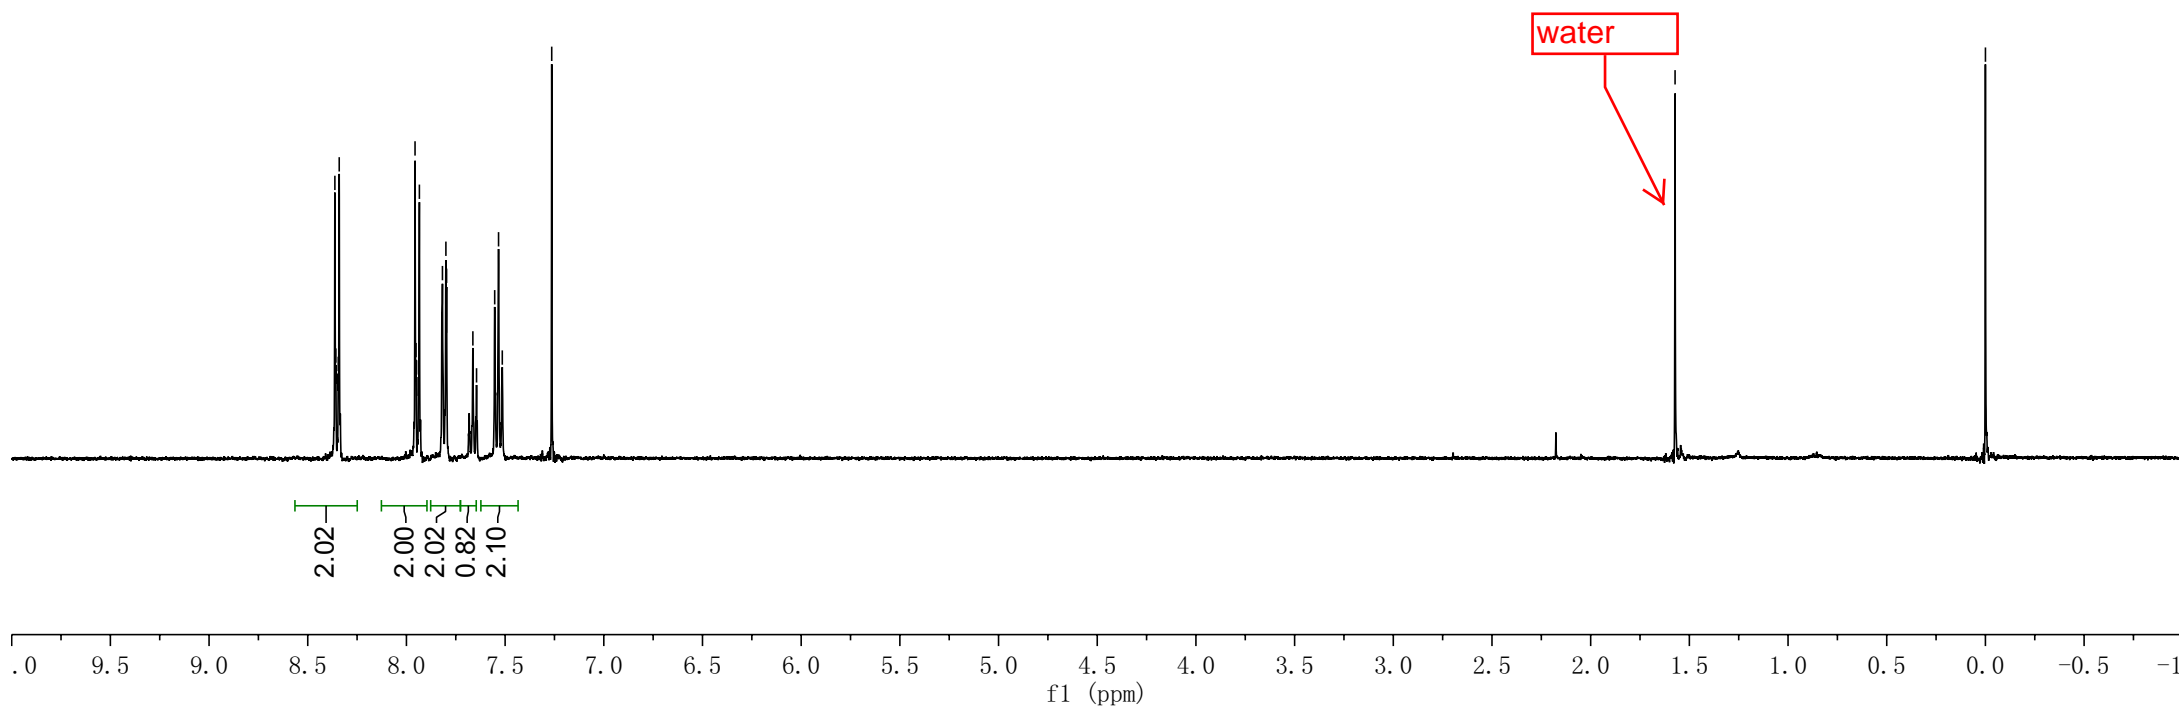

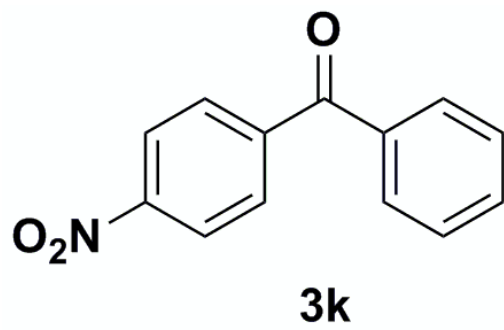

—194.724

—149.787

—142.843

↘136.246

↘133.419

↘130.642

↘130.046

↘128.637

—123.493

↘77.307

↘76.989

↘76.672

S44

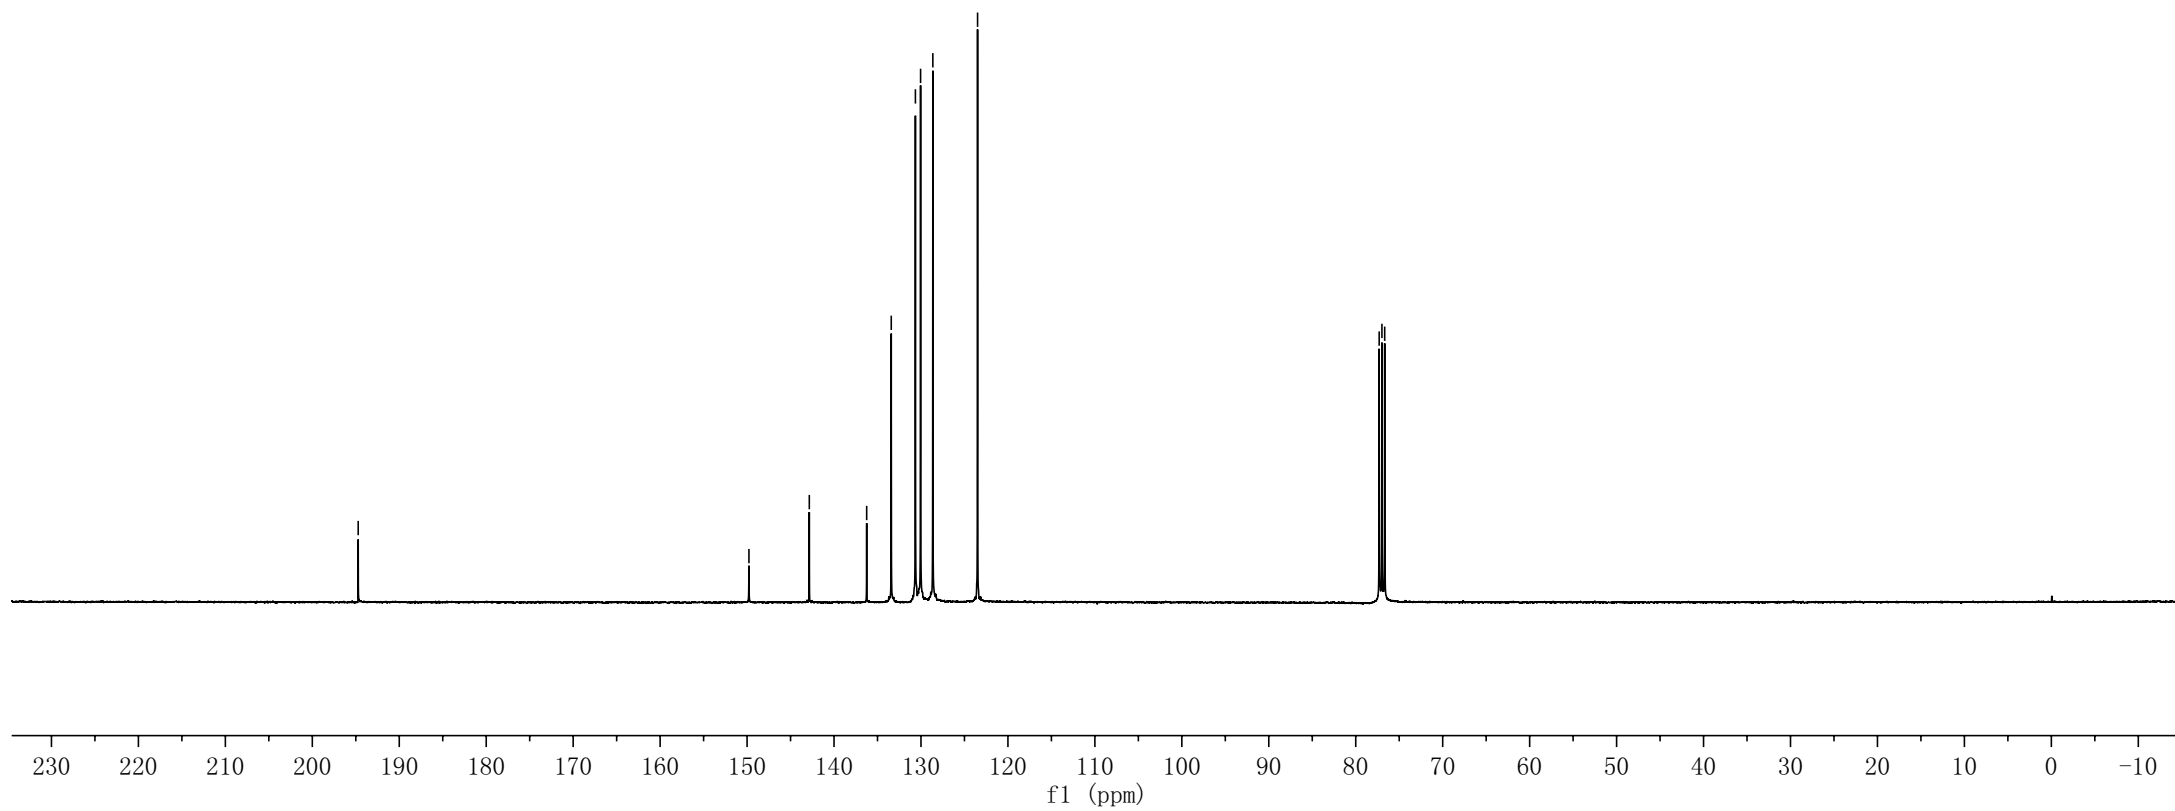

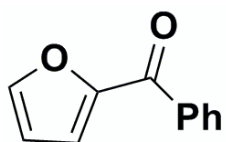

3l

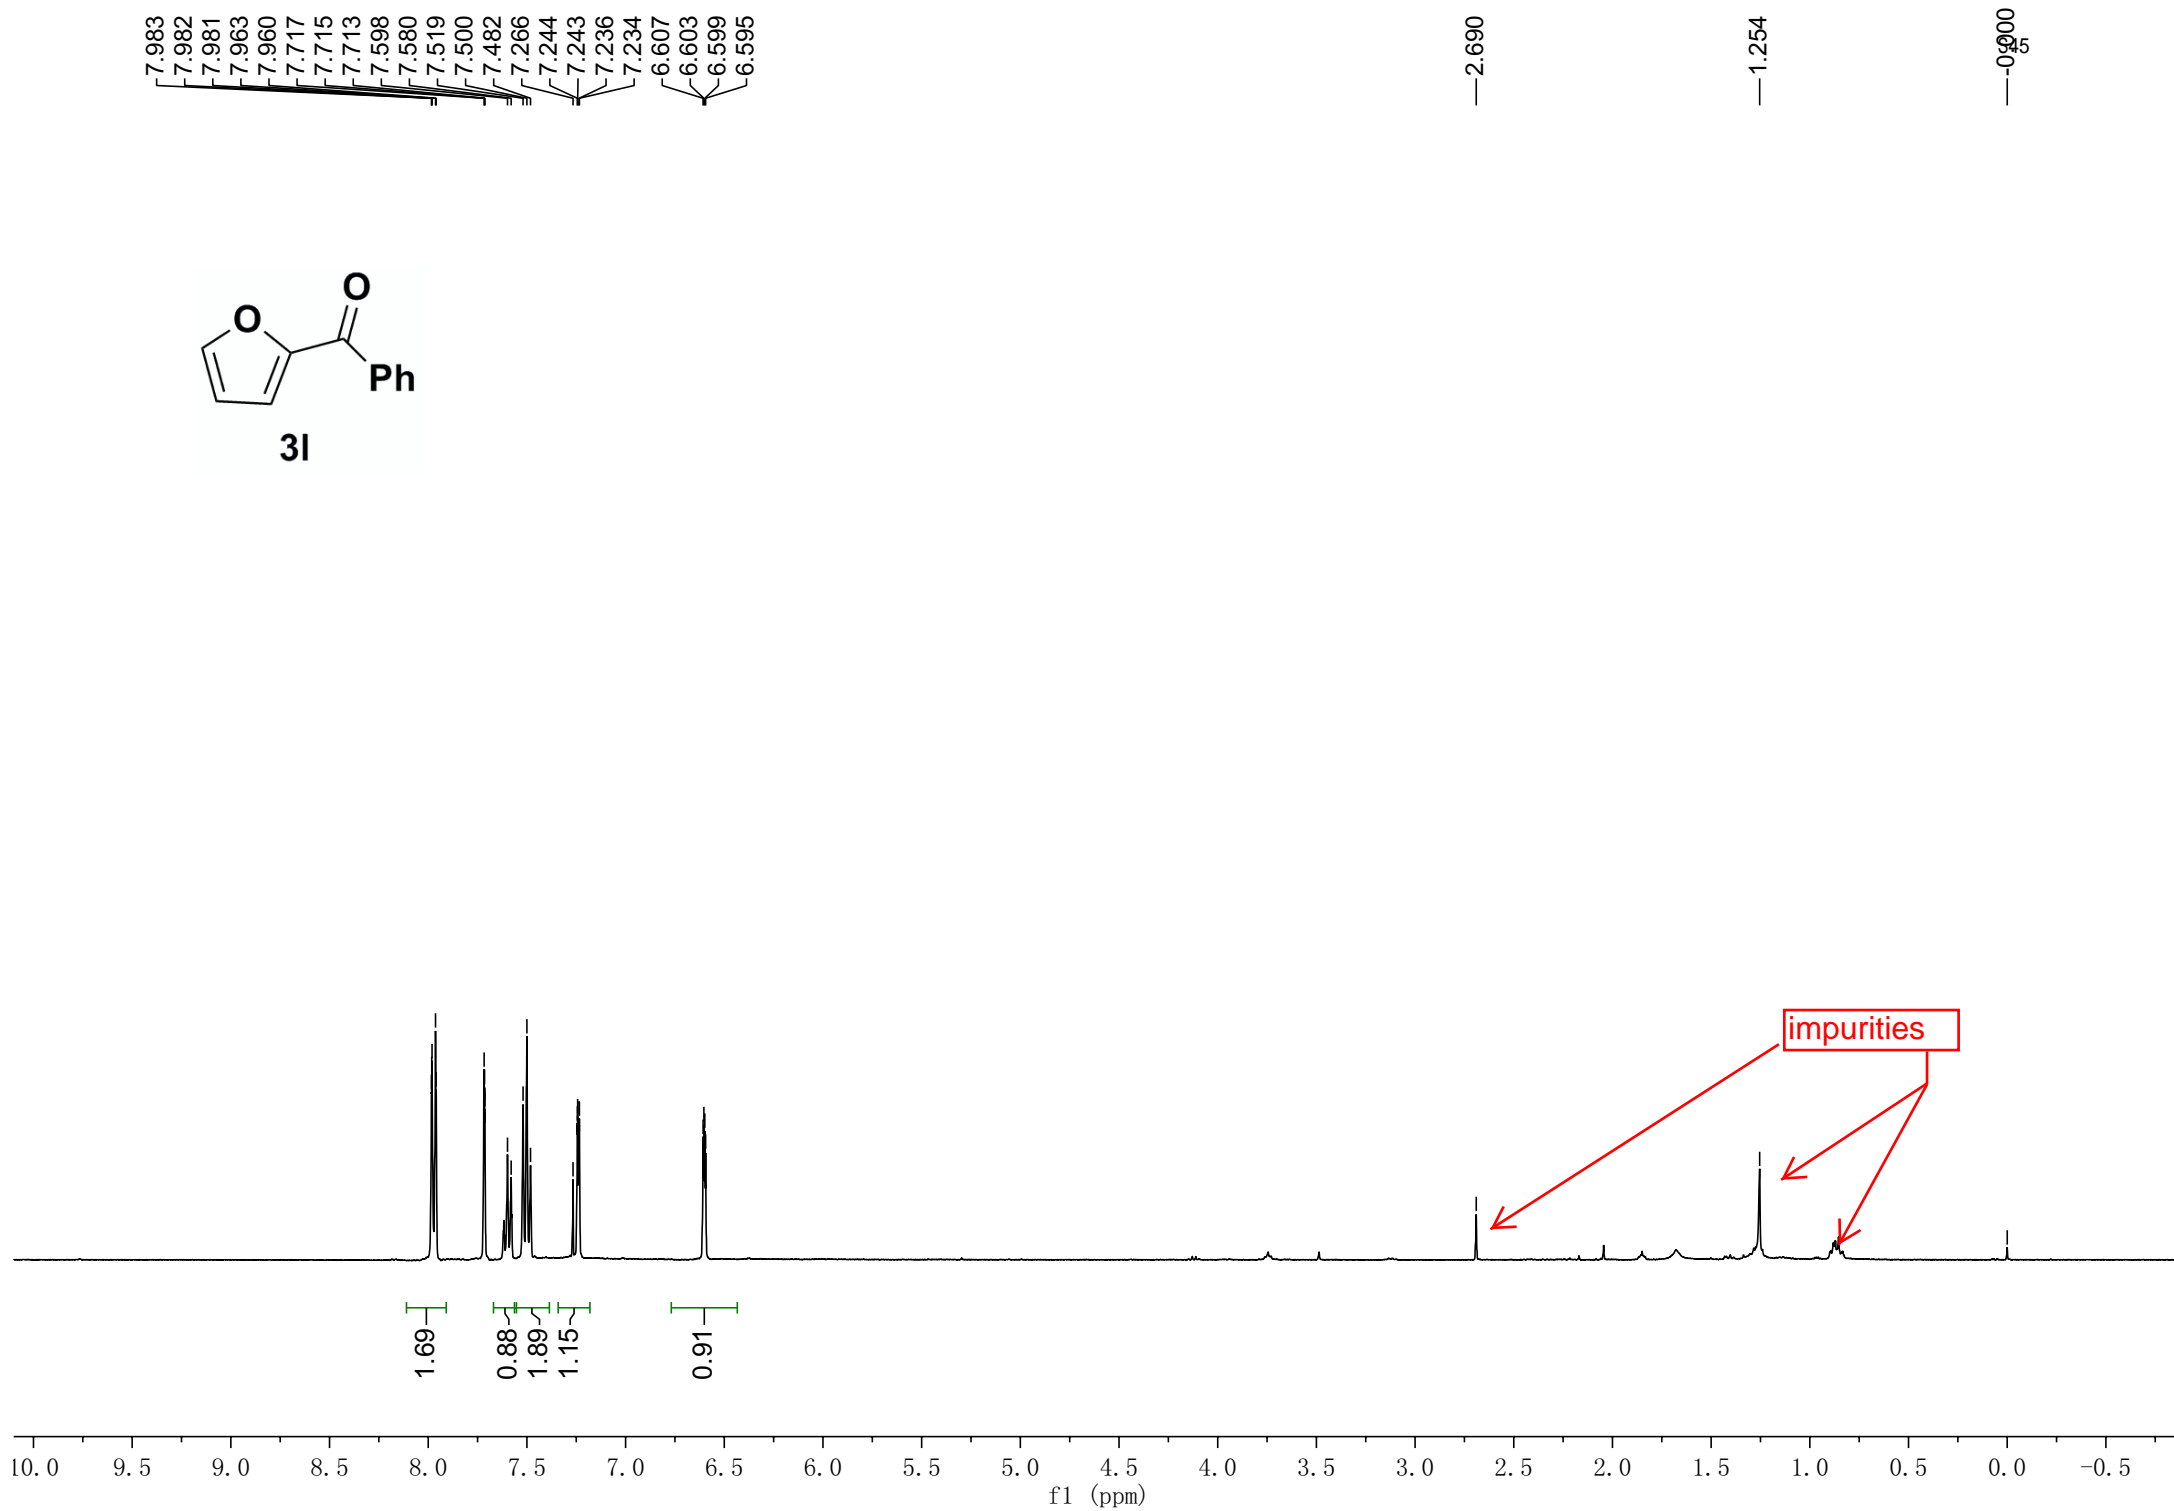

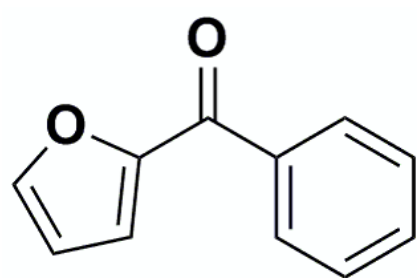

**3k**

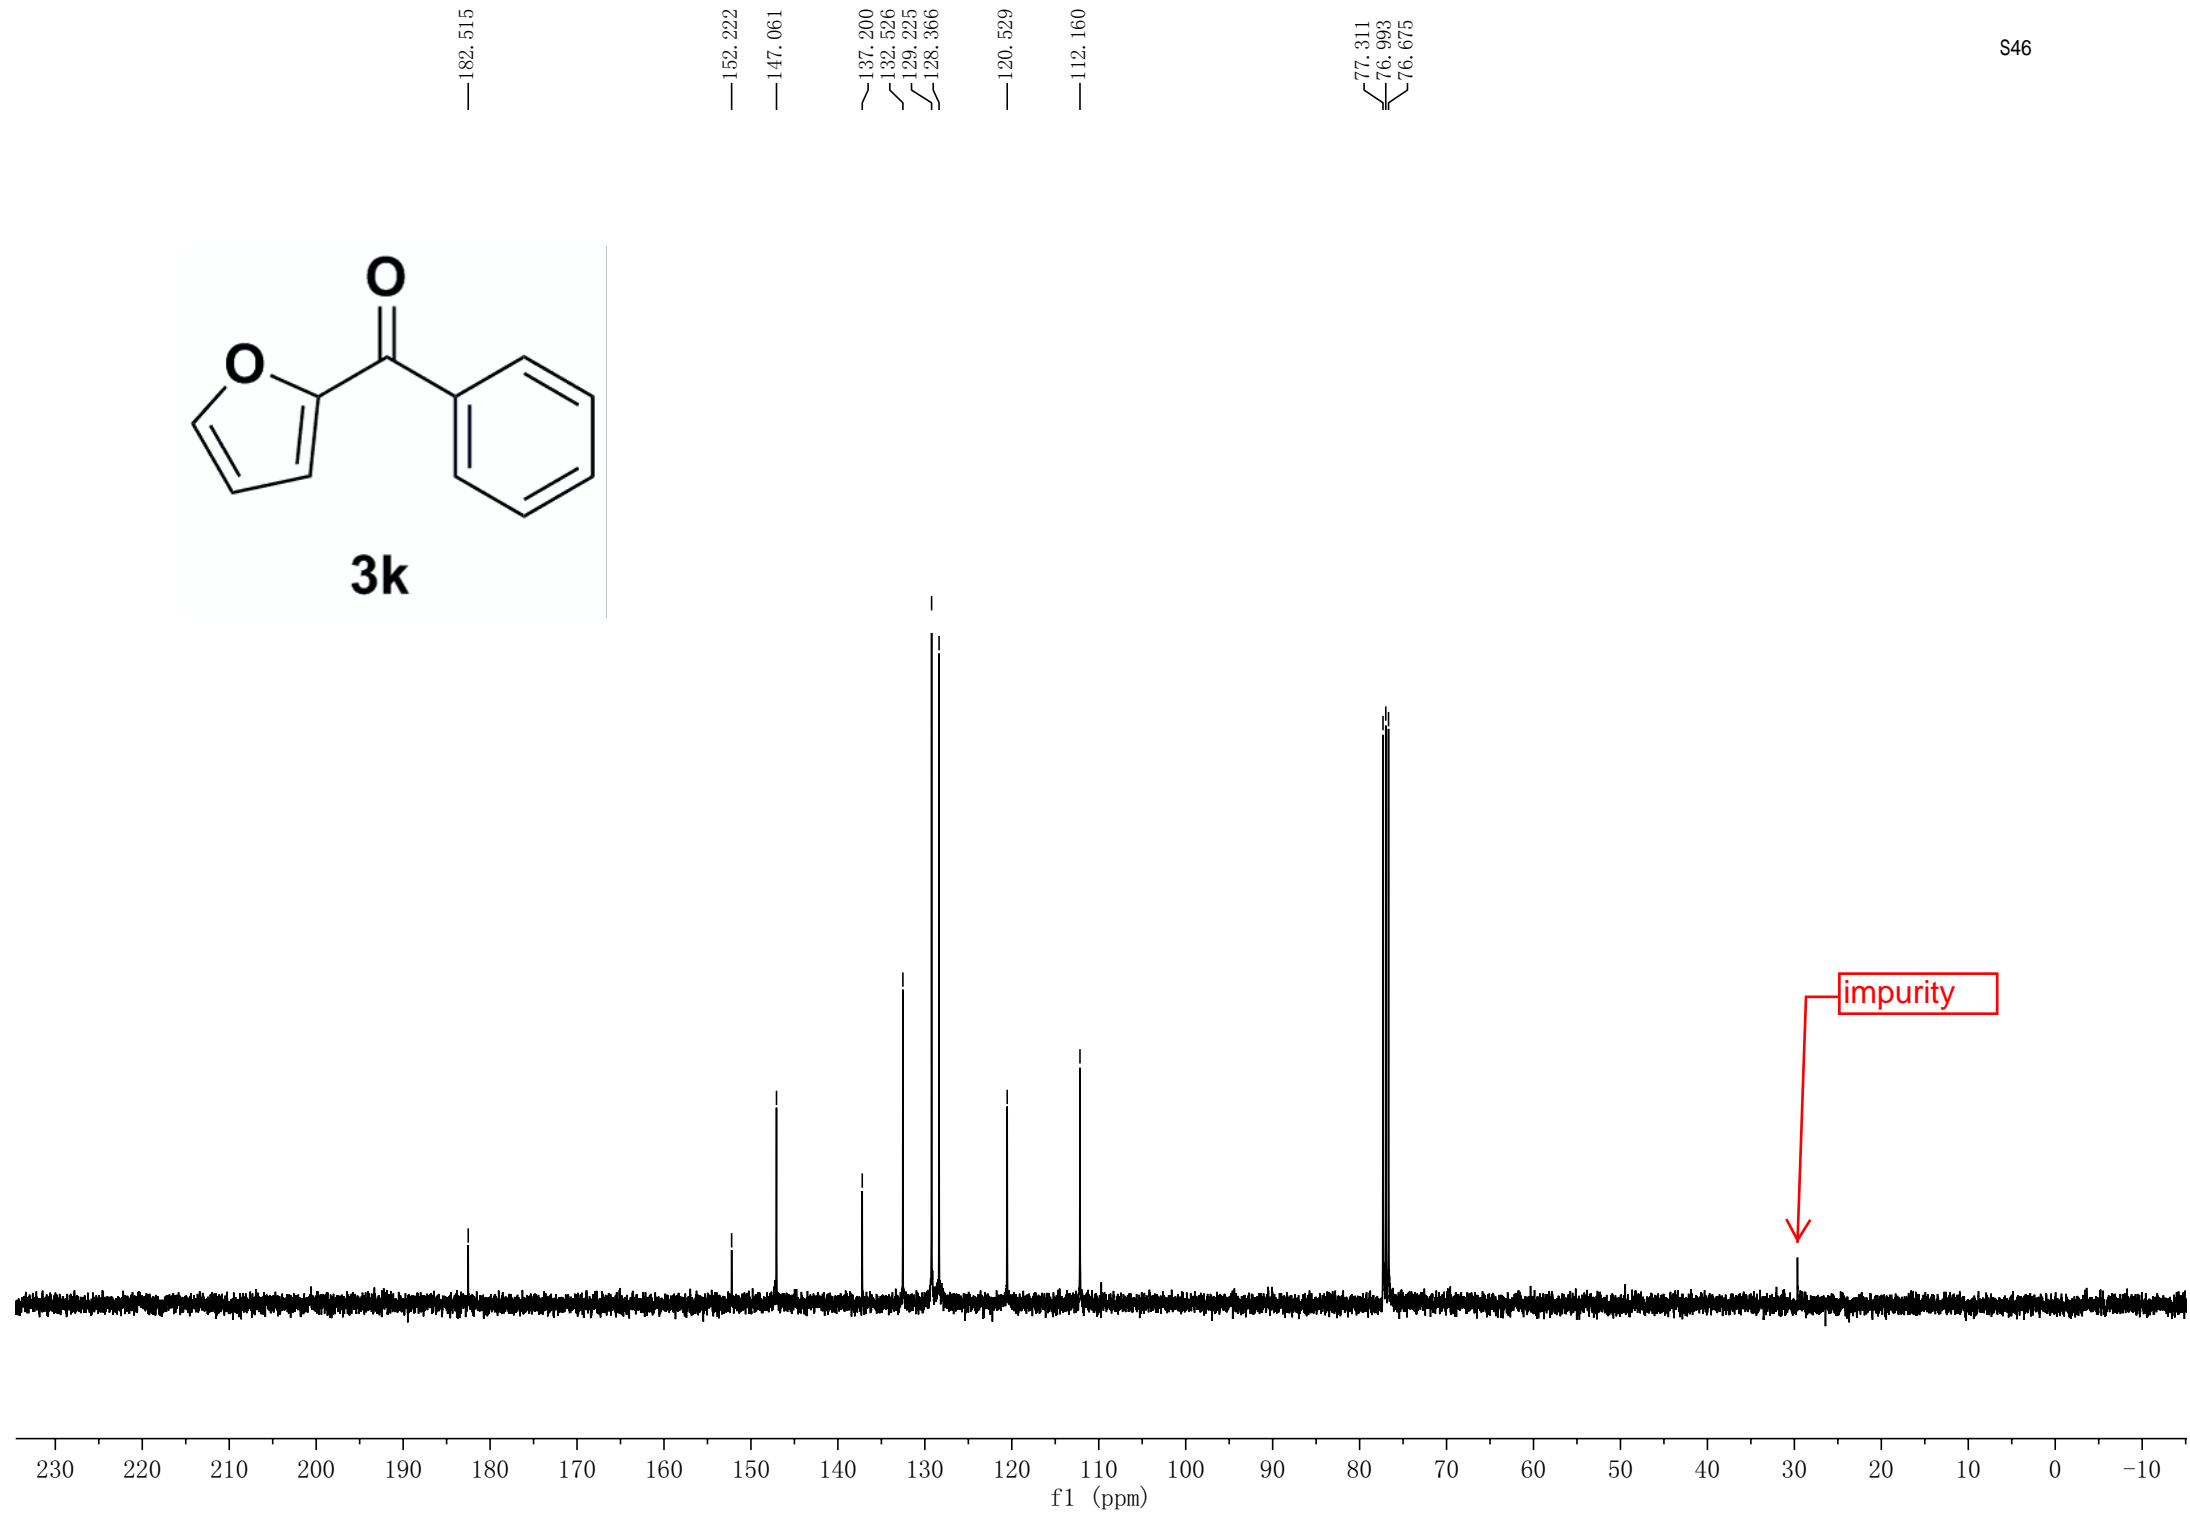

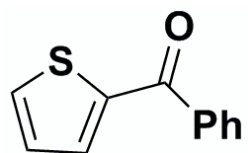

**3m**

7.88  
7.86  
7.74  
7.73  
7.66  
7.60  
7.59  
7.53  
7.51  
7.26  
7.18  
7.17

—1.58

—0.00

S47

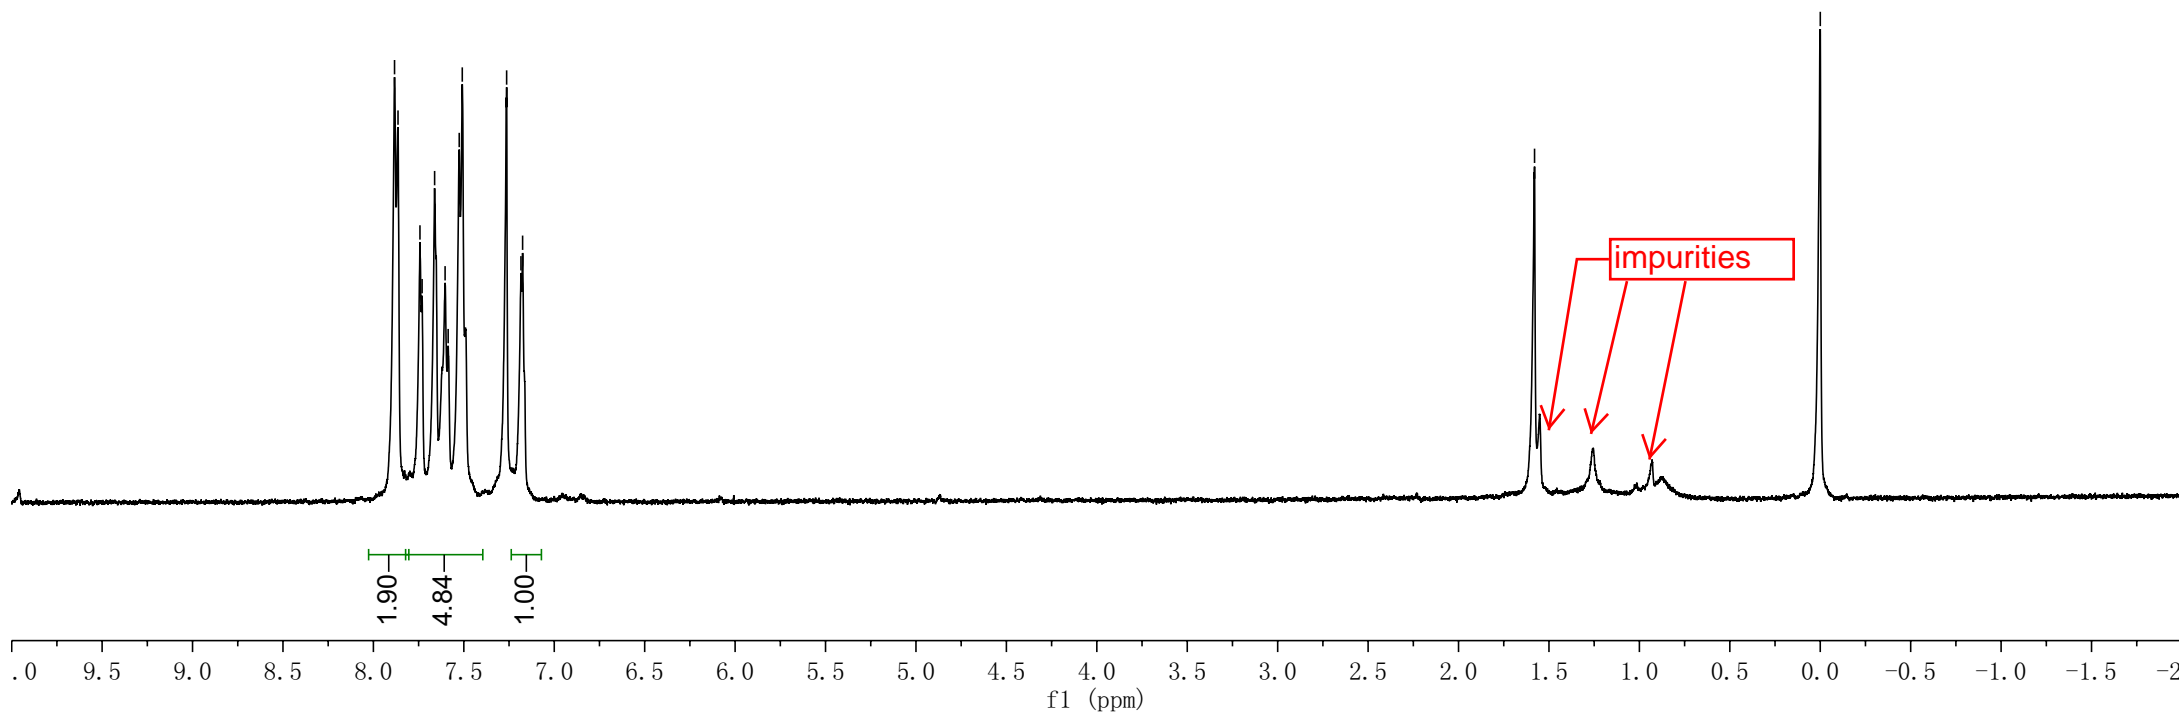

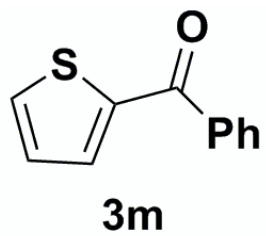

— 188.18

— 143.60  
 — 138.12  
 — 134.81  
 — 134.17  
 — 132.23  
 — 129.13  
 — 128.38  
 — 127.93

— 77.23  
 — 77.02  
 — 76.81

S48

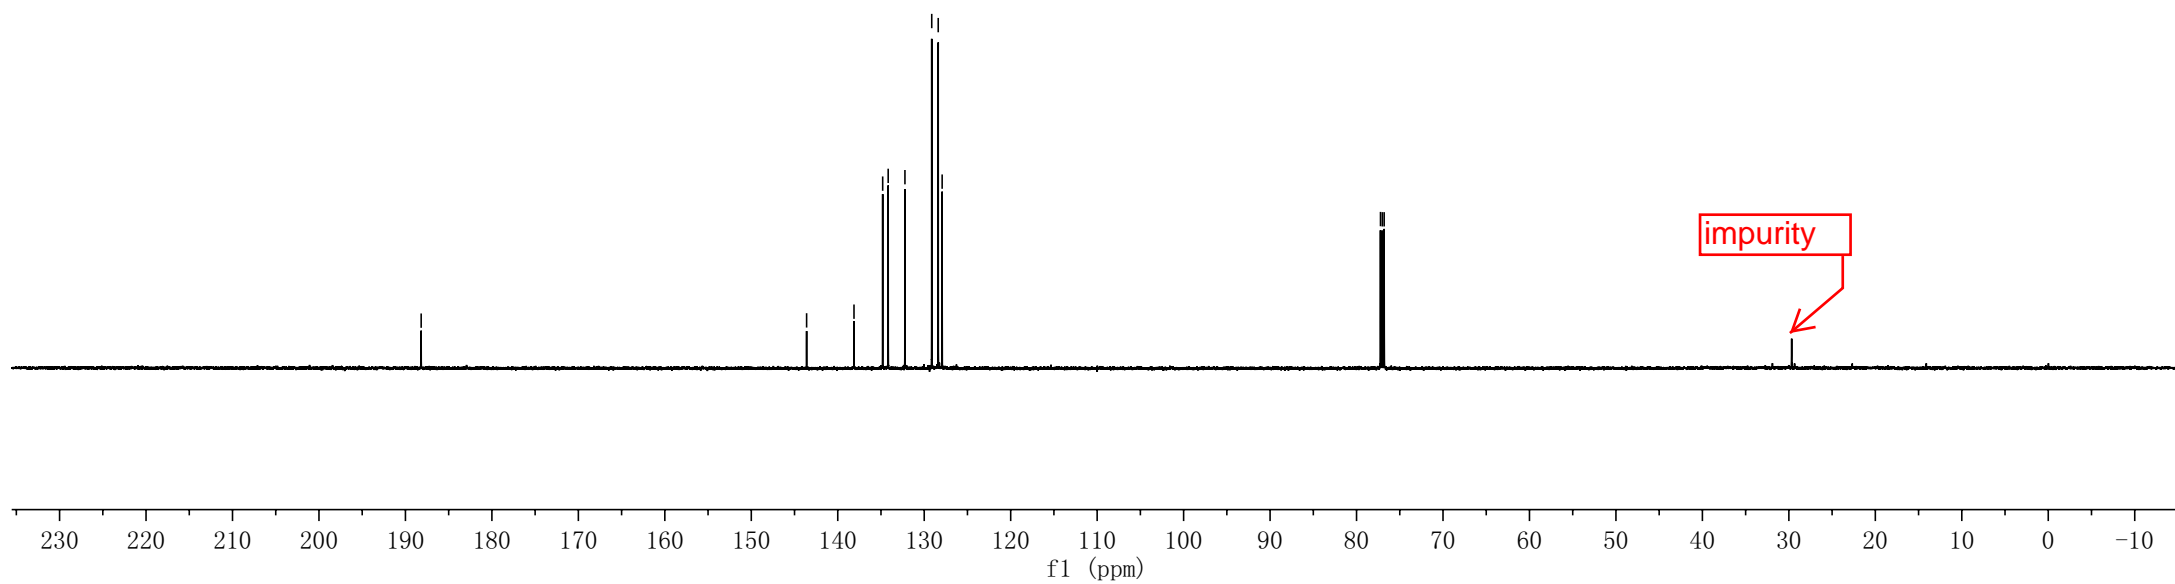

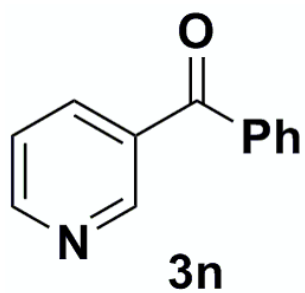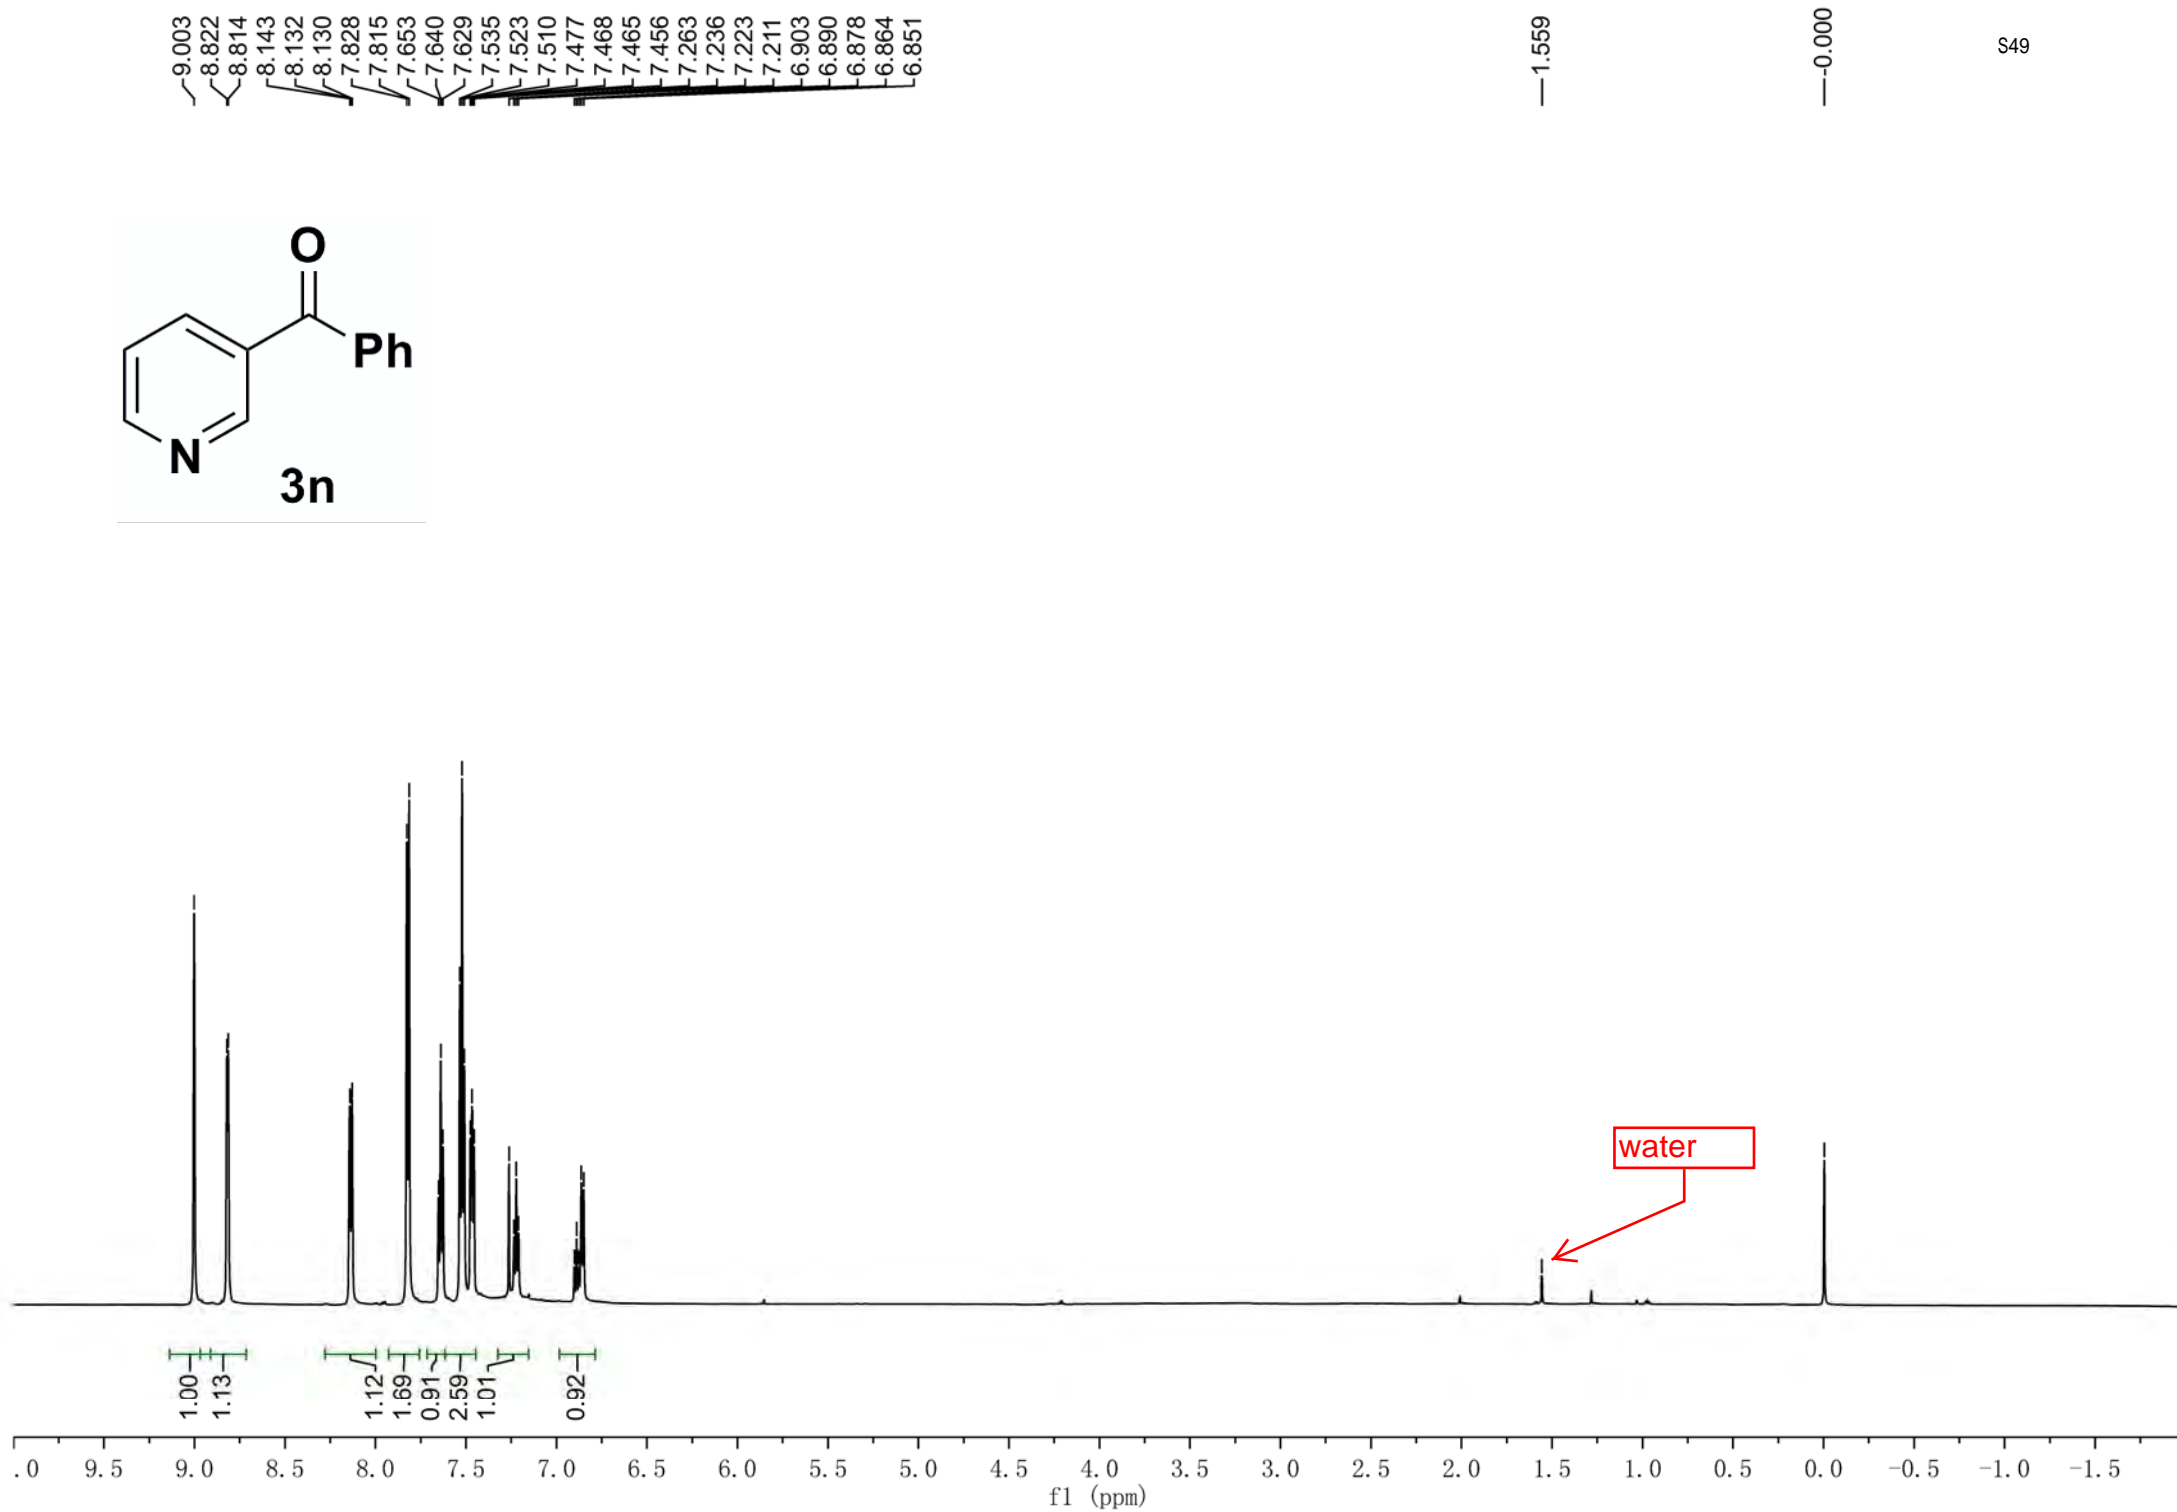

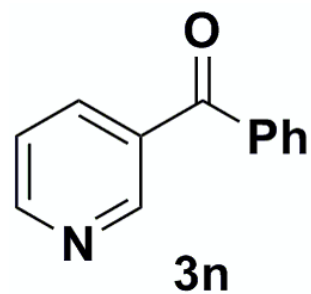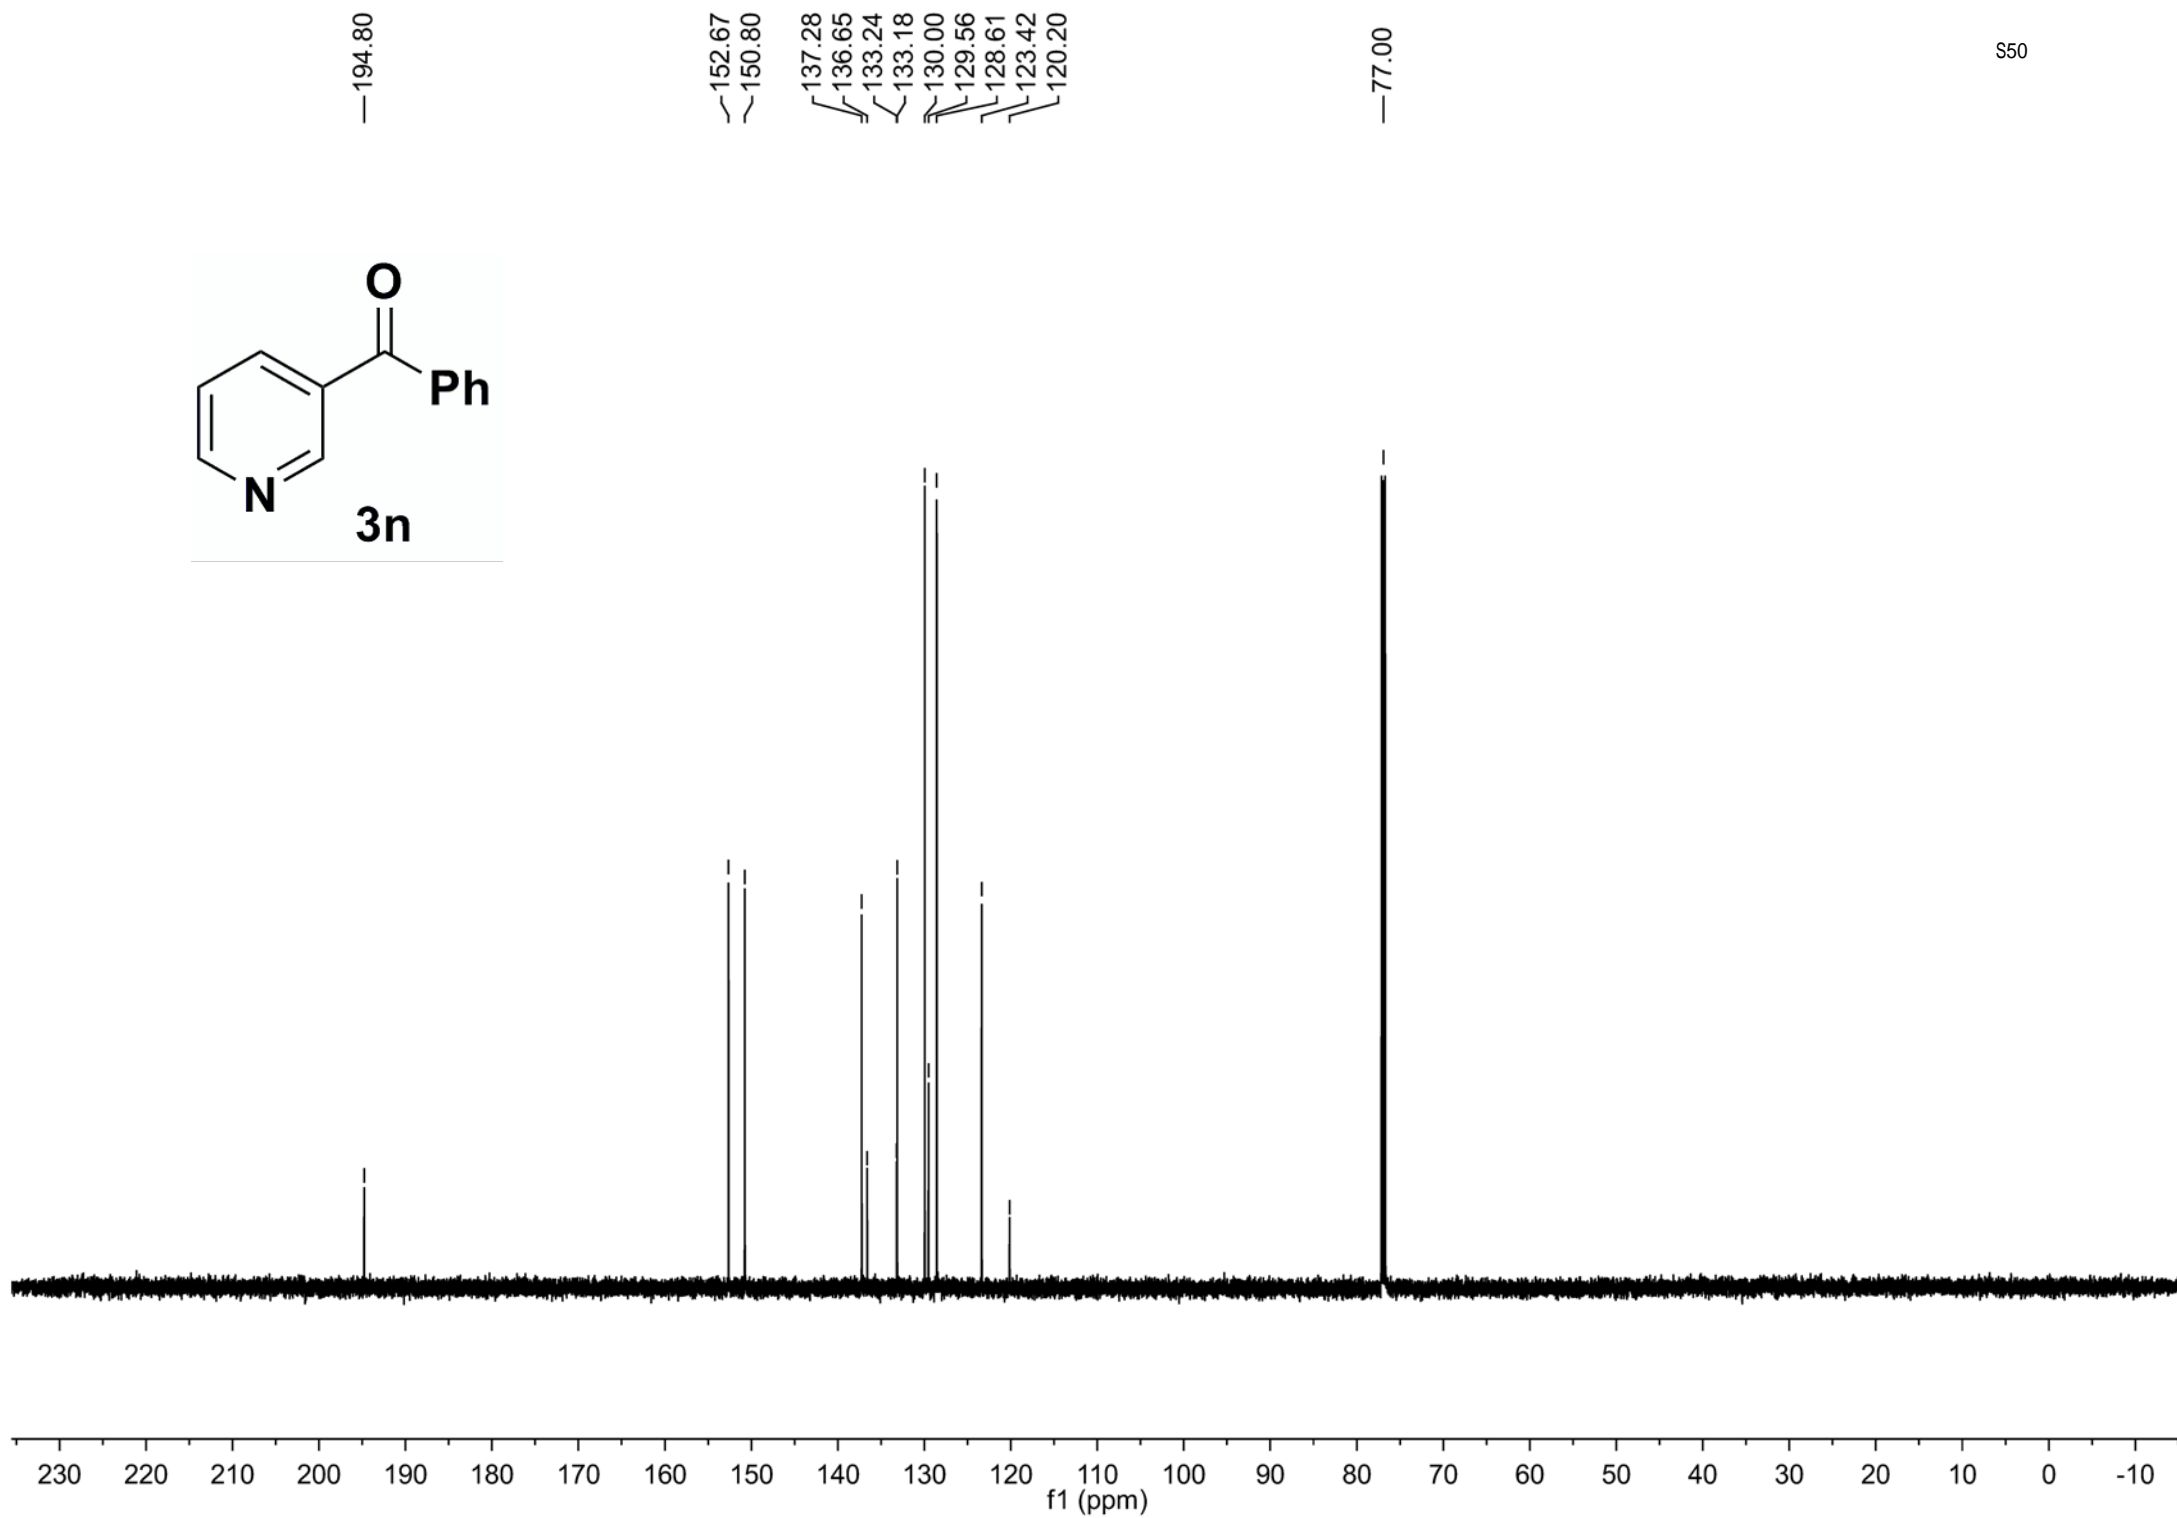

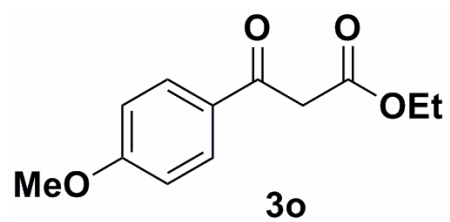

7.935  
7.921

7.259  
7.258  
6.953  
6.939

4.226  
4.214  
4.202  
4.190  
3.938  
3.877

1.563  
1.268  
1.255  
1.244

—0.002

S51

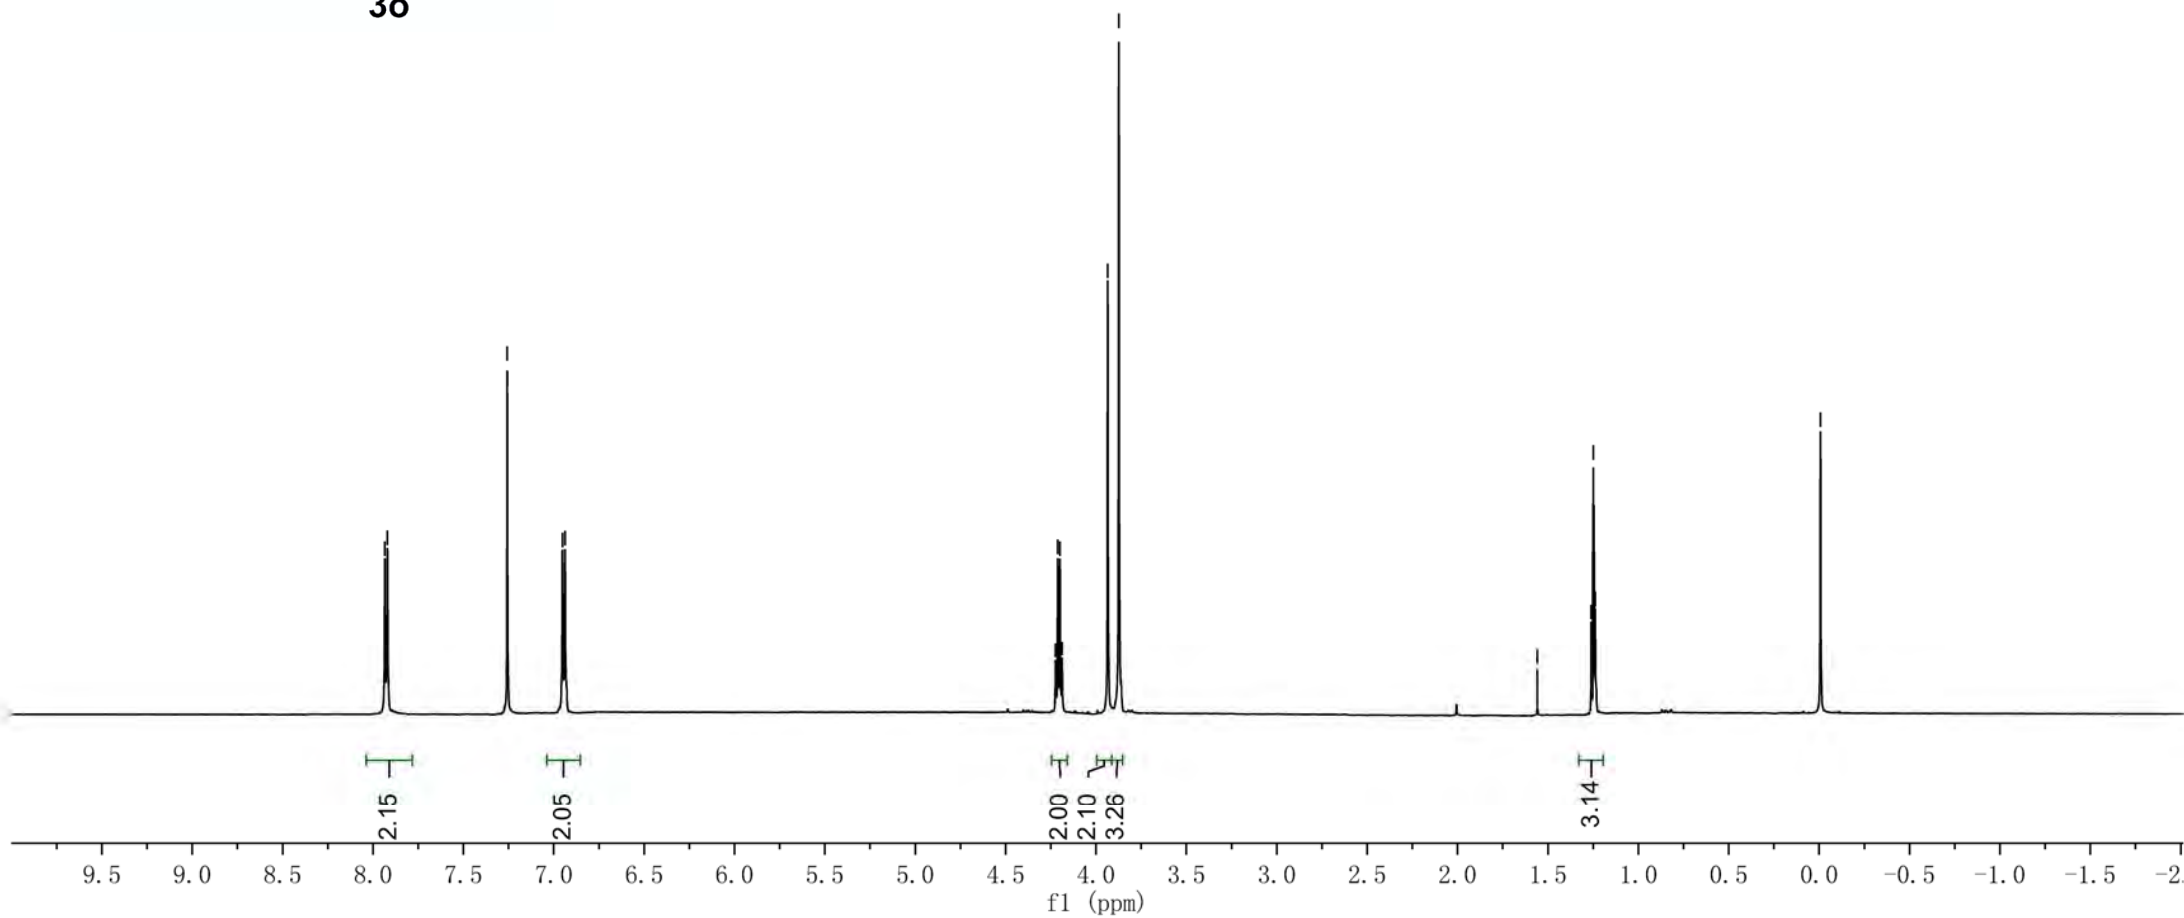

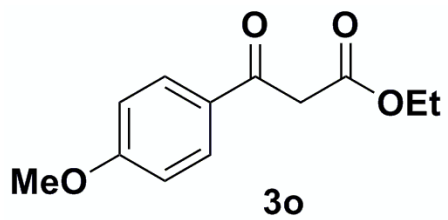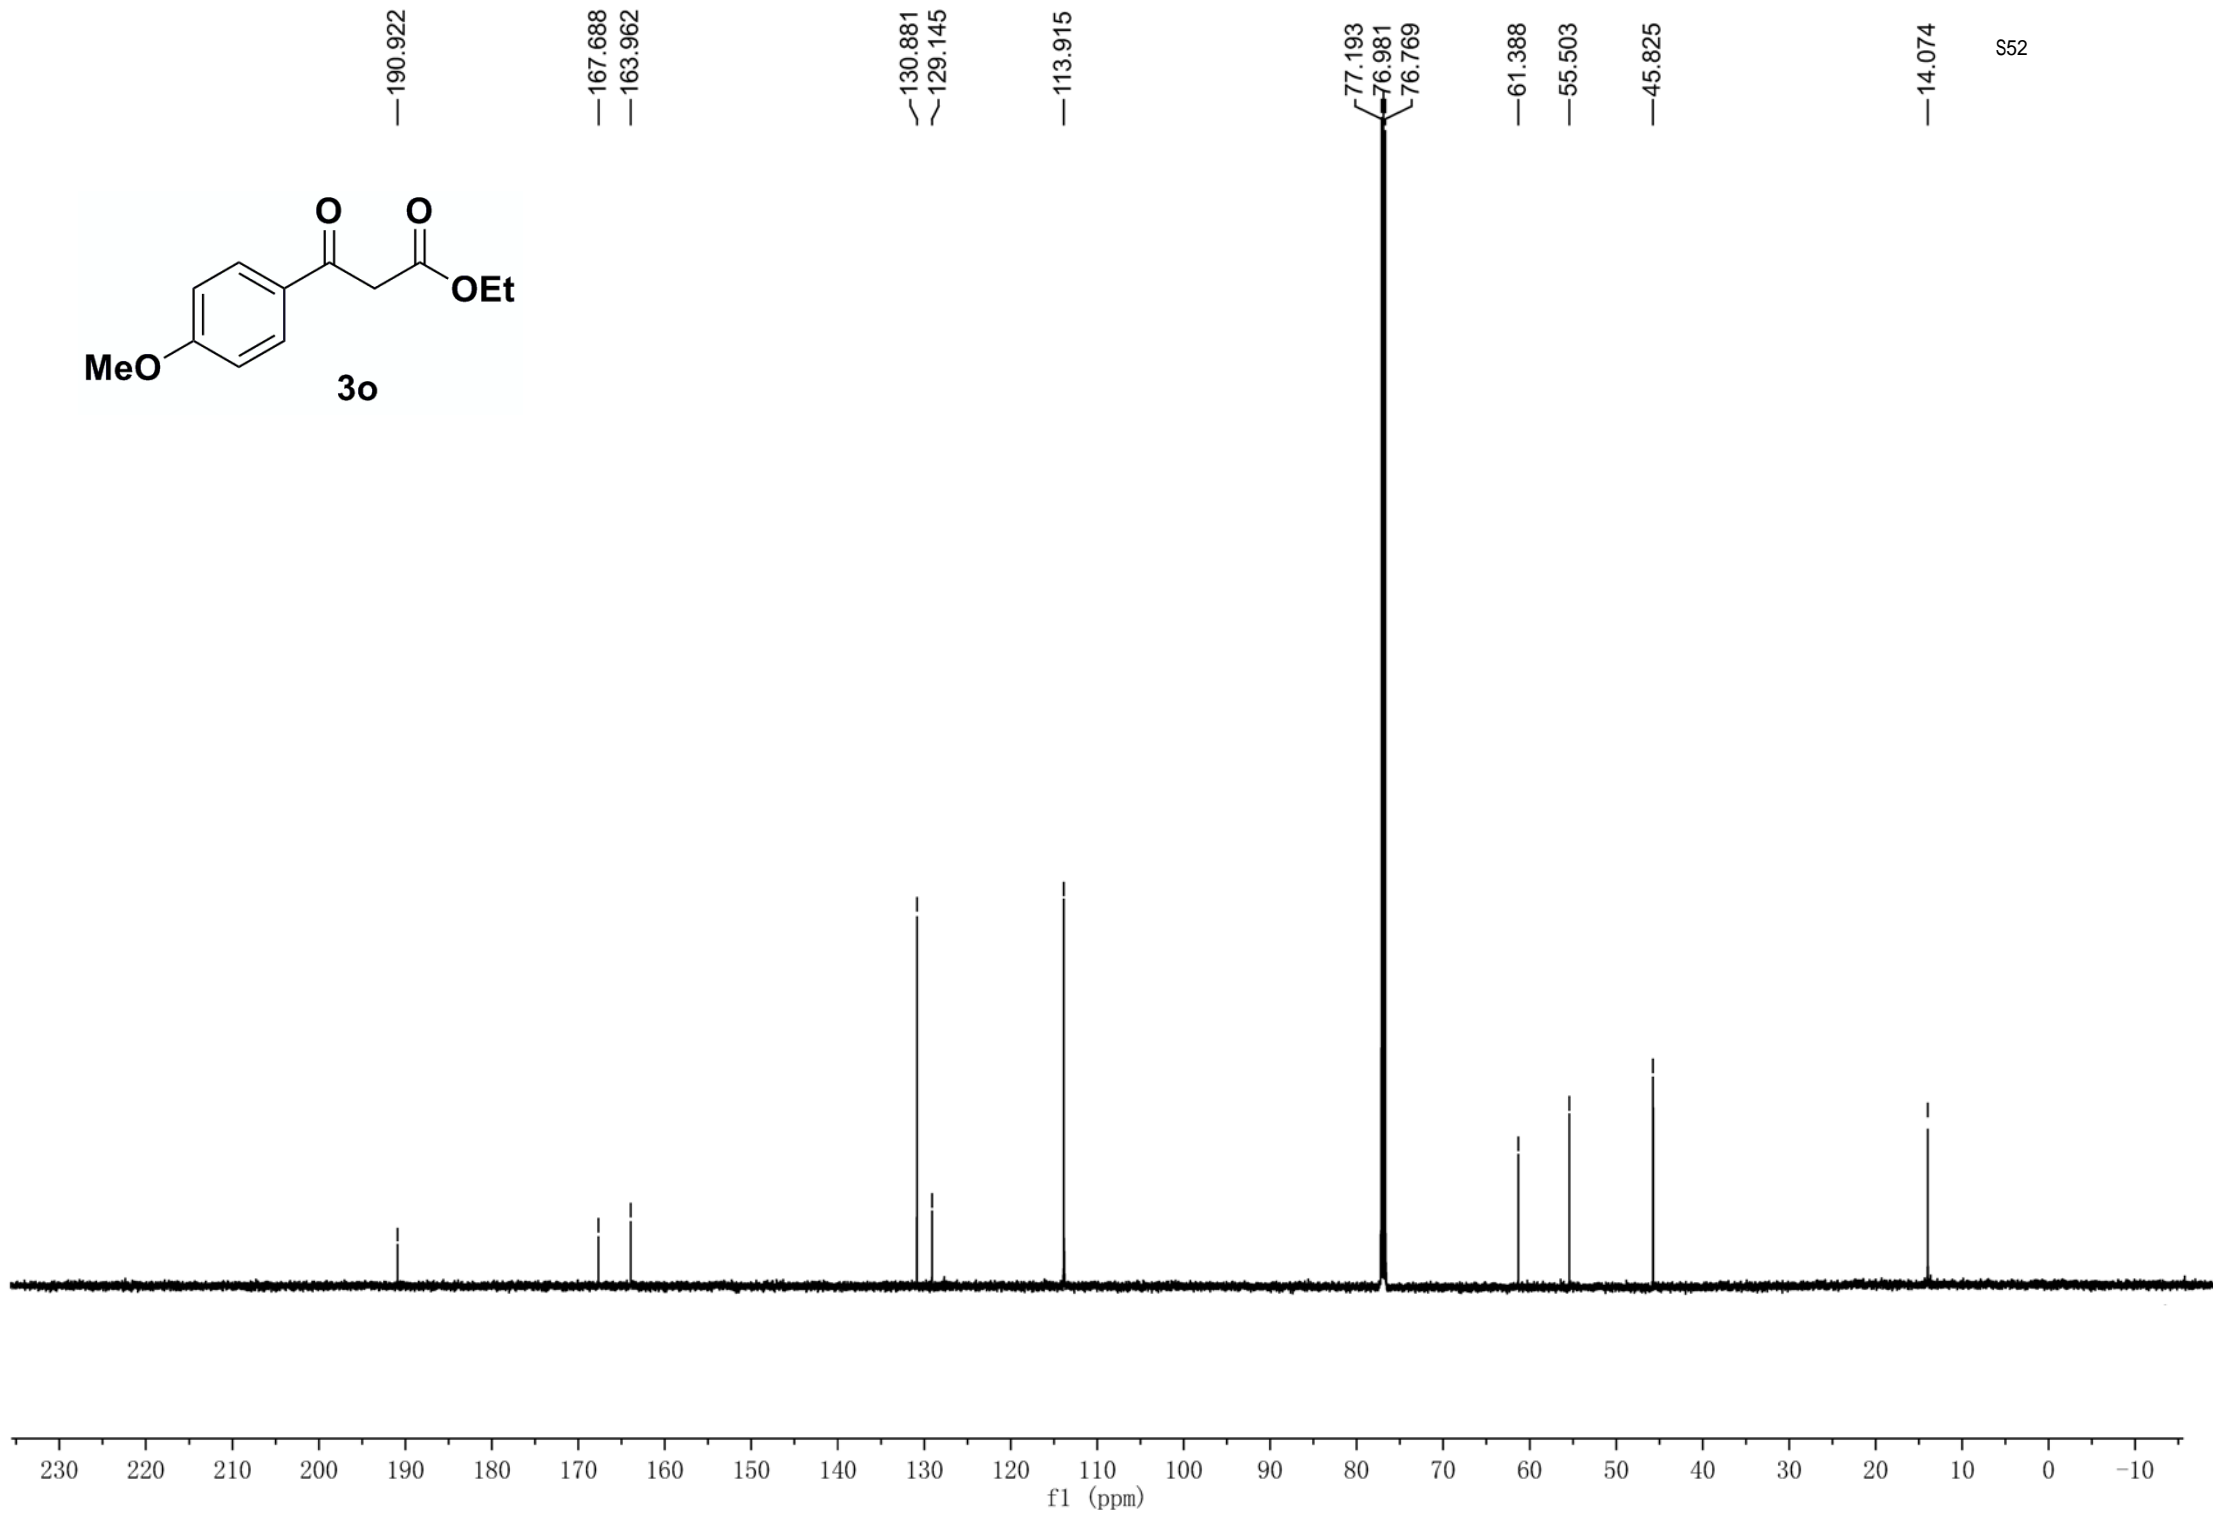

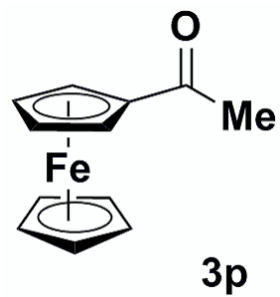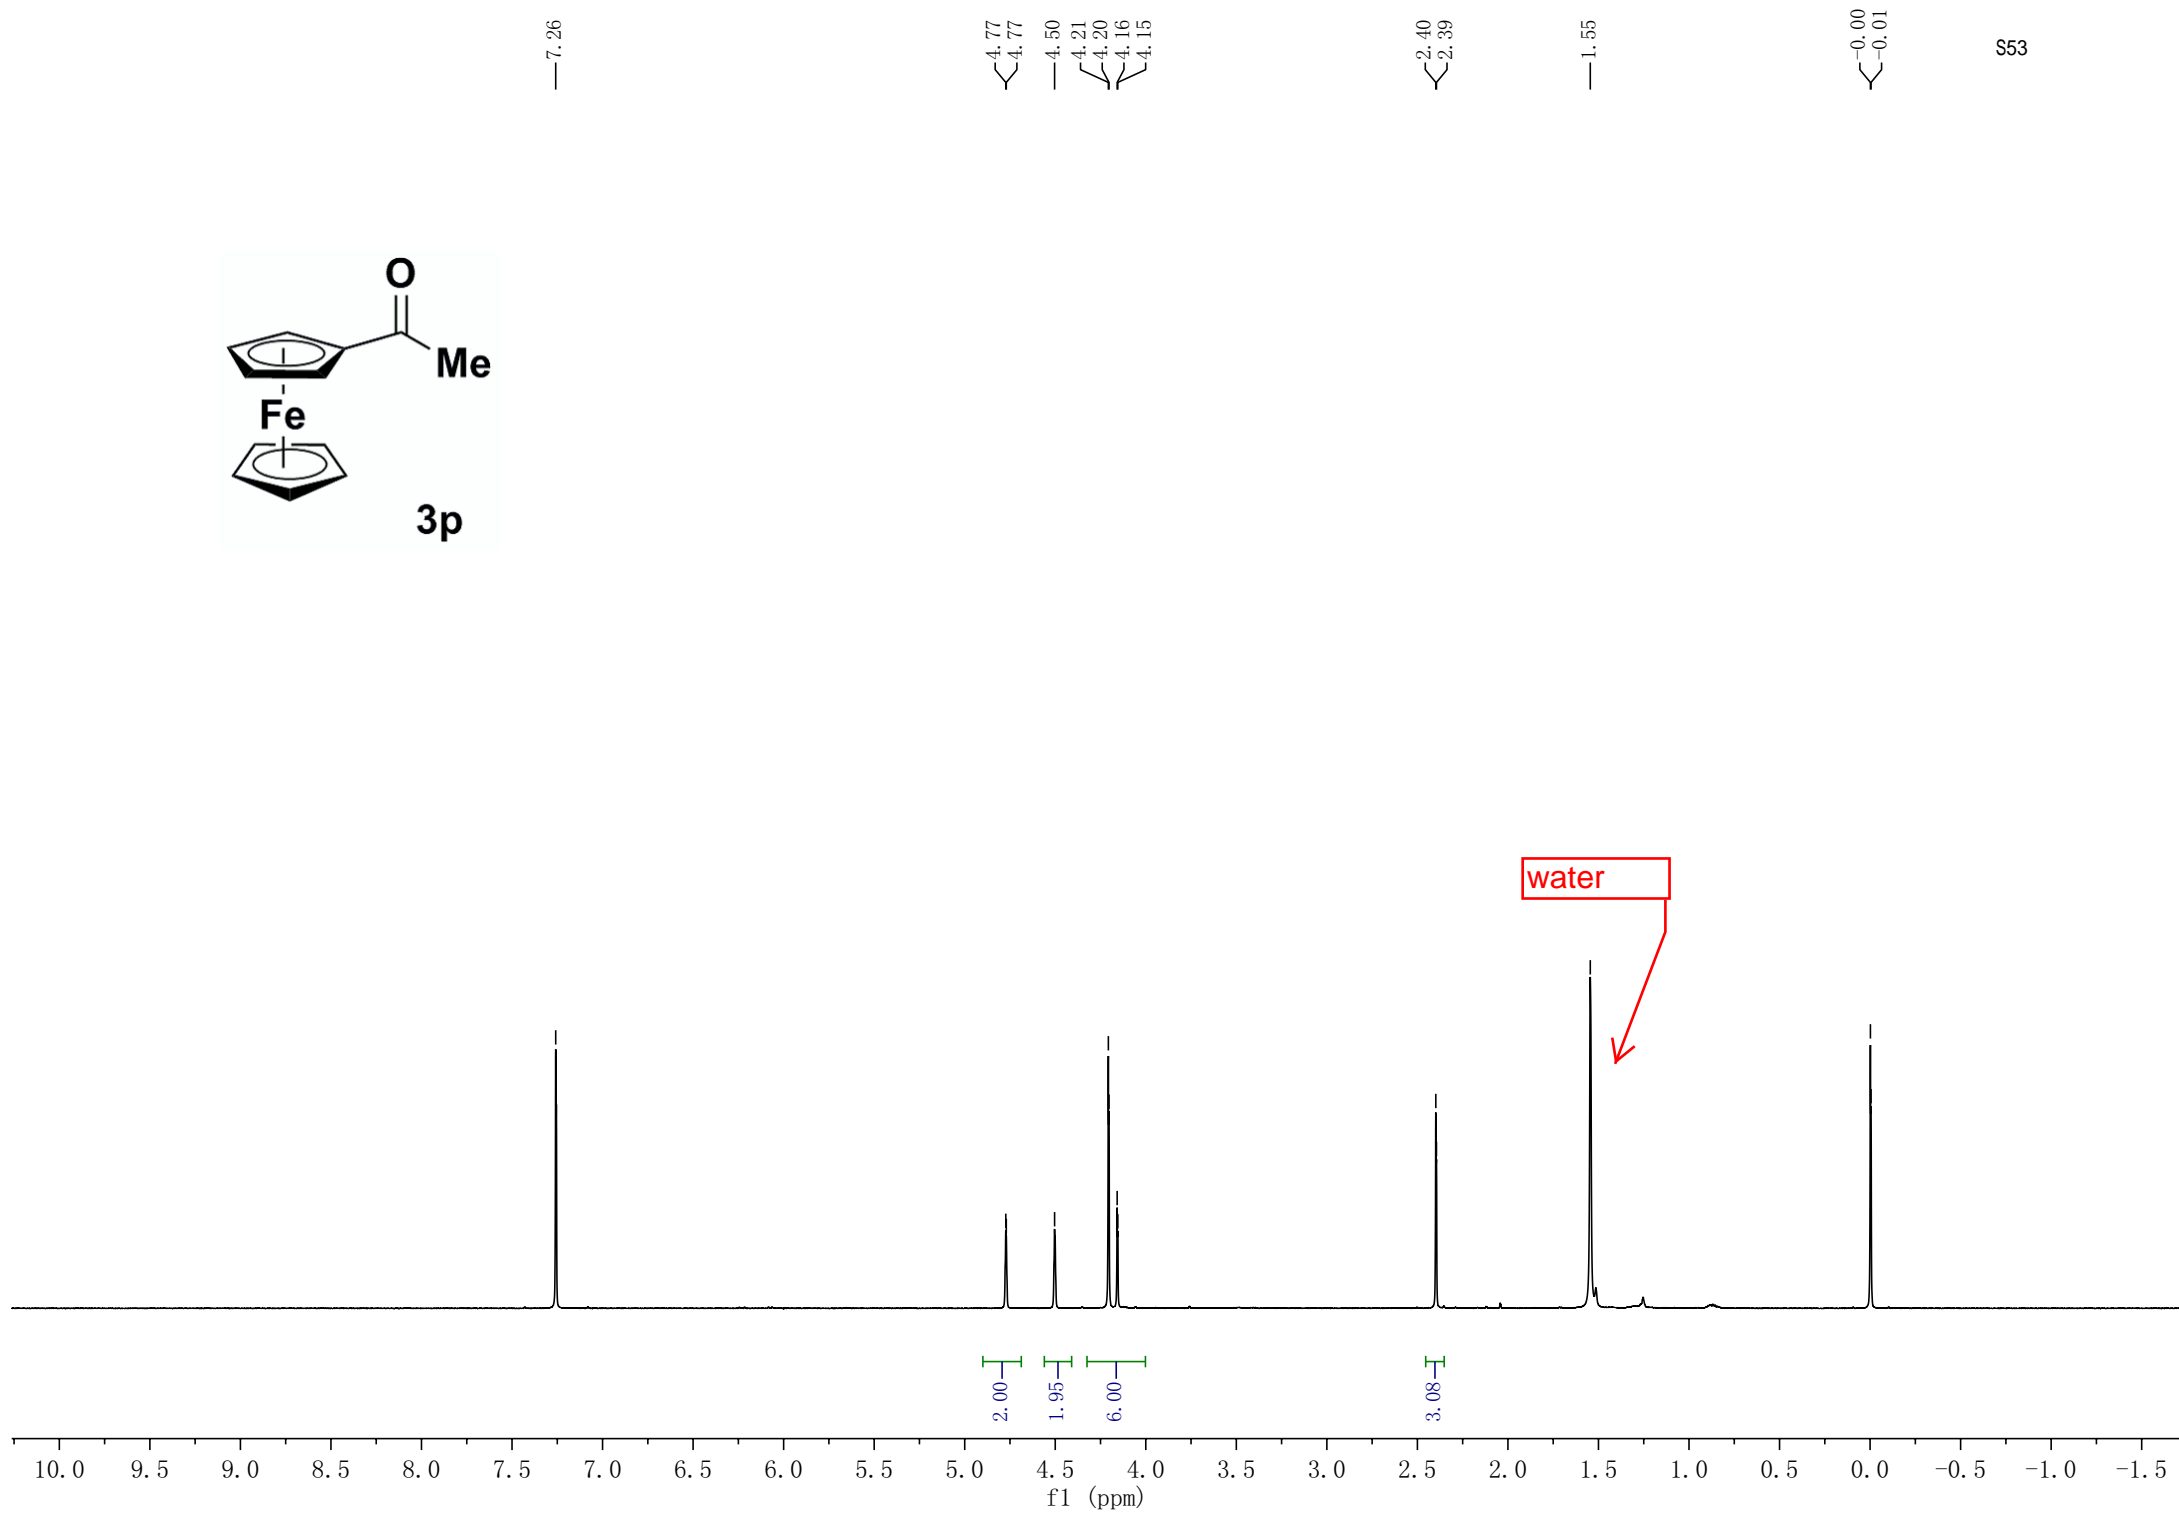

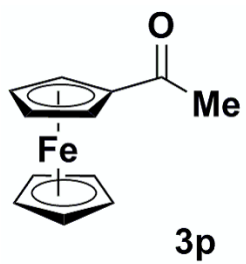

—202.00

77.19  
76.98  
76.77  
72.29  
69.84  
69.59  
67.88

—27.38

S54

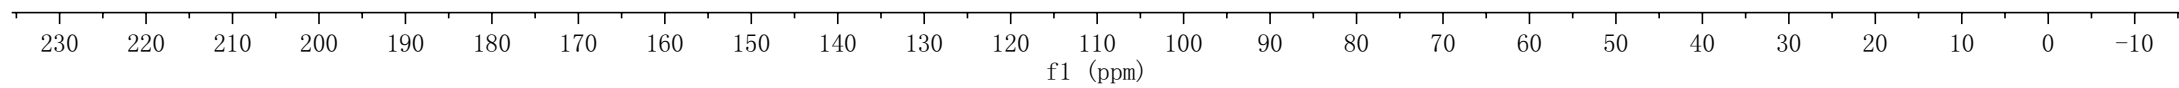

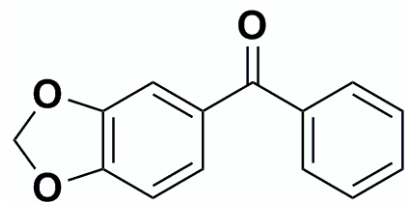

**6a**

7.76  
7.74  
7.57  
7.49  
7.47  
7.37  
7.26  
6.88  
6.86

— 6.08

— 1.58

— -0.00

S55

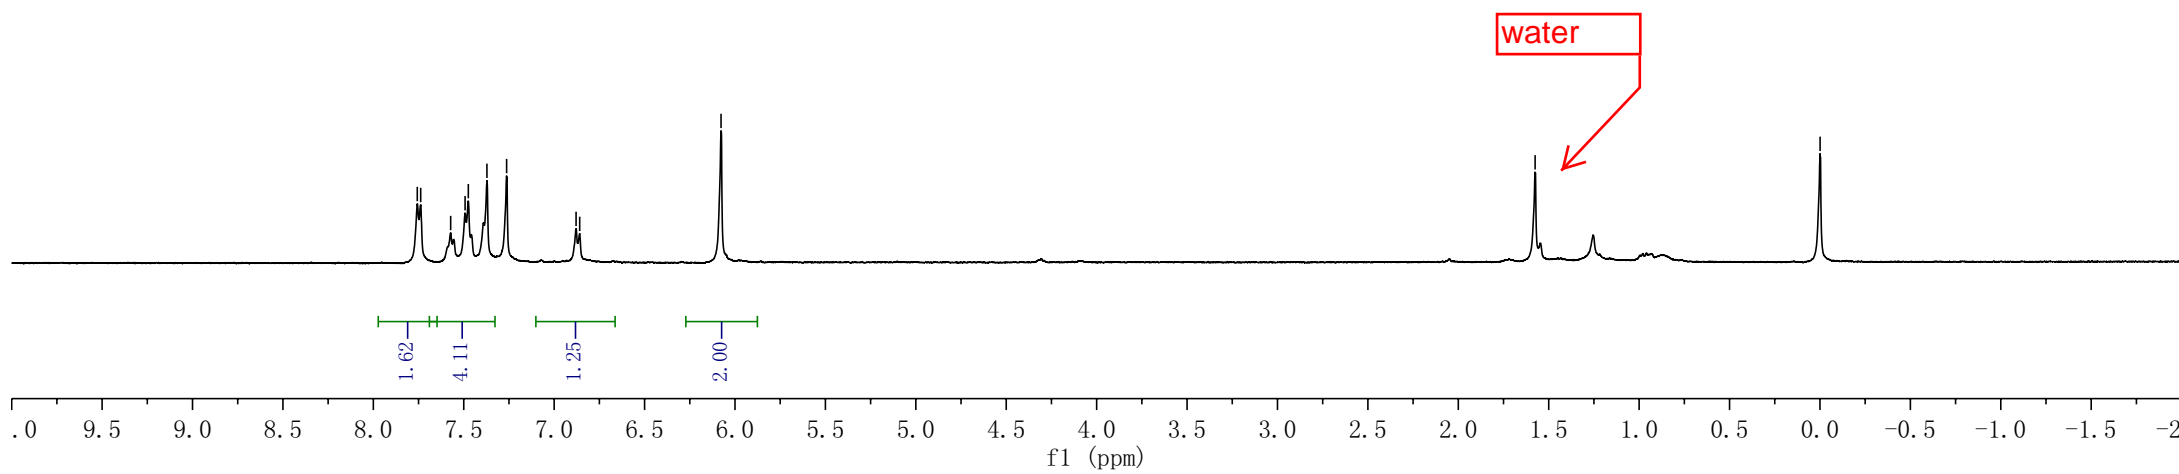

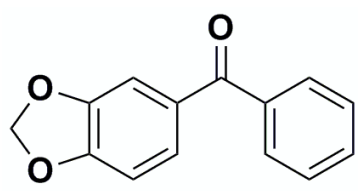

6a

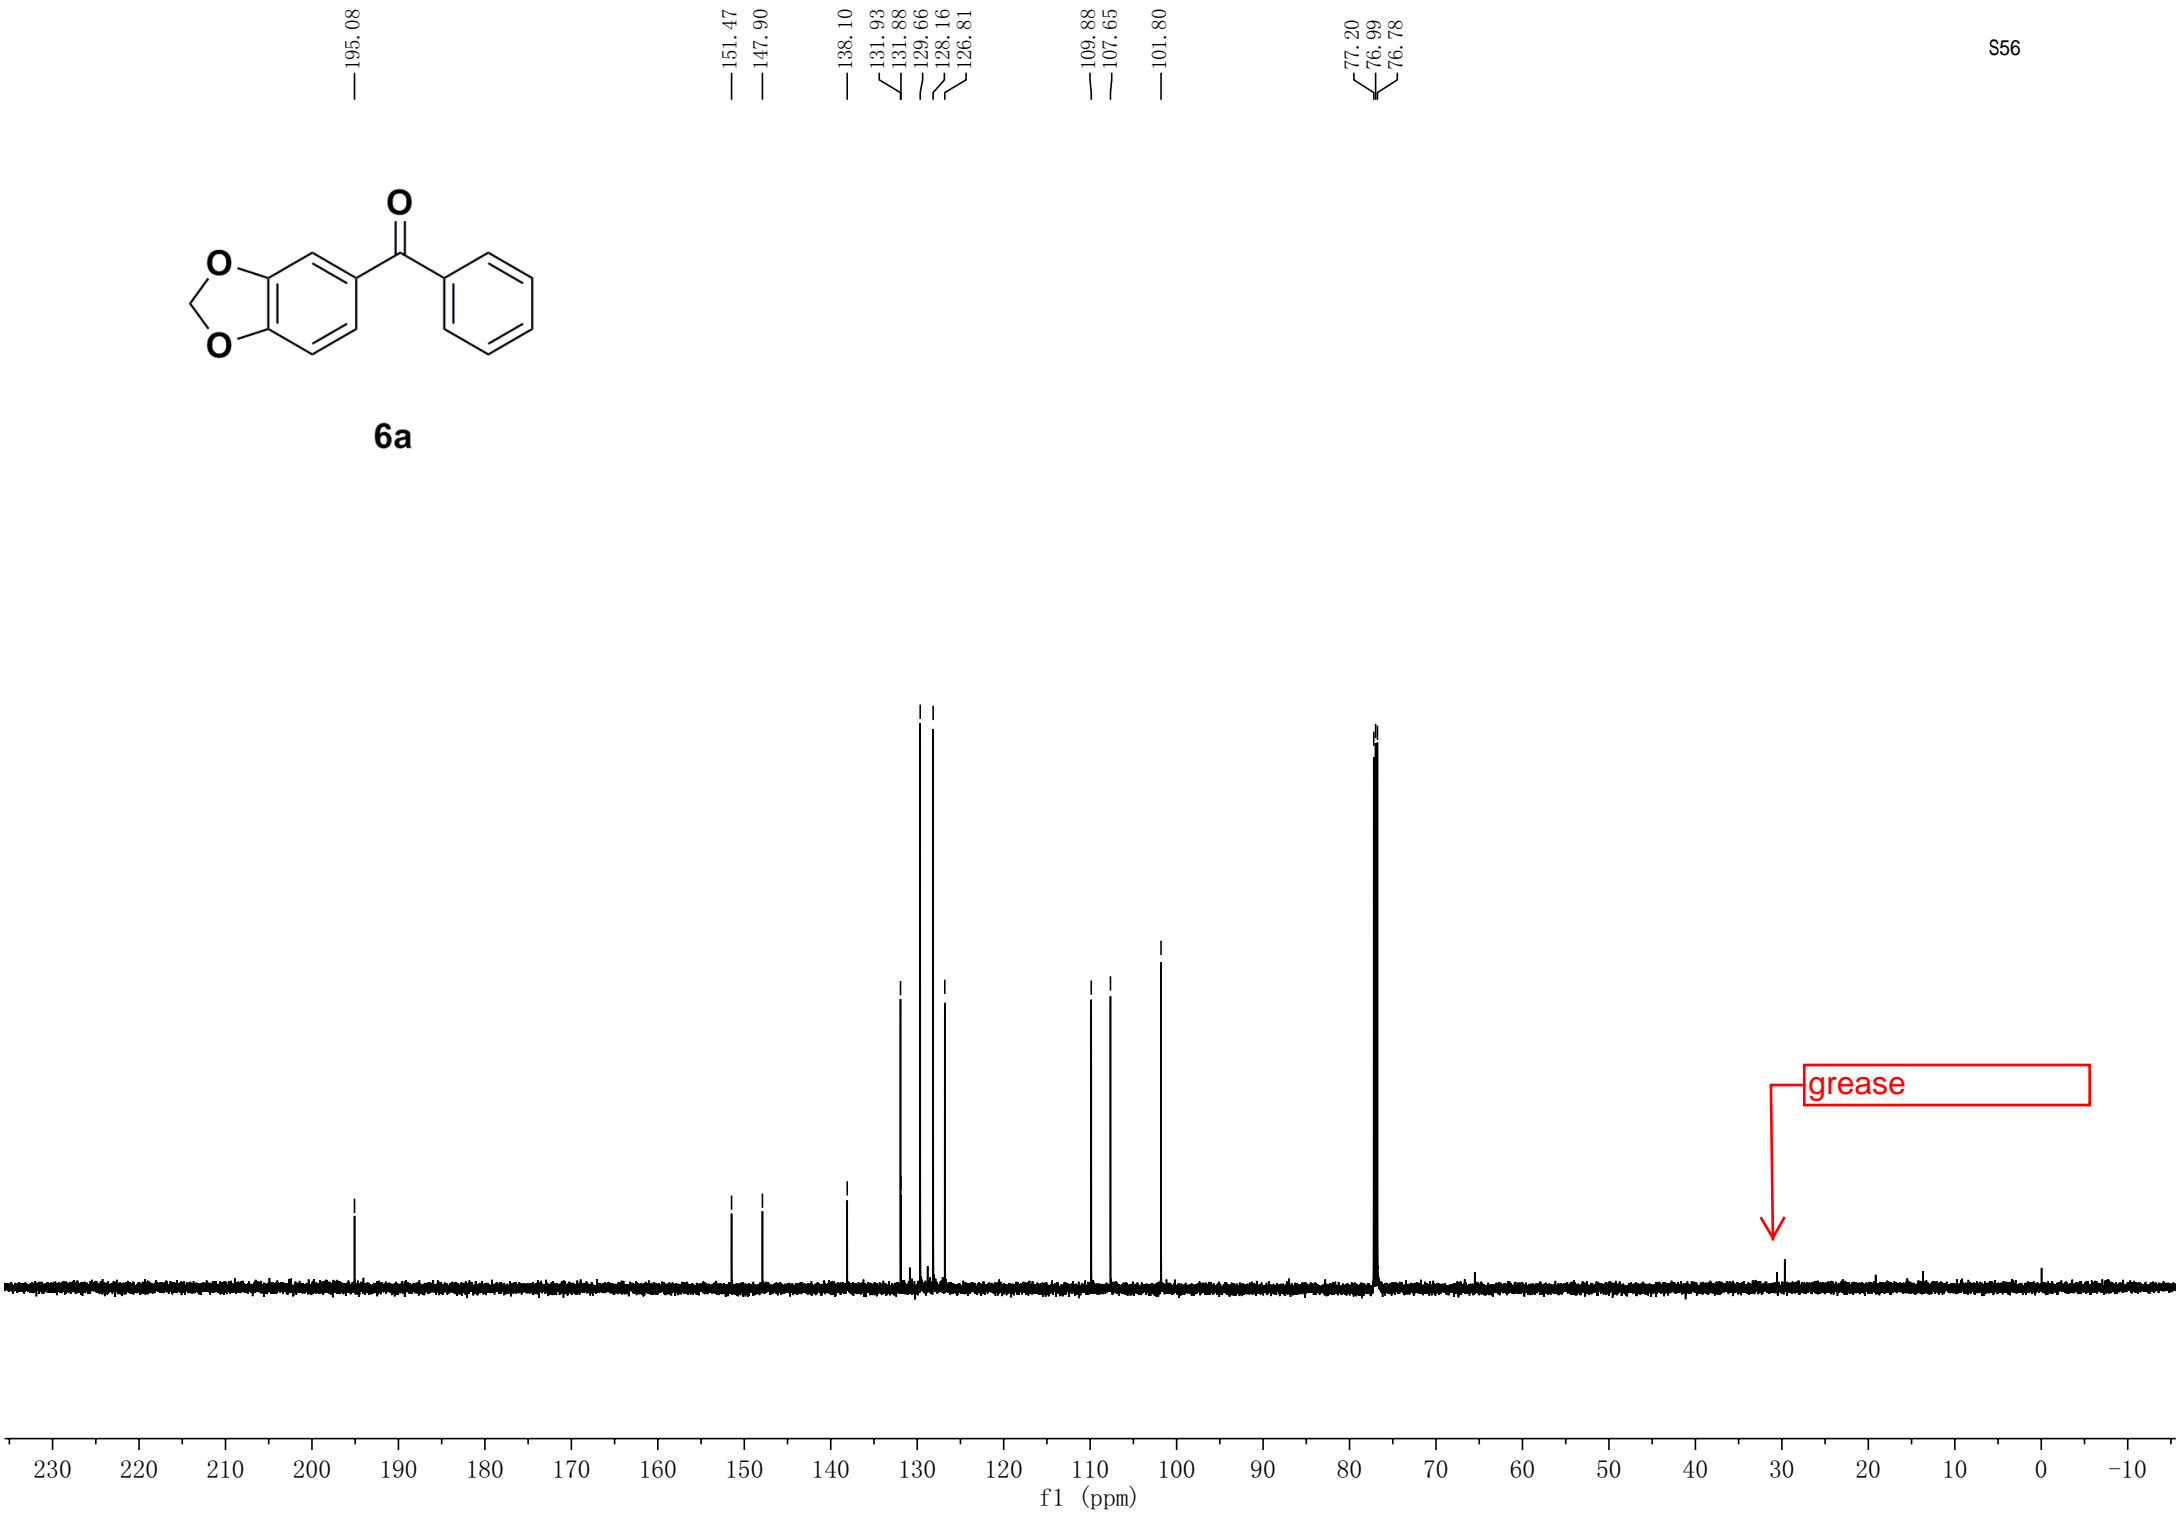

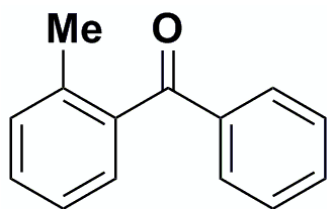

**6b**

7.81  
7.80  
7.59  
7.58  
7.57  
7.47  
7.46  
7.44  
7.41  
7.39  
7.38  
7.32  
7.31  
7.30  
7.29  
7.26  
7.25  
7.24

—2.33

—1.56

—0.00  
s57

water

2.00  
1.10  
2.22  
1.16  
0.93  
1.21  
0.67

3.36-I

9.5 9.0 8.5 8.0 7.5 7.0 6.5 6.0 5.5 5.0 4.5 4.0 3.5 3.0 2.5 2.0 1.5 1.0 0.5 0.0 -0.5 -1  
f1 (ppm)

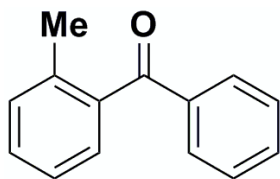

**6b**

— 198.60

138.61  
137.73  
136.72  
133.09  
130.96  
130.20  
130.10  
128.48  
128.43  
125.16

77.22  
77.00  
76.79

— 19.95

S58

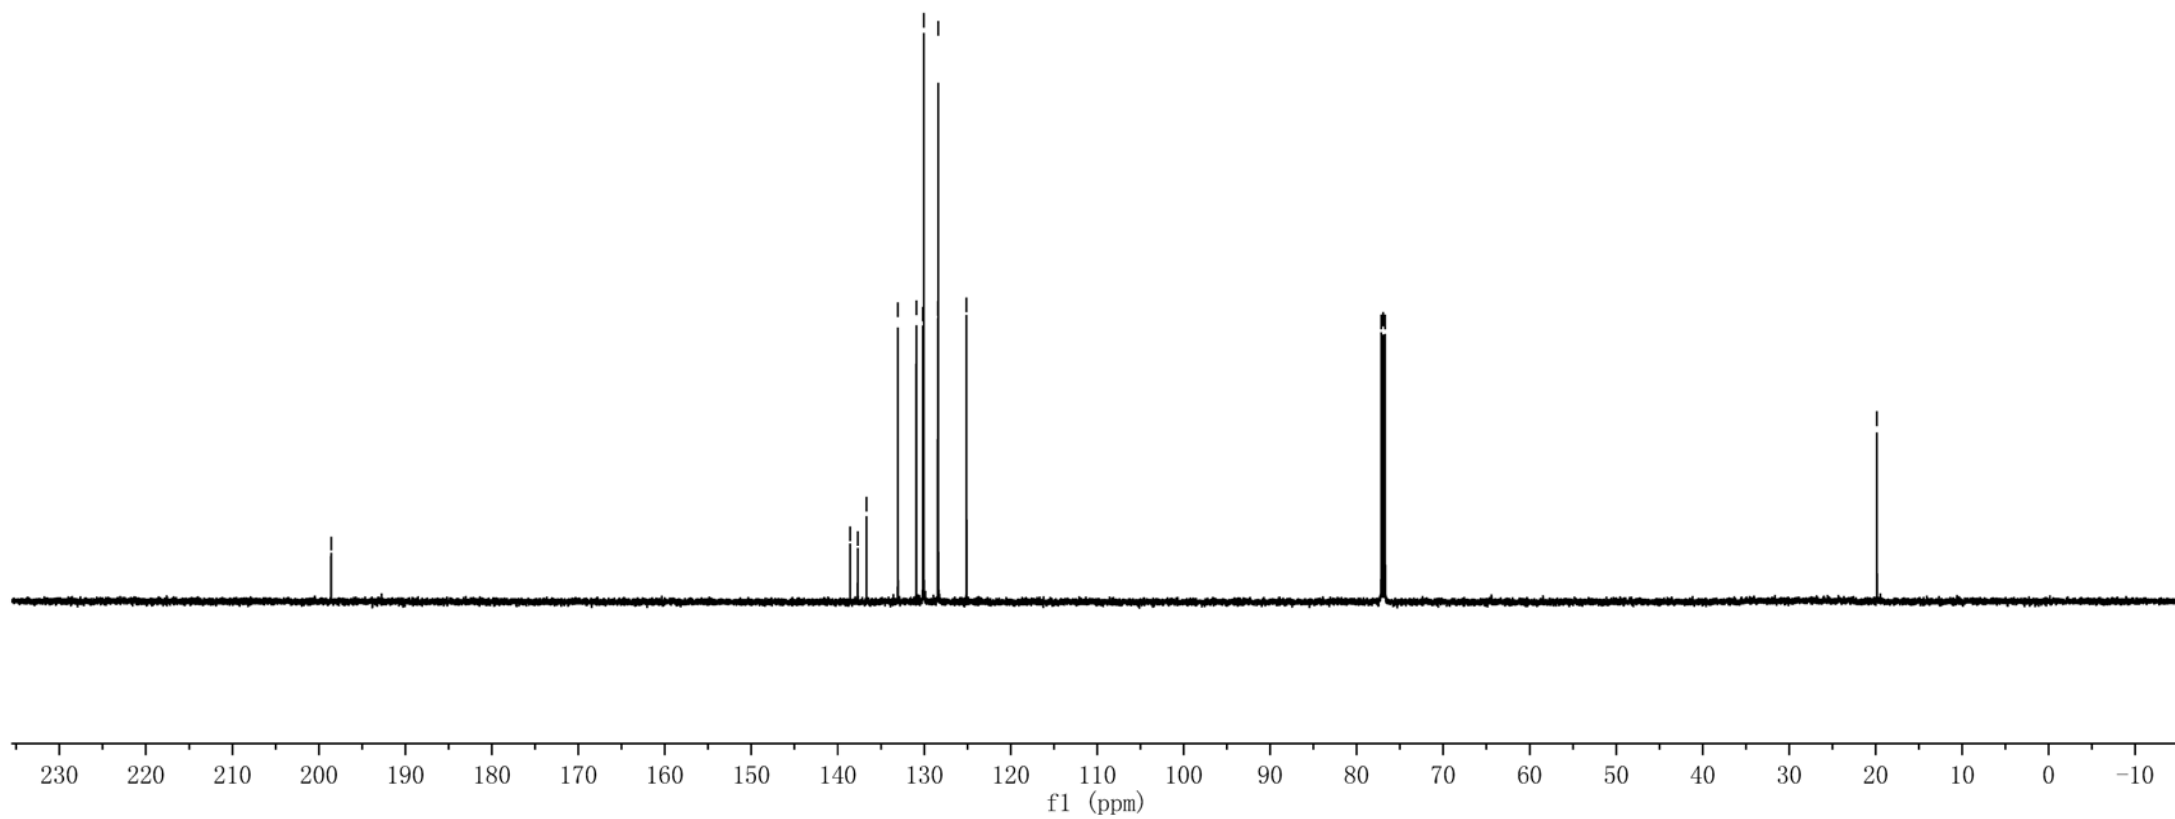

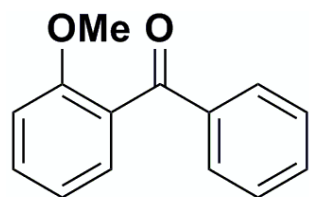

**6c**

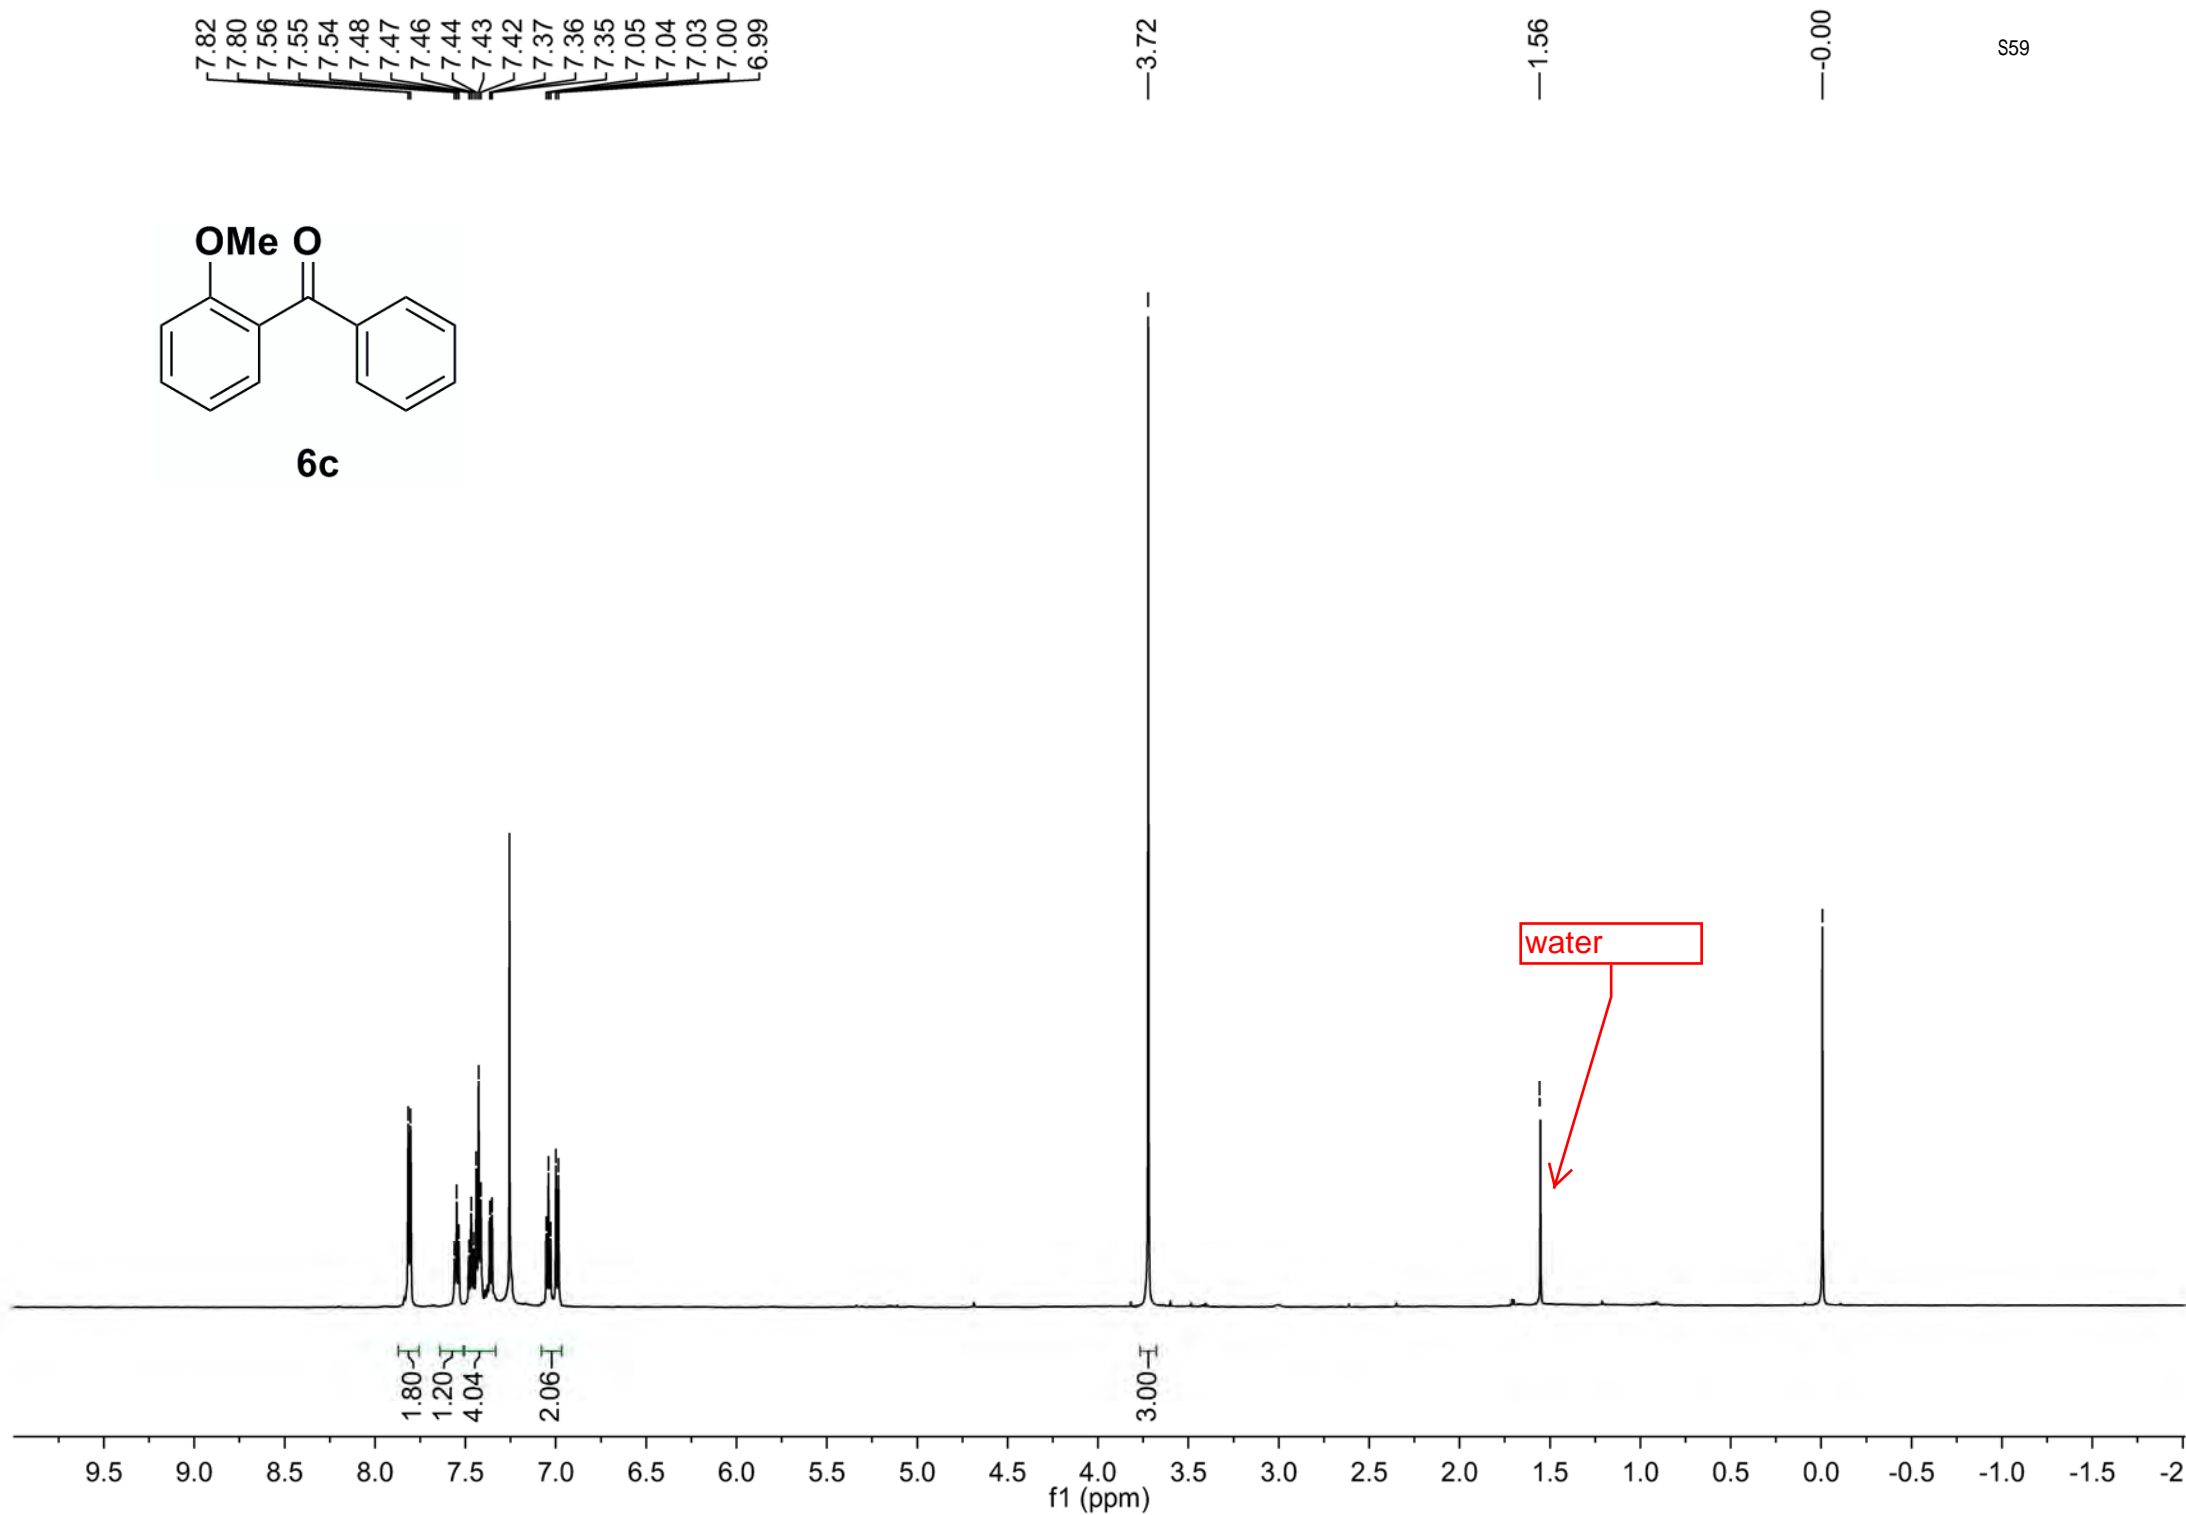

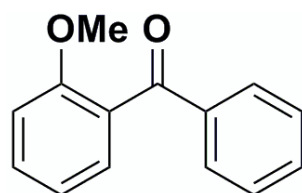

**6c**

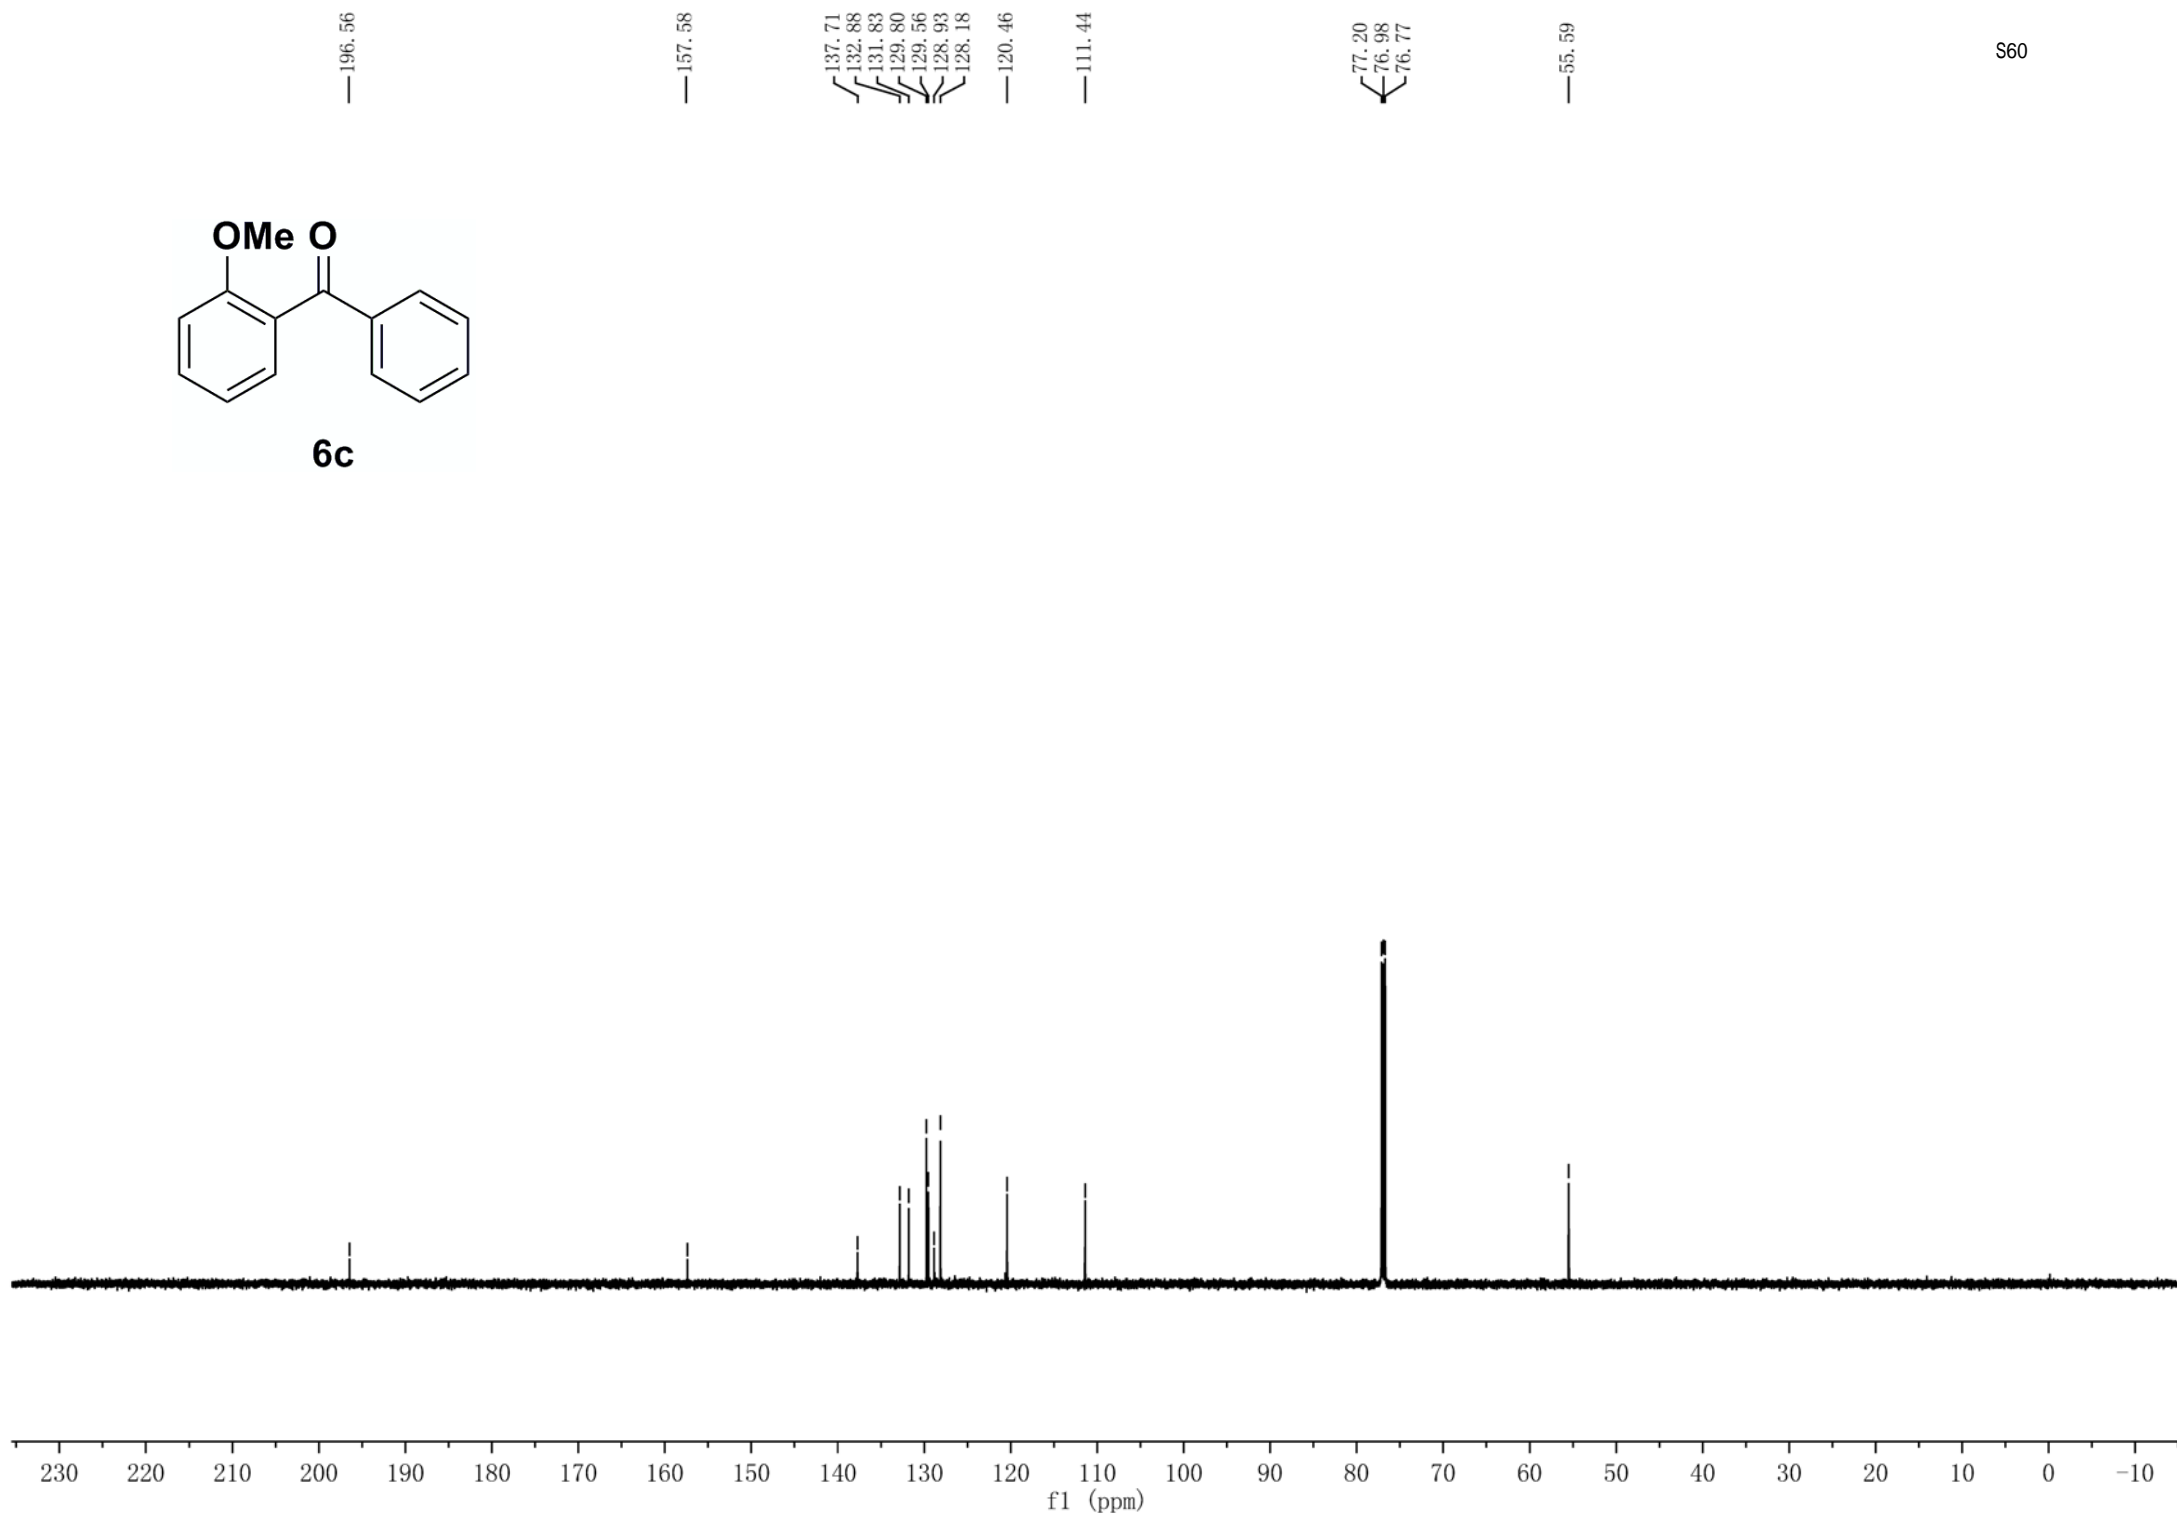

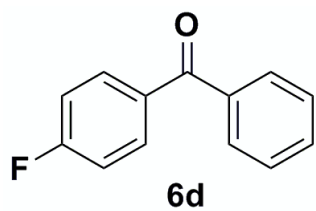

7.842  
7.827  
7.810  
7.757  
7.739  
7.592  
7.575  
7.557  
7.486  
7.468  
7.449  
7.236  
7.160  
7.139  
7.118

1.555

0.025  
0.061

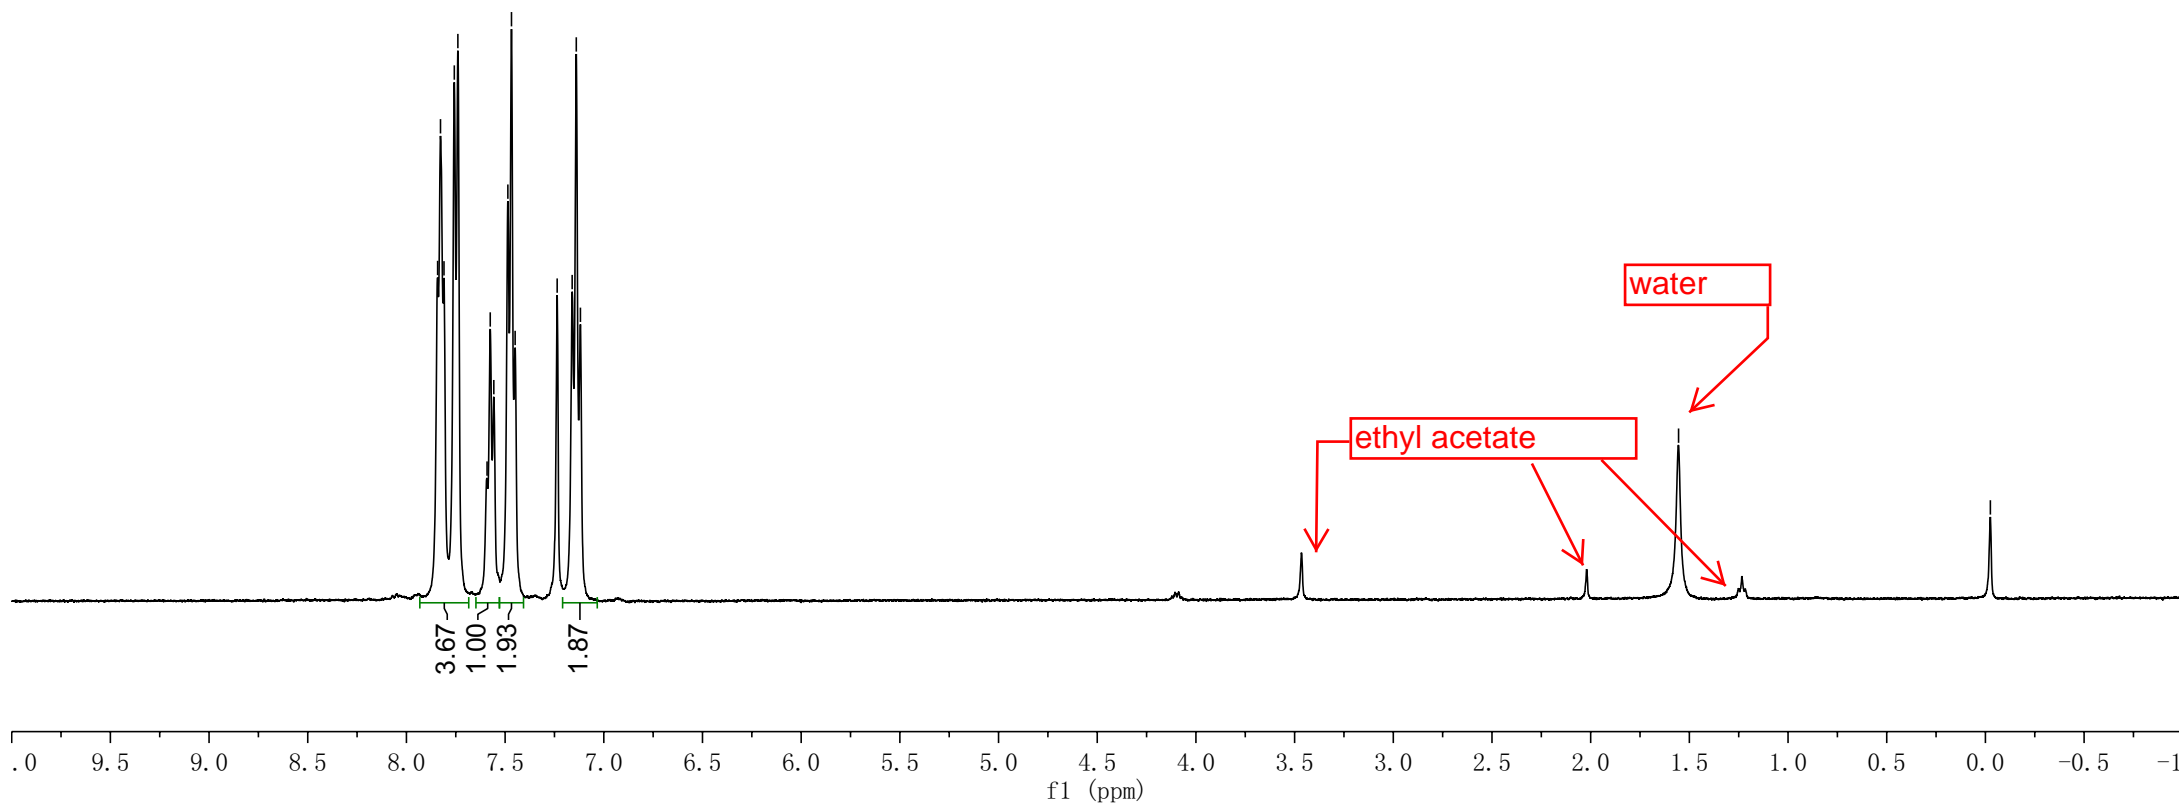

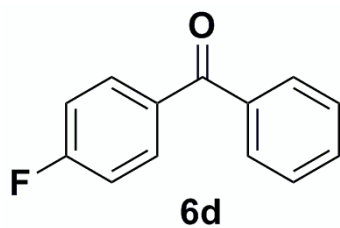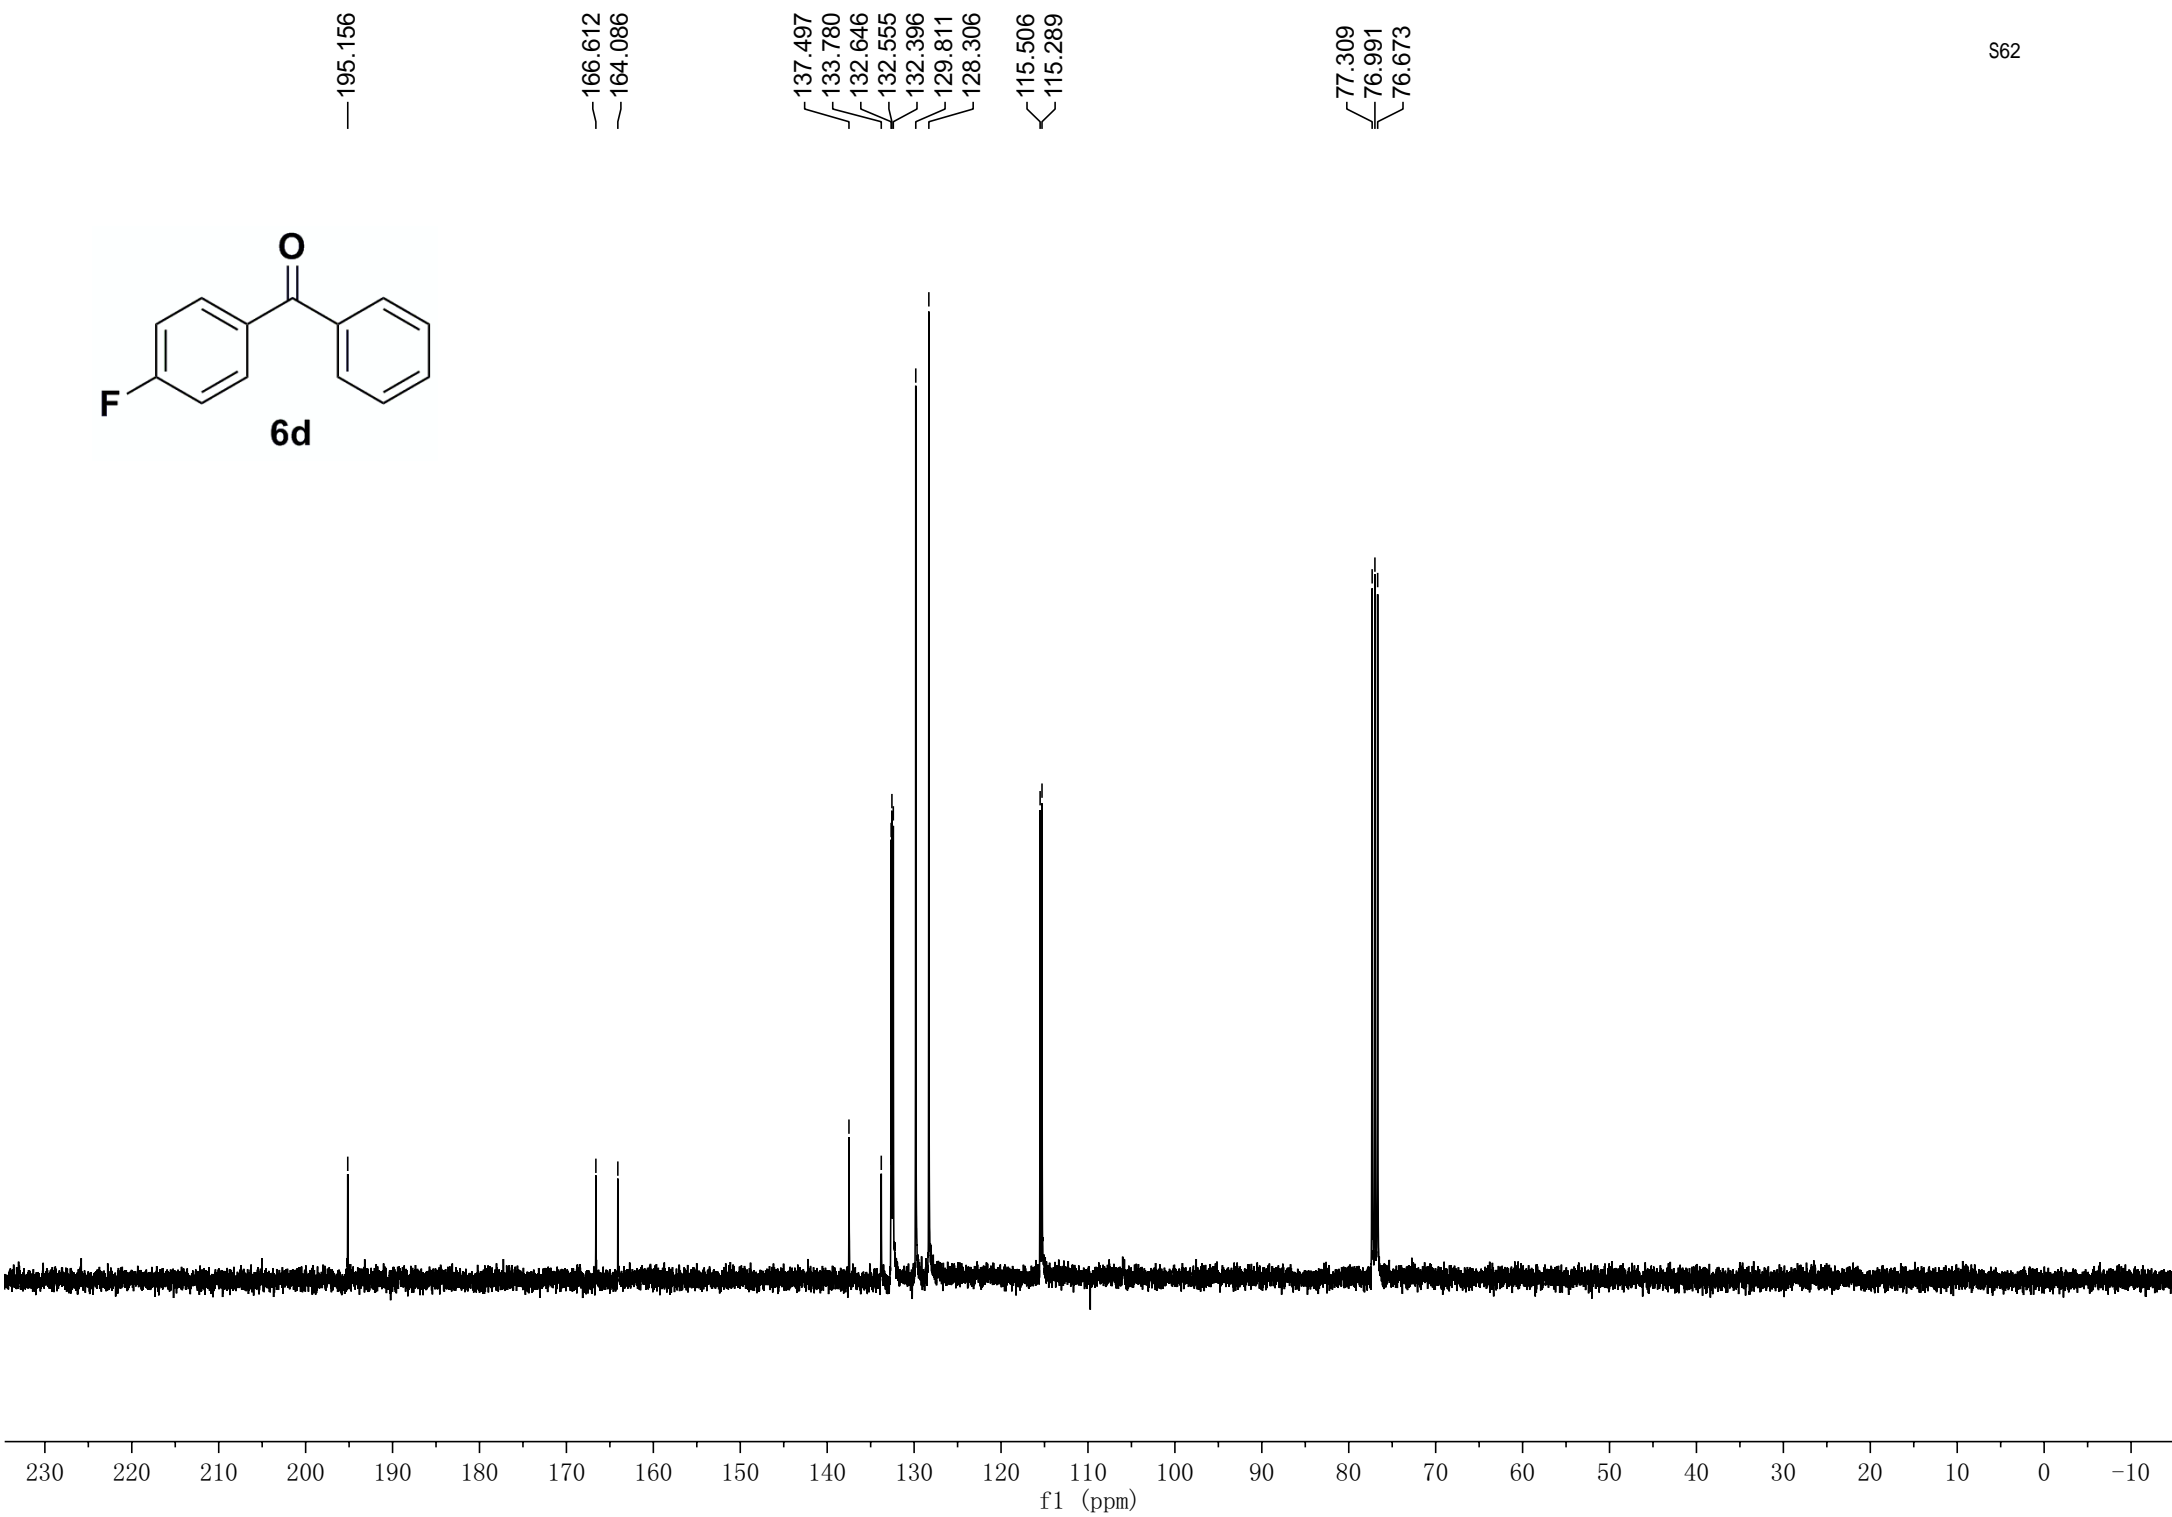

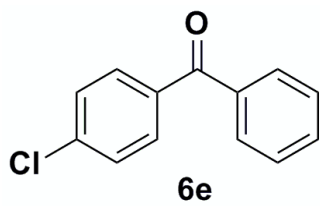

7.79  
7.77  
7.75  
7.63  
7.61  
7.59  
7.51  
7.50  
7.48  
7.46  
7.26

—1.58

—0.00  
S63

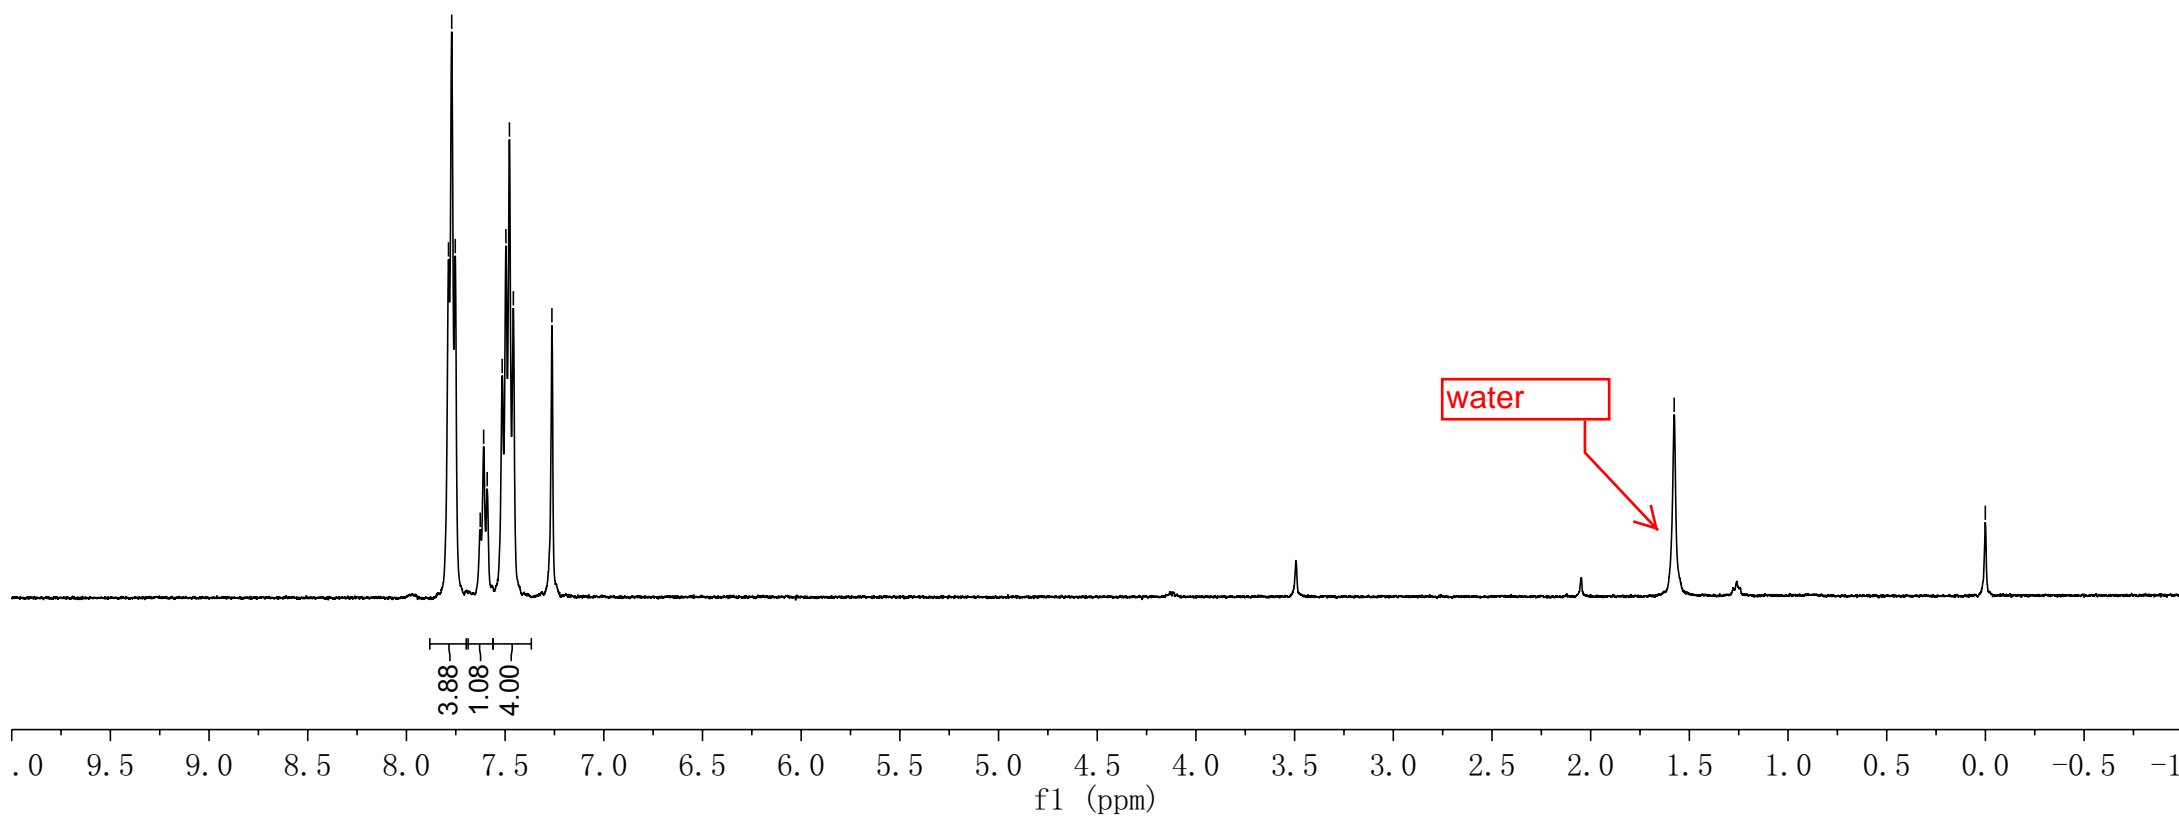

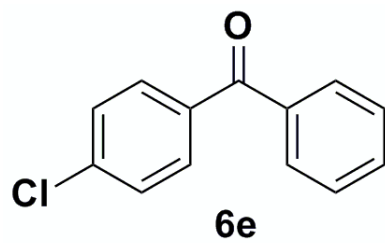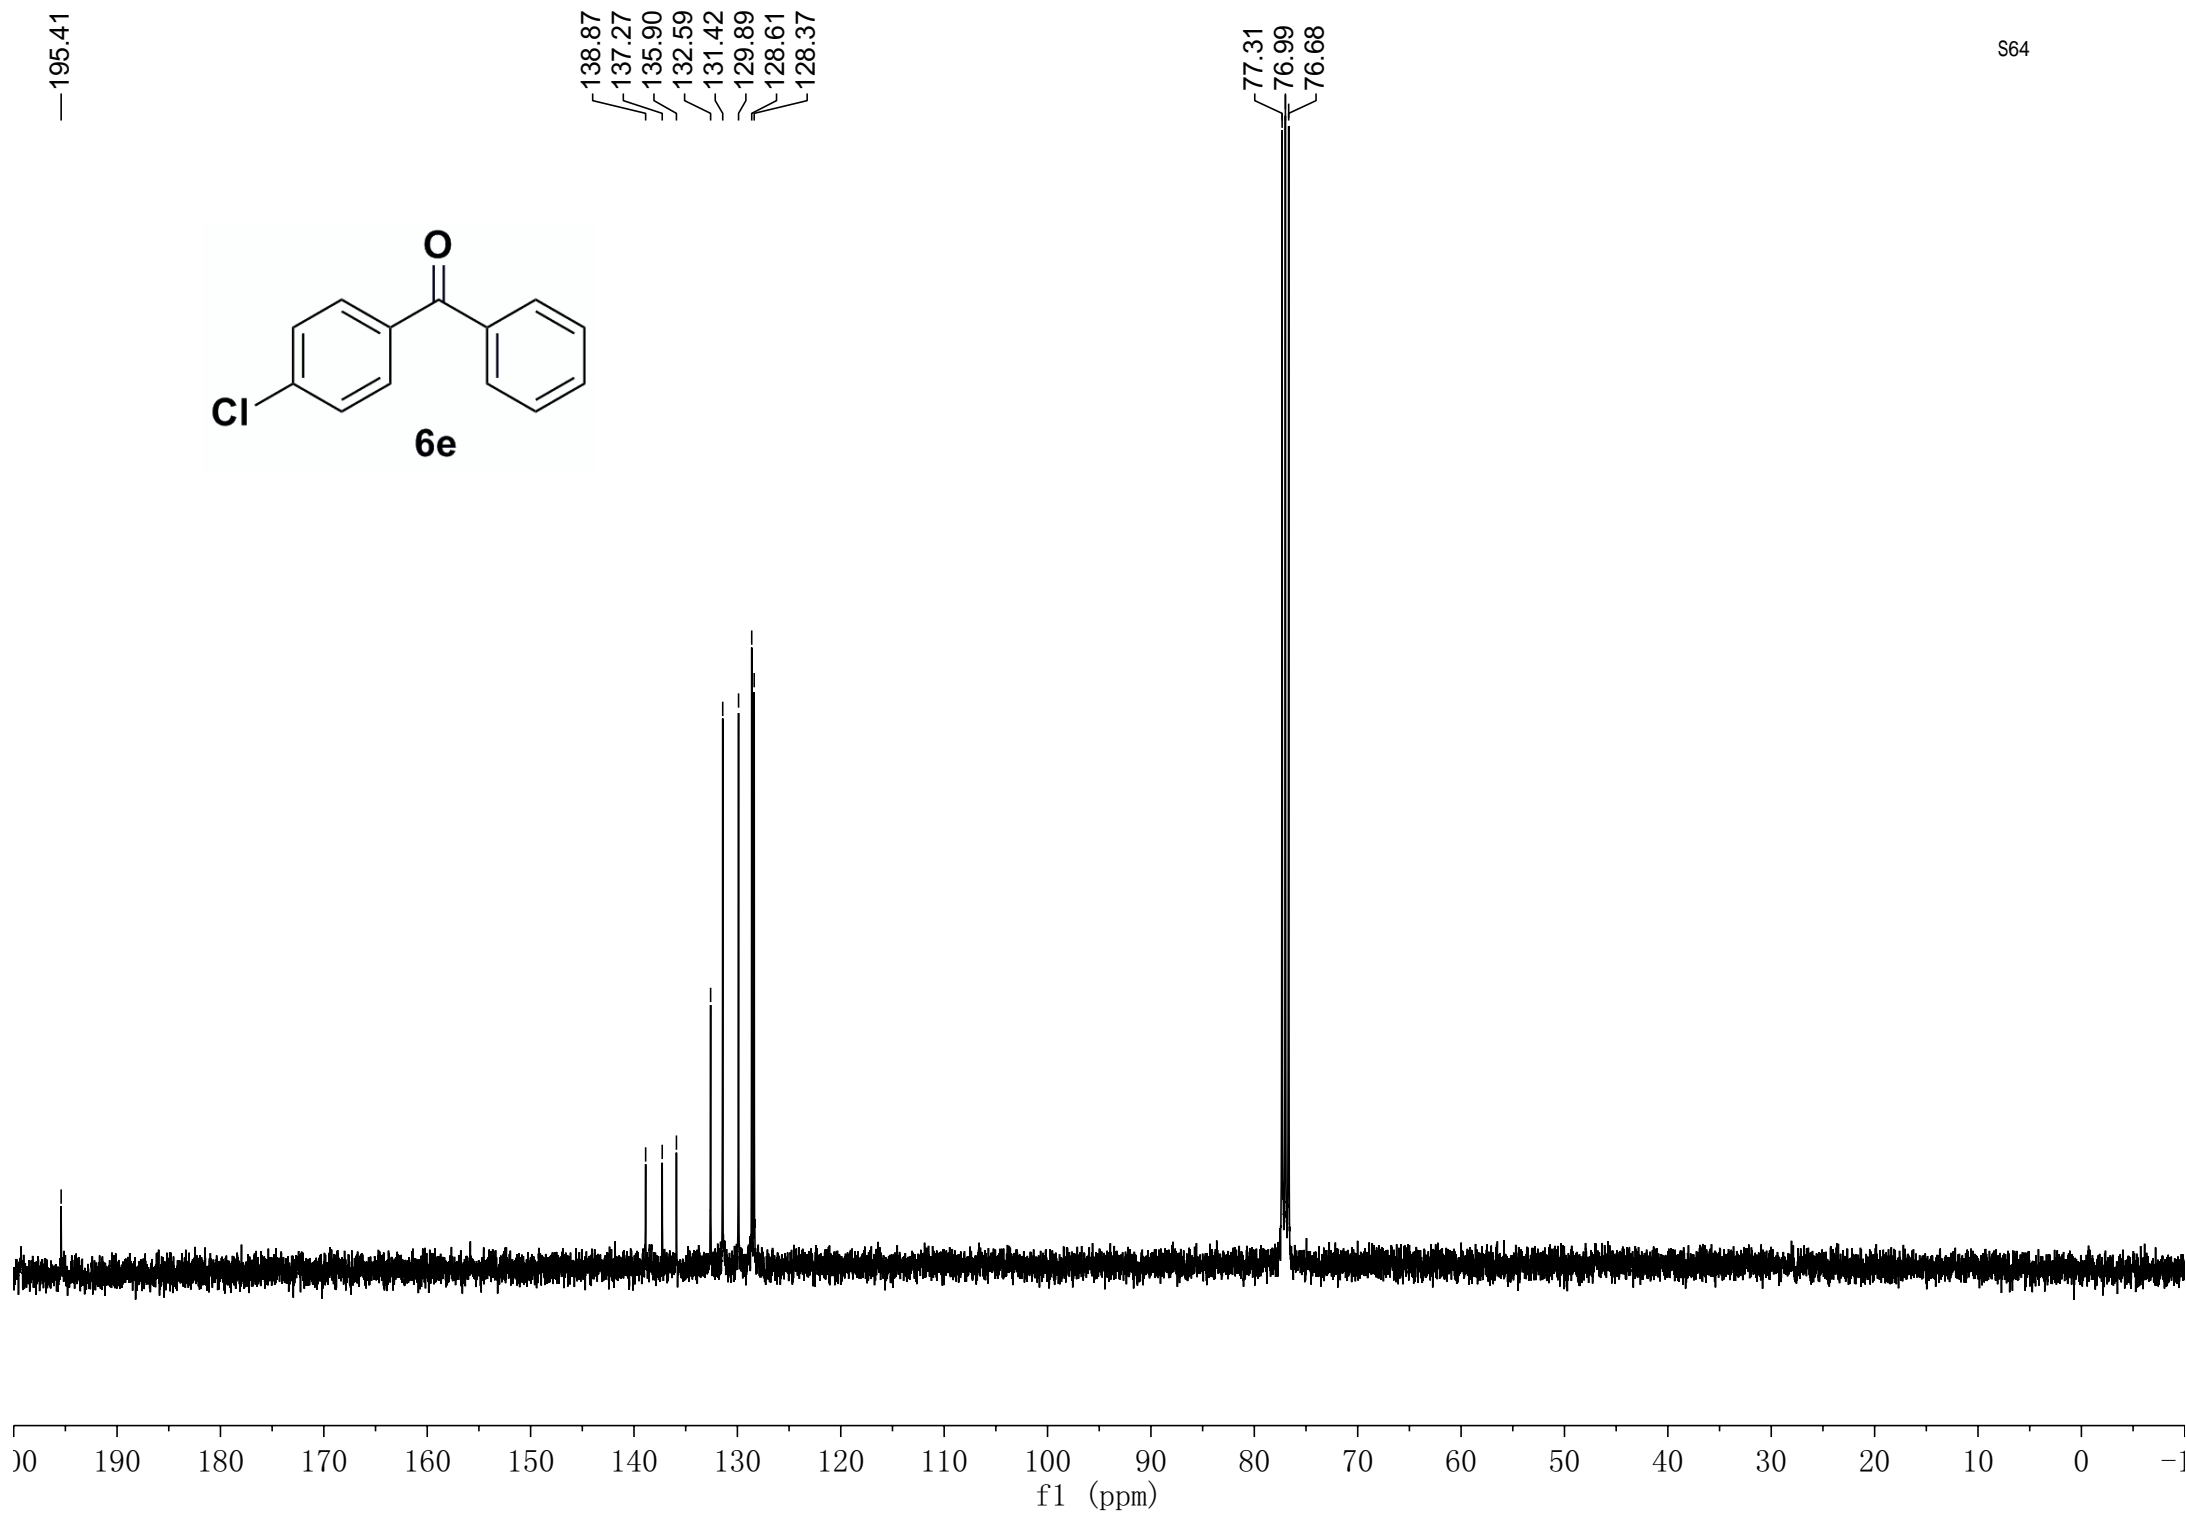

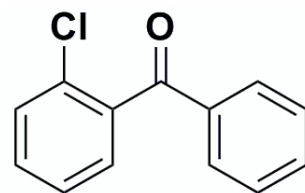

**6f**

7.830  
7.811  
7.626  
7.610  
7.592  
7.492  
7.472  
7.387  
7.263

1.570

0.000  
565

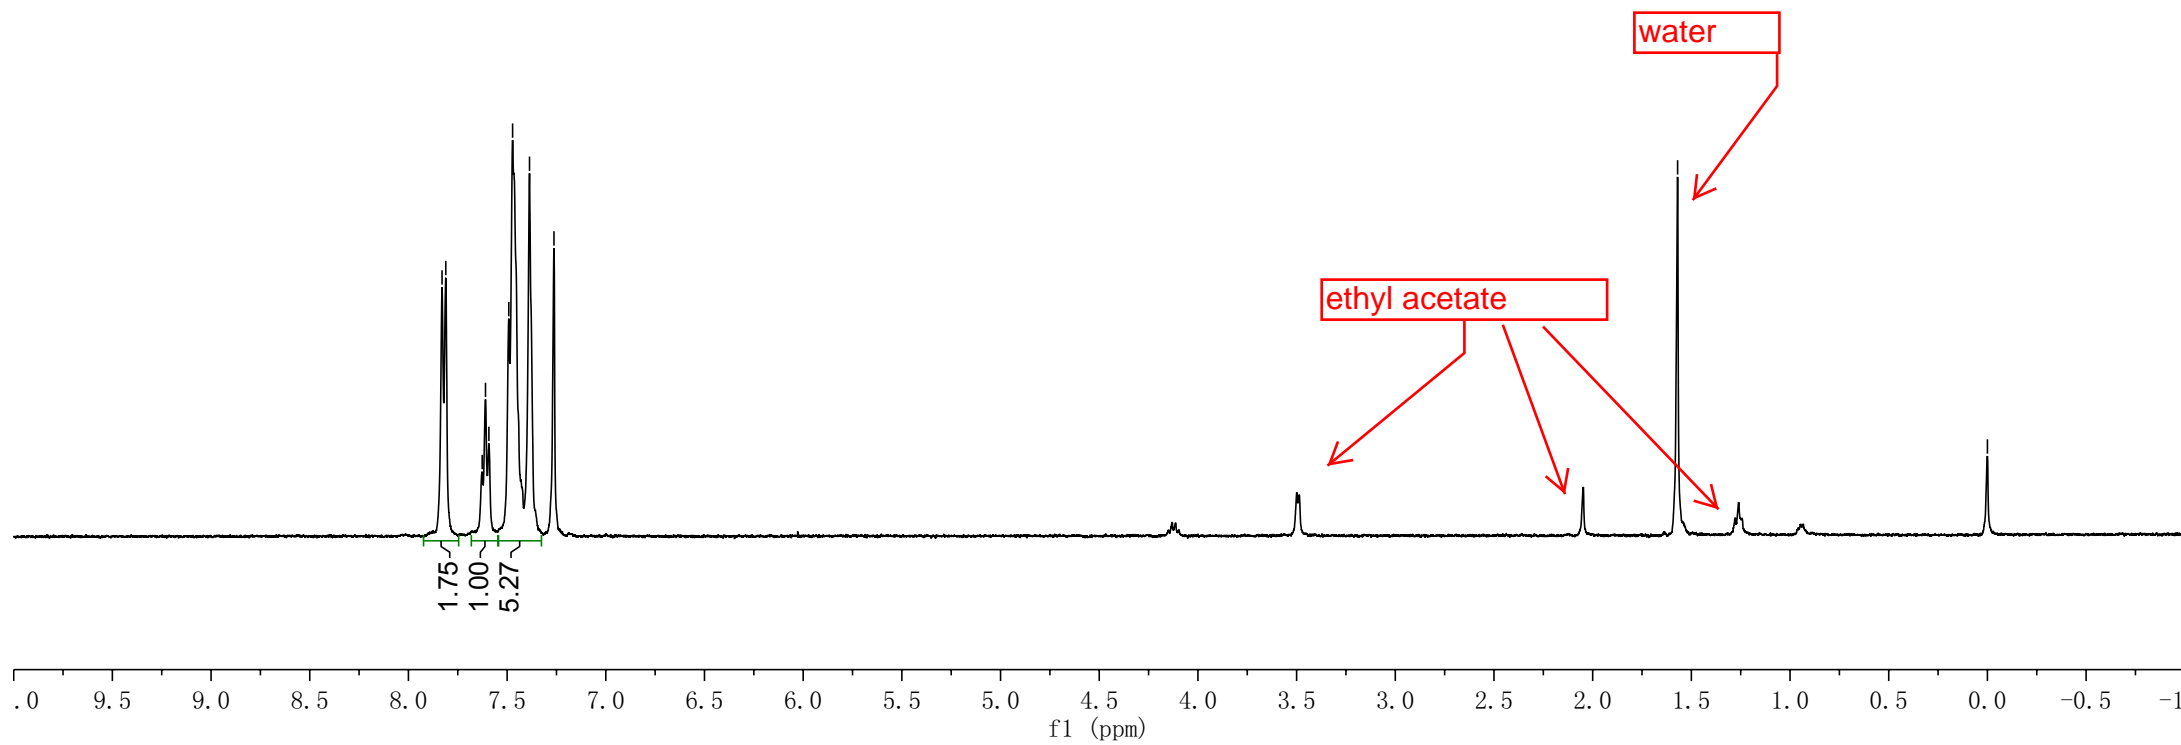

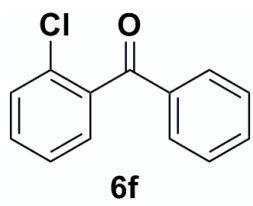

— 195.193

138.645  
136.509  
133.635  
131.319  
131.070  
130.044  
129.097  
128.577  
126.638

77.309  
76.991  
76.674

S66

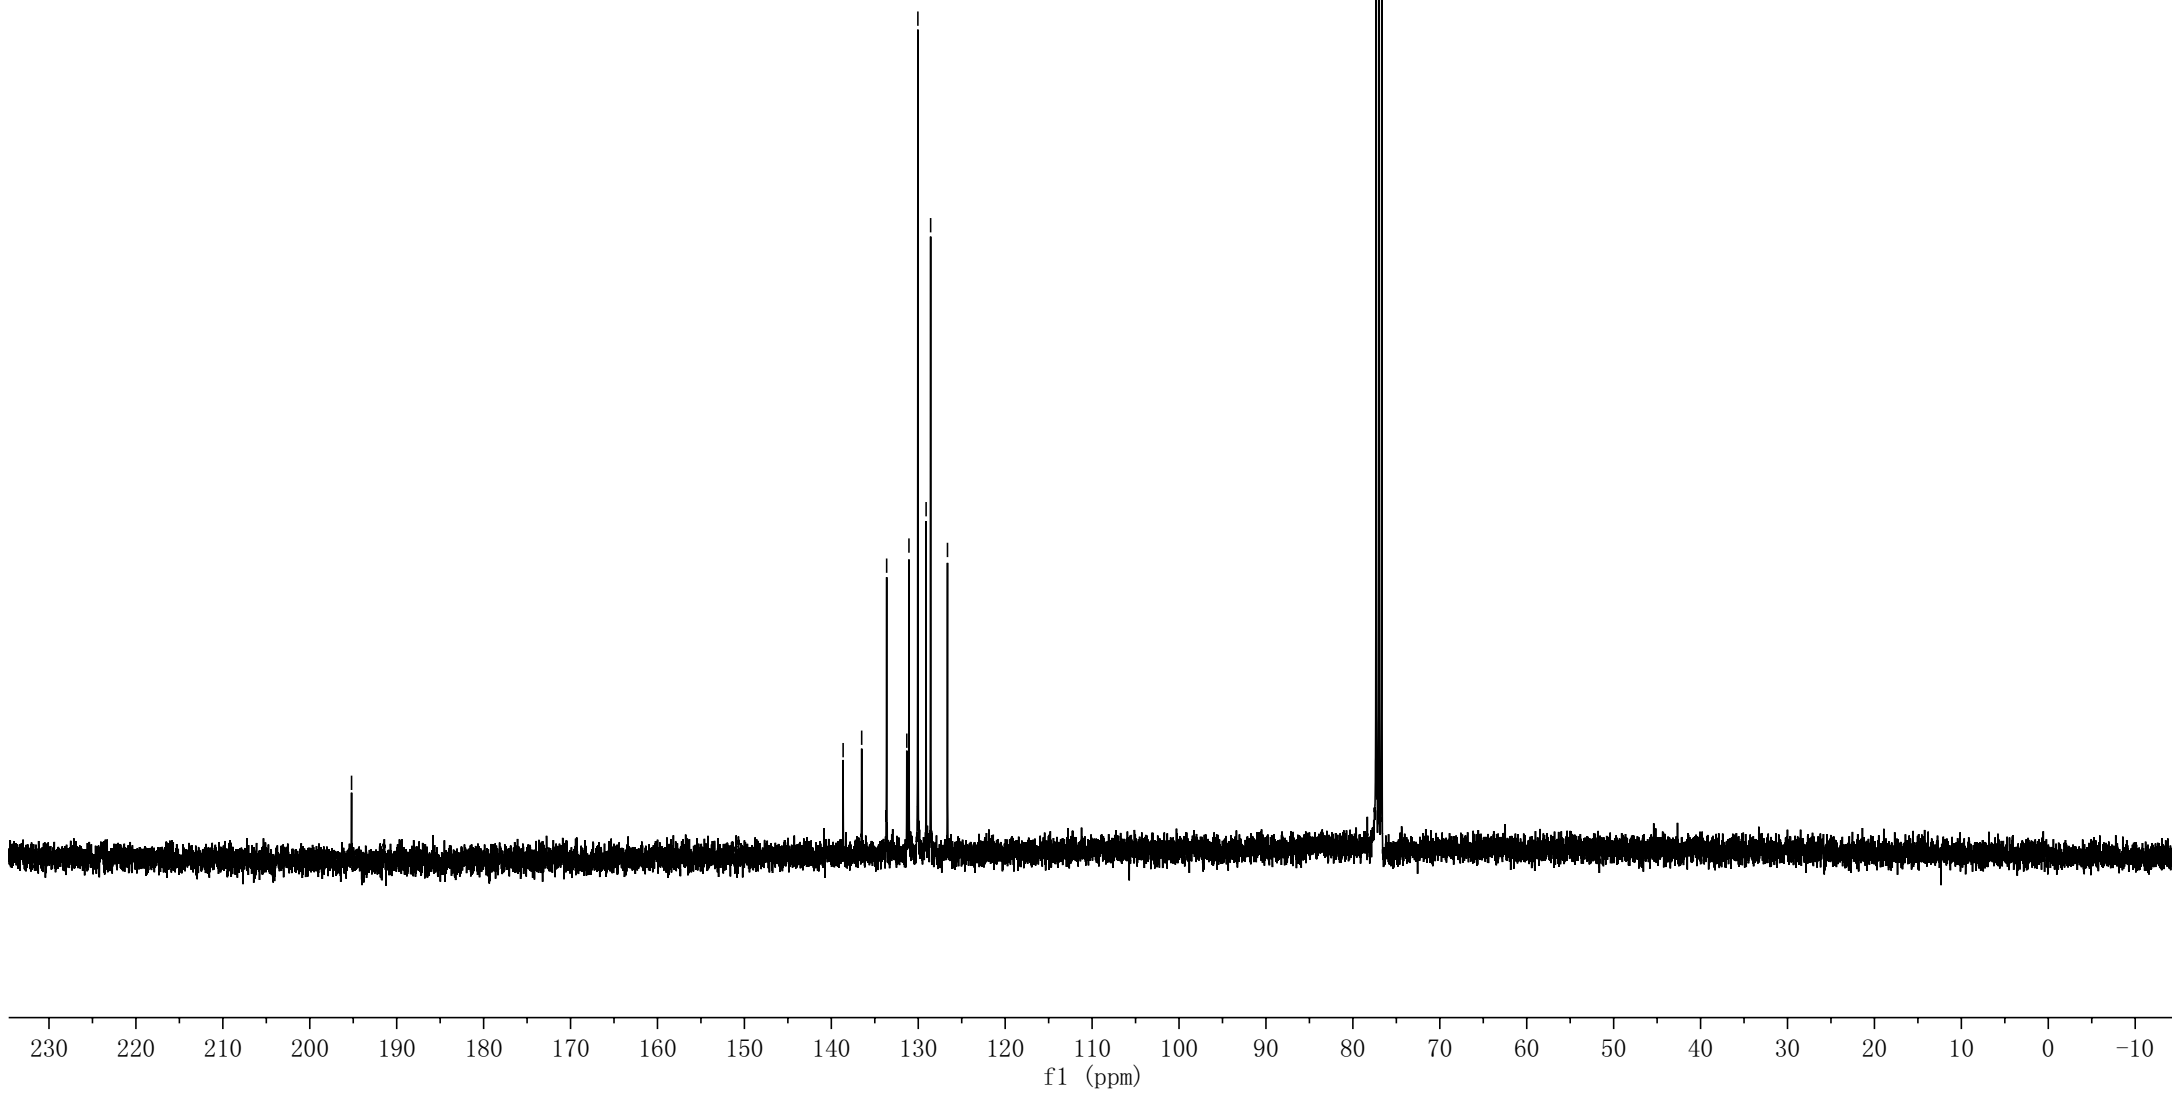

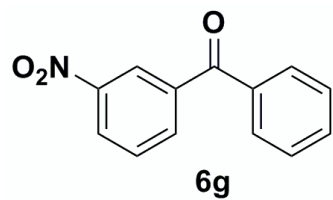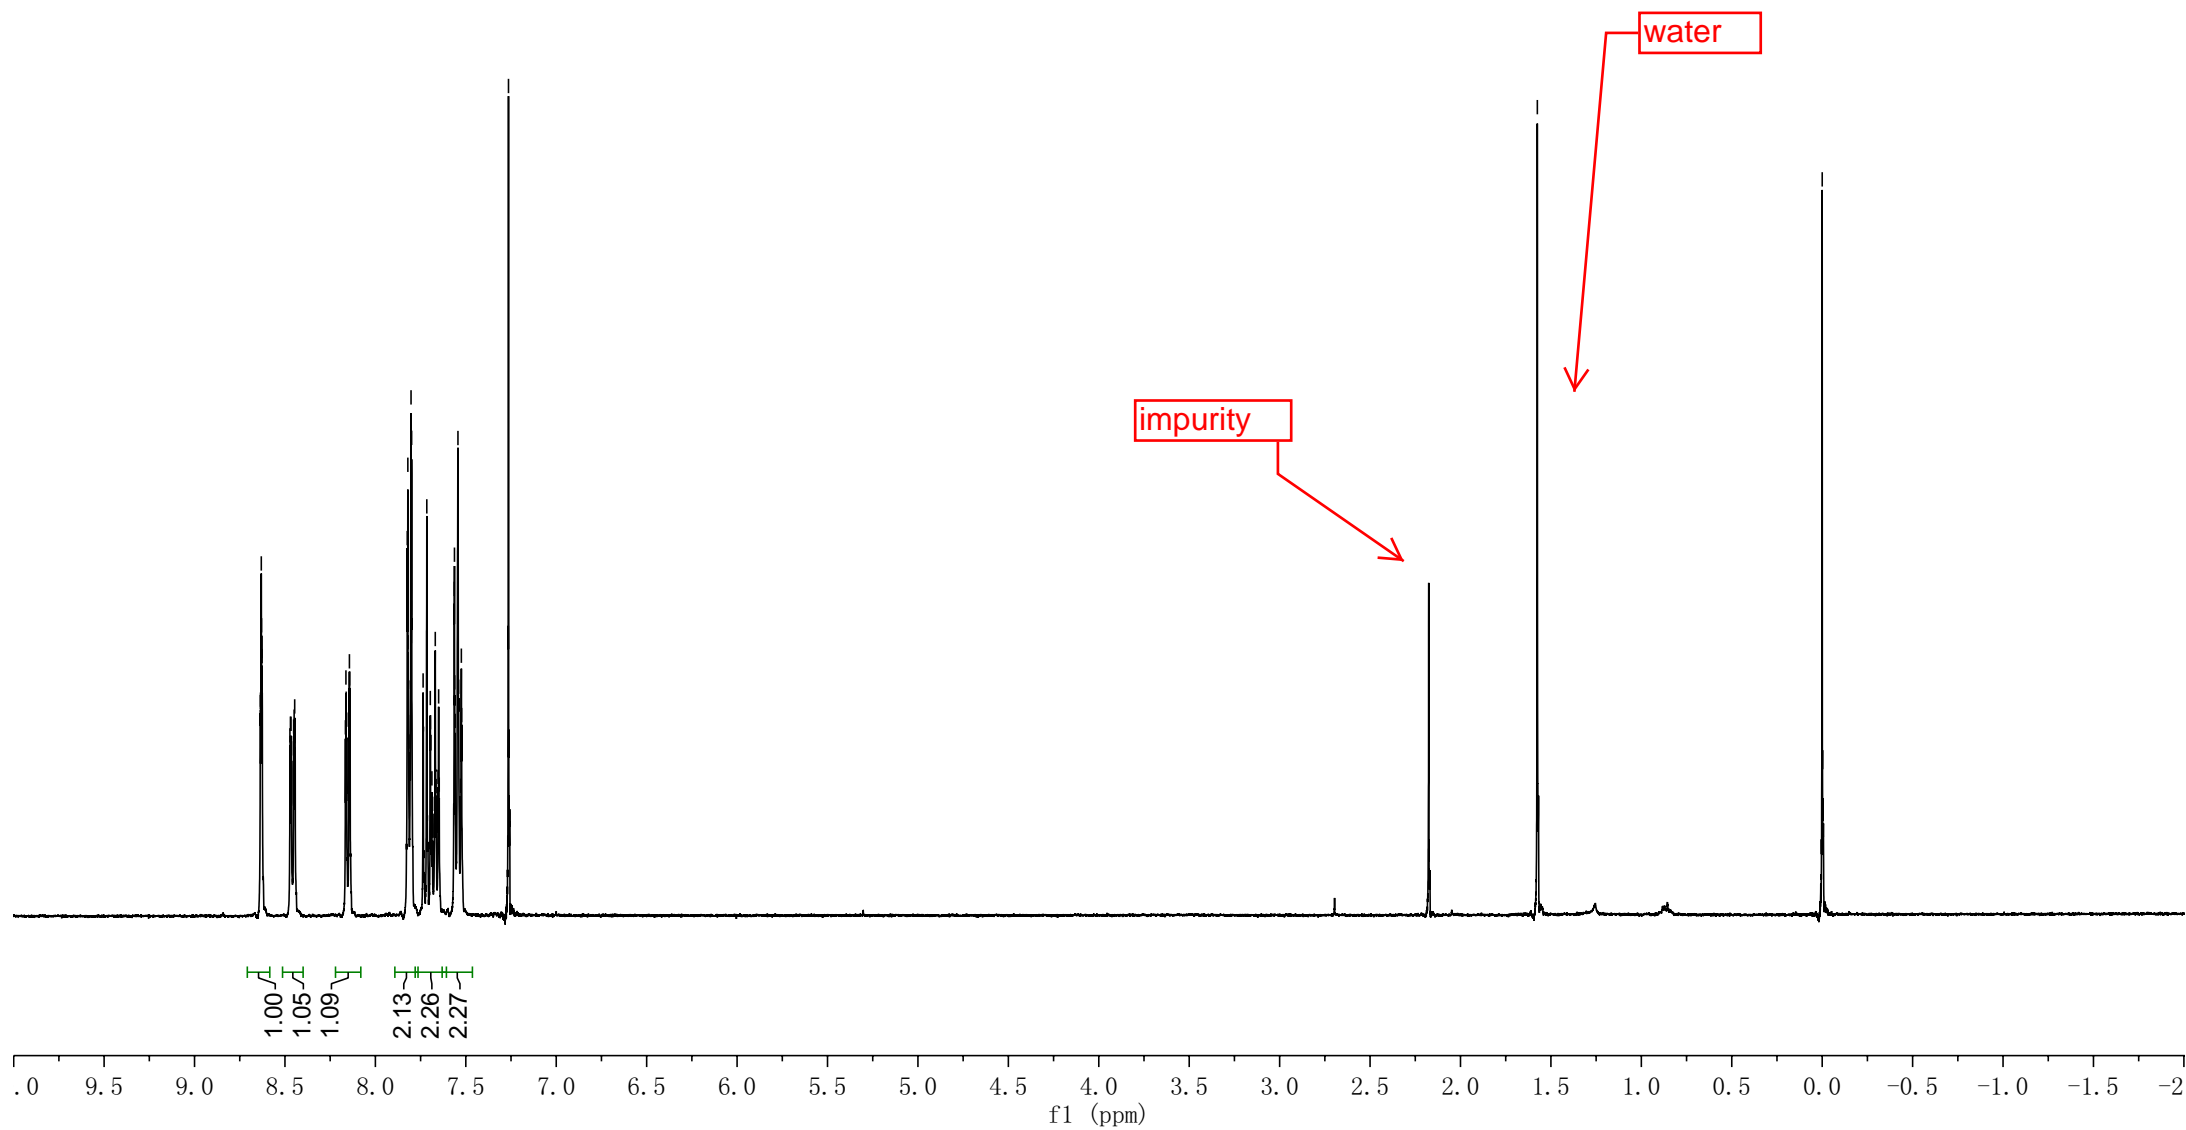

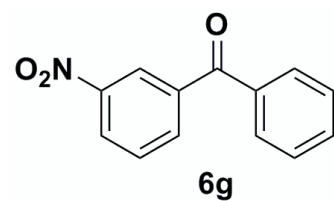

—194.133

148.071  
 139.046  
 136.238  
 135.401  
 133.336  
 129.985  
 129.607  
 128.709  
 126.691  
 124.697

77.305  
 76.988  
 76.670

S68

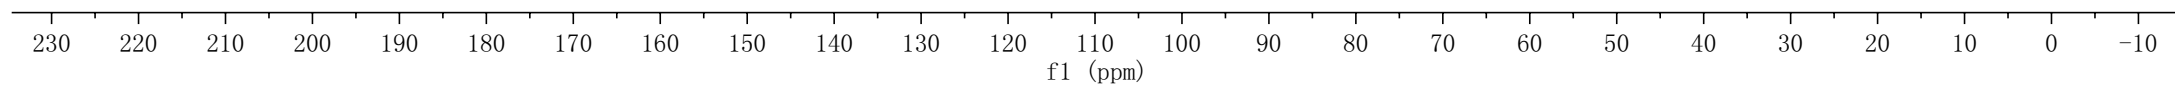

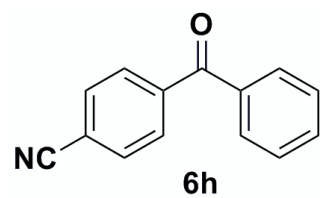

7.895  
7.890  
7.878  
7.873  
7.811  
7.806  
7.801  
7.800  
7.795  
7.789  
7.782  
7.778  
7.650  
7.632  
7.542  
7.538  
7.522  
7.503  
7.267

— 1.253

— 0.000  
s69

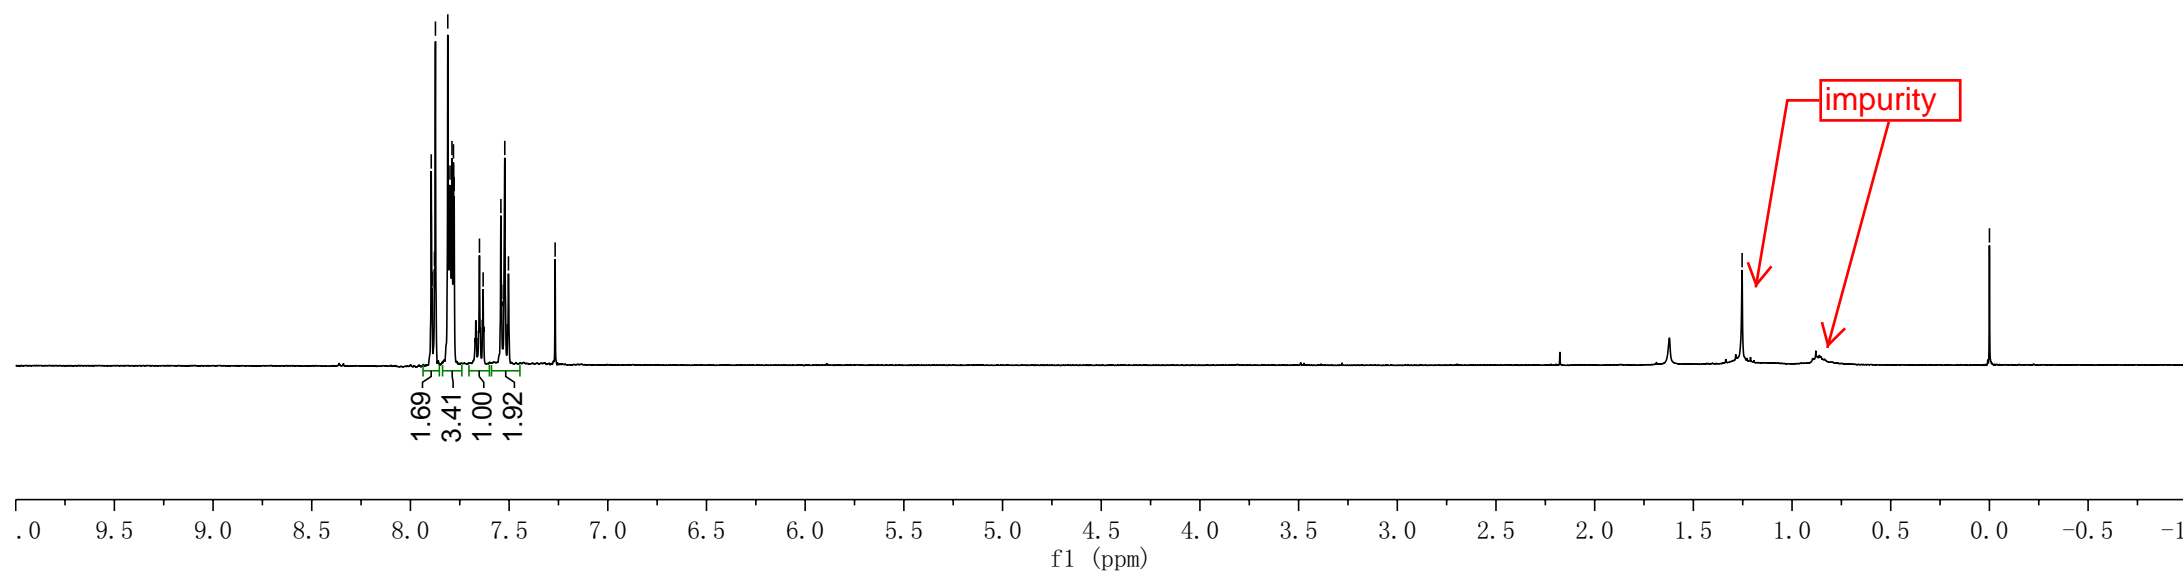

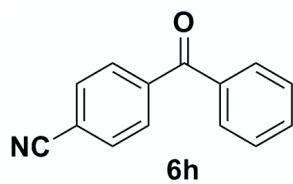

194.99

141.22  
136.31  
133.30  
132.14  
130.20  
130.04  
128.61

117.97  
115.66

77.31  
76.99  
76.67

S70

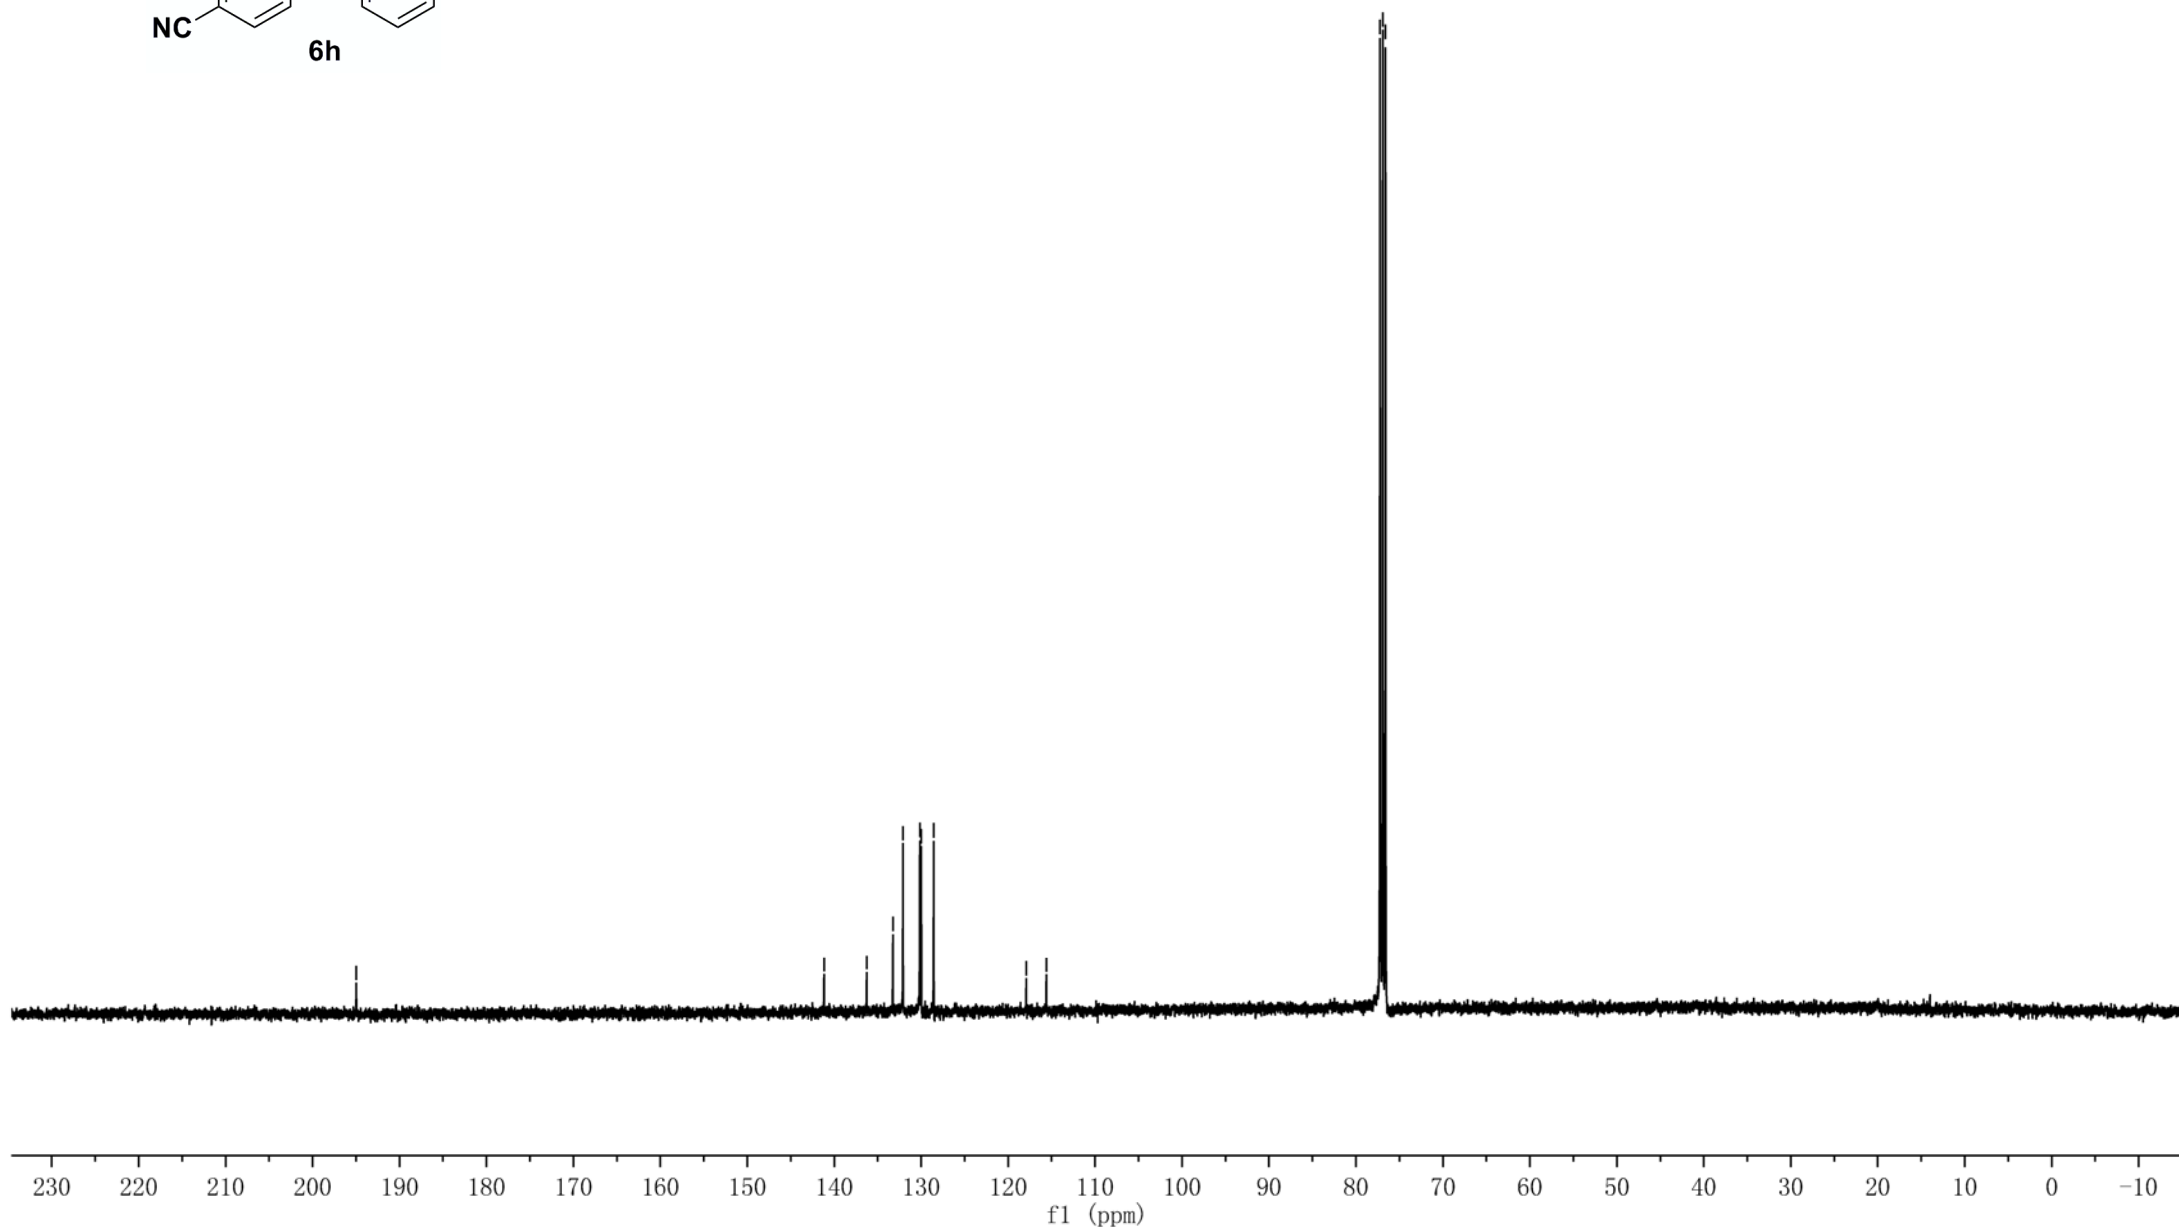

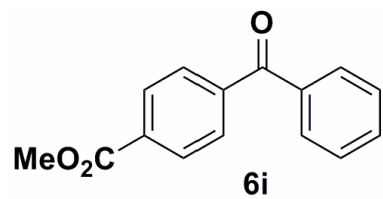

8.16  
 8.15  
 7.85  
 7.84  
 7.81  
 7.80  
 7.62  
 7.50  
 7.26

3.97  
 3.97

—1.55

—0.00

S71

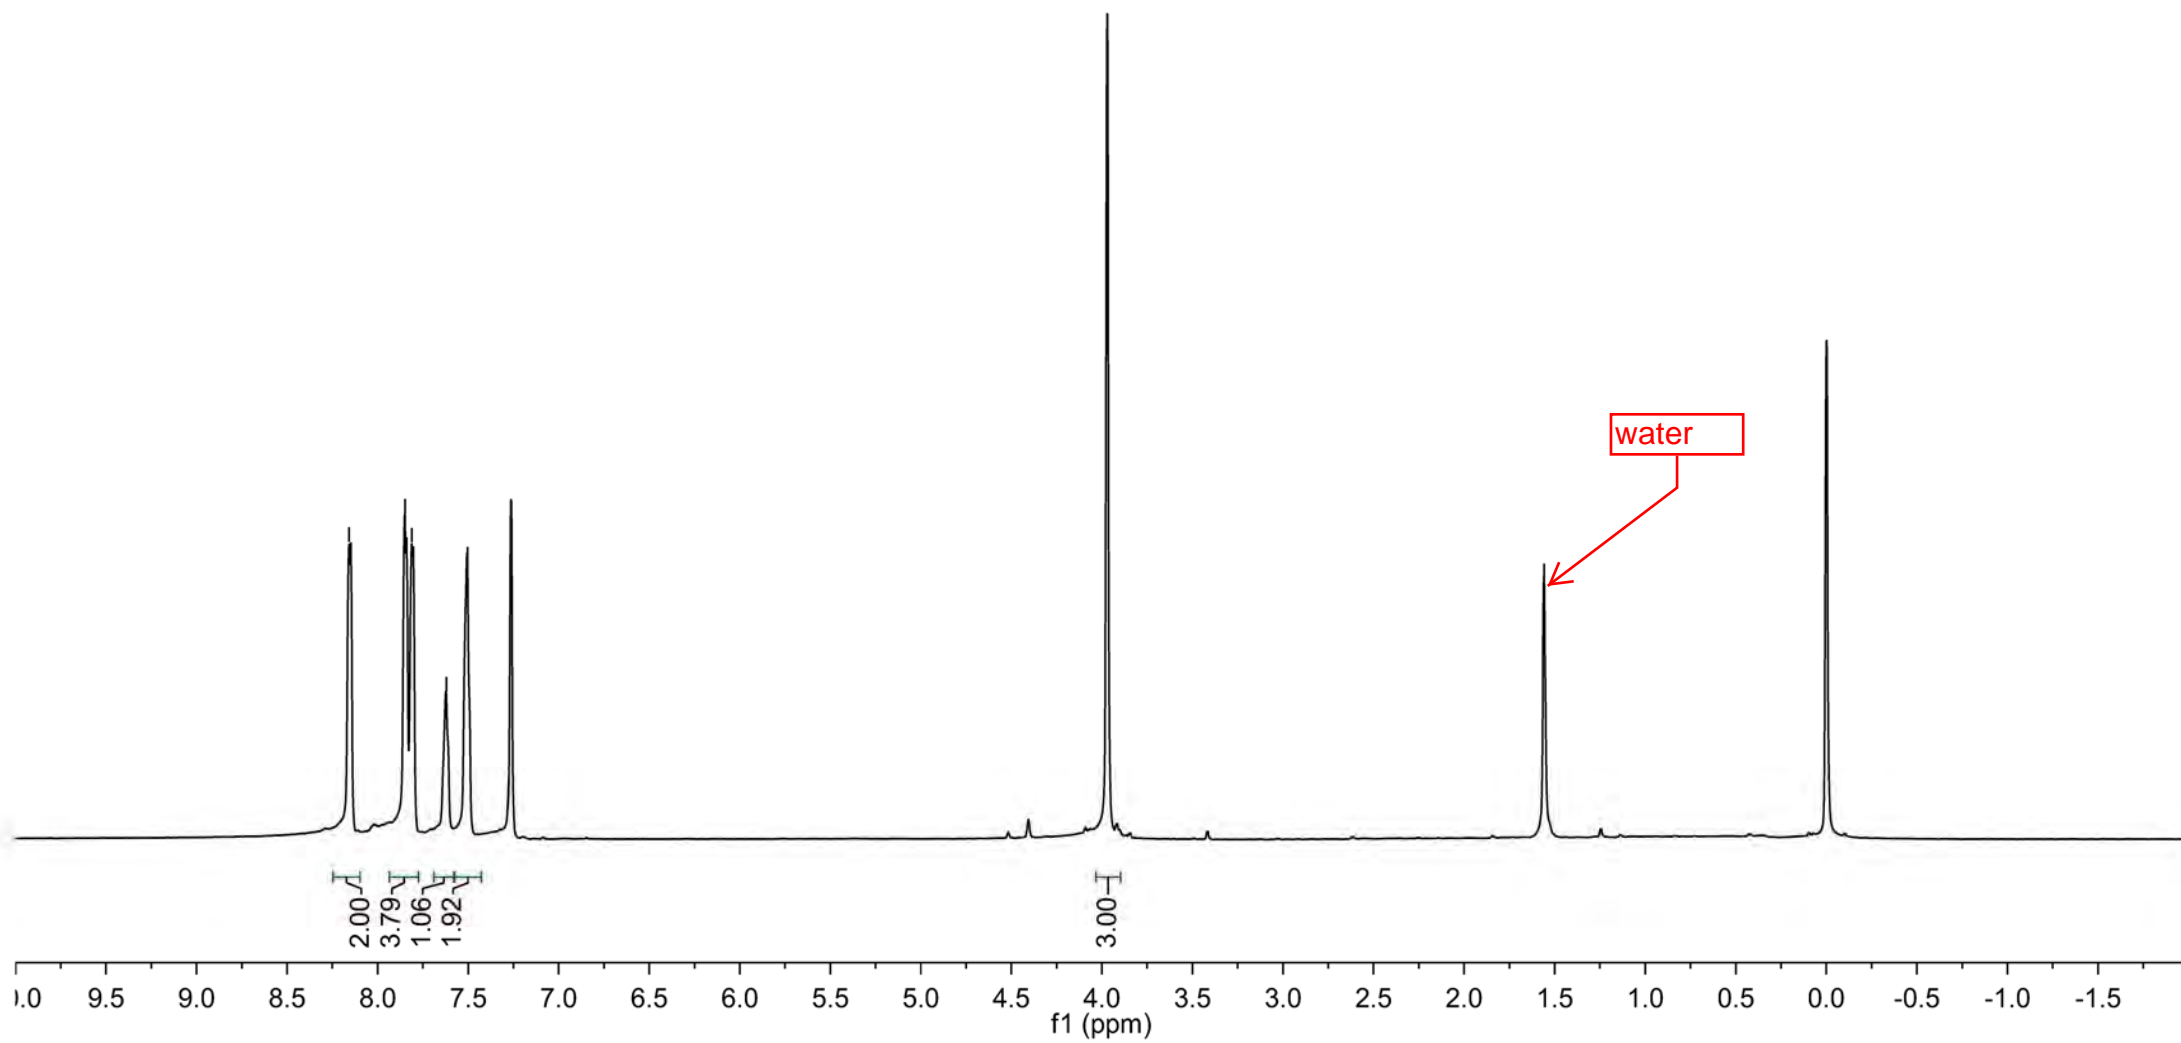

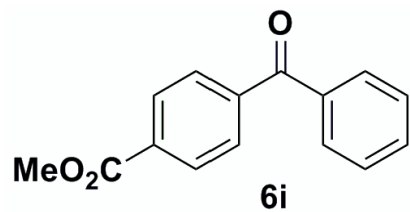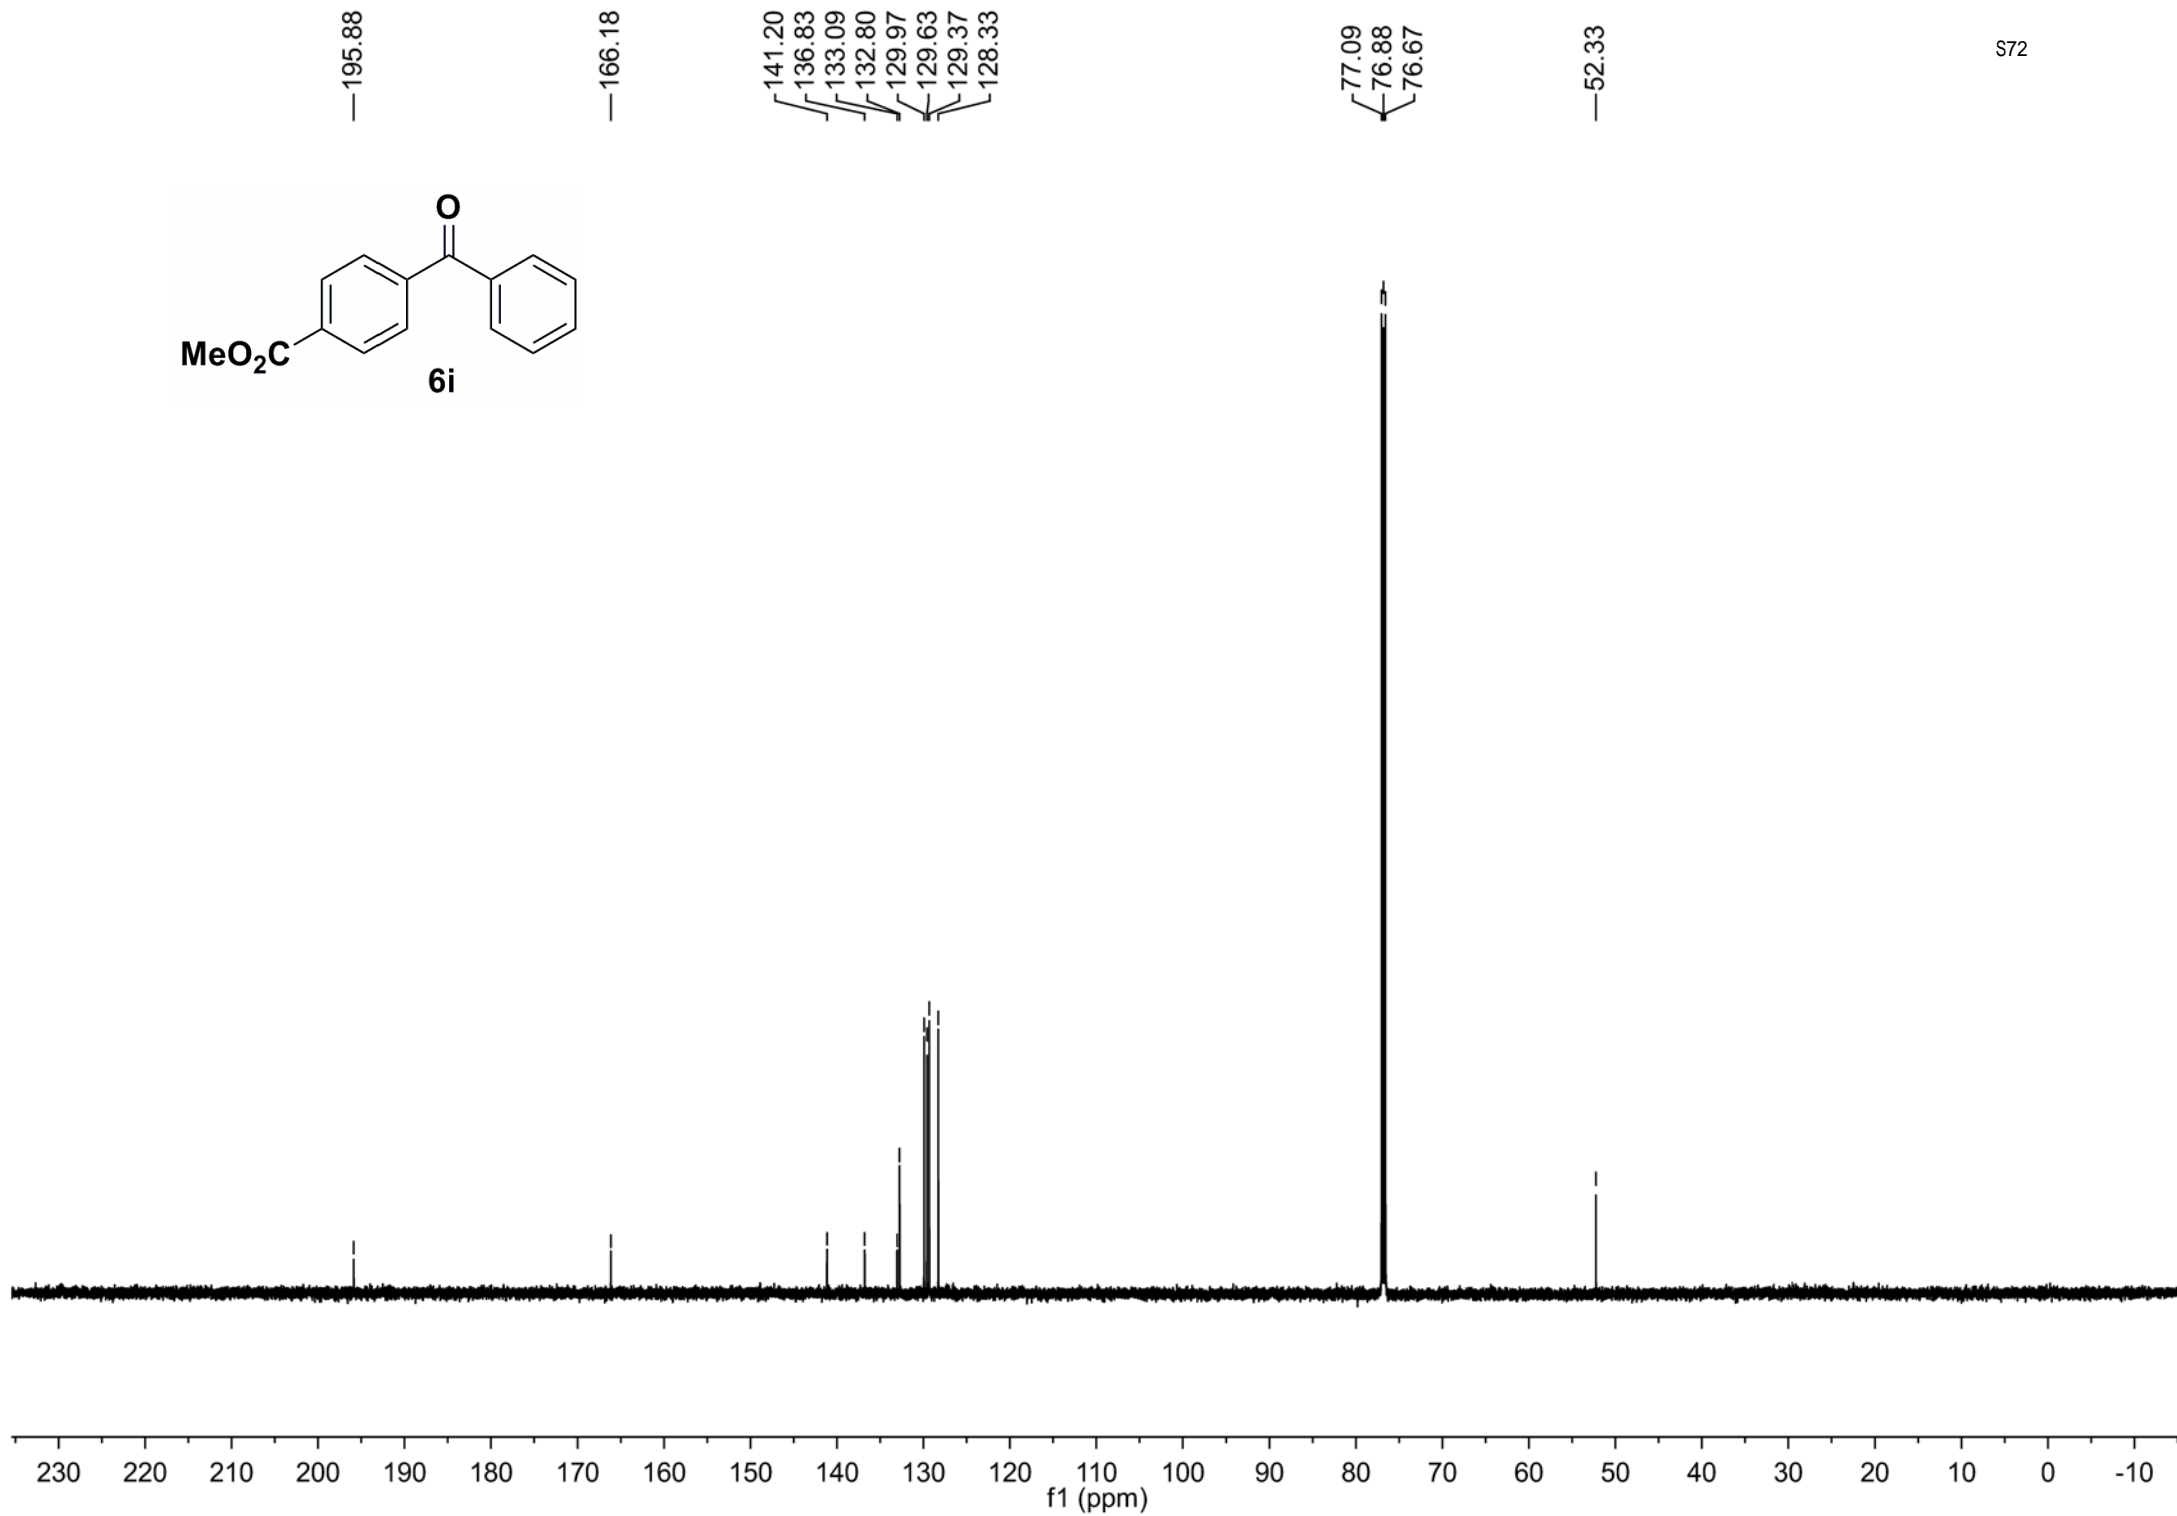

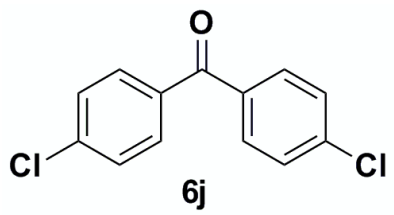

7.740  
7.719  
7.485  
7.464  
7.262

1.574

0.000  
573

water

4.14  
4.00

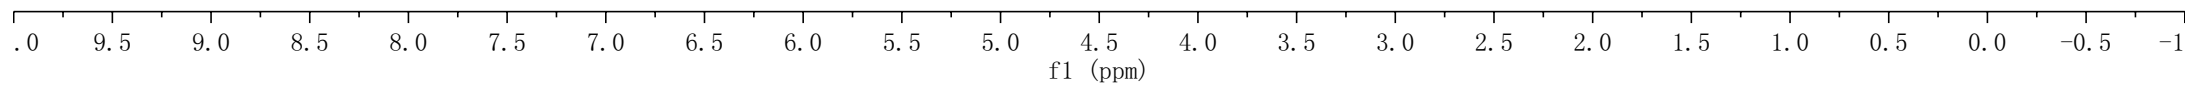

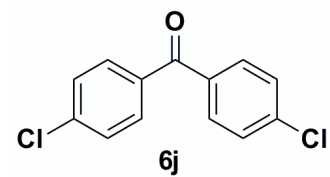

—194.06

—139.07

—135.46

—131.23

—128.69

77.31

76.99

76.67

S74

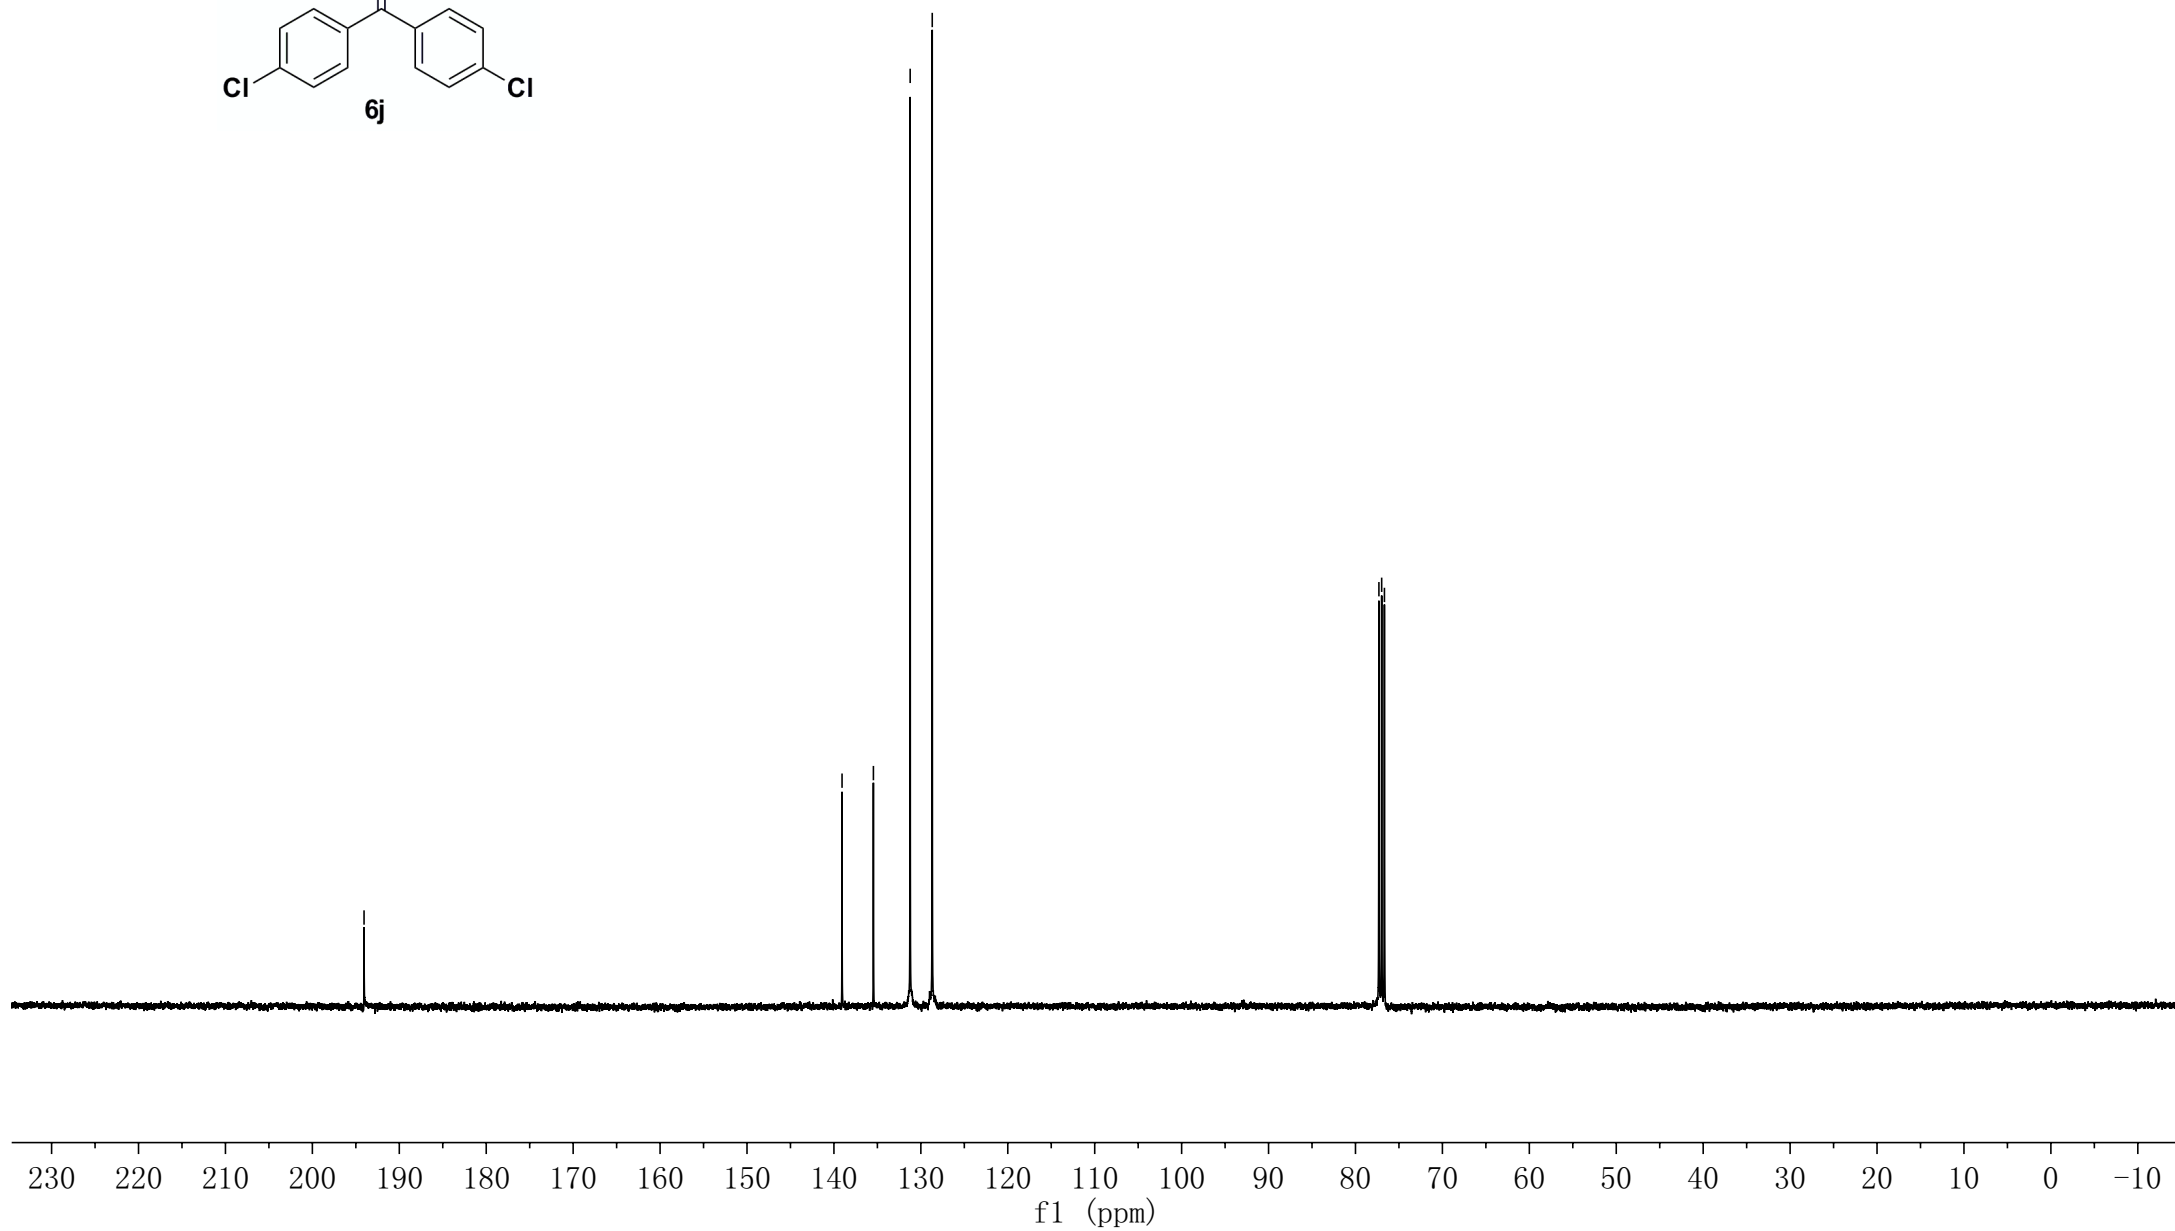

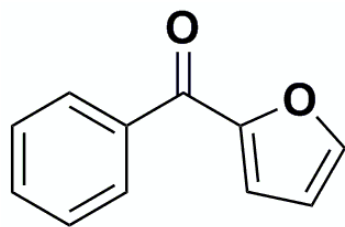

**6k**

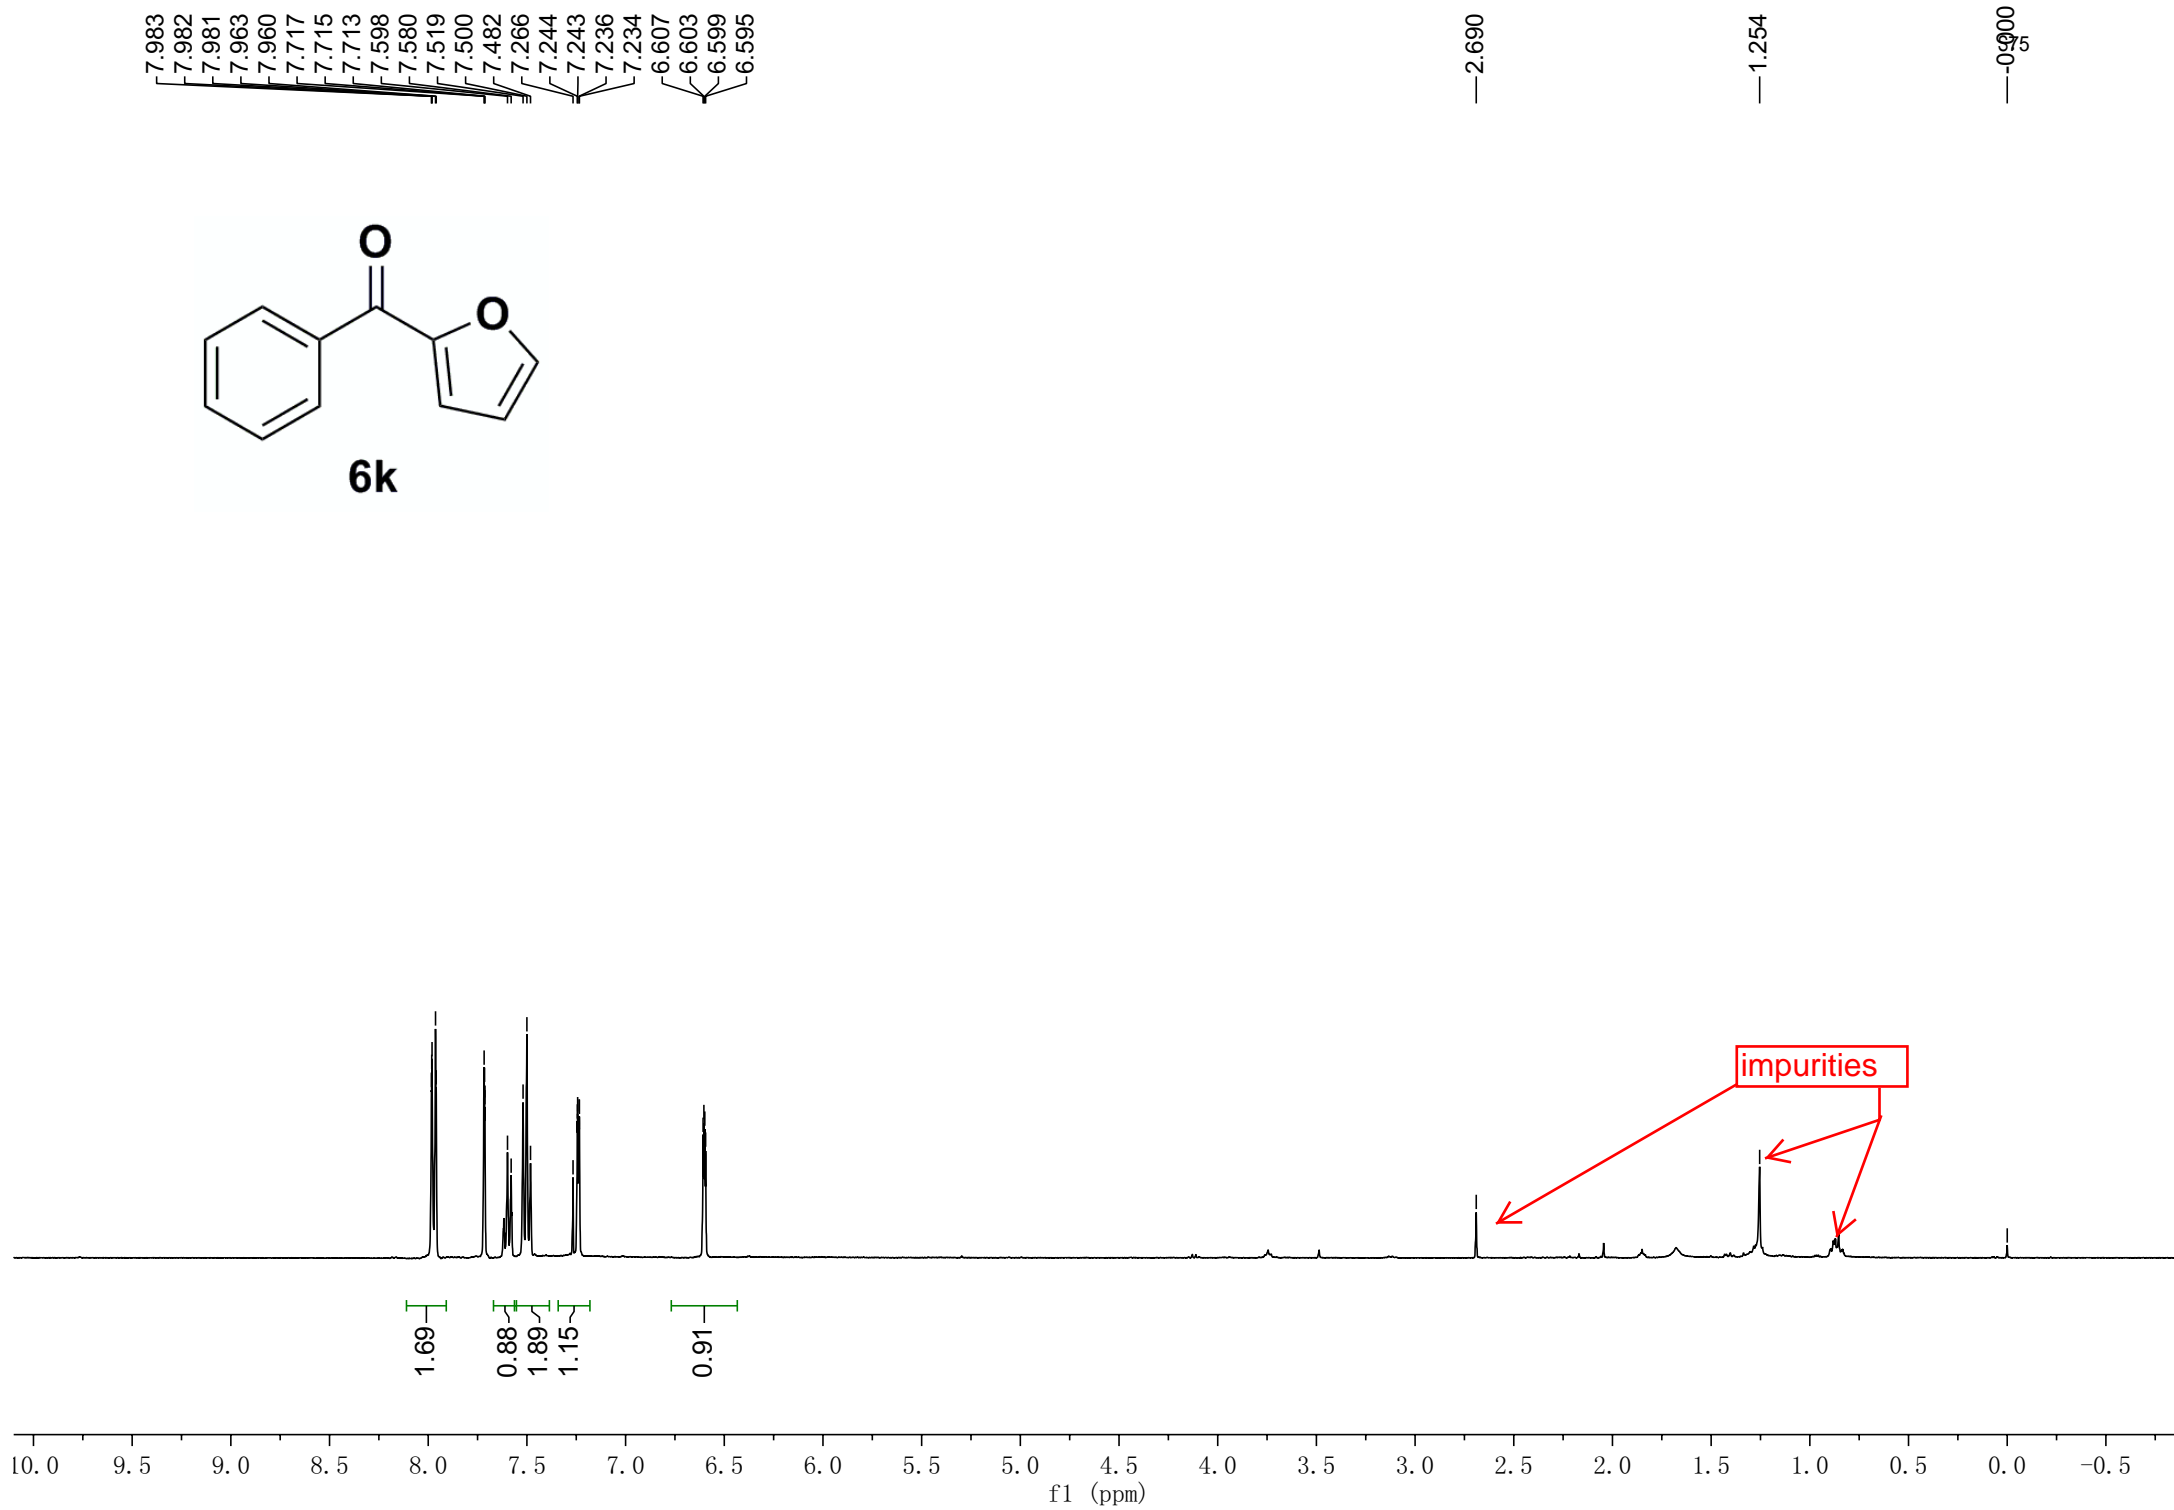

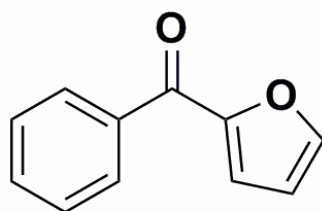**6k**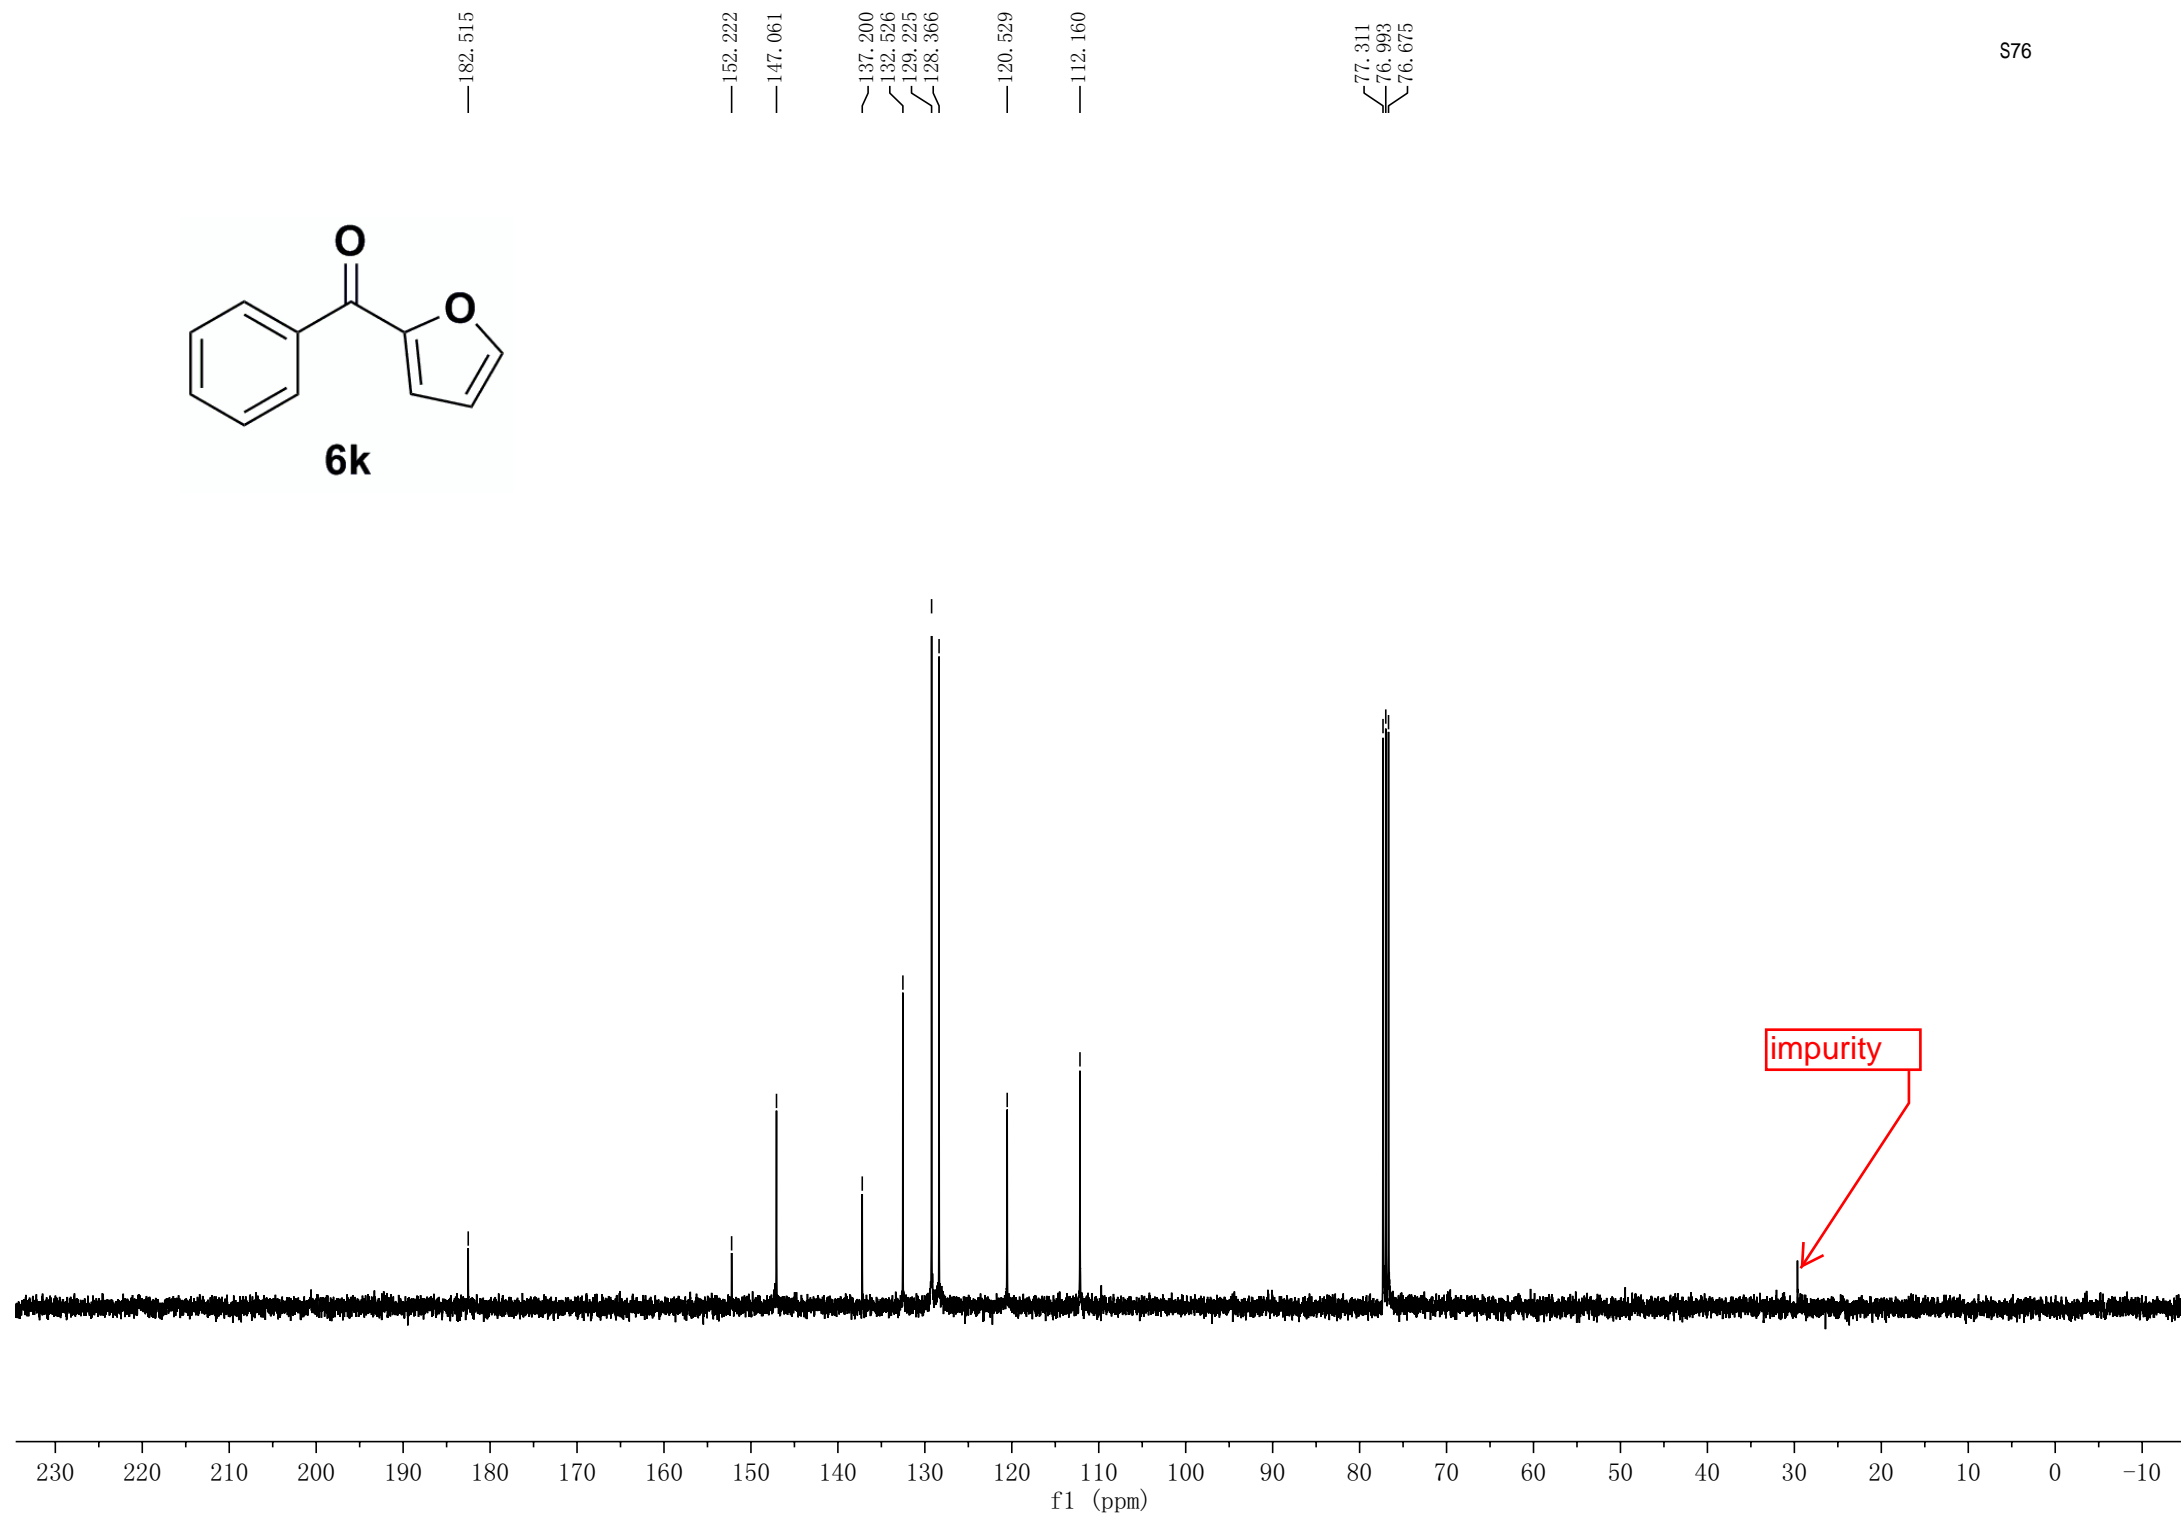

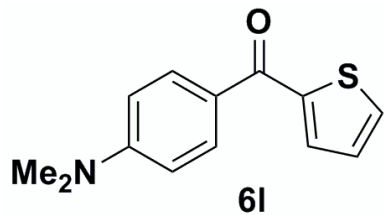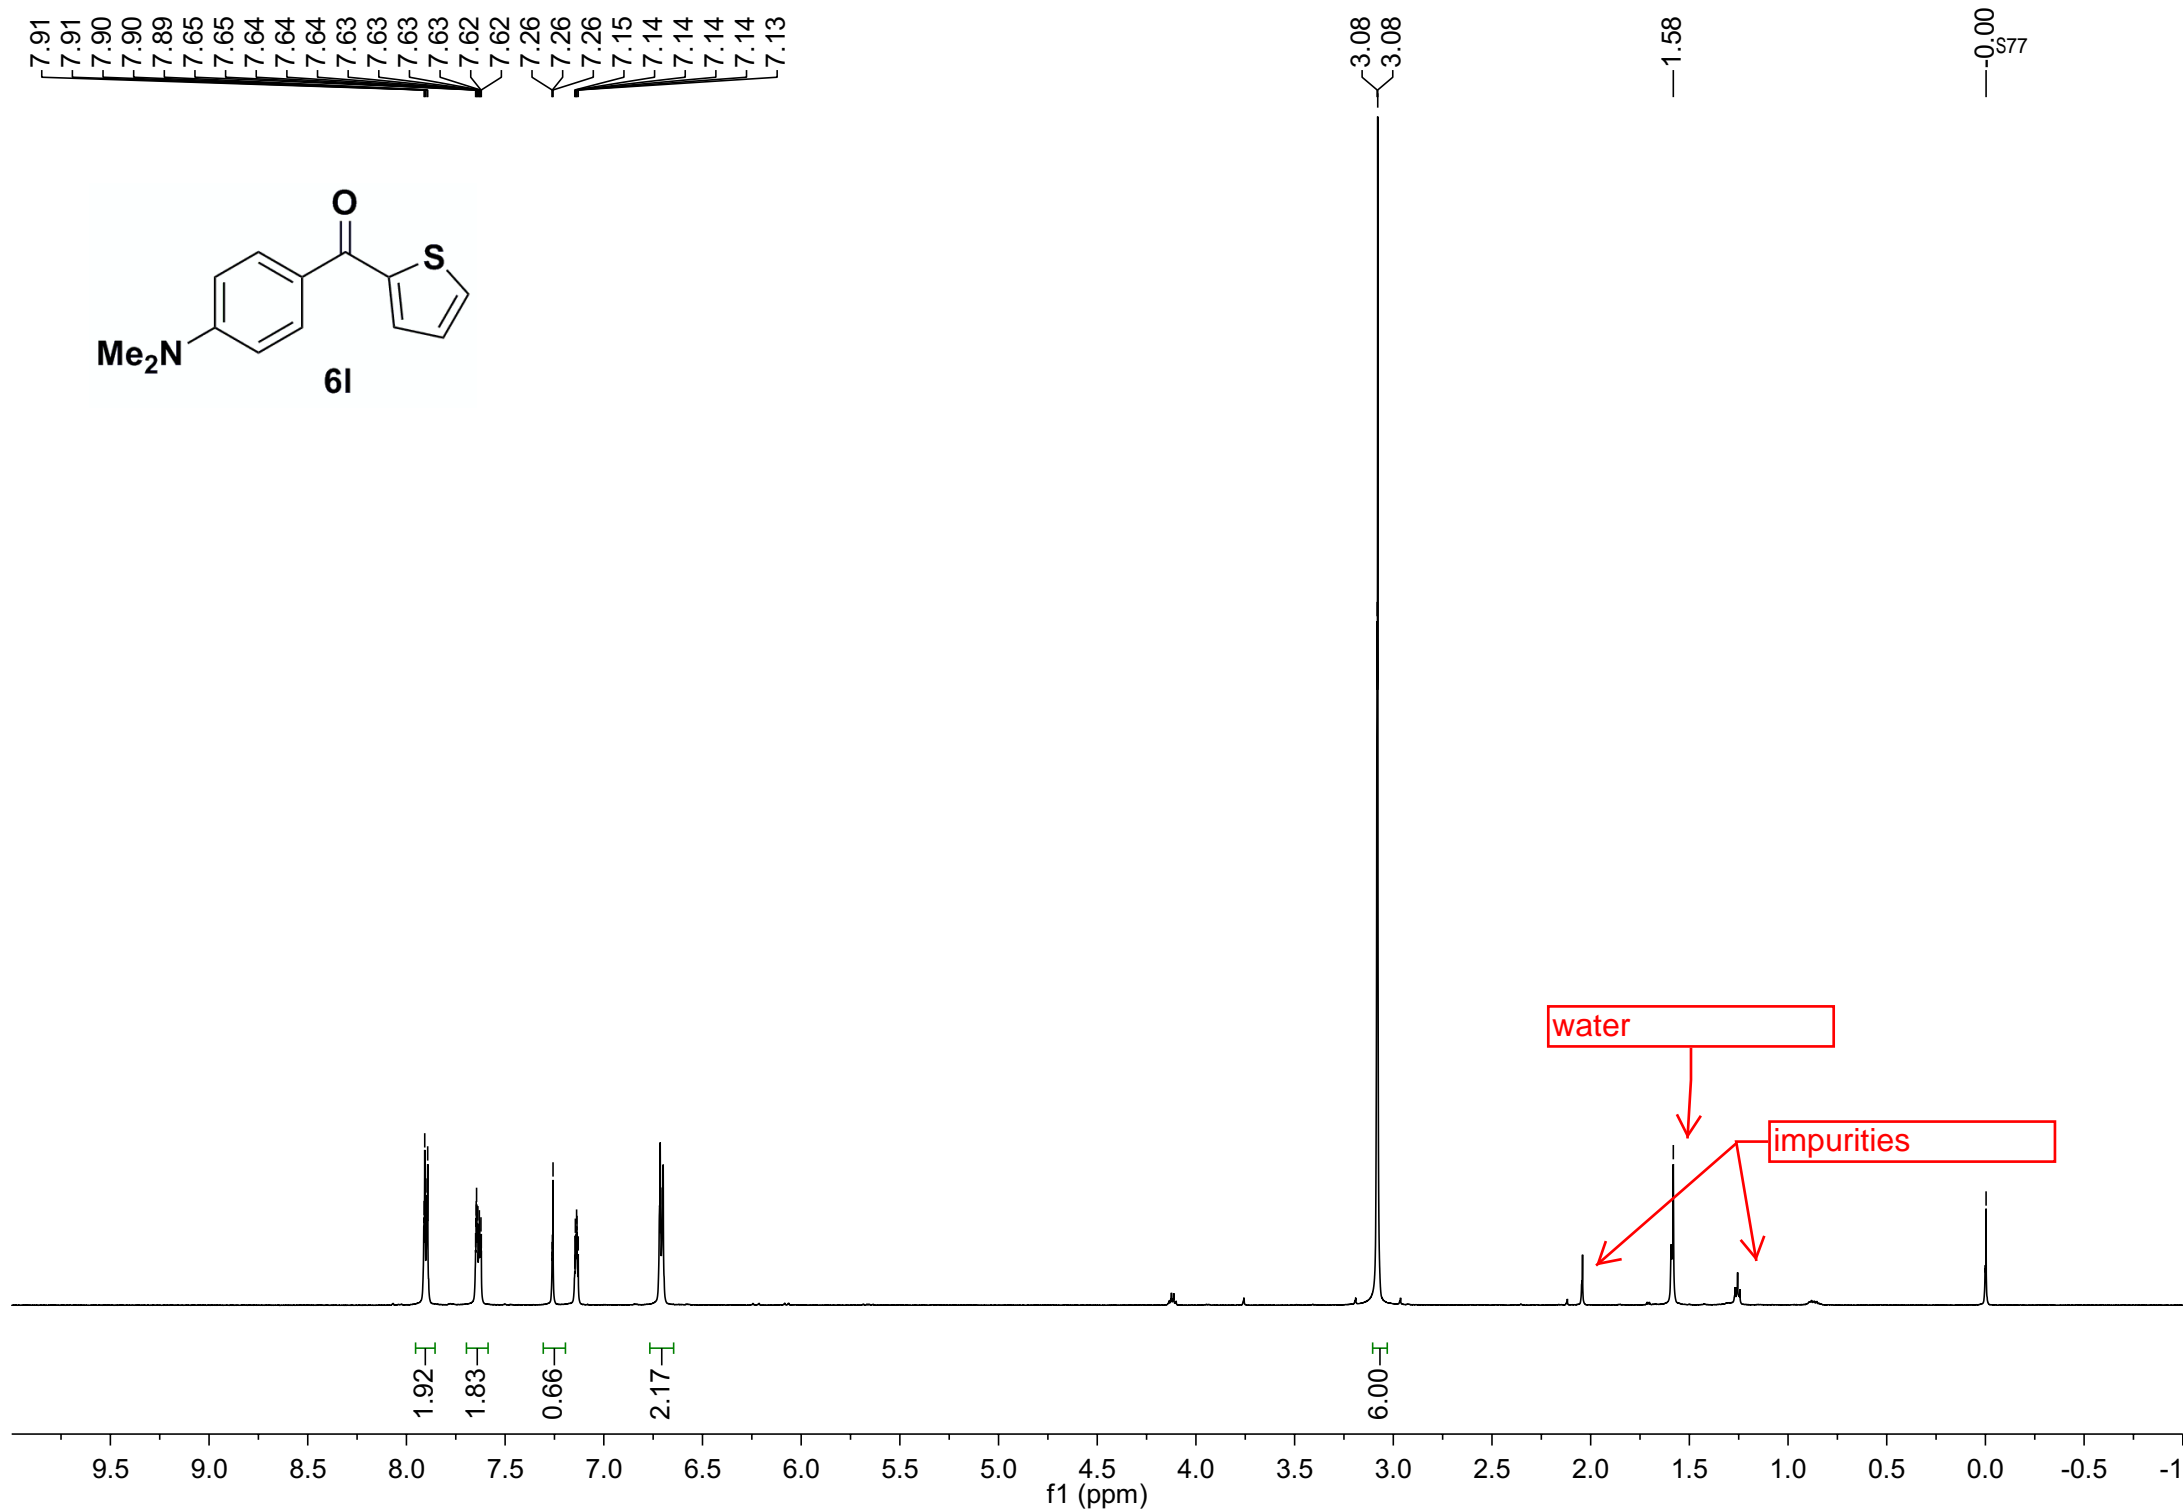

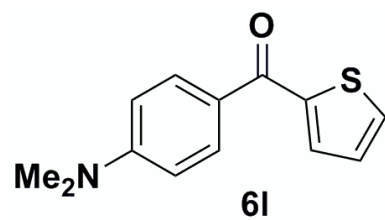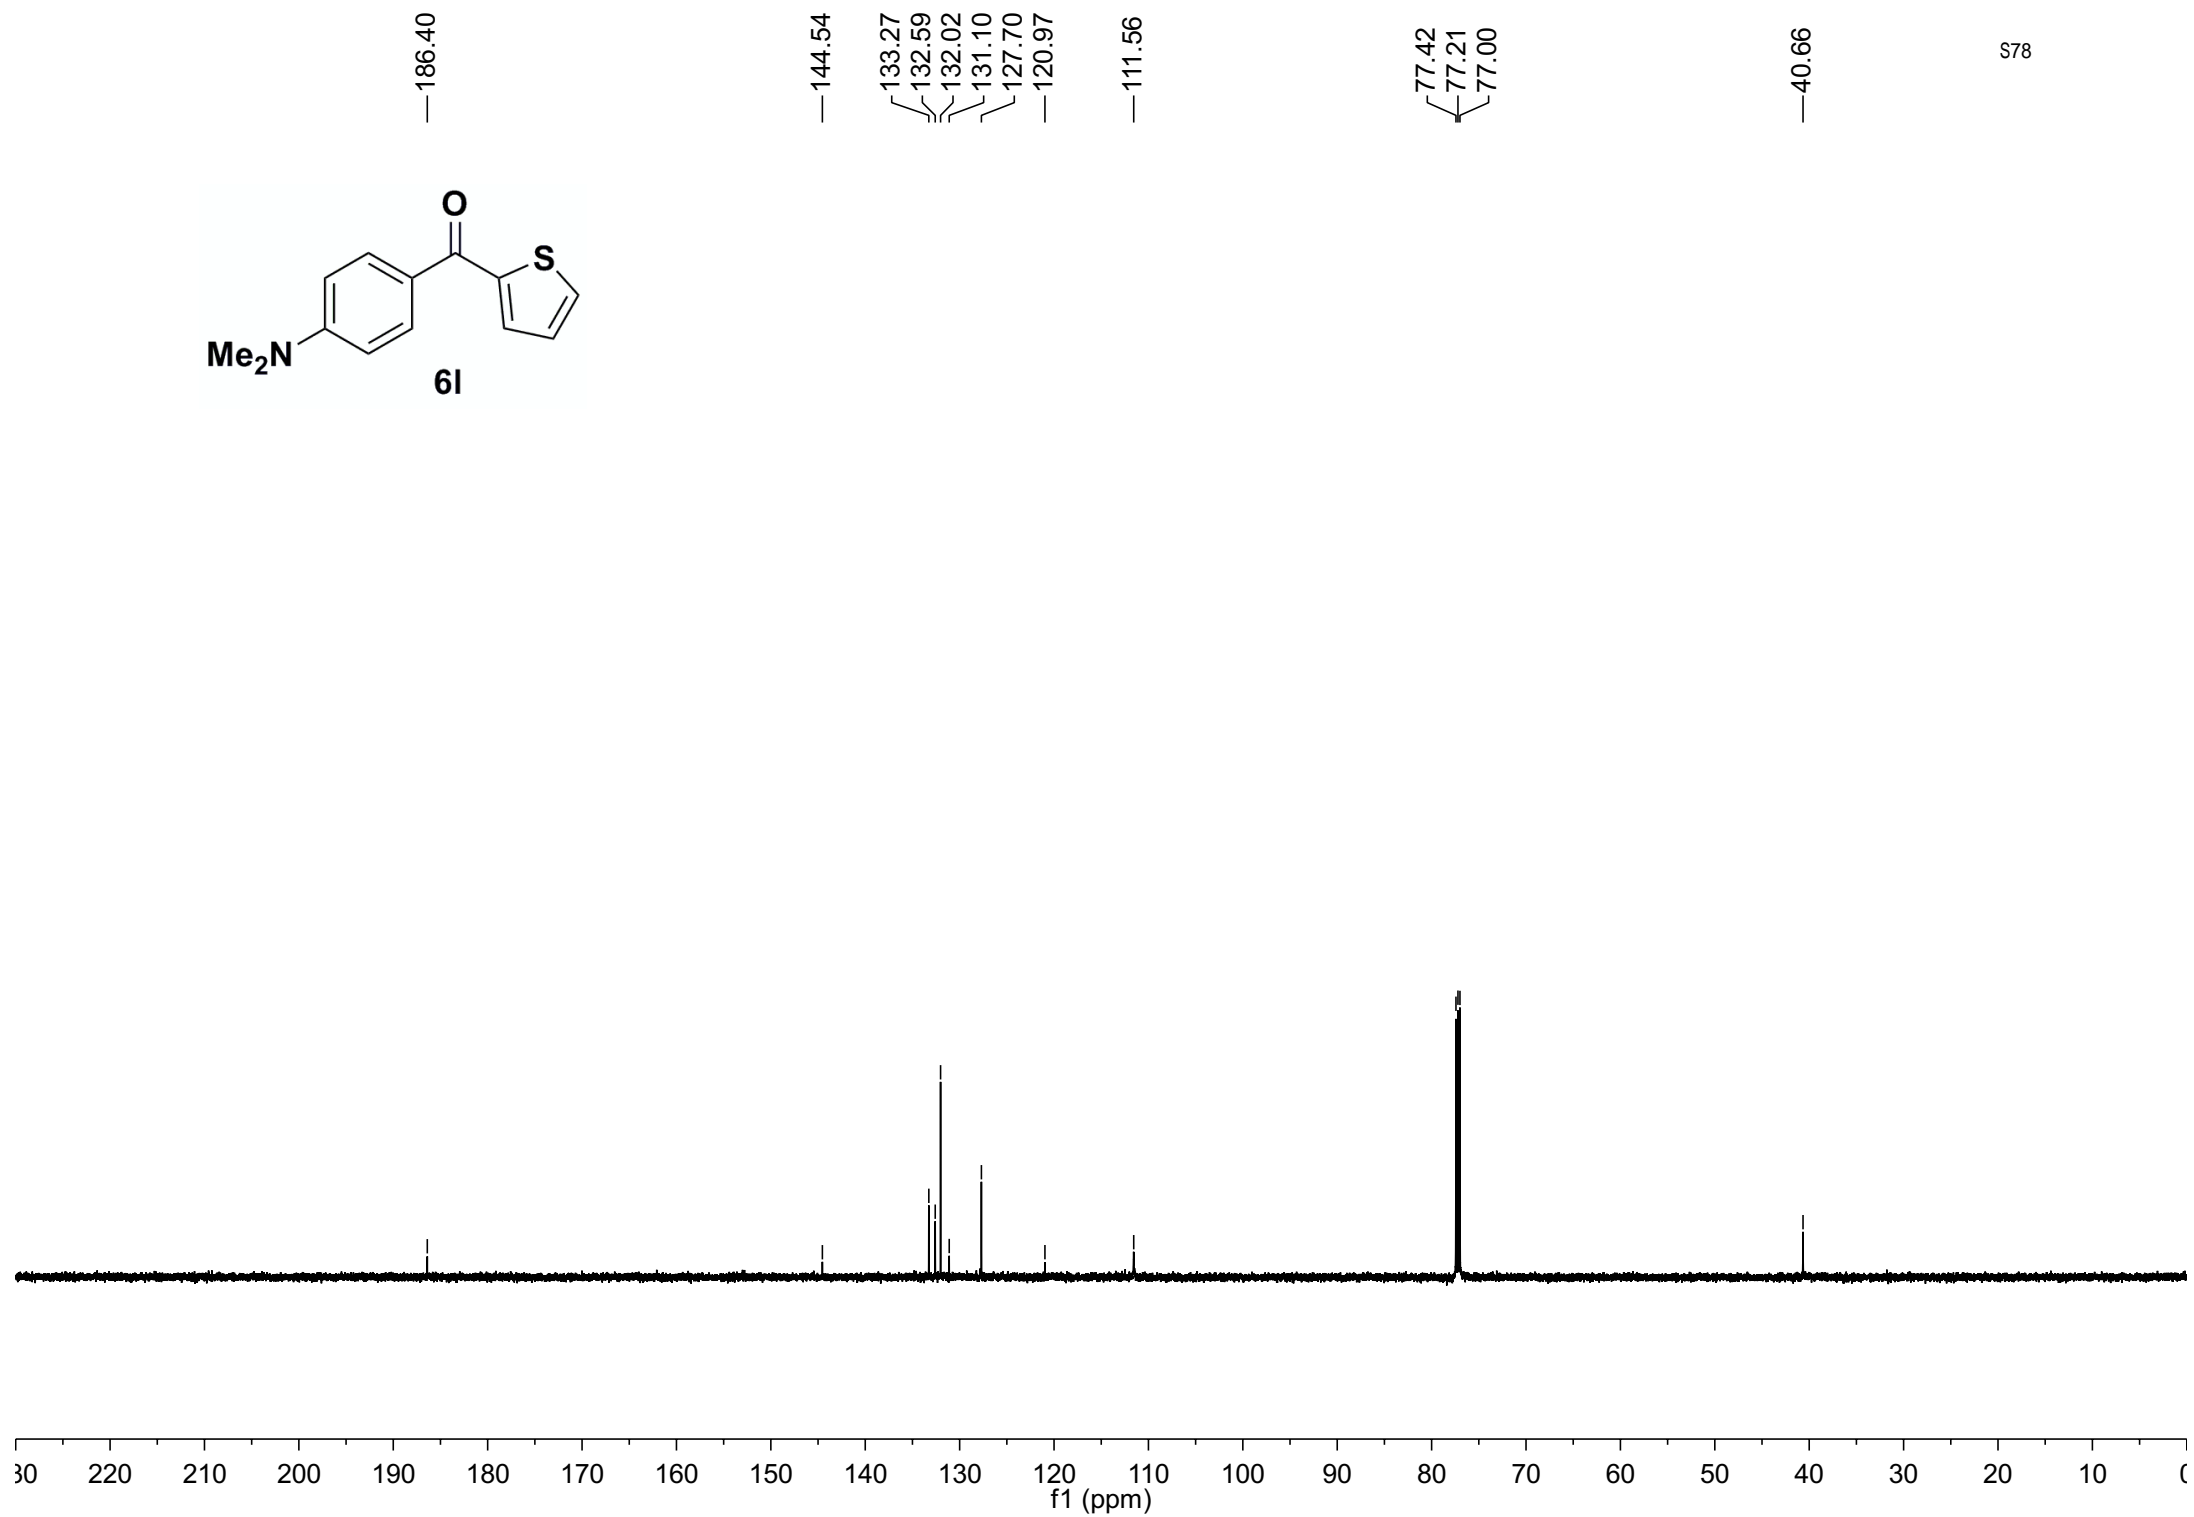

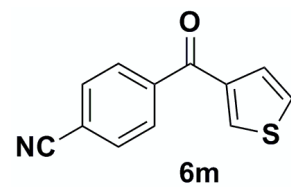

7.26

4.78  
4.78  
4.77  
4.50  
4.49  
4.49

3.49  
3.48

3.06  
3.05  
3.04  
3.03  
3.02

1.56

1.21  
1.20

-0.00

S79

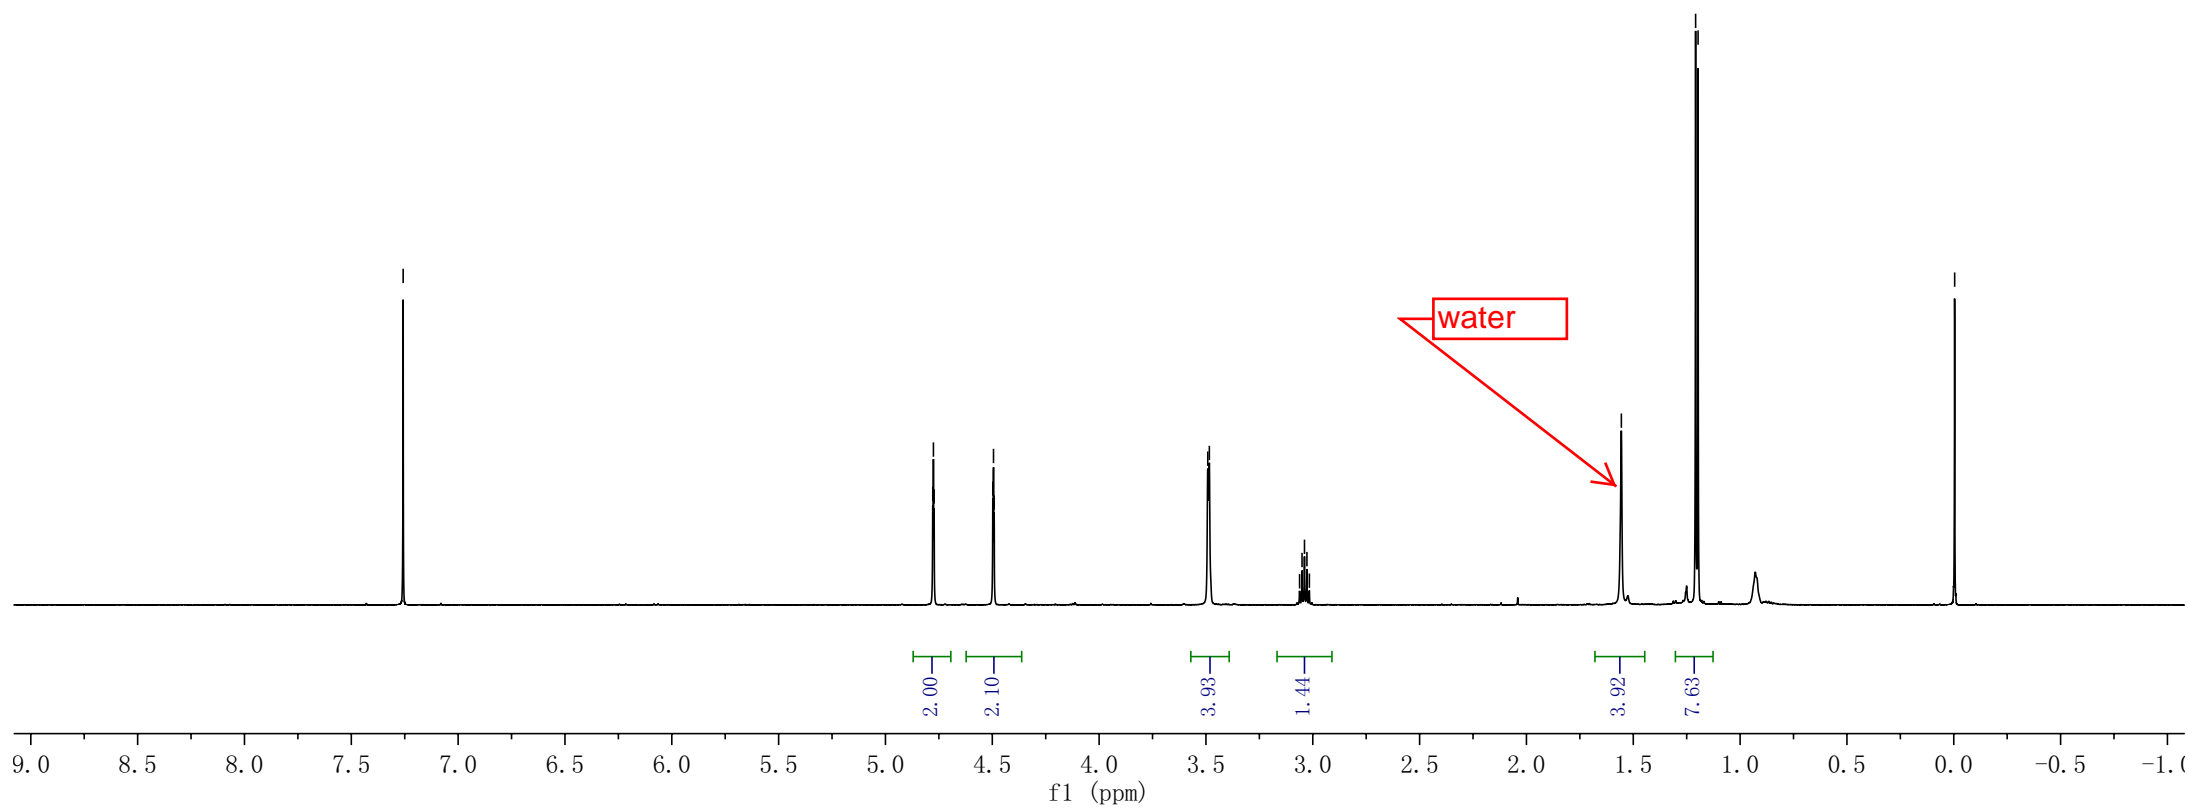

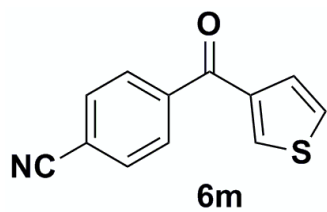

—189.956

141.213  
138.543  
133.893  
132.256  
129.310  
128.543  
128.320  
126.159

77.306  
76.989  
76.671

S80

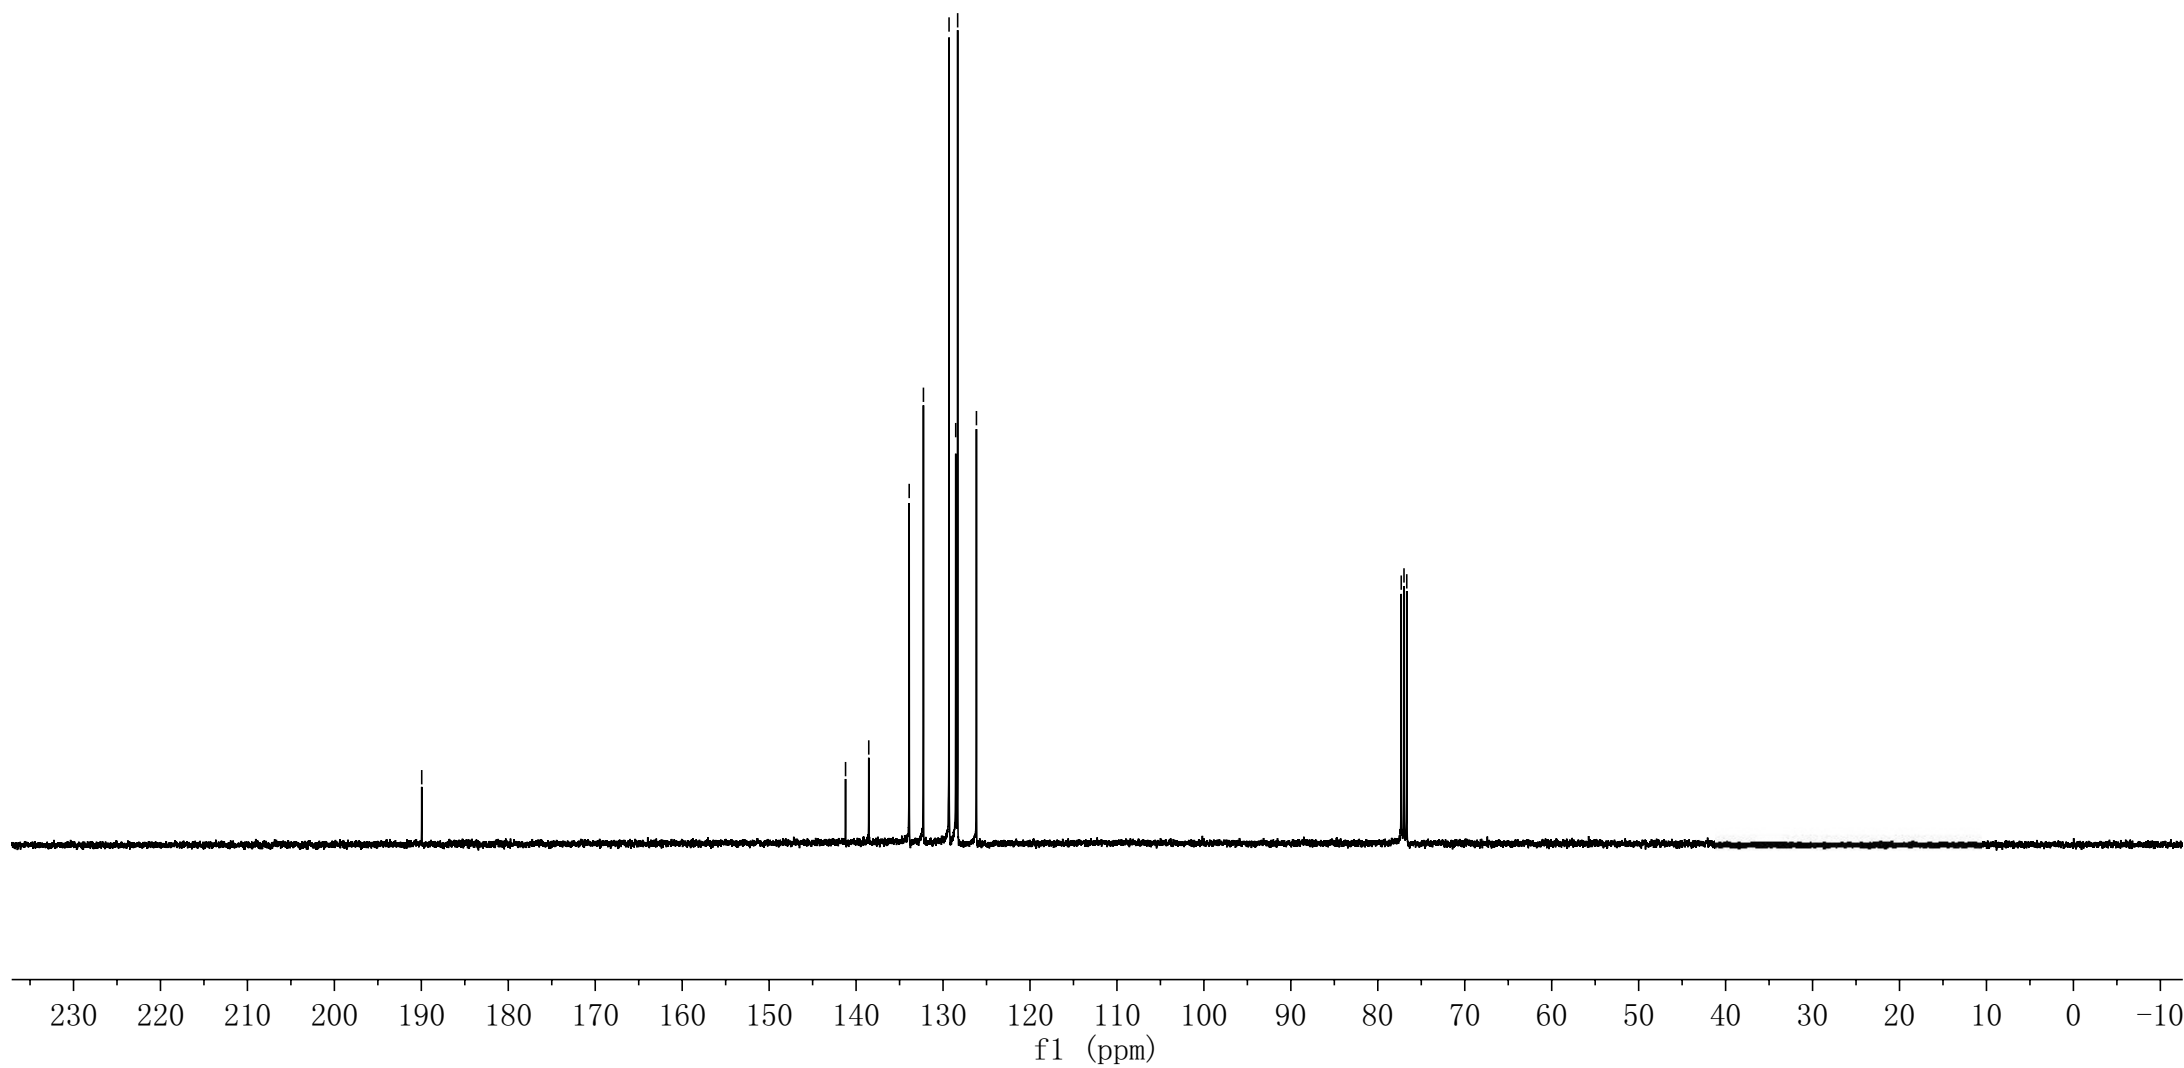

7.88  
7.87  
7.53  
7.45  
7.30  
7.24

4.89  
4.57  
4.19  
4.19

0.01  
0.02

S81

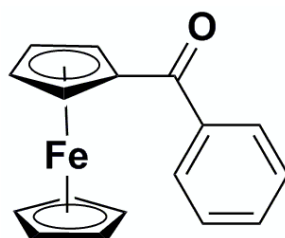

6n

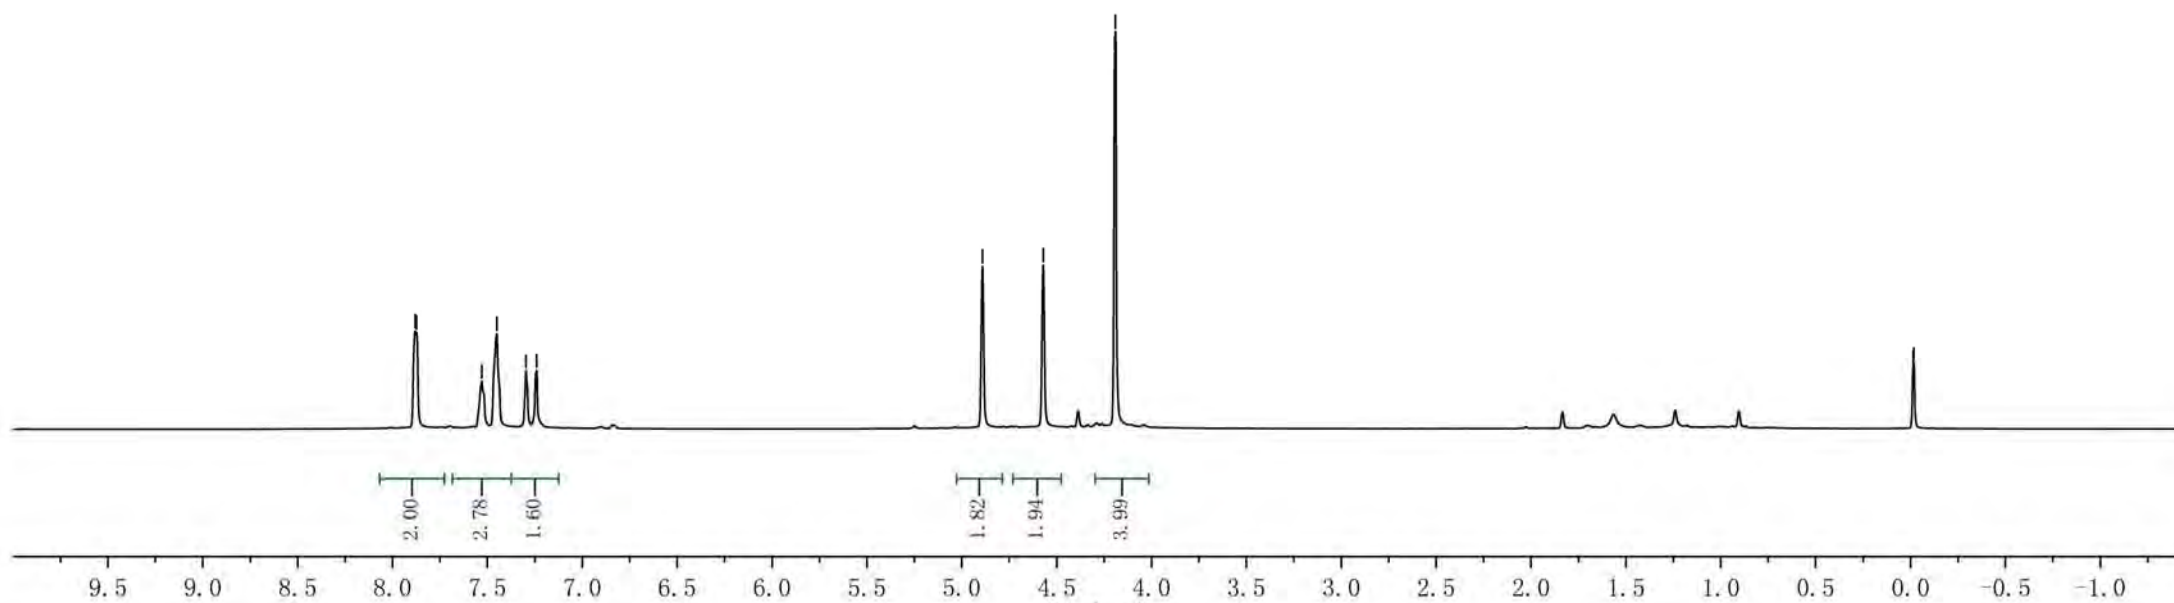

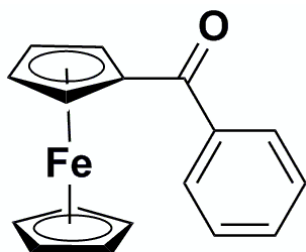

**6n**

— 199.07

— 139.81

— 131.44

— 128.19

— 128.04

78.16

77.20

76.99

76.78

72.52

71.51

70.20

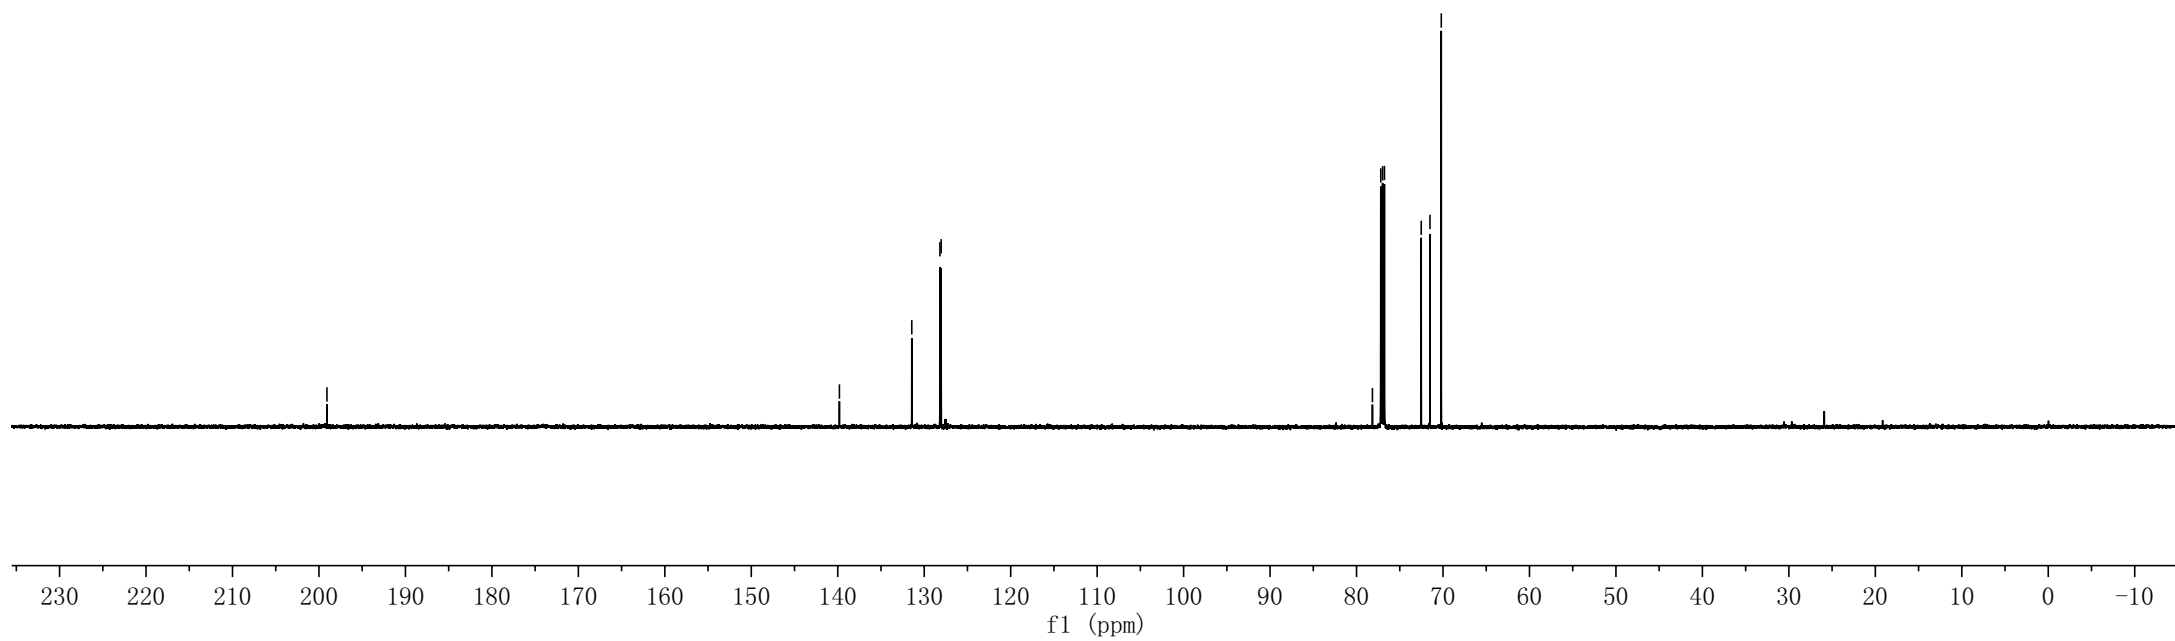

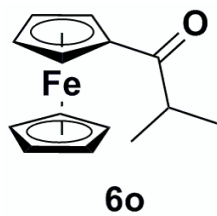

— 7.26

4.78  
4.78  
4.77  
4.50  
4.49  
4.49

3.49  
3.48

3.06  
3.05  
3.04  
3.03  
3.02

— 1.56

1.21  
1.20

— -0.00

S83

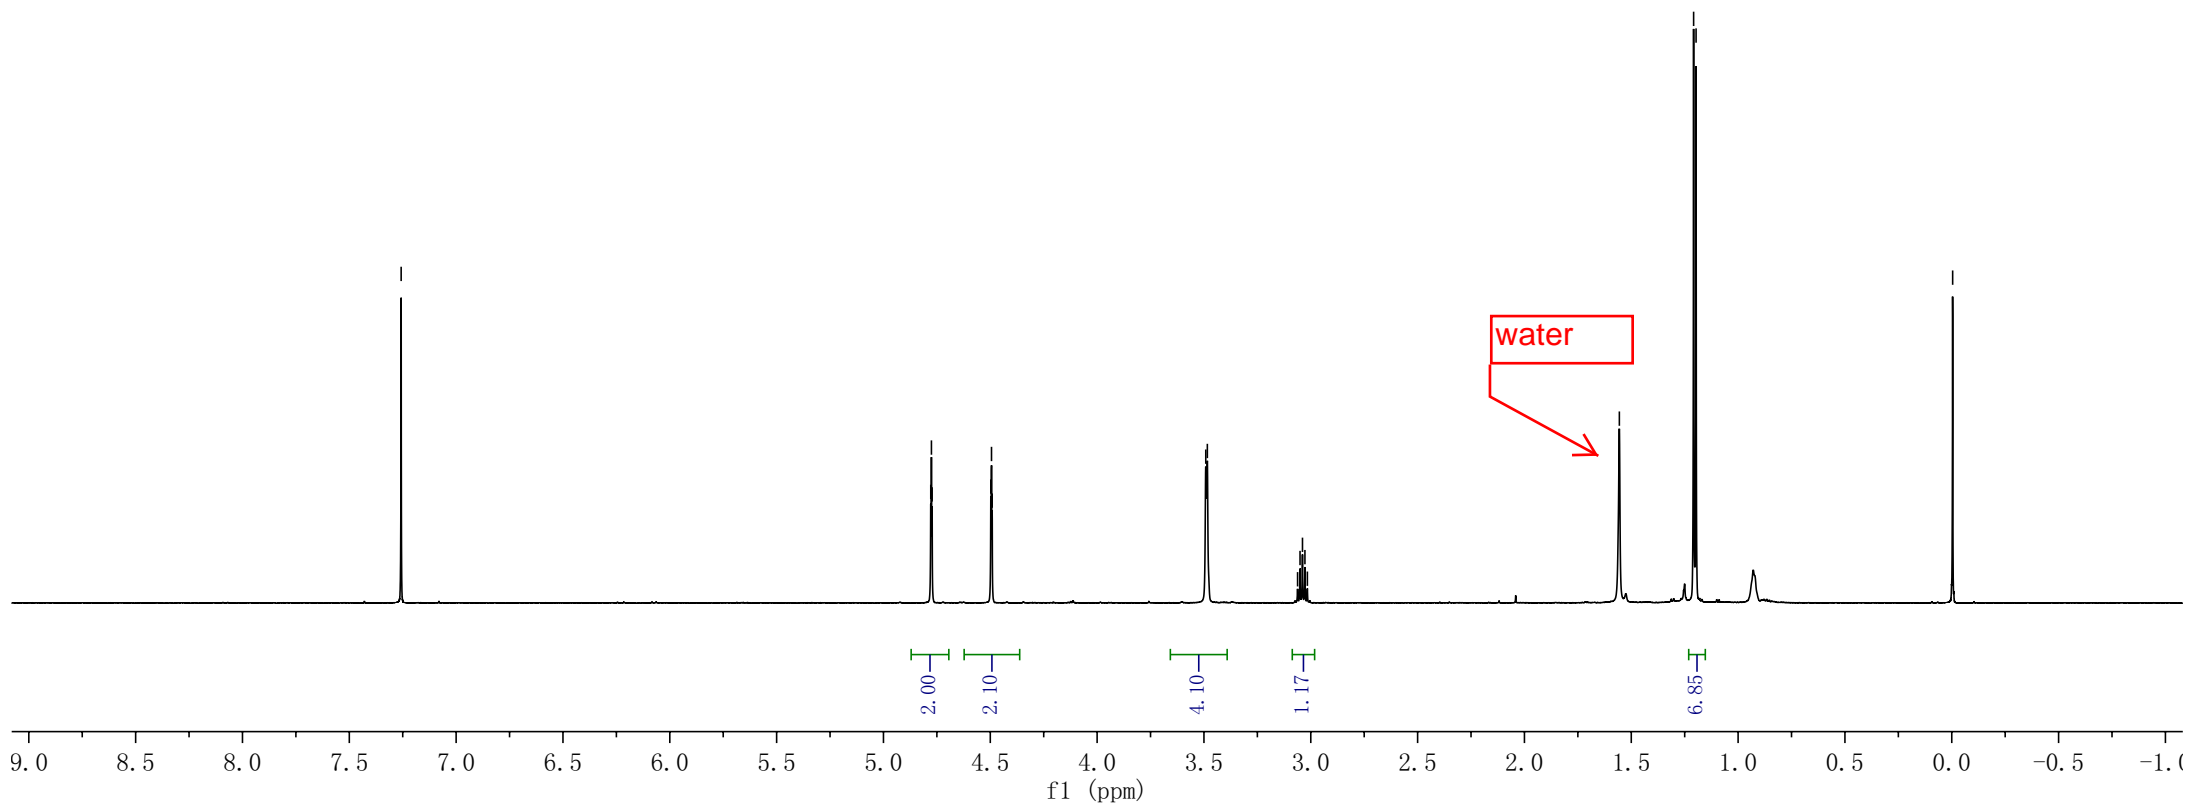

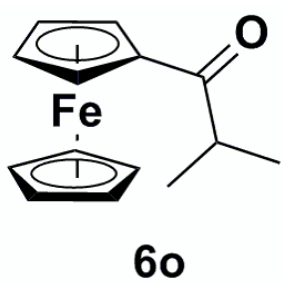

—208.49

78.15  
77.37  
77.16  
76.95  
72.16  
69.56  
69.42

—37.22

—19.53

S84



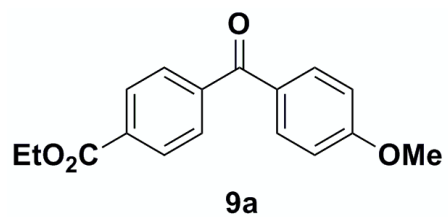

8.176  
8.171  
8.162  
8.157  
7.854  
7.850  
7.840  
7.837  
7.263  
7.262

4.451  
4.439  
4.428  
4.416  
— 3.975

— 2.046  
1.560  
1.443  
1.431  
1.419  
1.260  
1.260

— 0.001

585

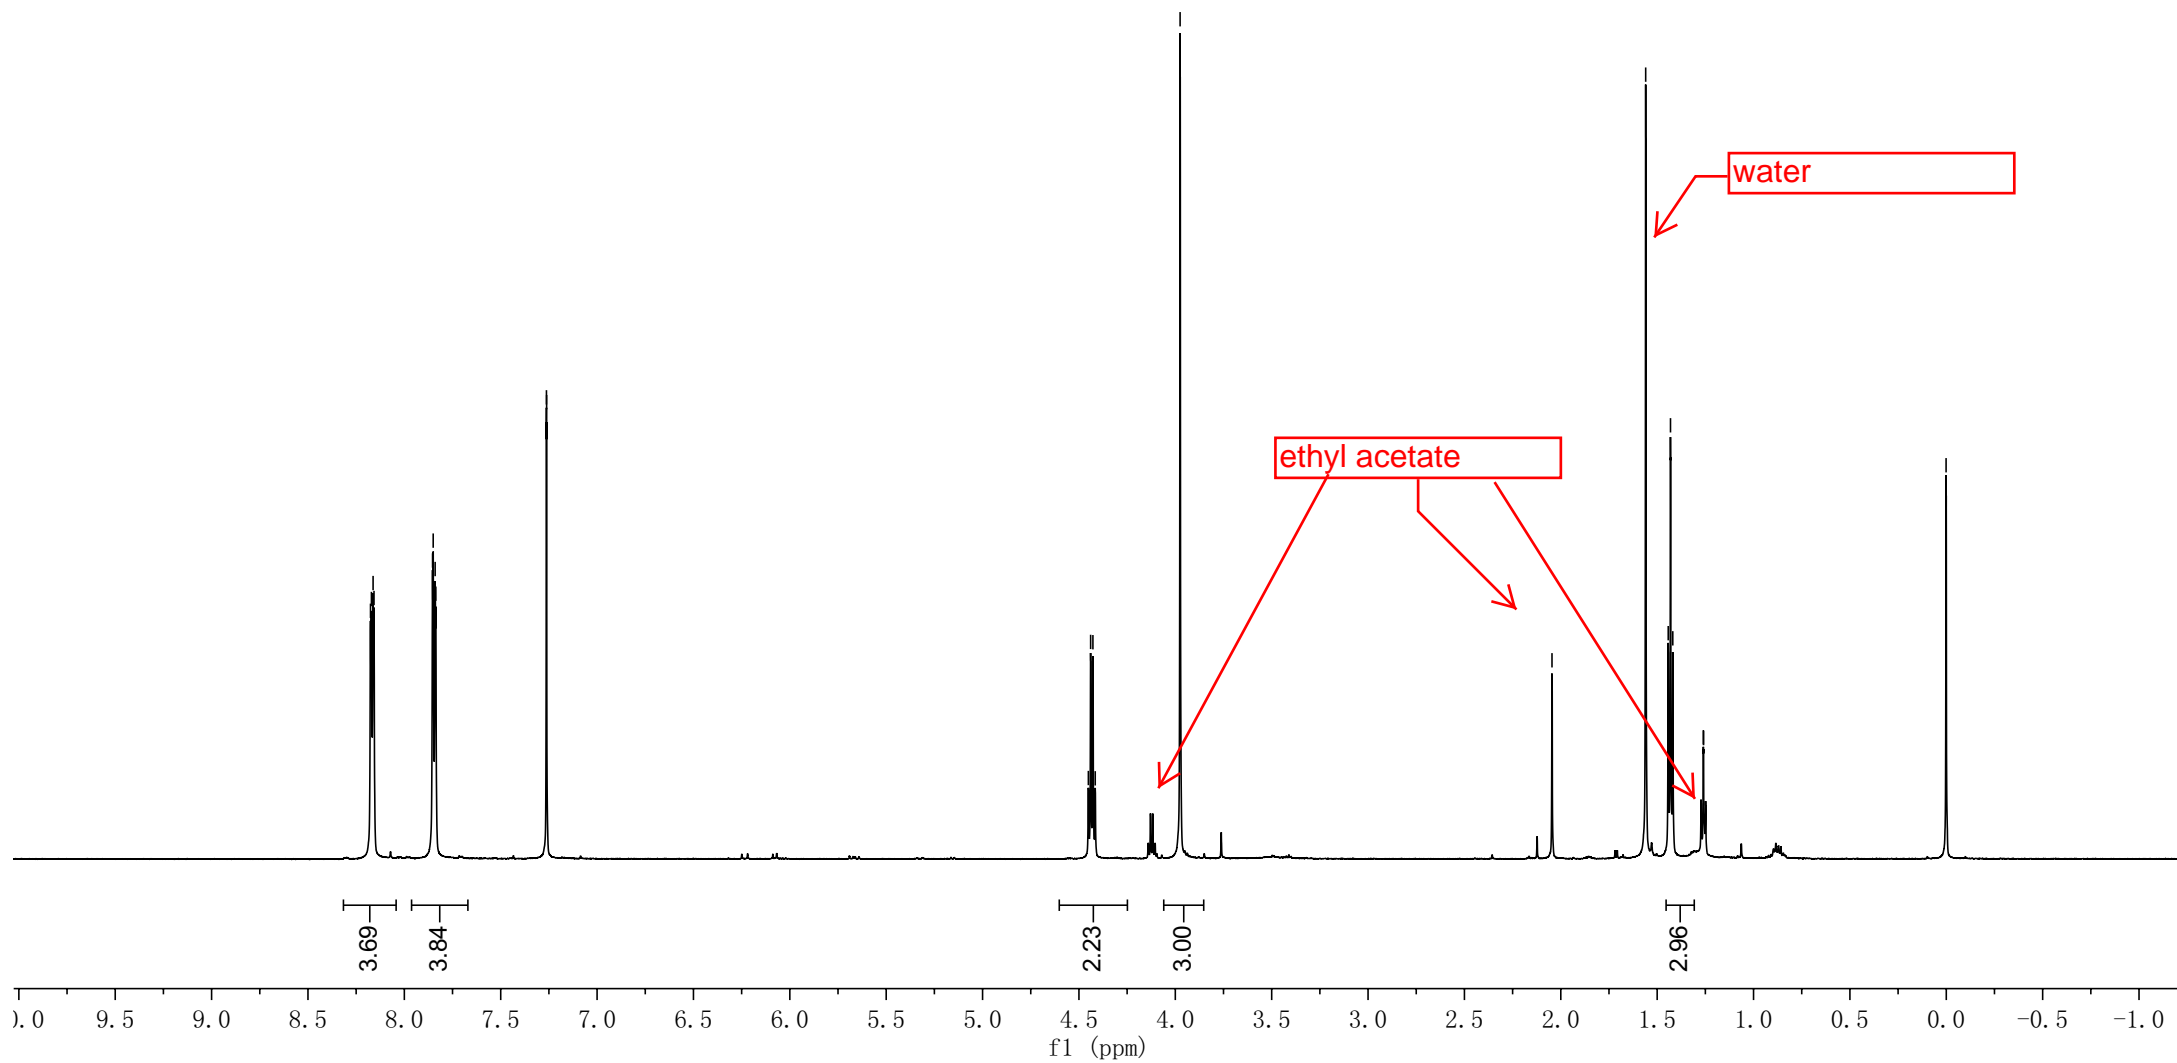

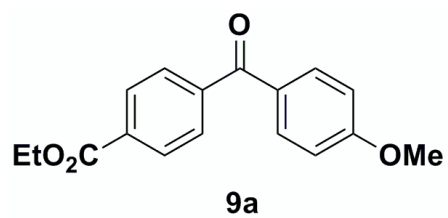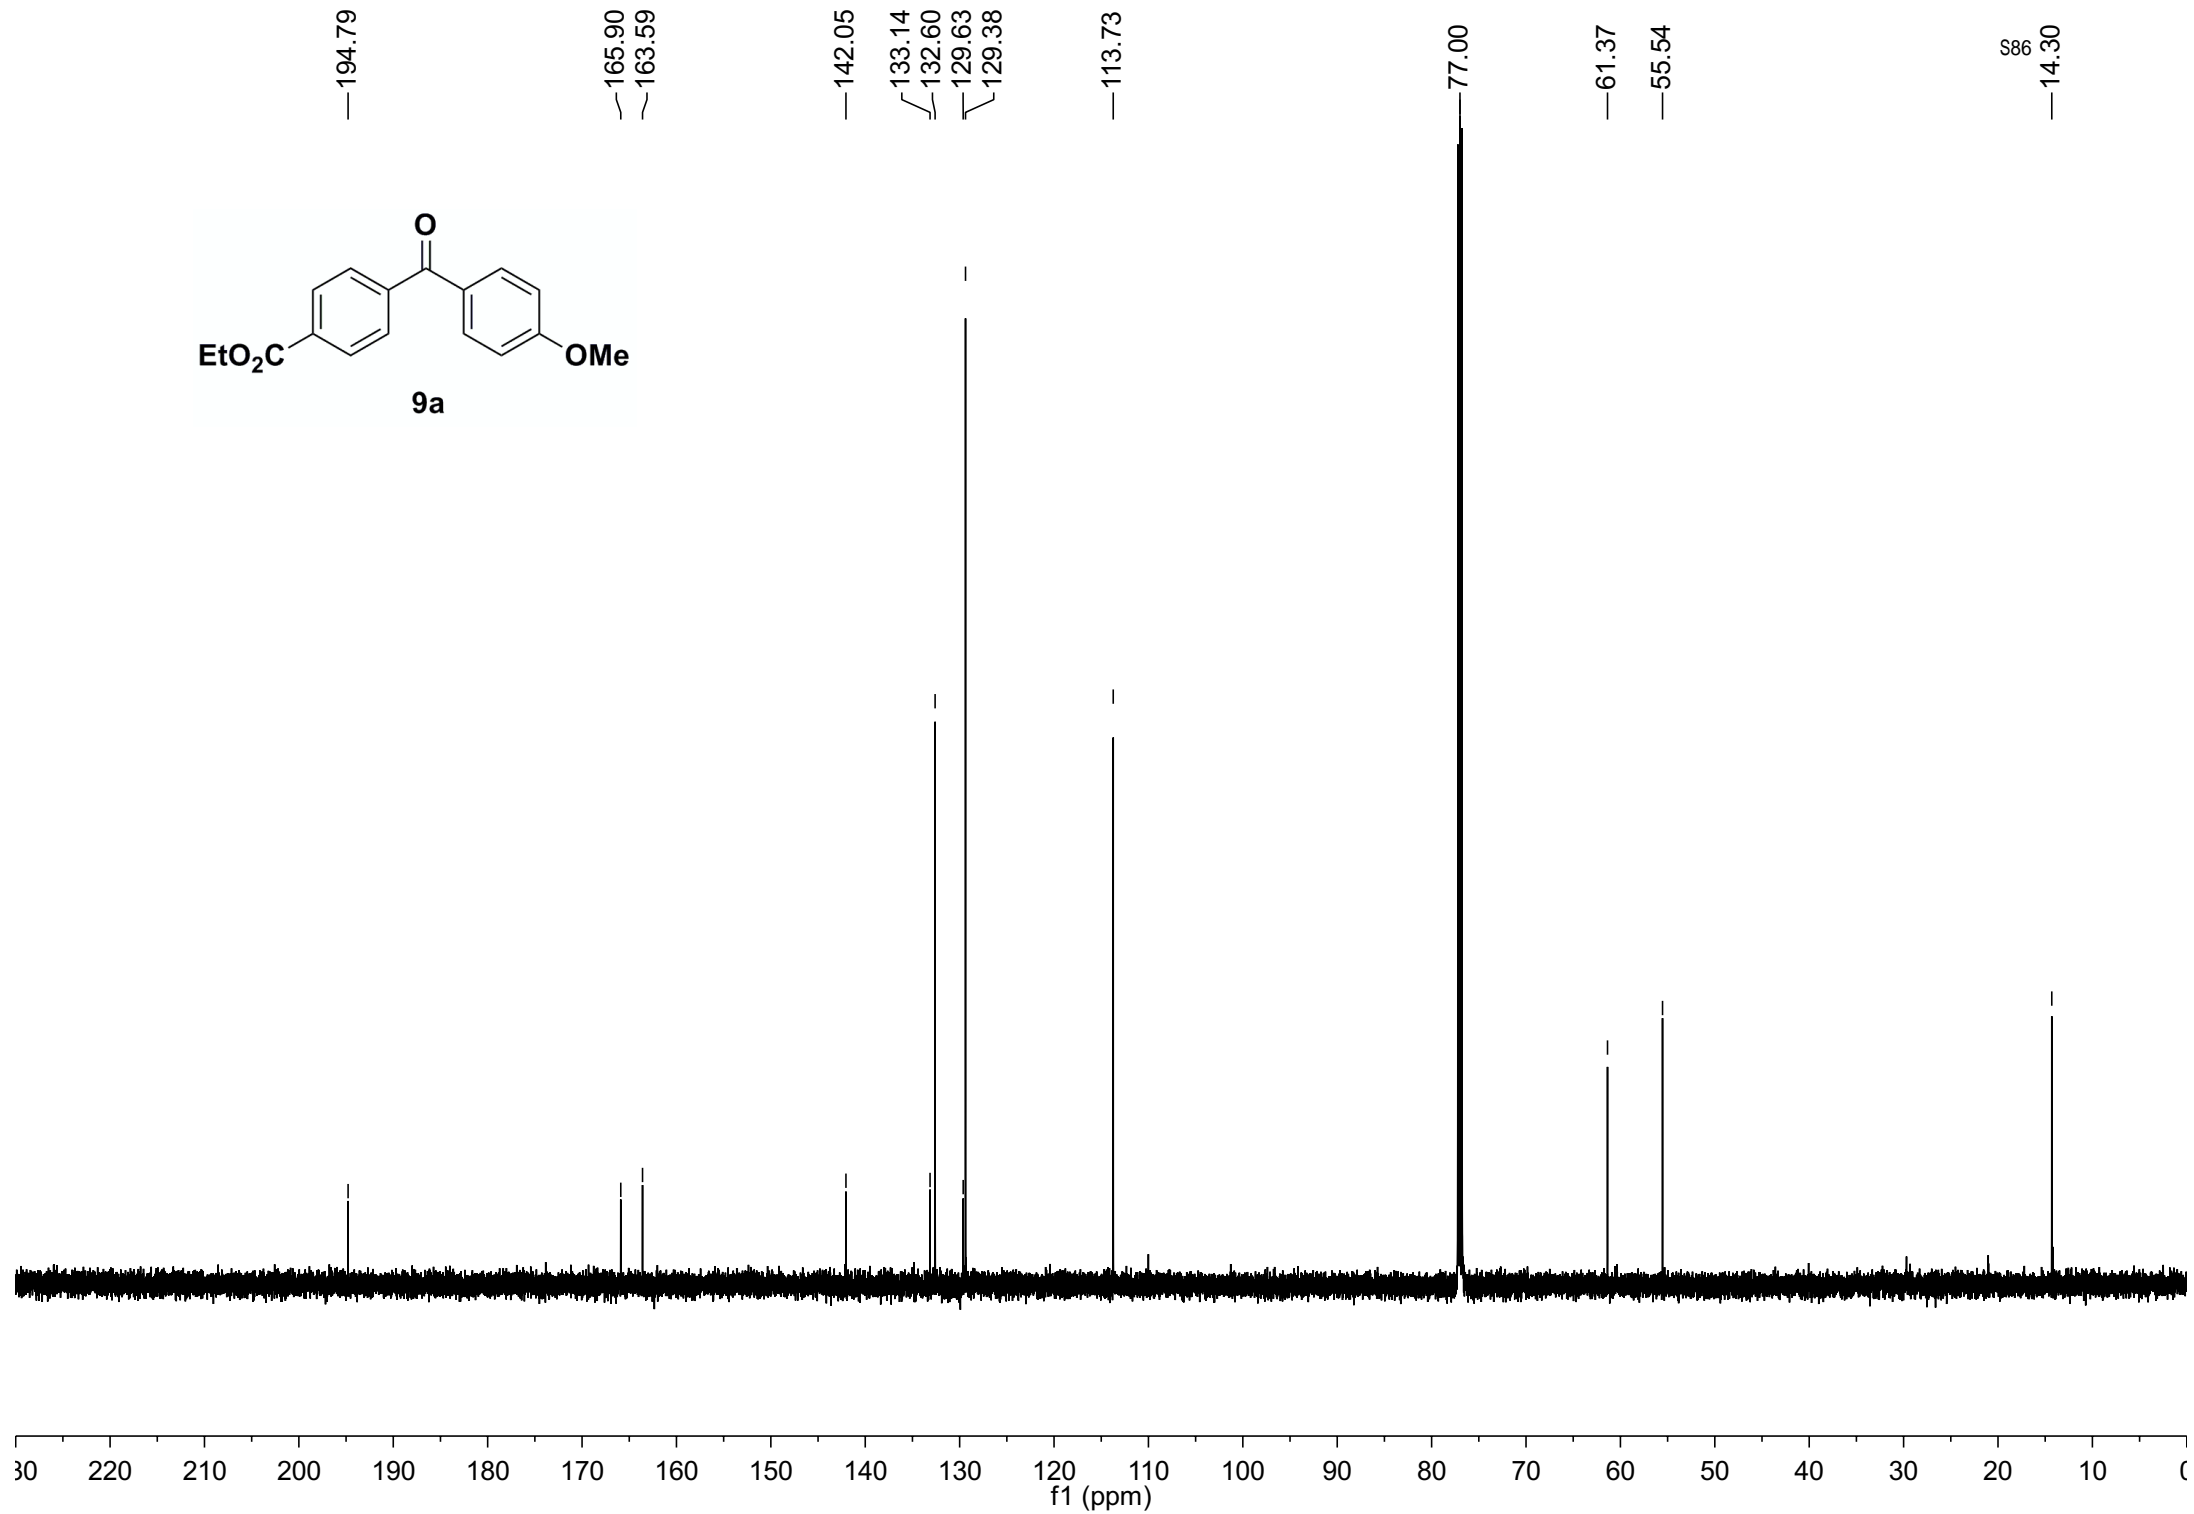

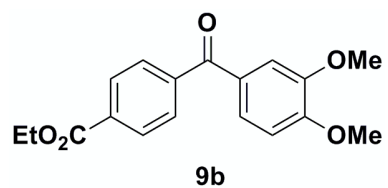

8.15  
8.14  
7.80  
7.78  
7.50  
7.50  
6.96  
6.89

4.44  
4.43  
4.42  
4.41  
3.97  
3.95

1.56  
1.44  
1.43  
1.41

— 0.00

S87

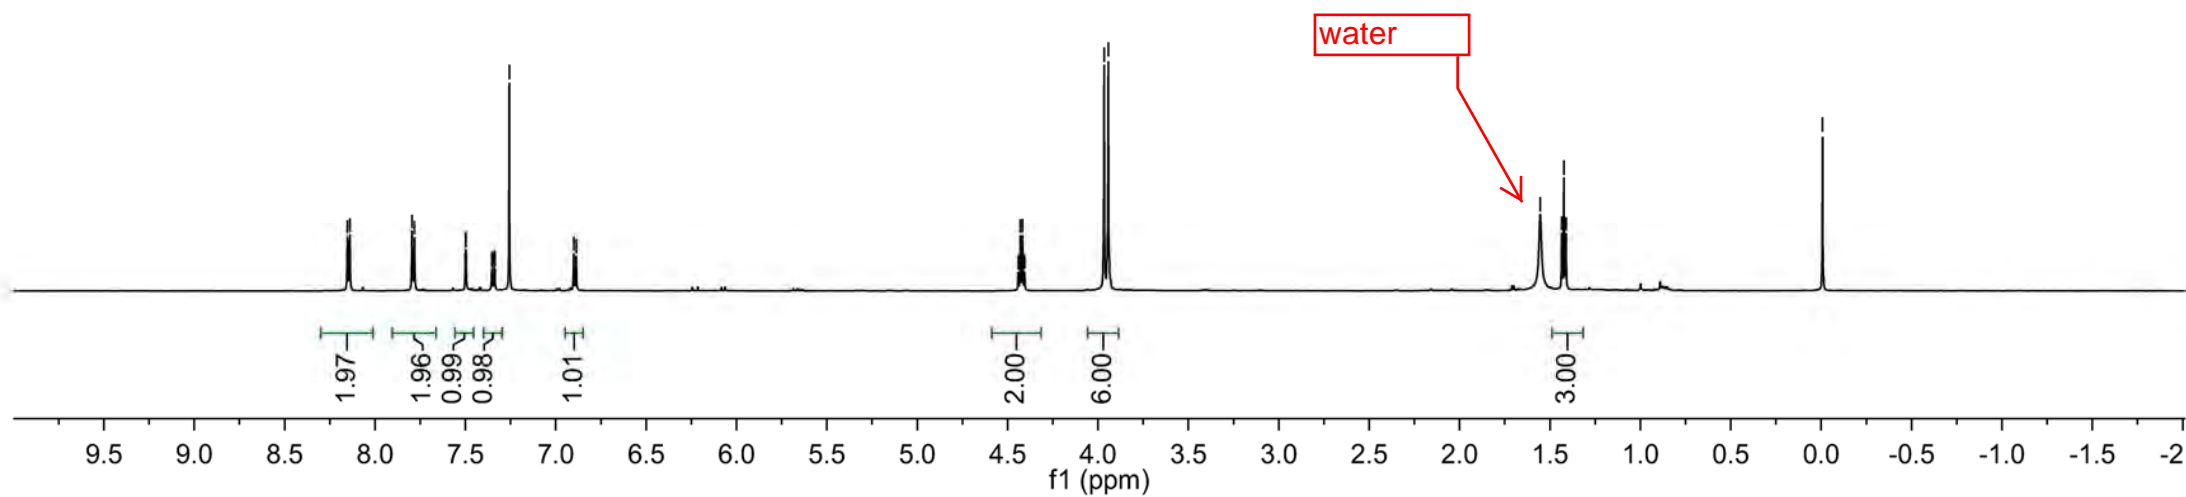

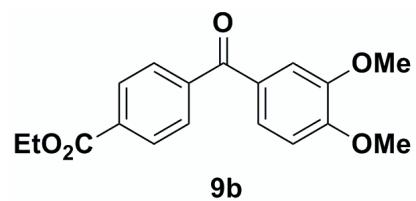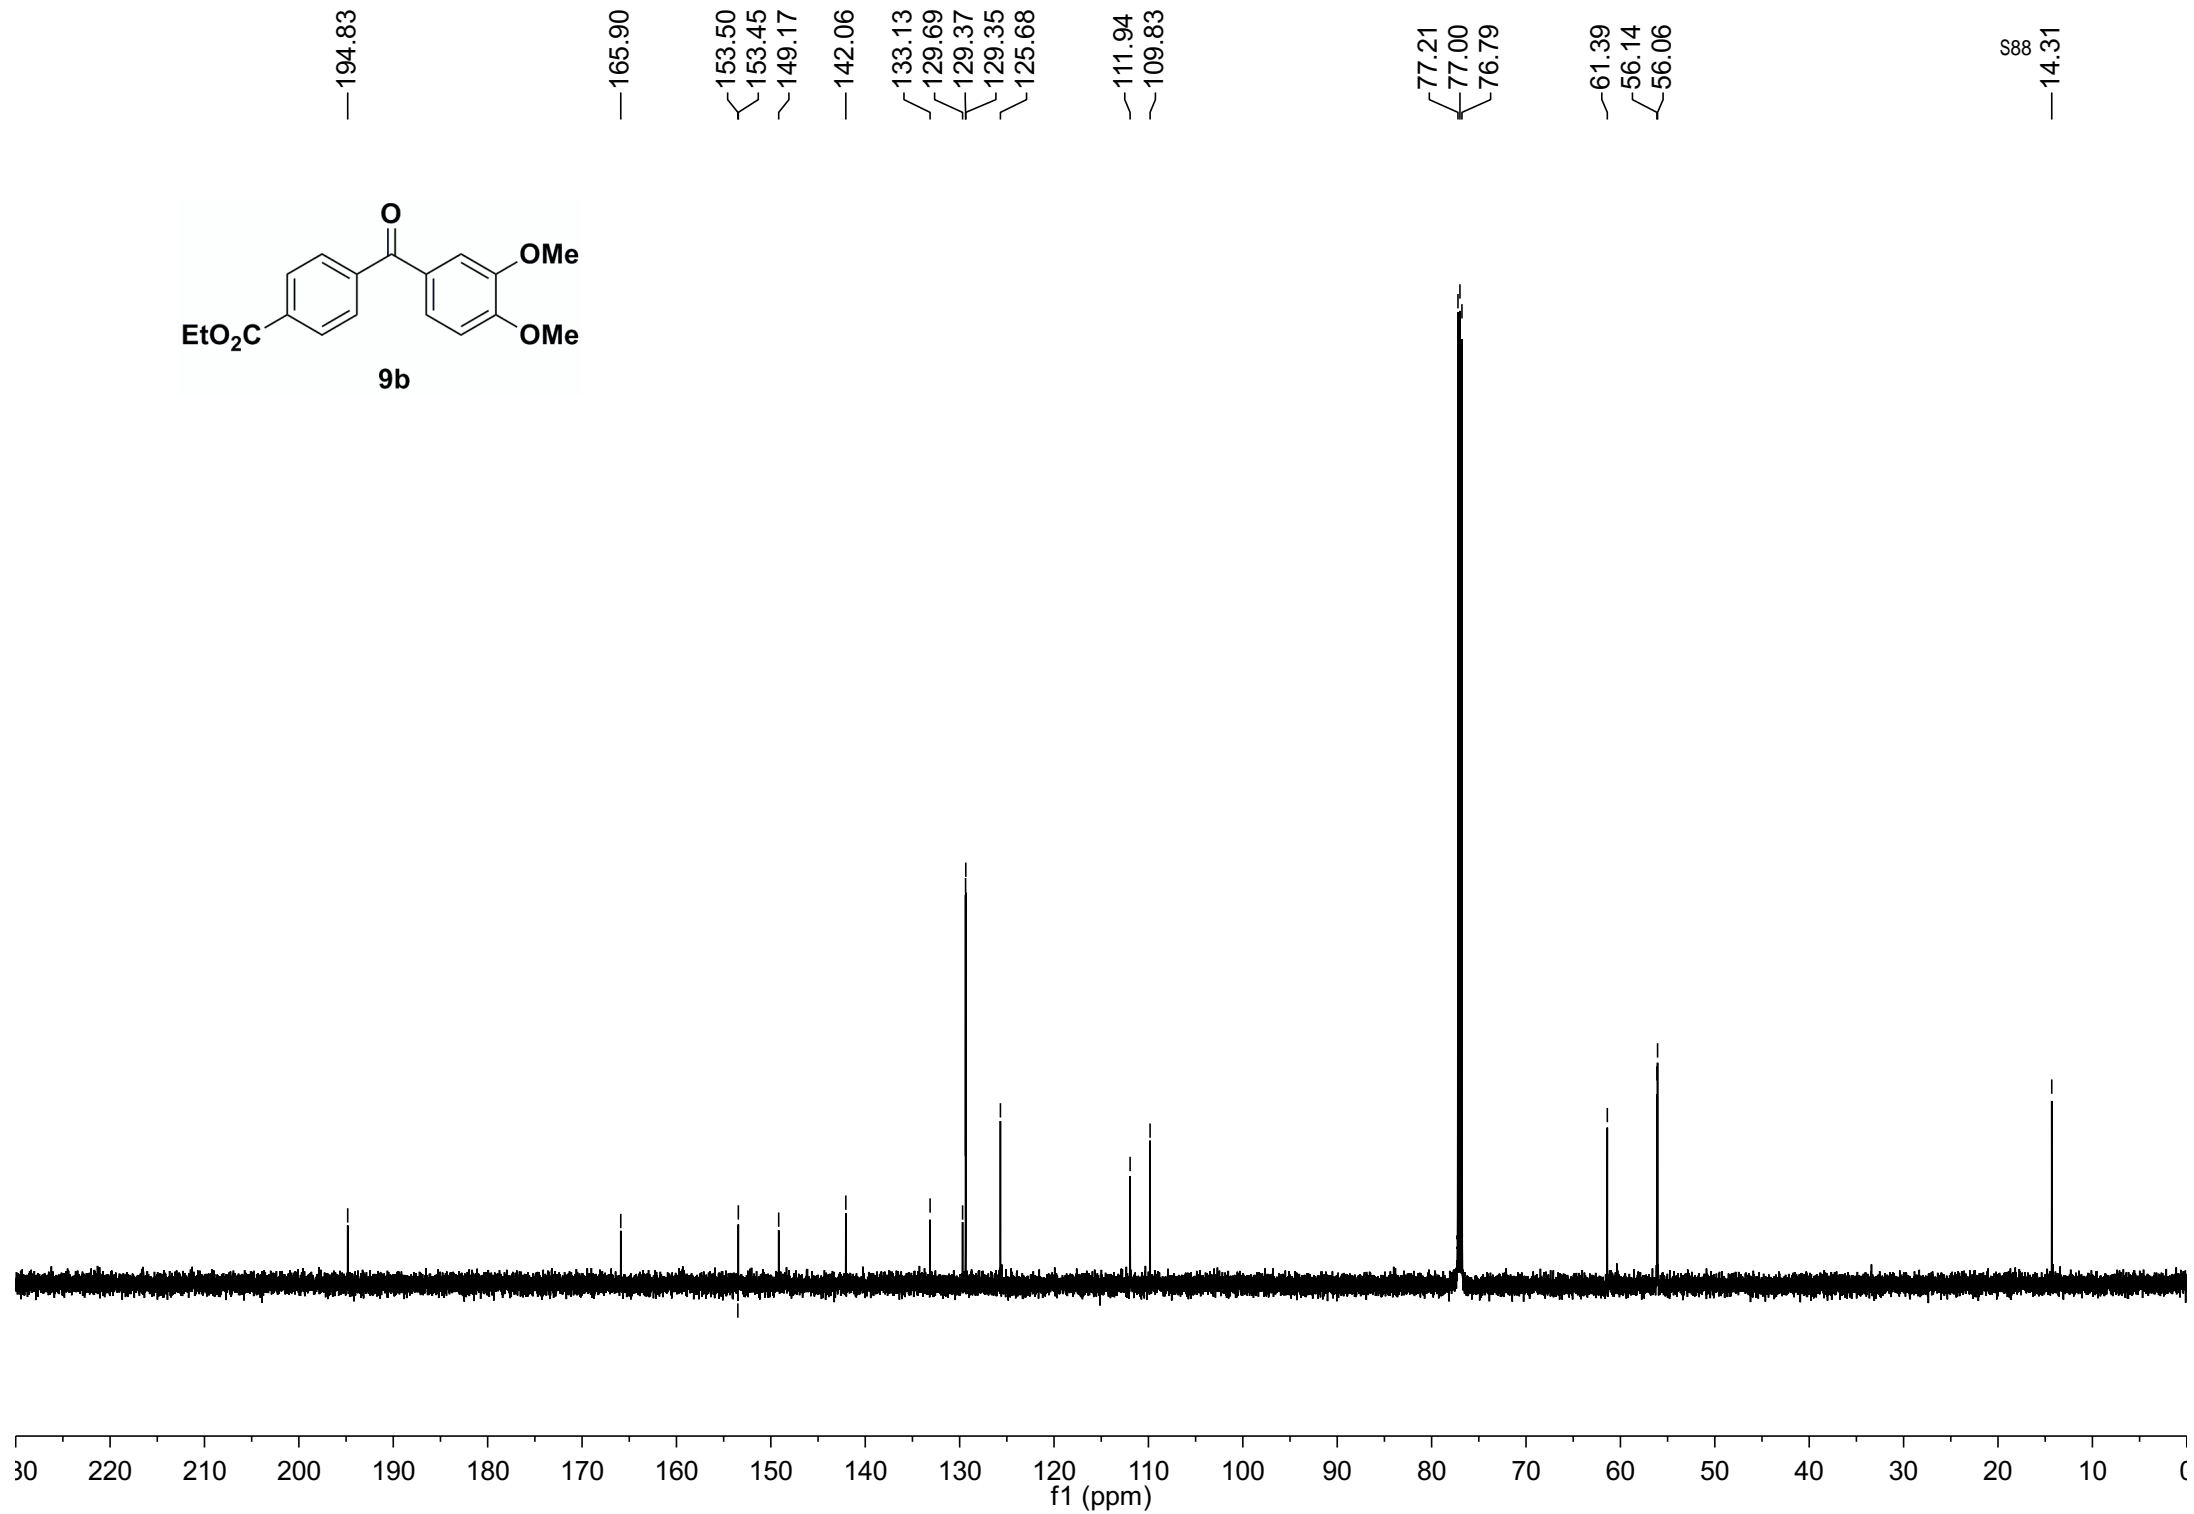

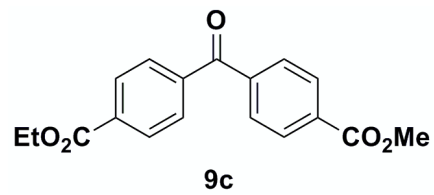

8.17  
 8.17  
 8.16  
 8.15  
 7.85  
 7.85  
 7.84  
 7.83  
 7.26  
 7.26

4.45  
 4.44  
 4.42  
 4.41  
 3.97

1.56  
 1.44  
 1.43  
 1.42

0.00  
 0.00  
 0.89

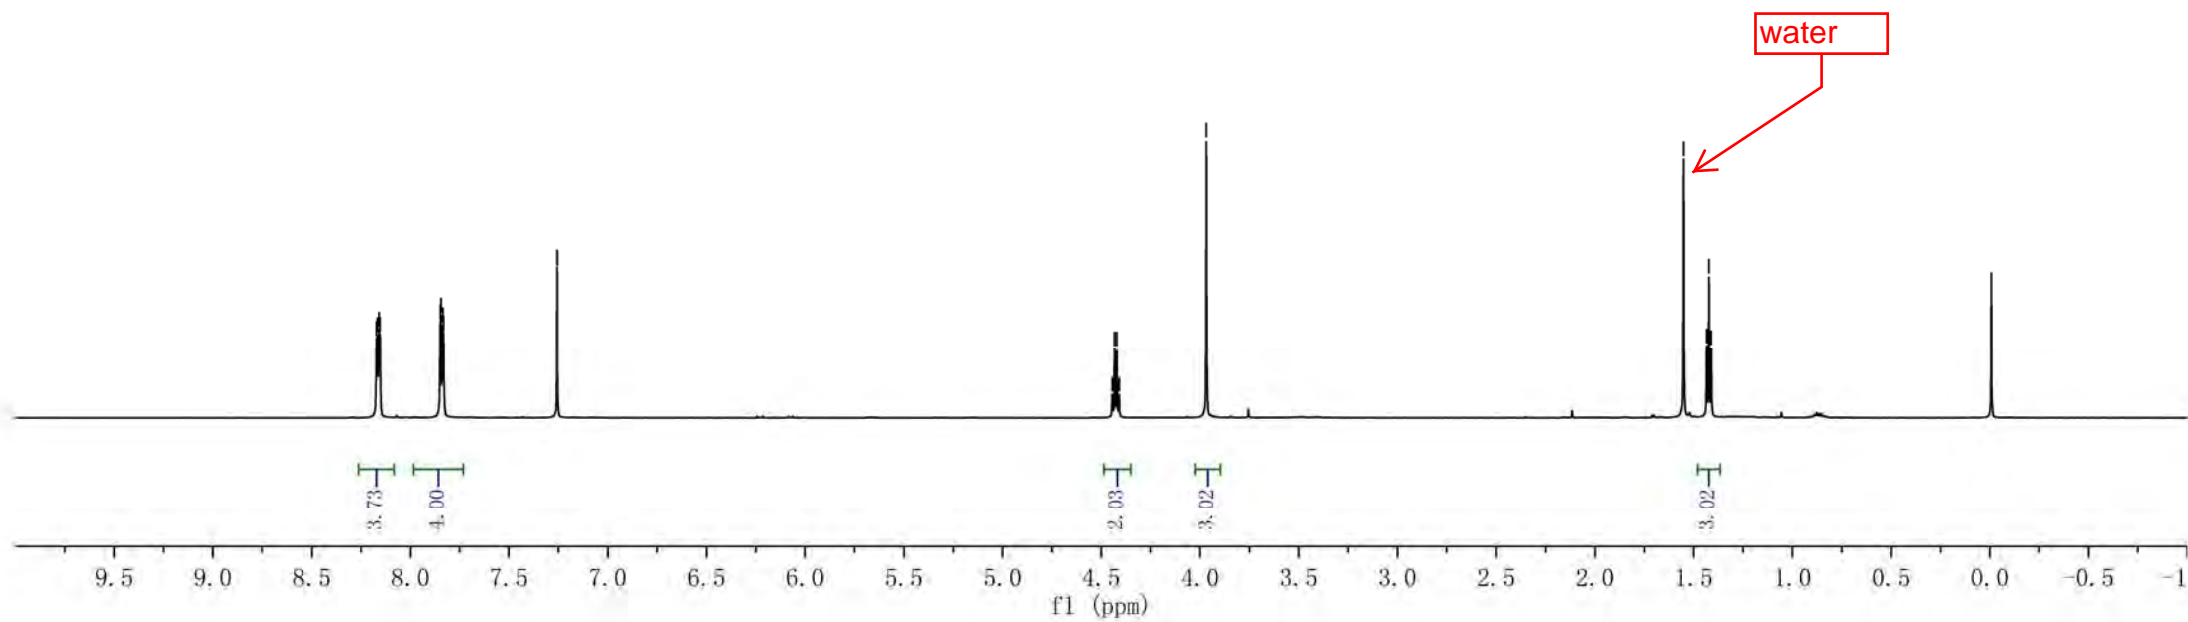

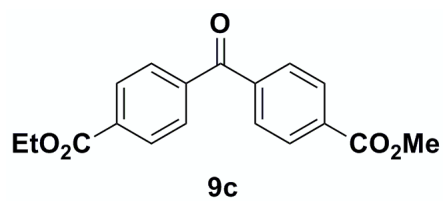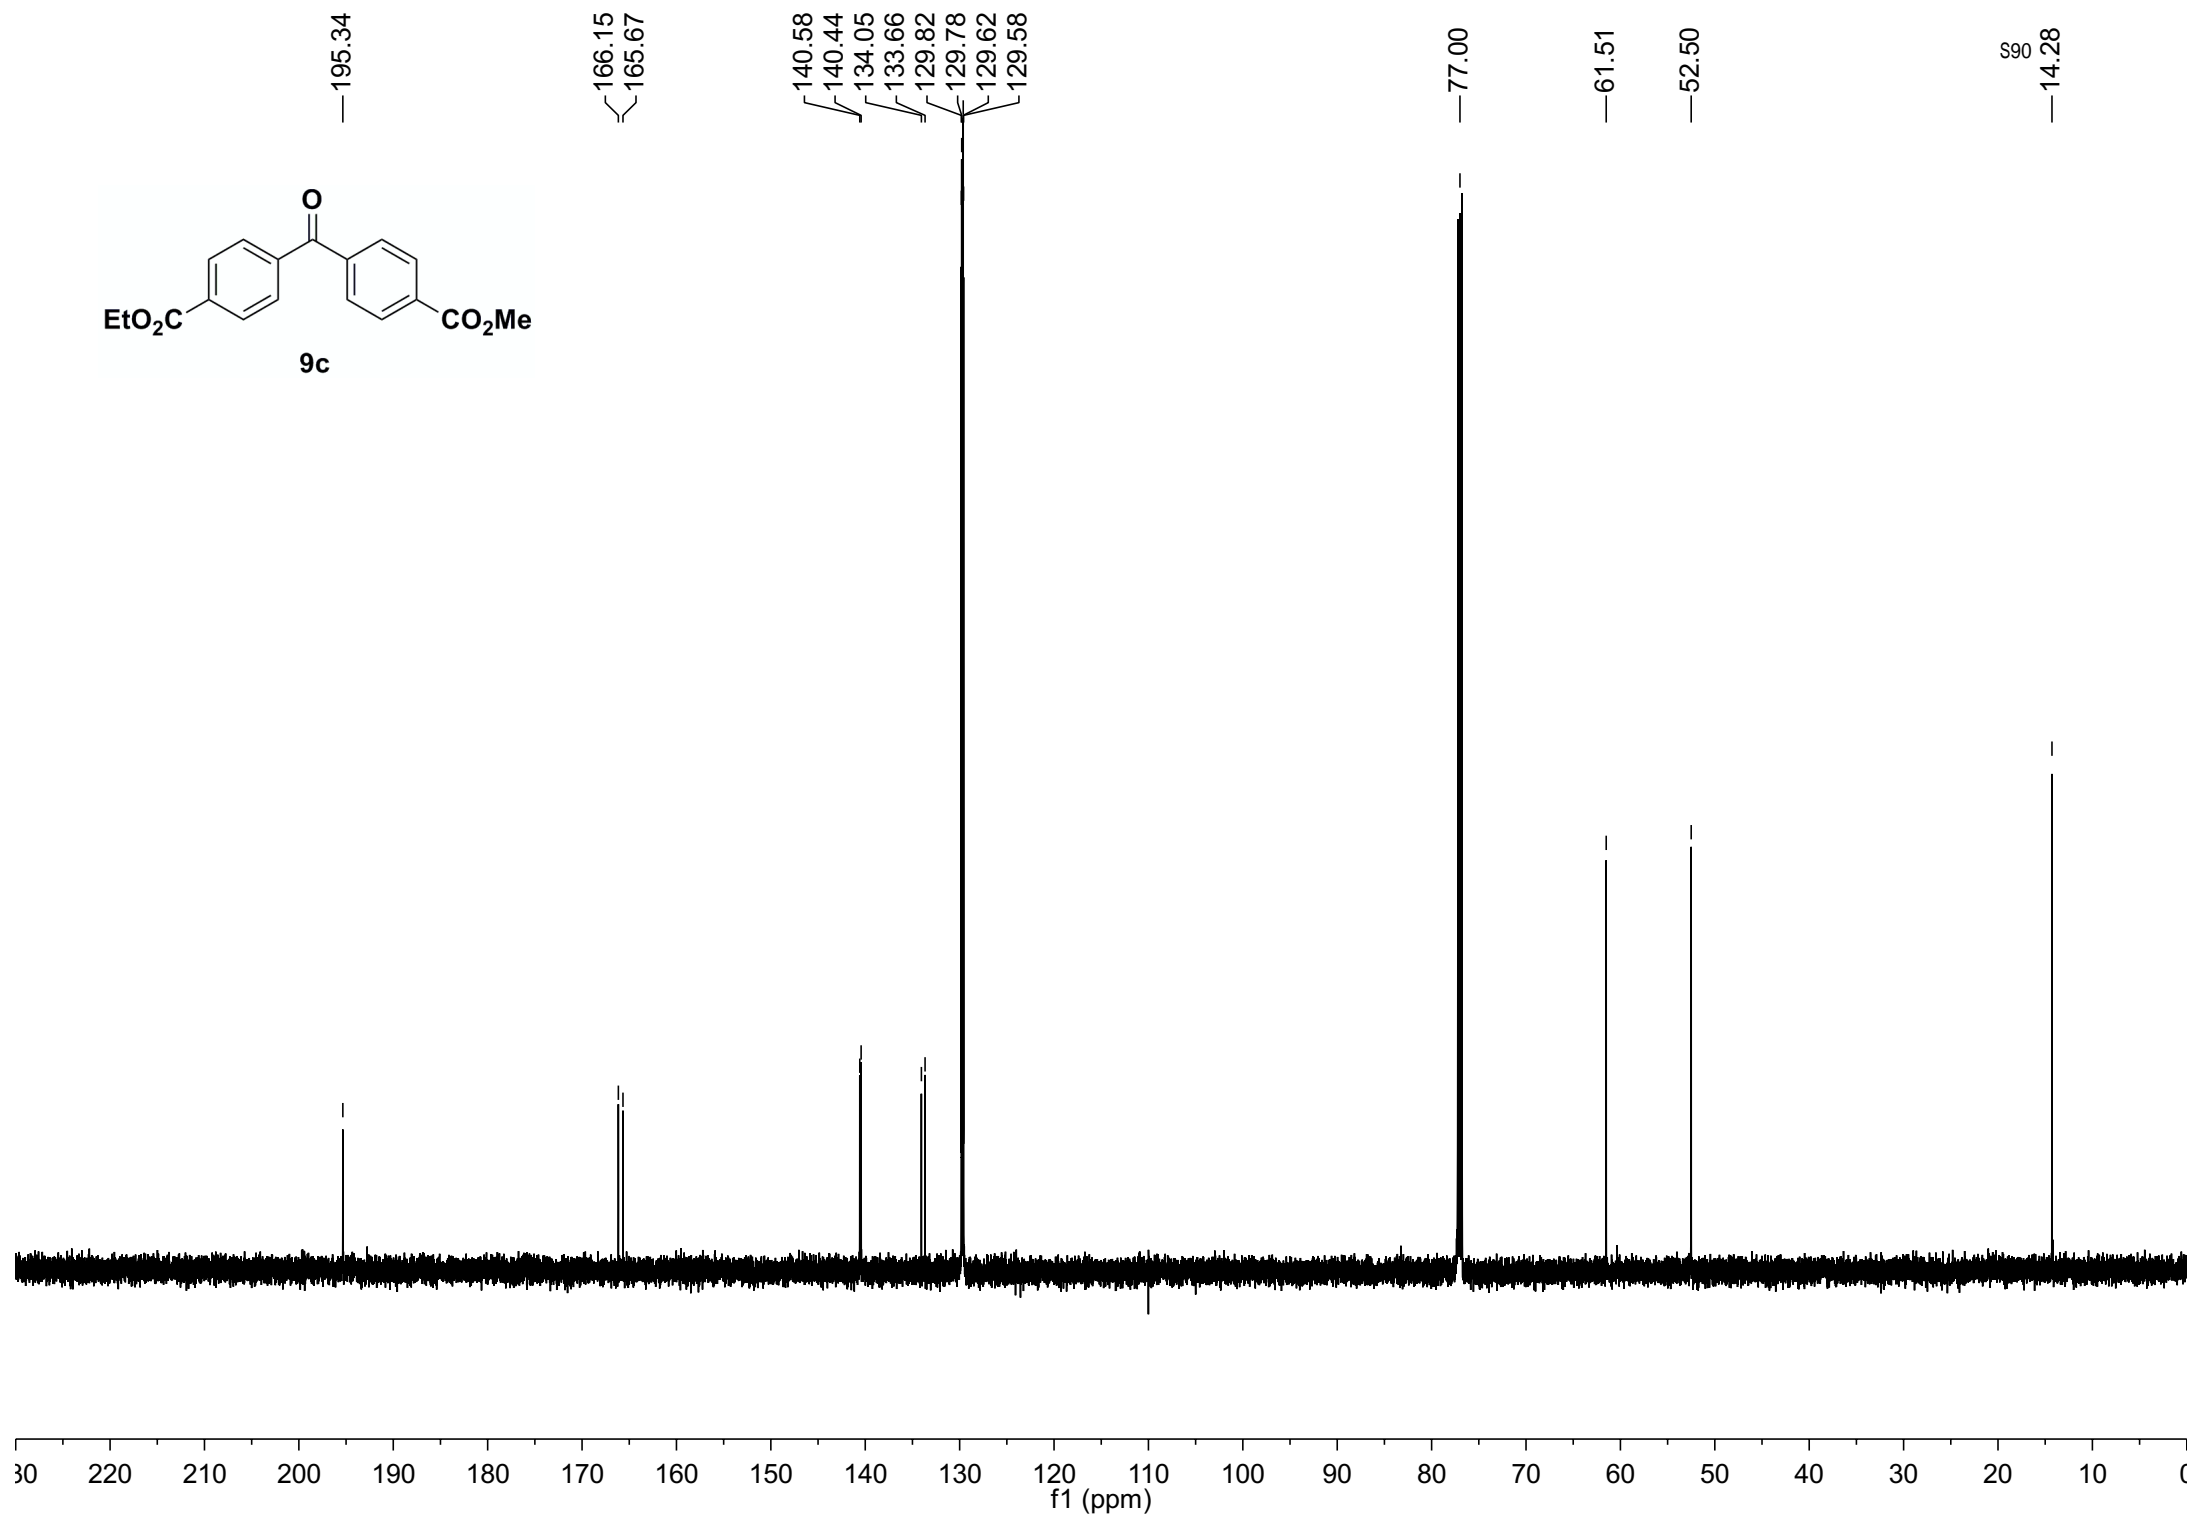

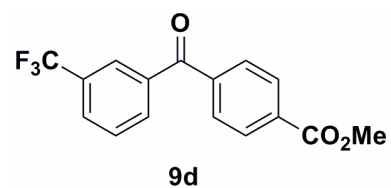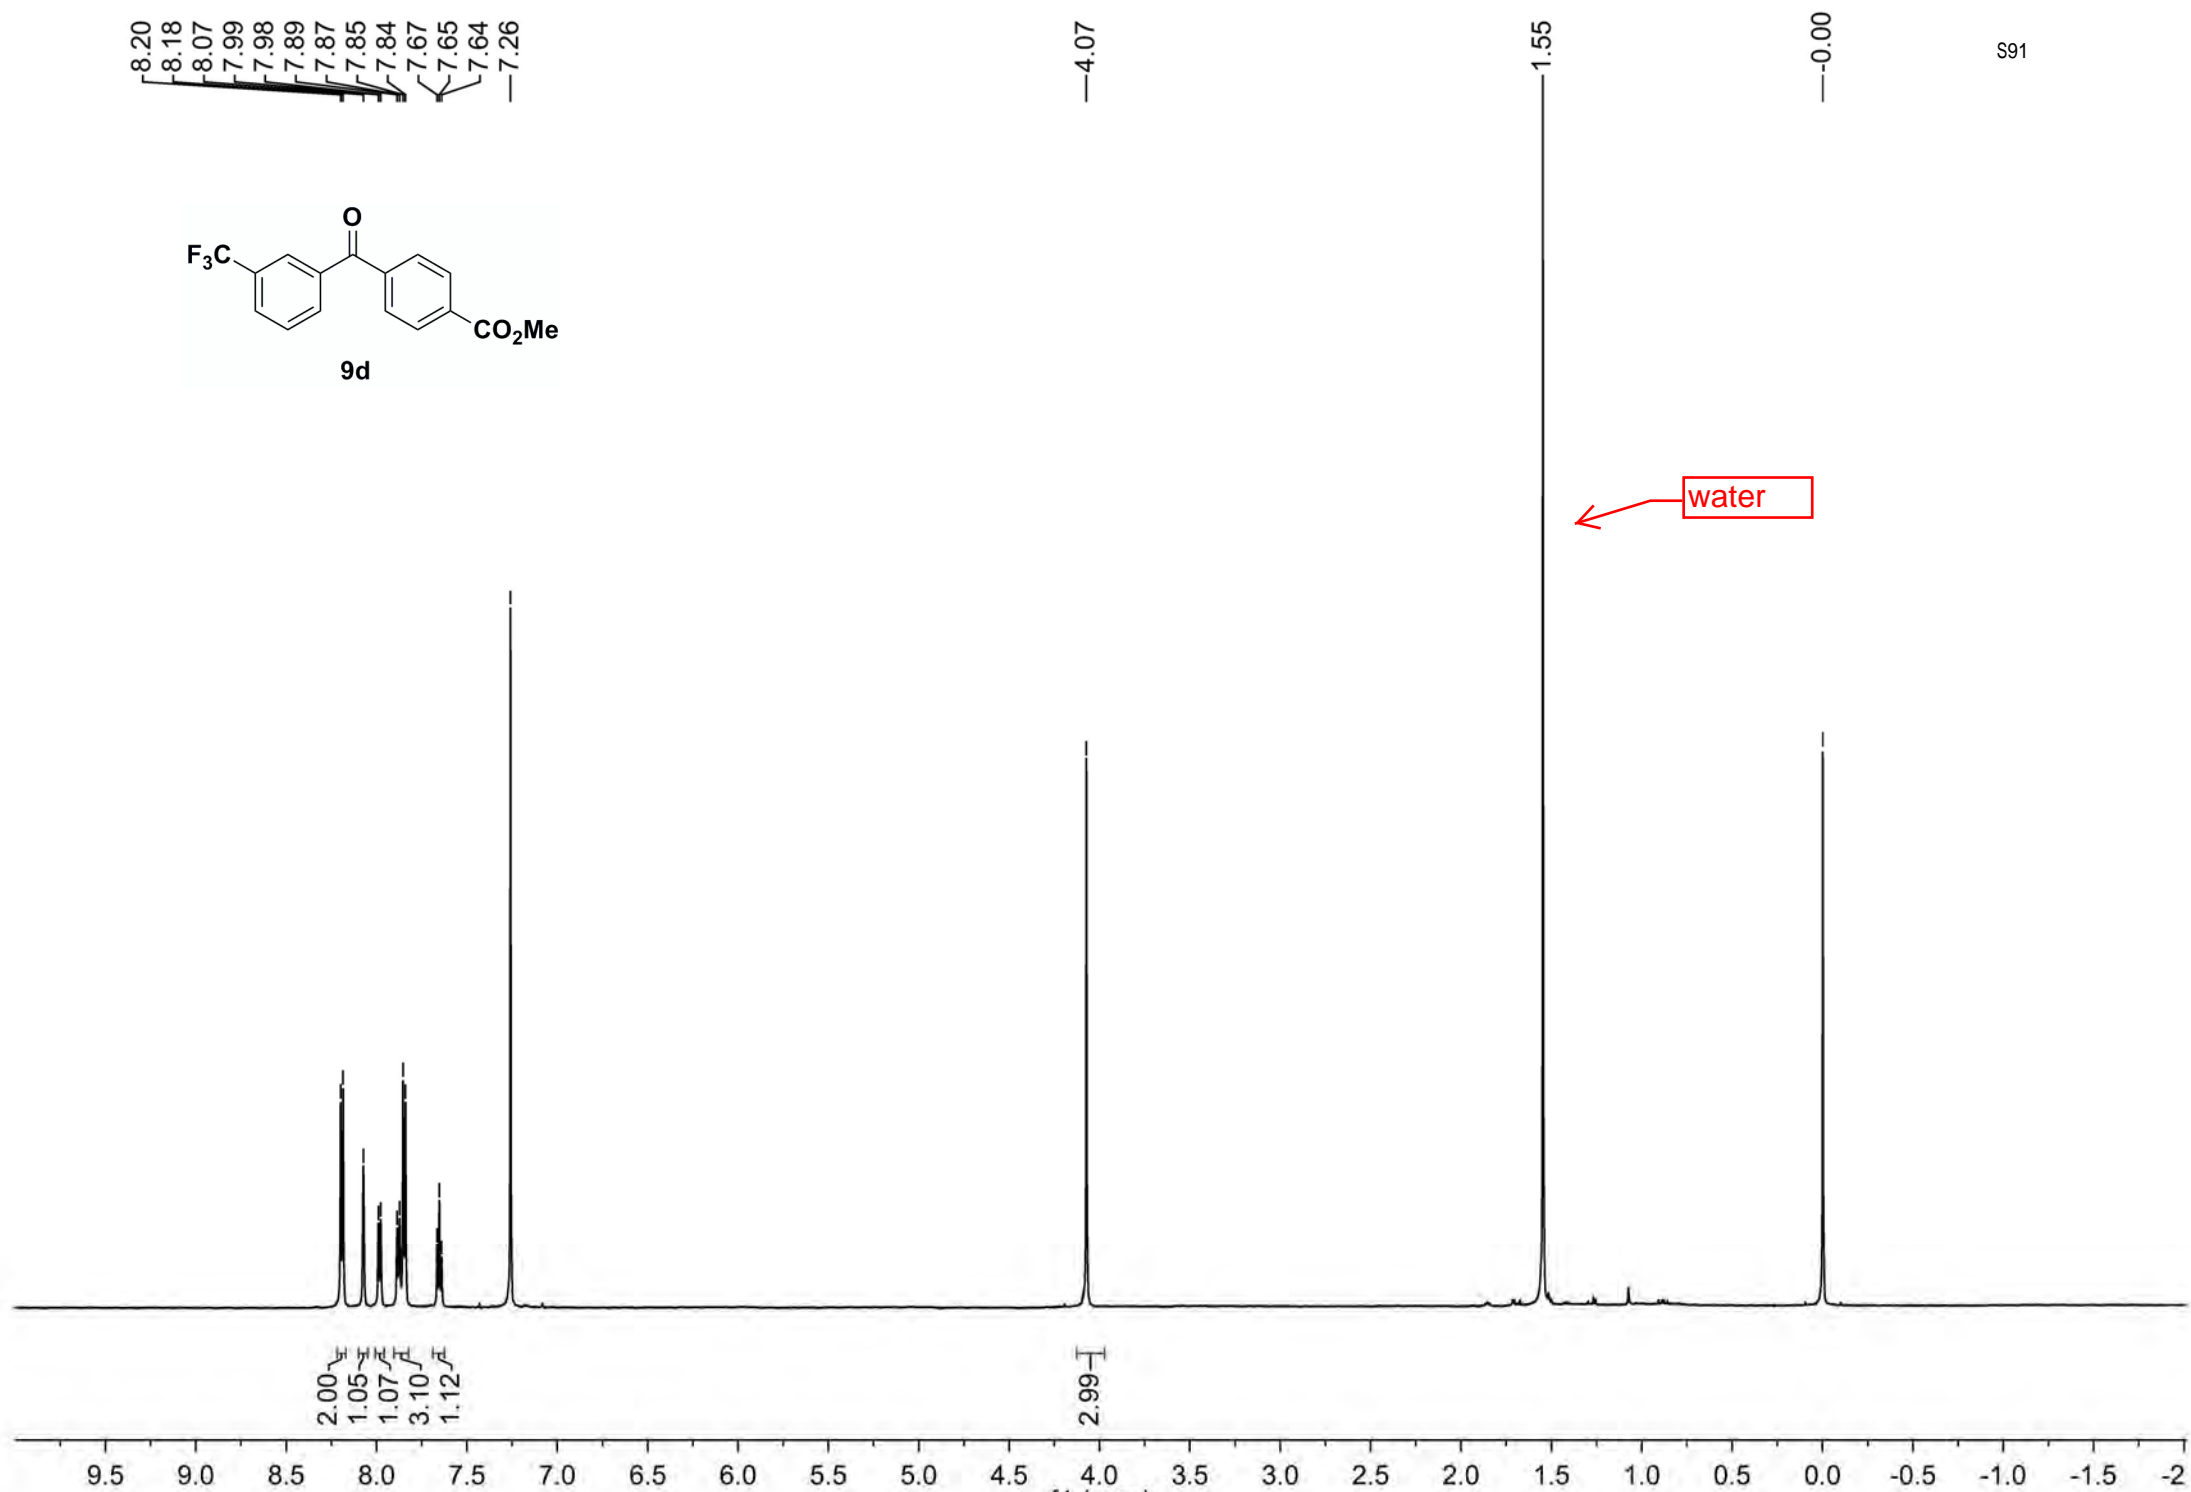

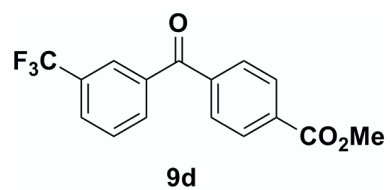

-63.208

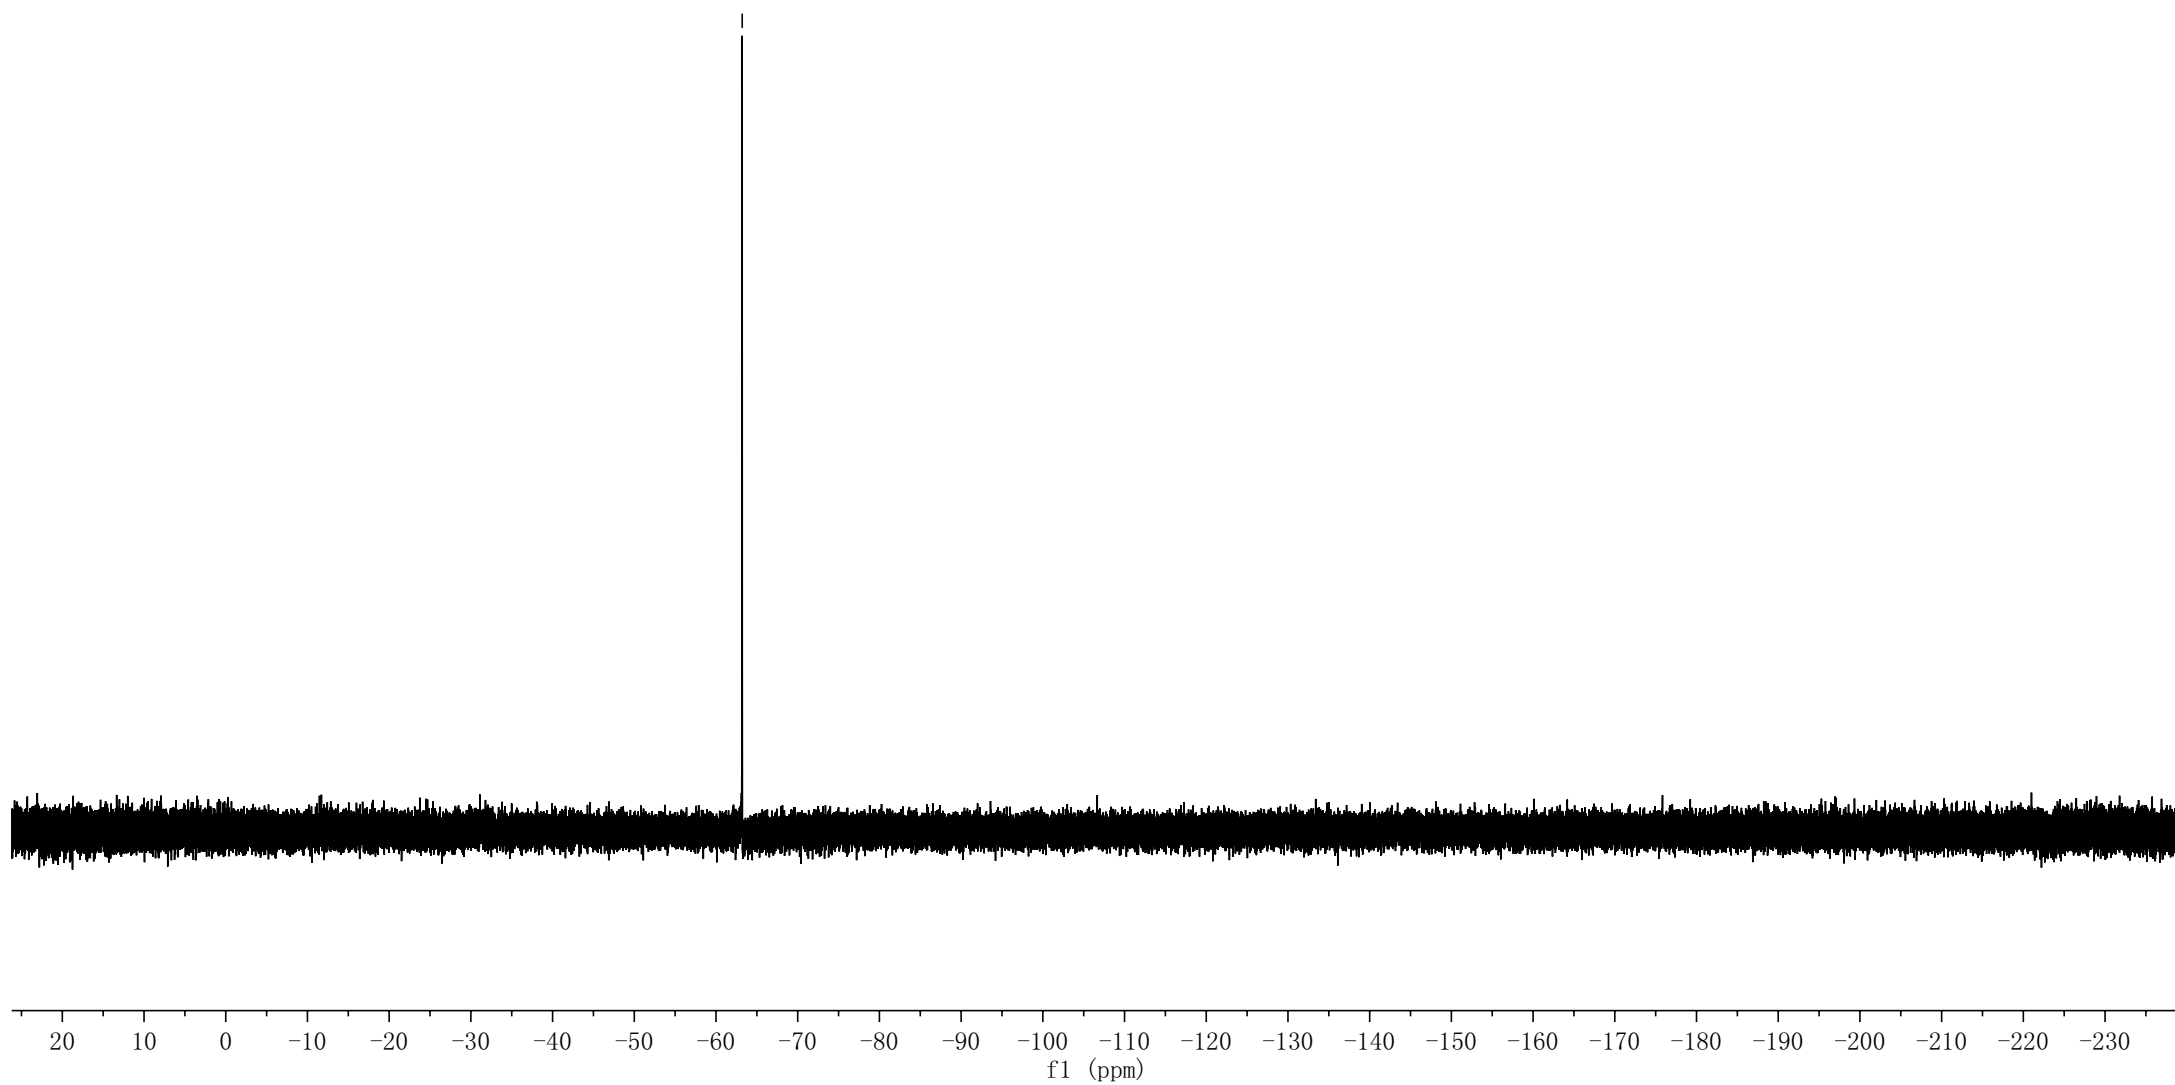

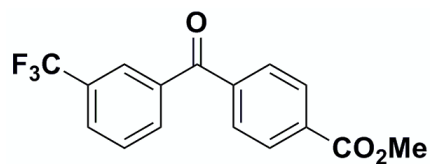

**9d**

—194.493

—165.598  
 —140.249  
 —137.620  
 —134.155  
 —133.112  
 —131.516  
 —131.299  
 —131.080  
 —130.863  
 —129.749  
 —129.644  
 —129.298  
 —129.275  
 —129.250  
 —129.113  
 —126.740  
 —126.717  
 —126.692  
 —126.667  
 —126.300  
 —124.463  
 —122.656  
 —120.873

77.209  
 76.997  
 76.785  
 74.723

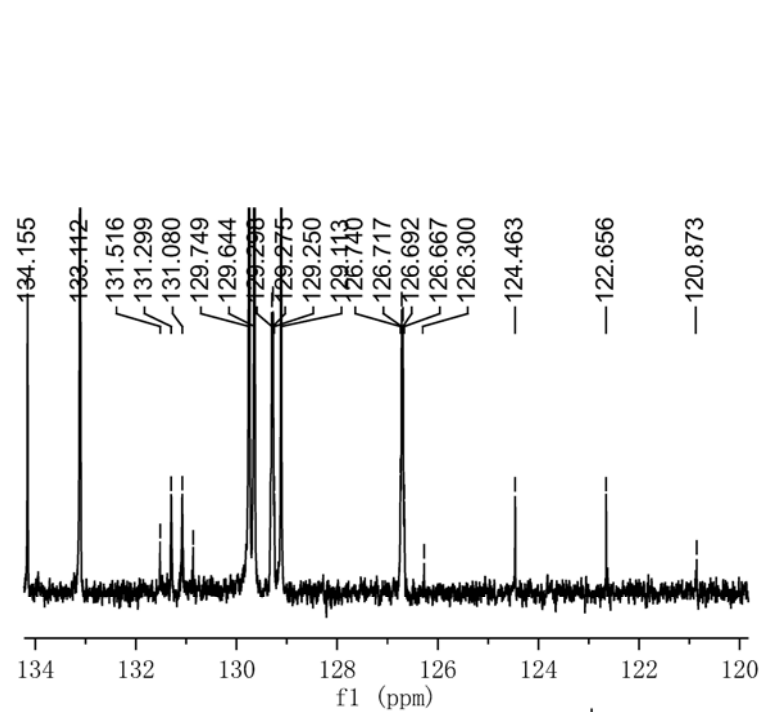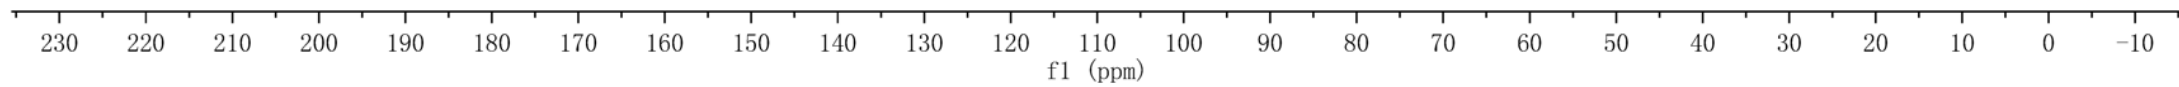

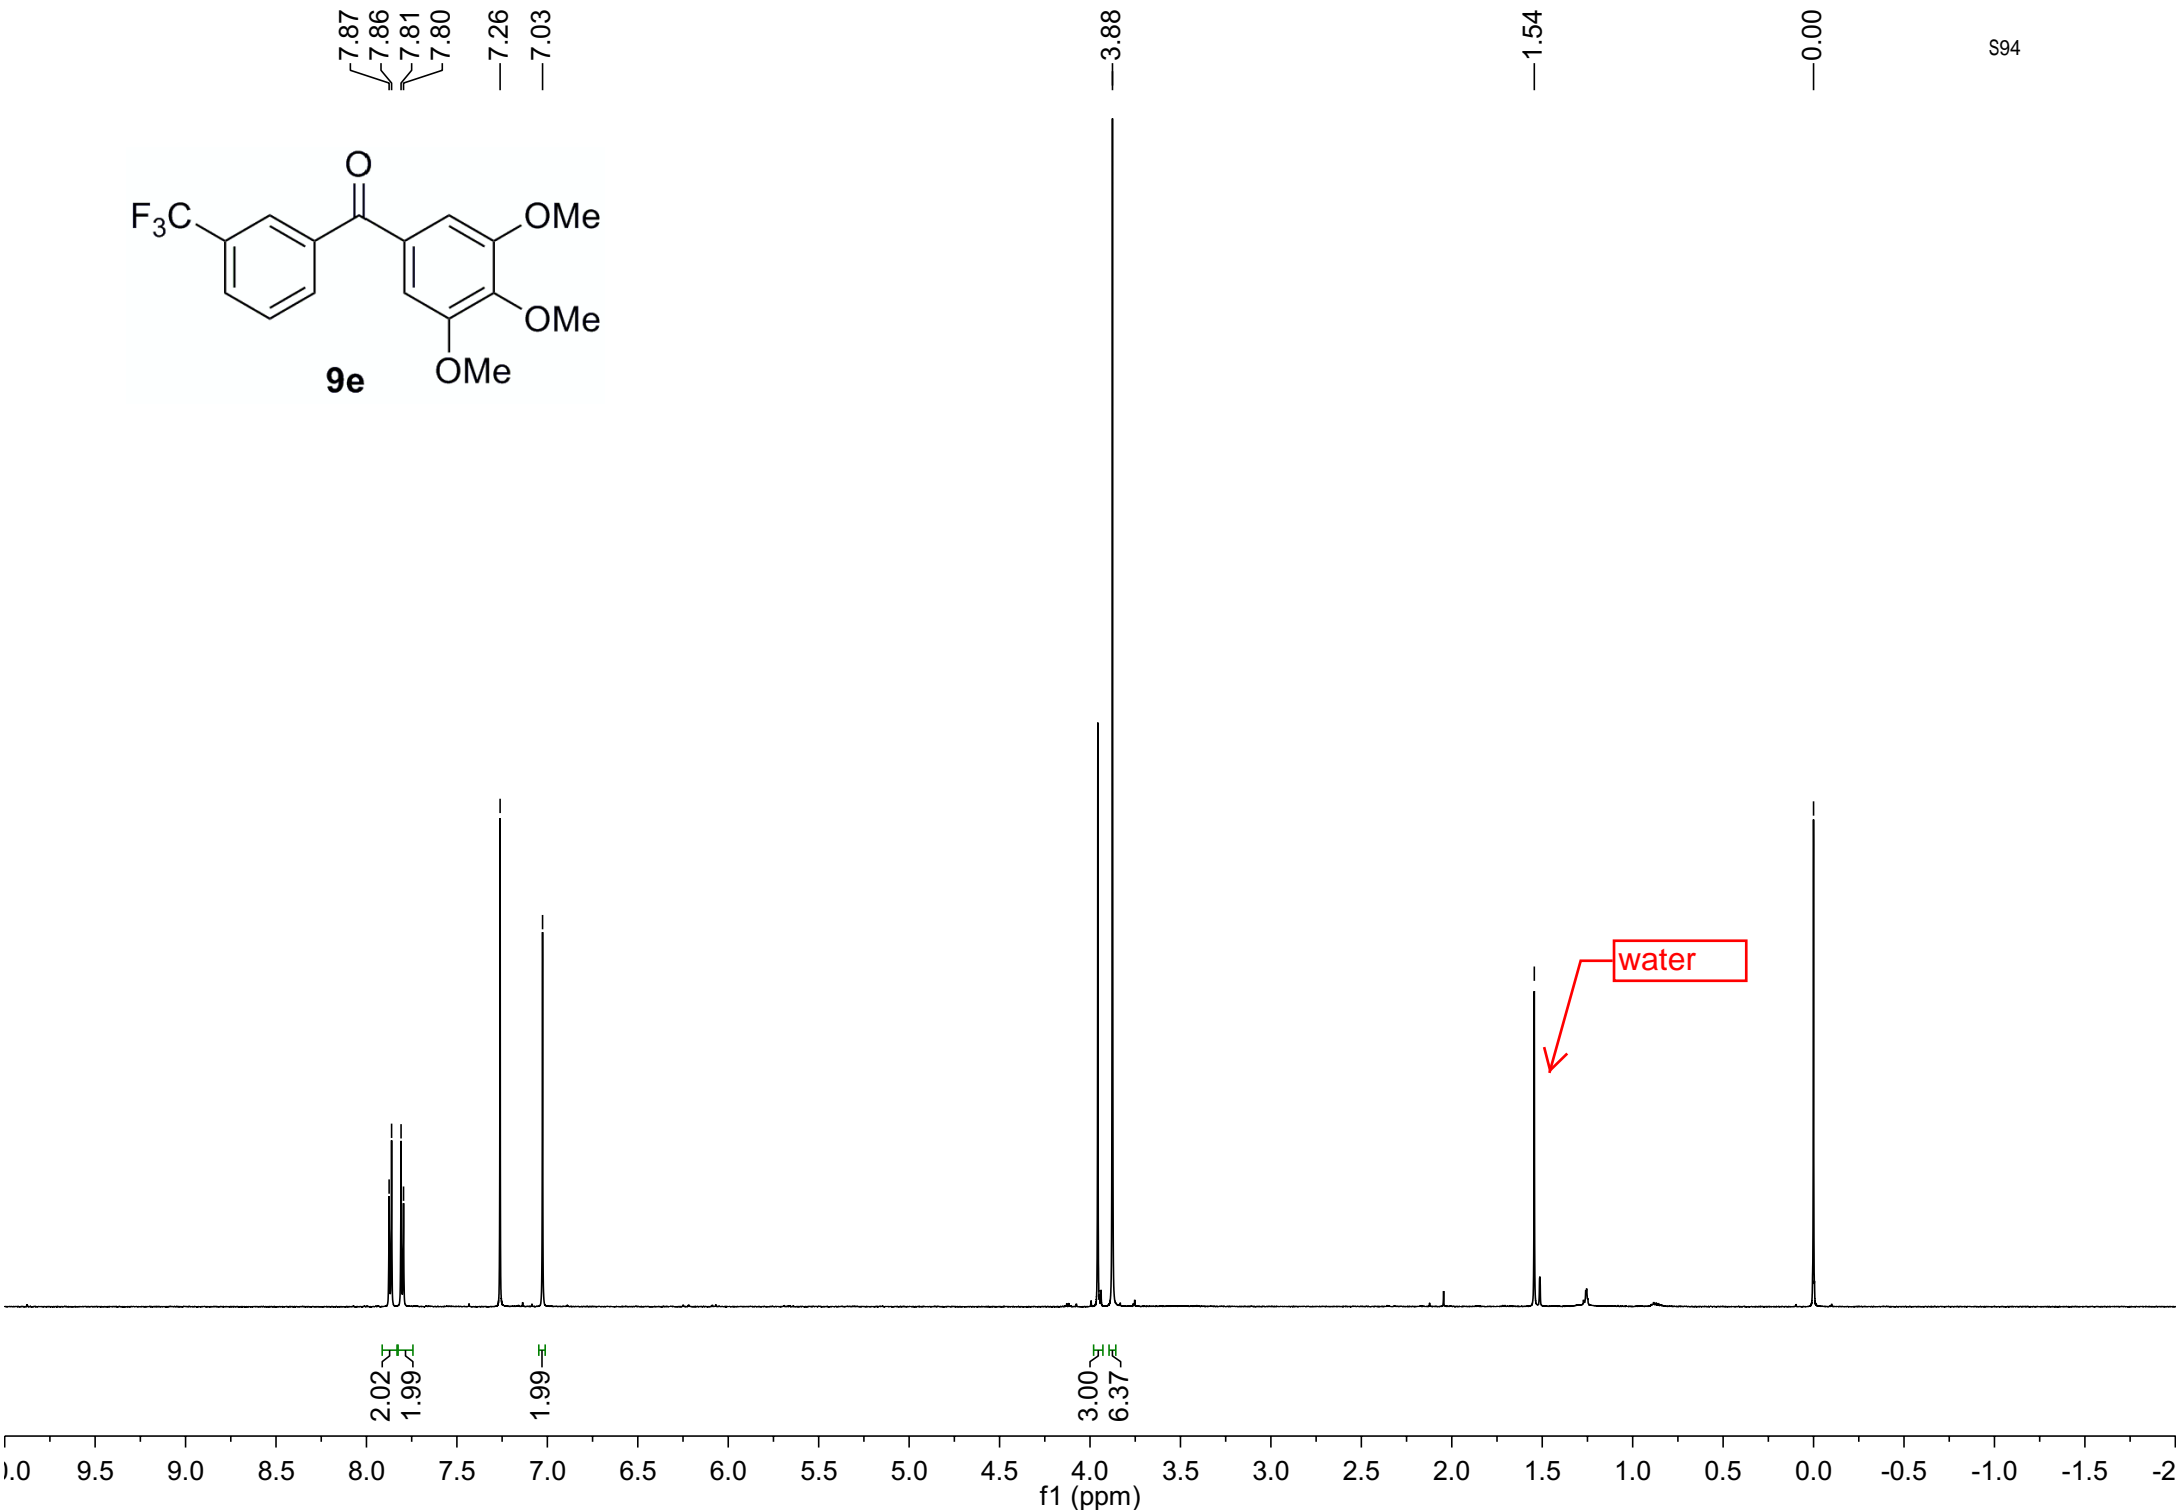

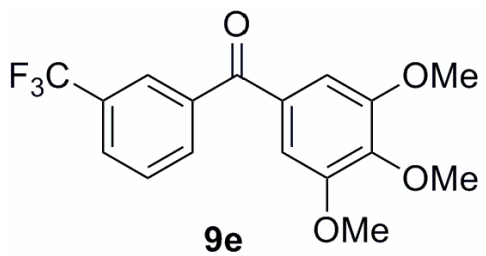

—63.184

S95

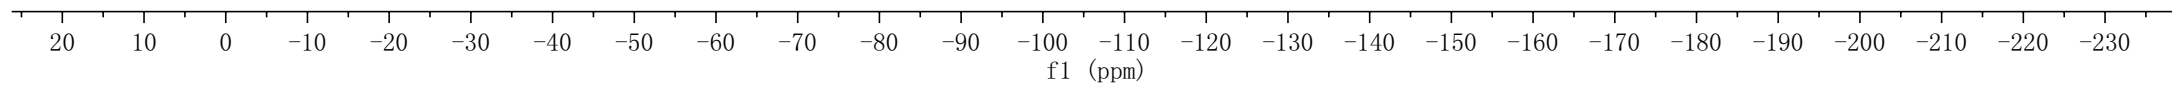

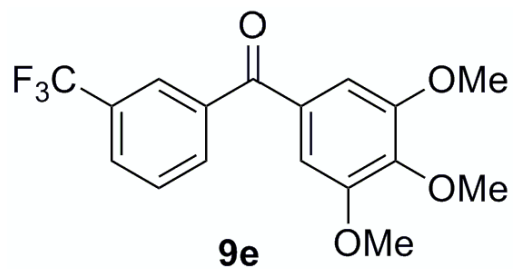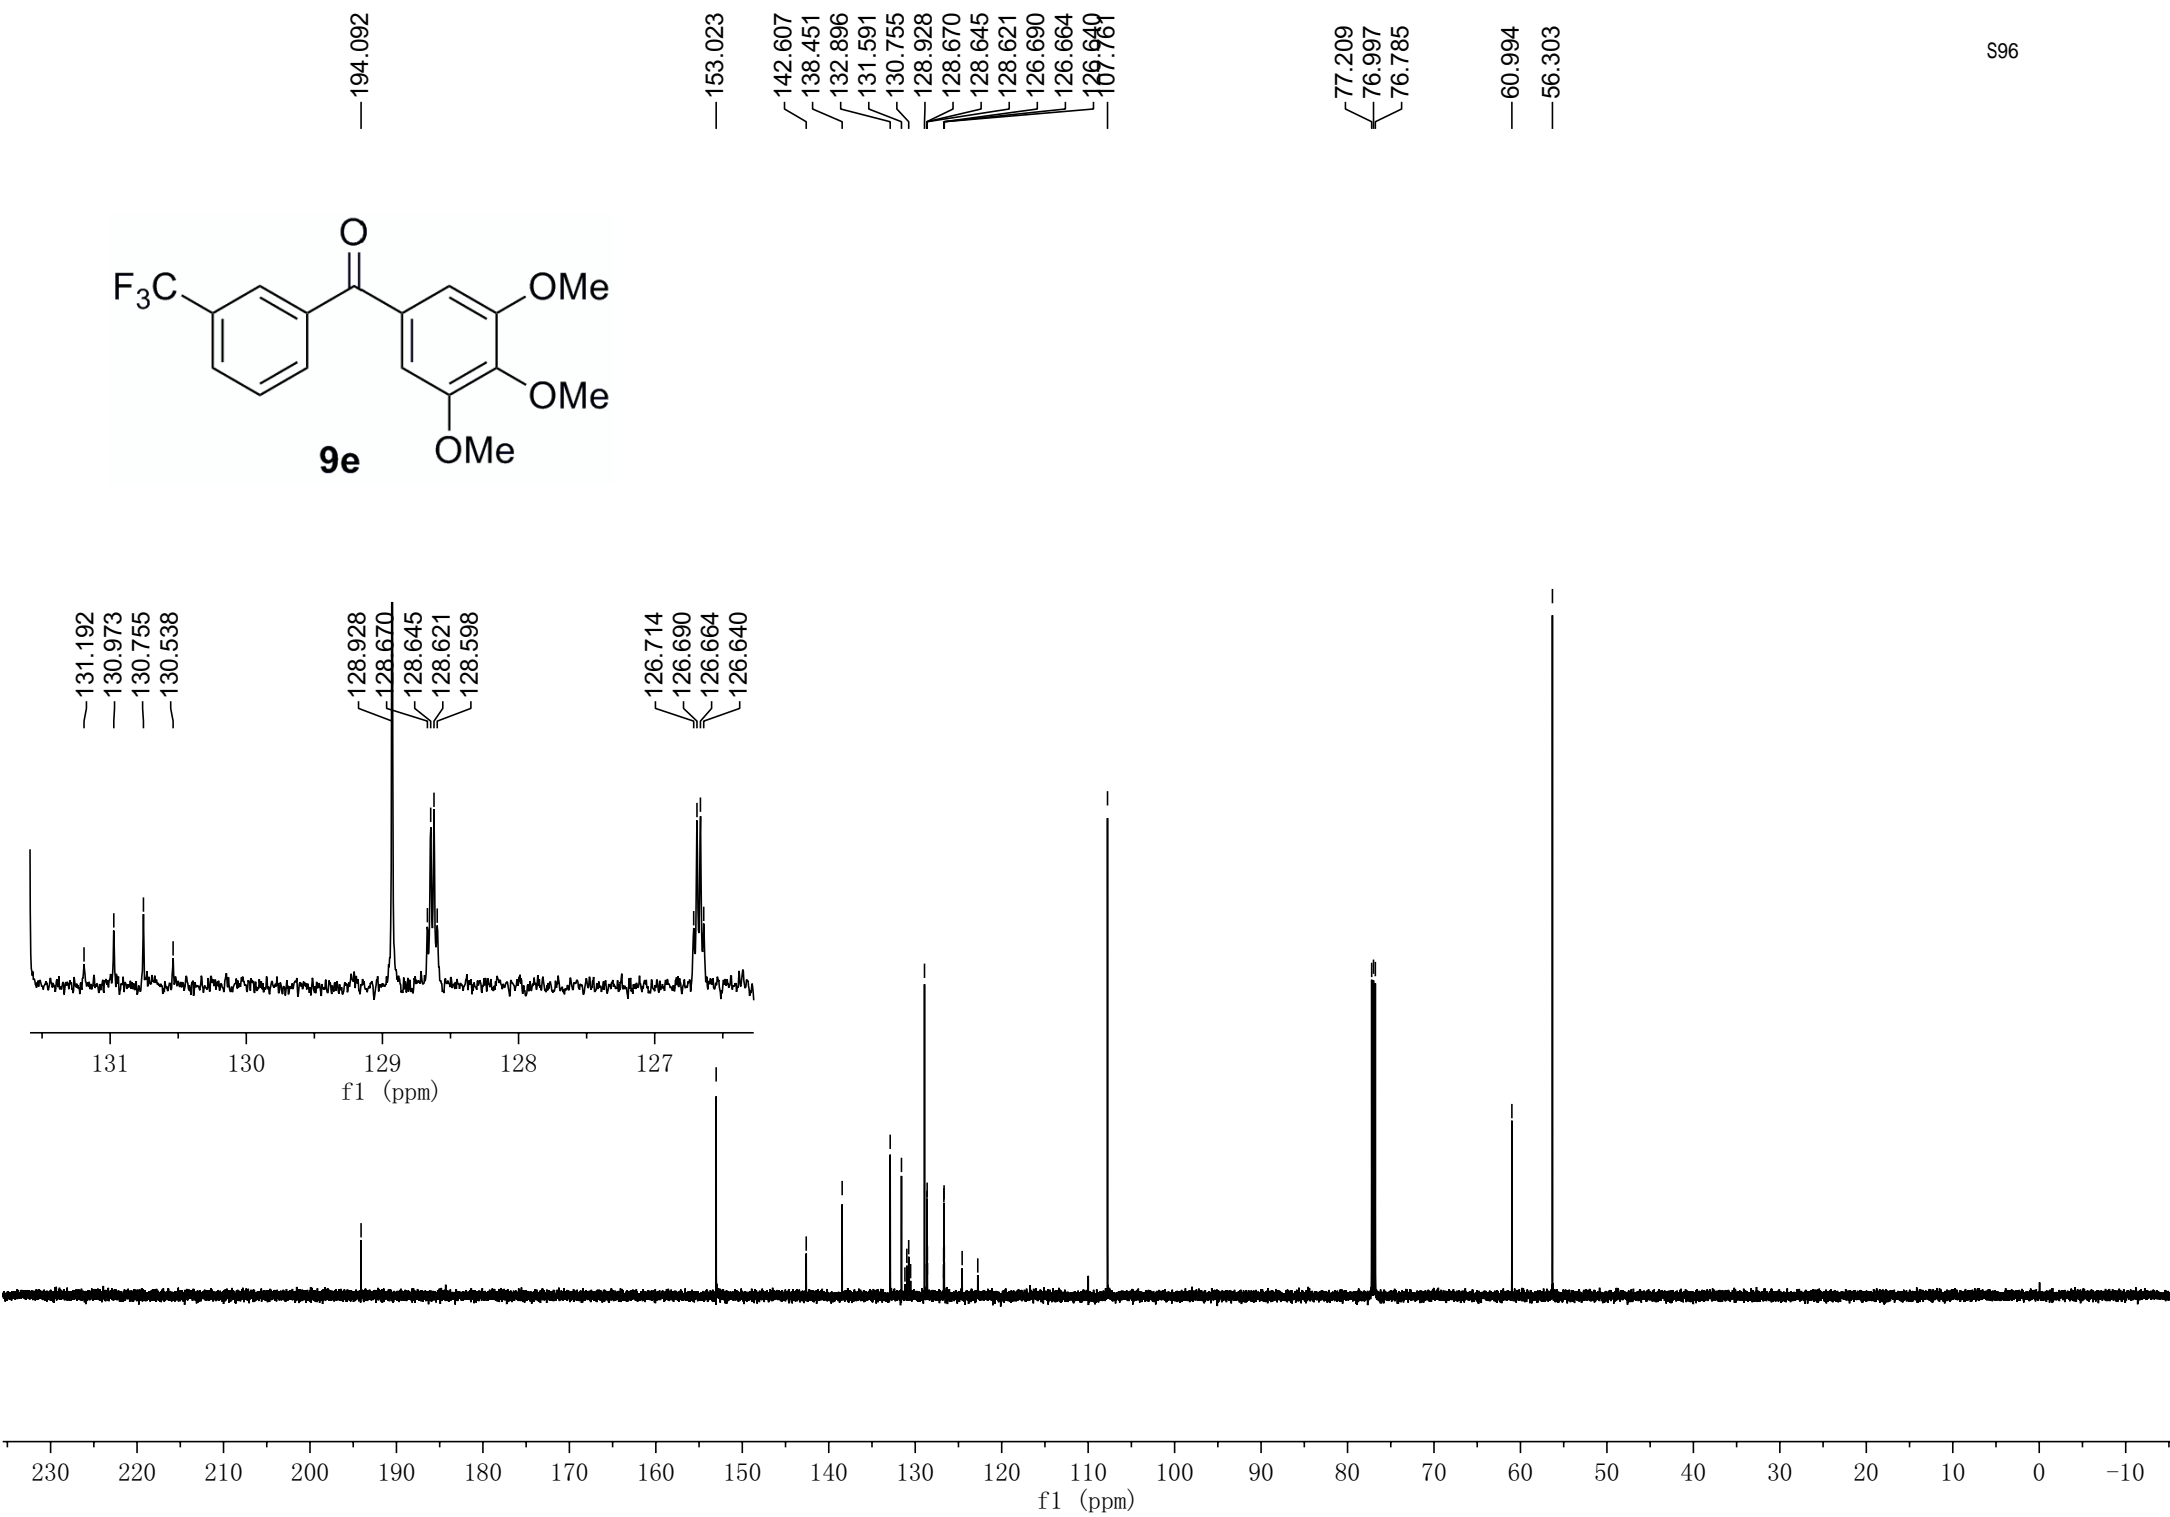

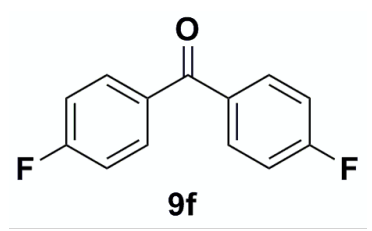

7.83  
7.83  
7.82  
7.81  
7.81  
7.81  
7.26  
7.19  
7.17  
7.16

1.55

-0.00

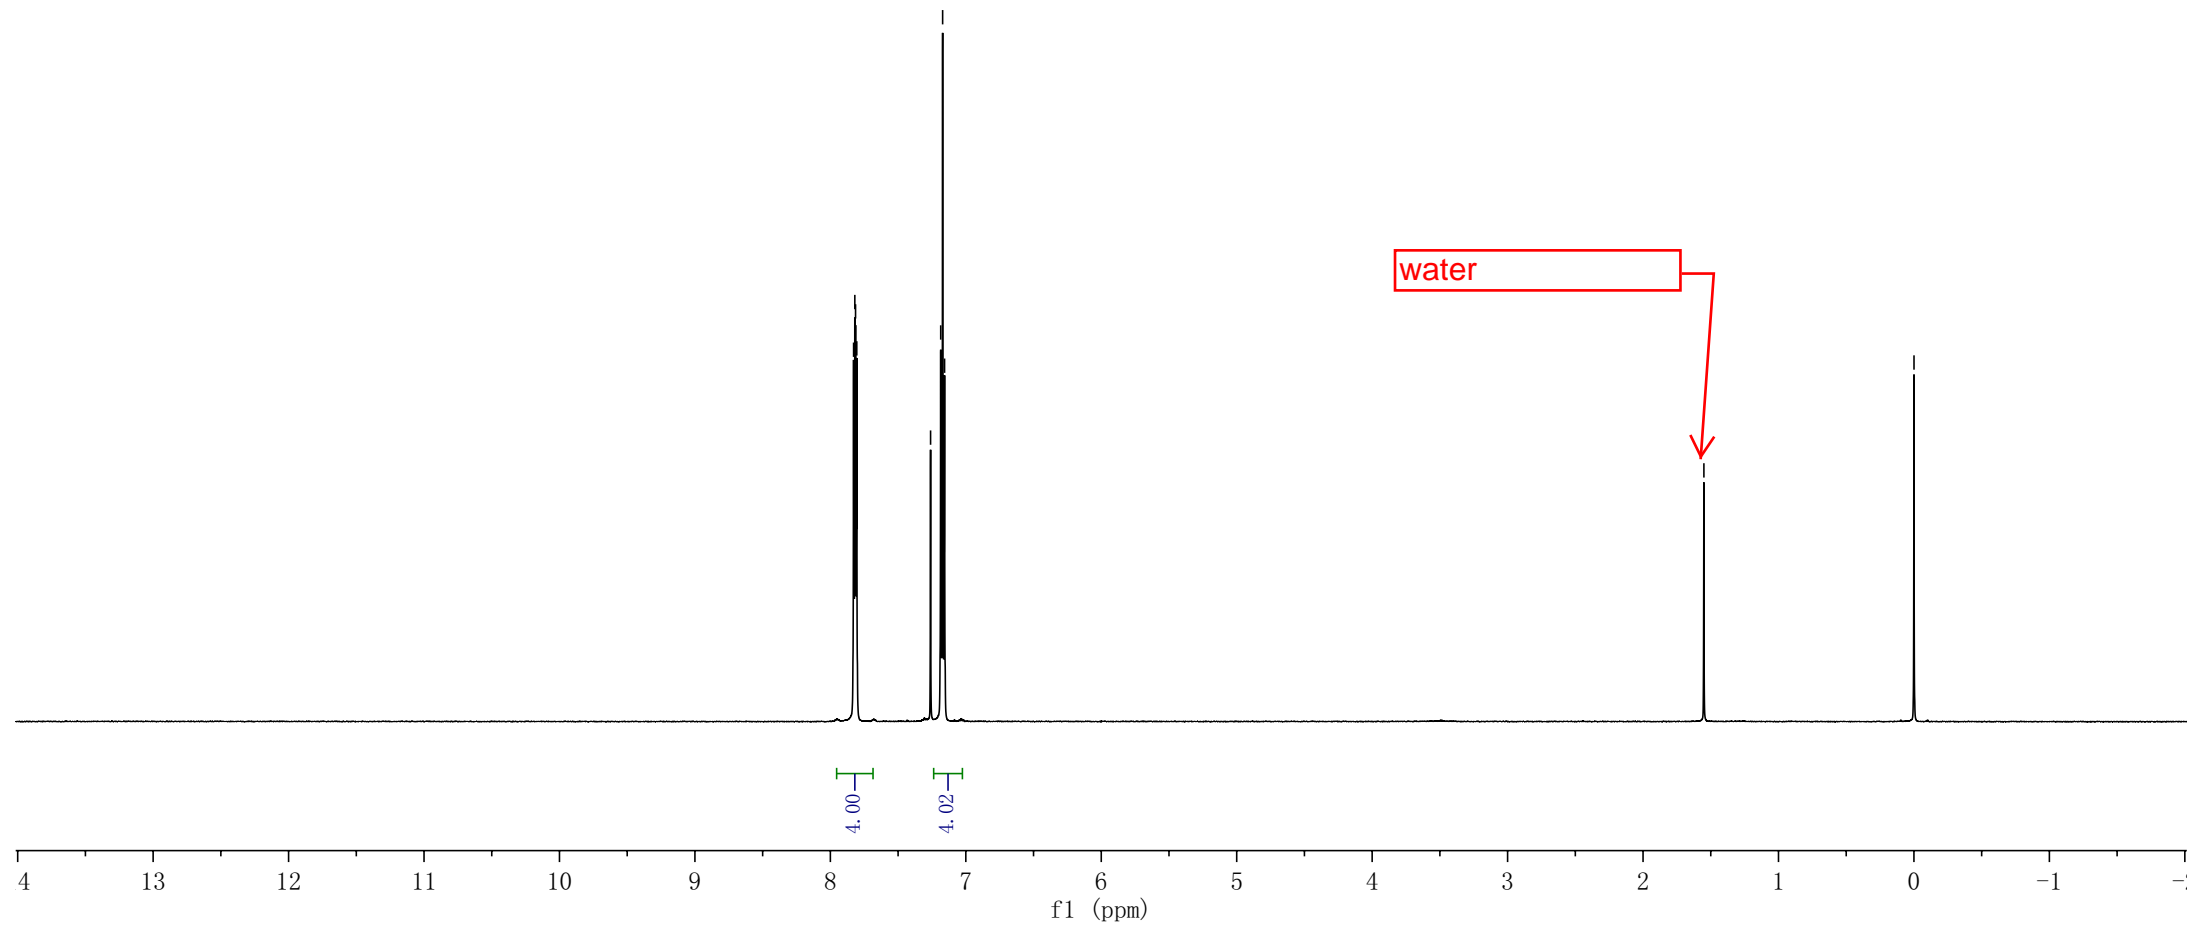

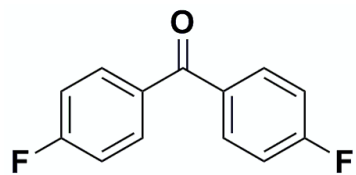

9f

---106.043

S98

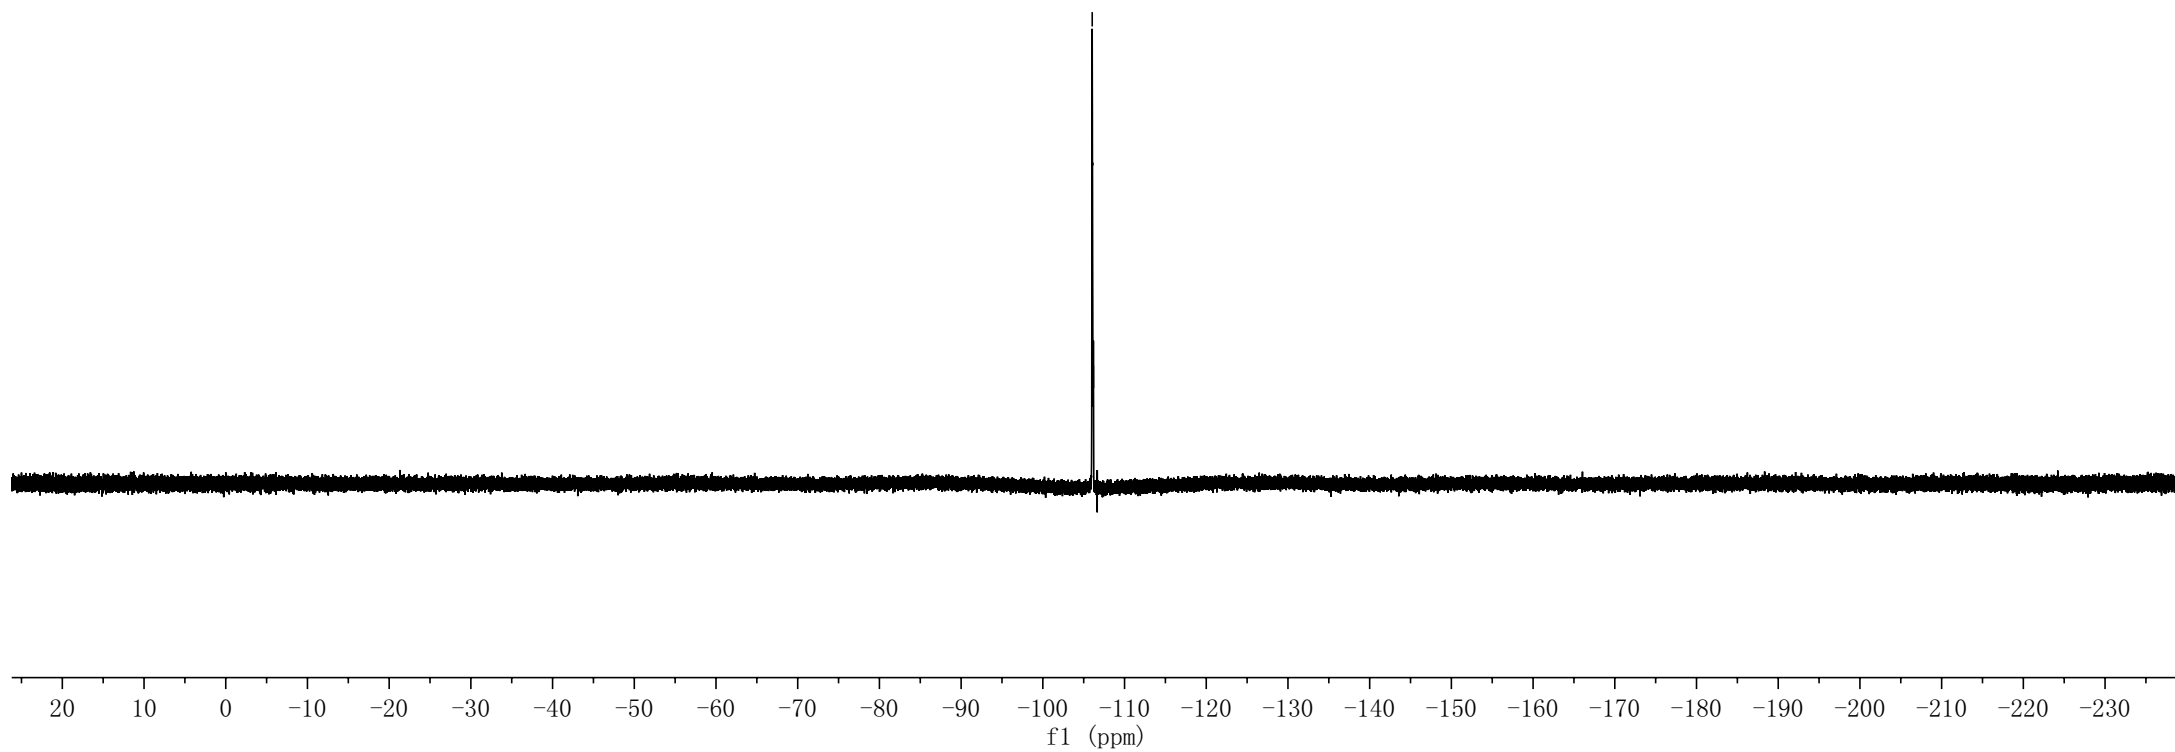

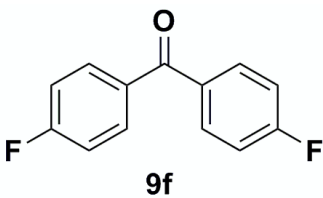

— 193.75

\ 166.21  
 / 164.53

\ 133.70  
 / 133.68  
 \ 132.49  
 / 132.43

\ 115.60  
 / 115.46

\ 77.20  
 / 76.98  
 \ 76.77

S99

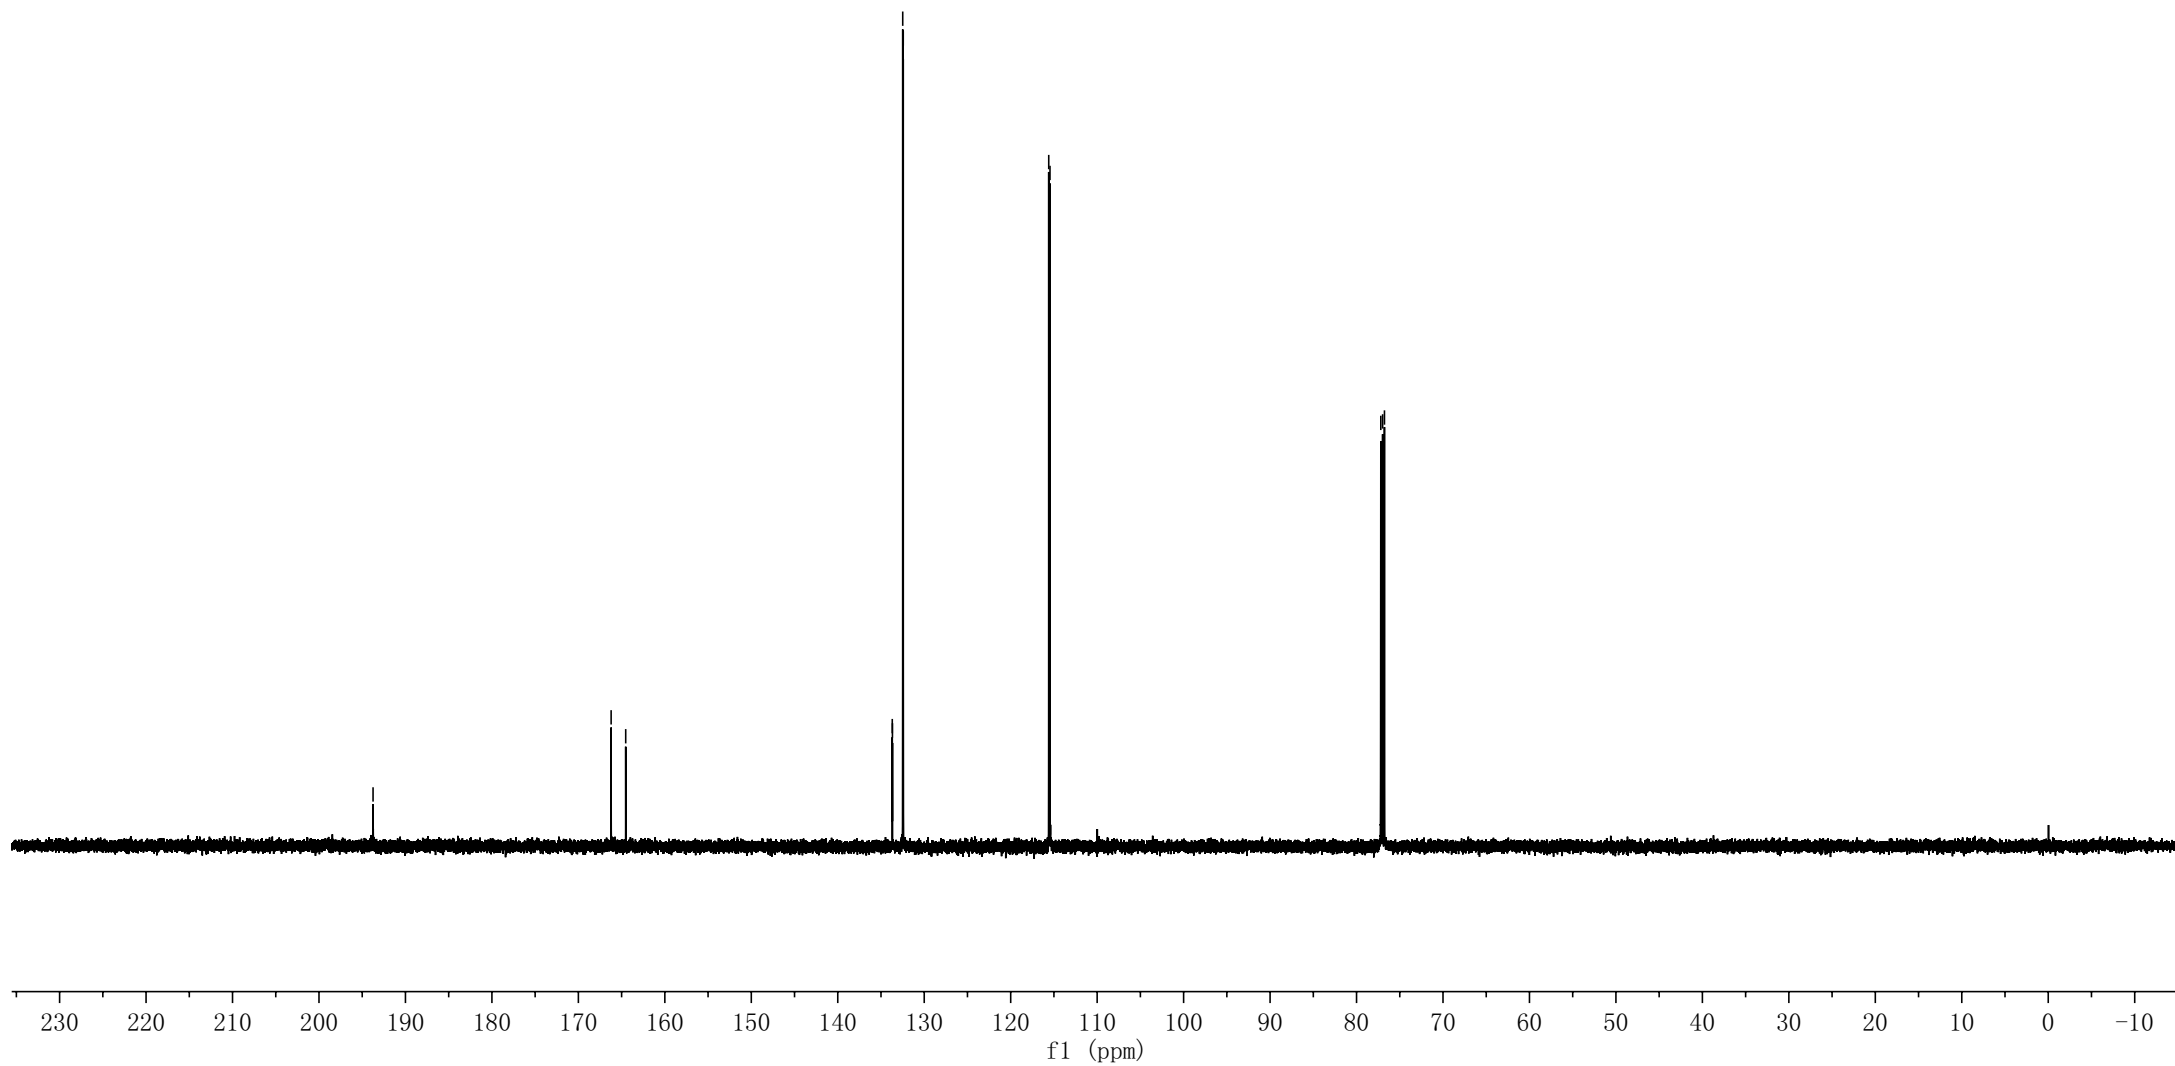

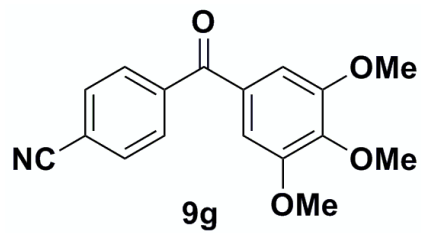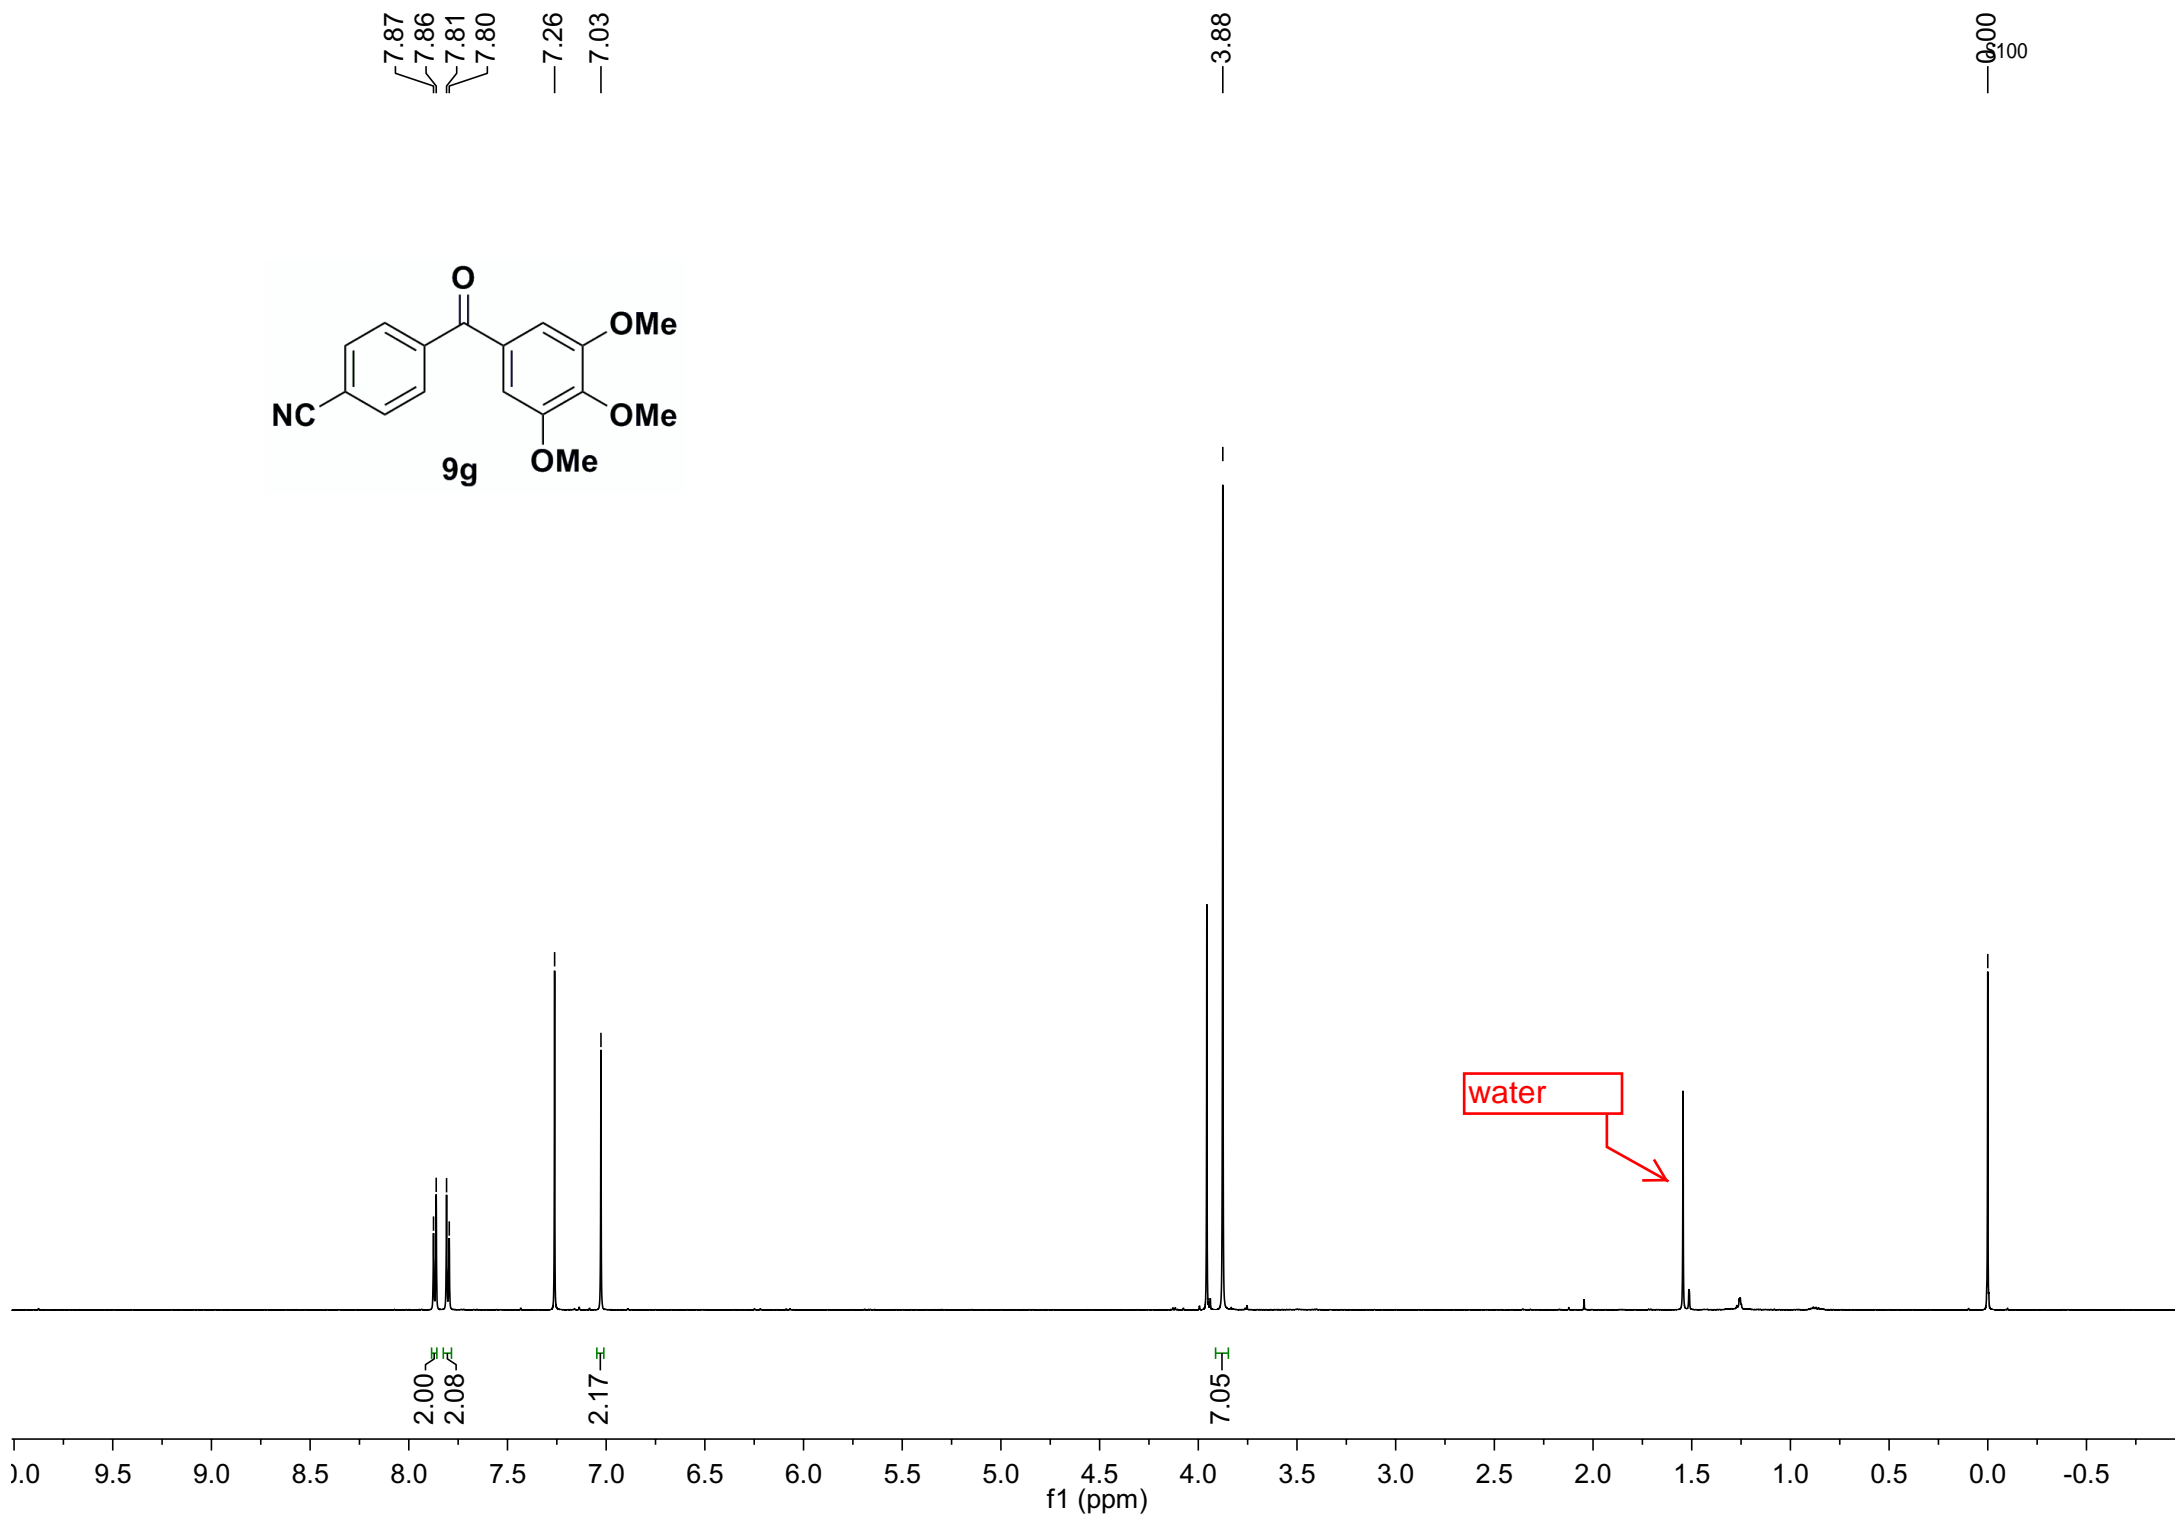

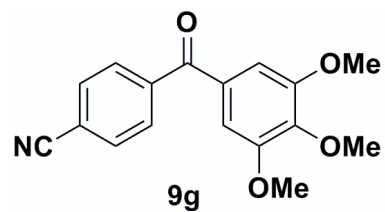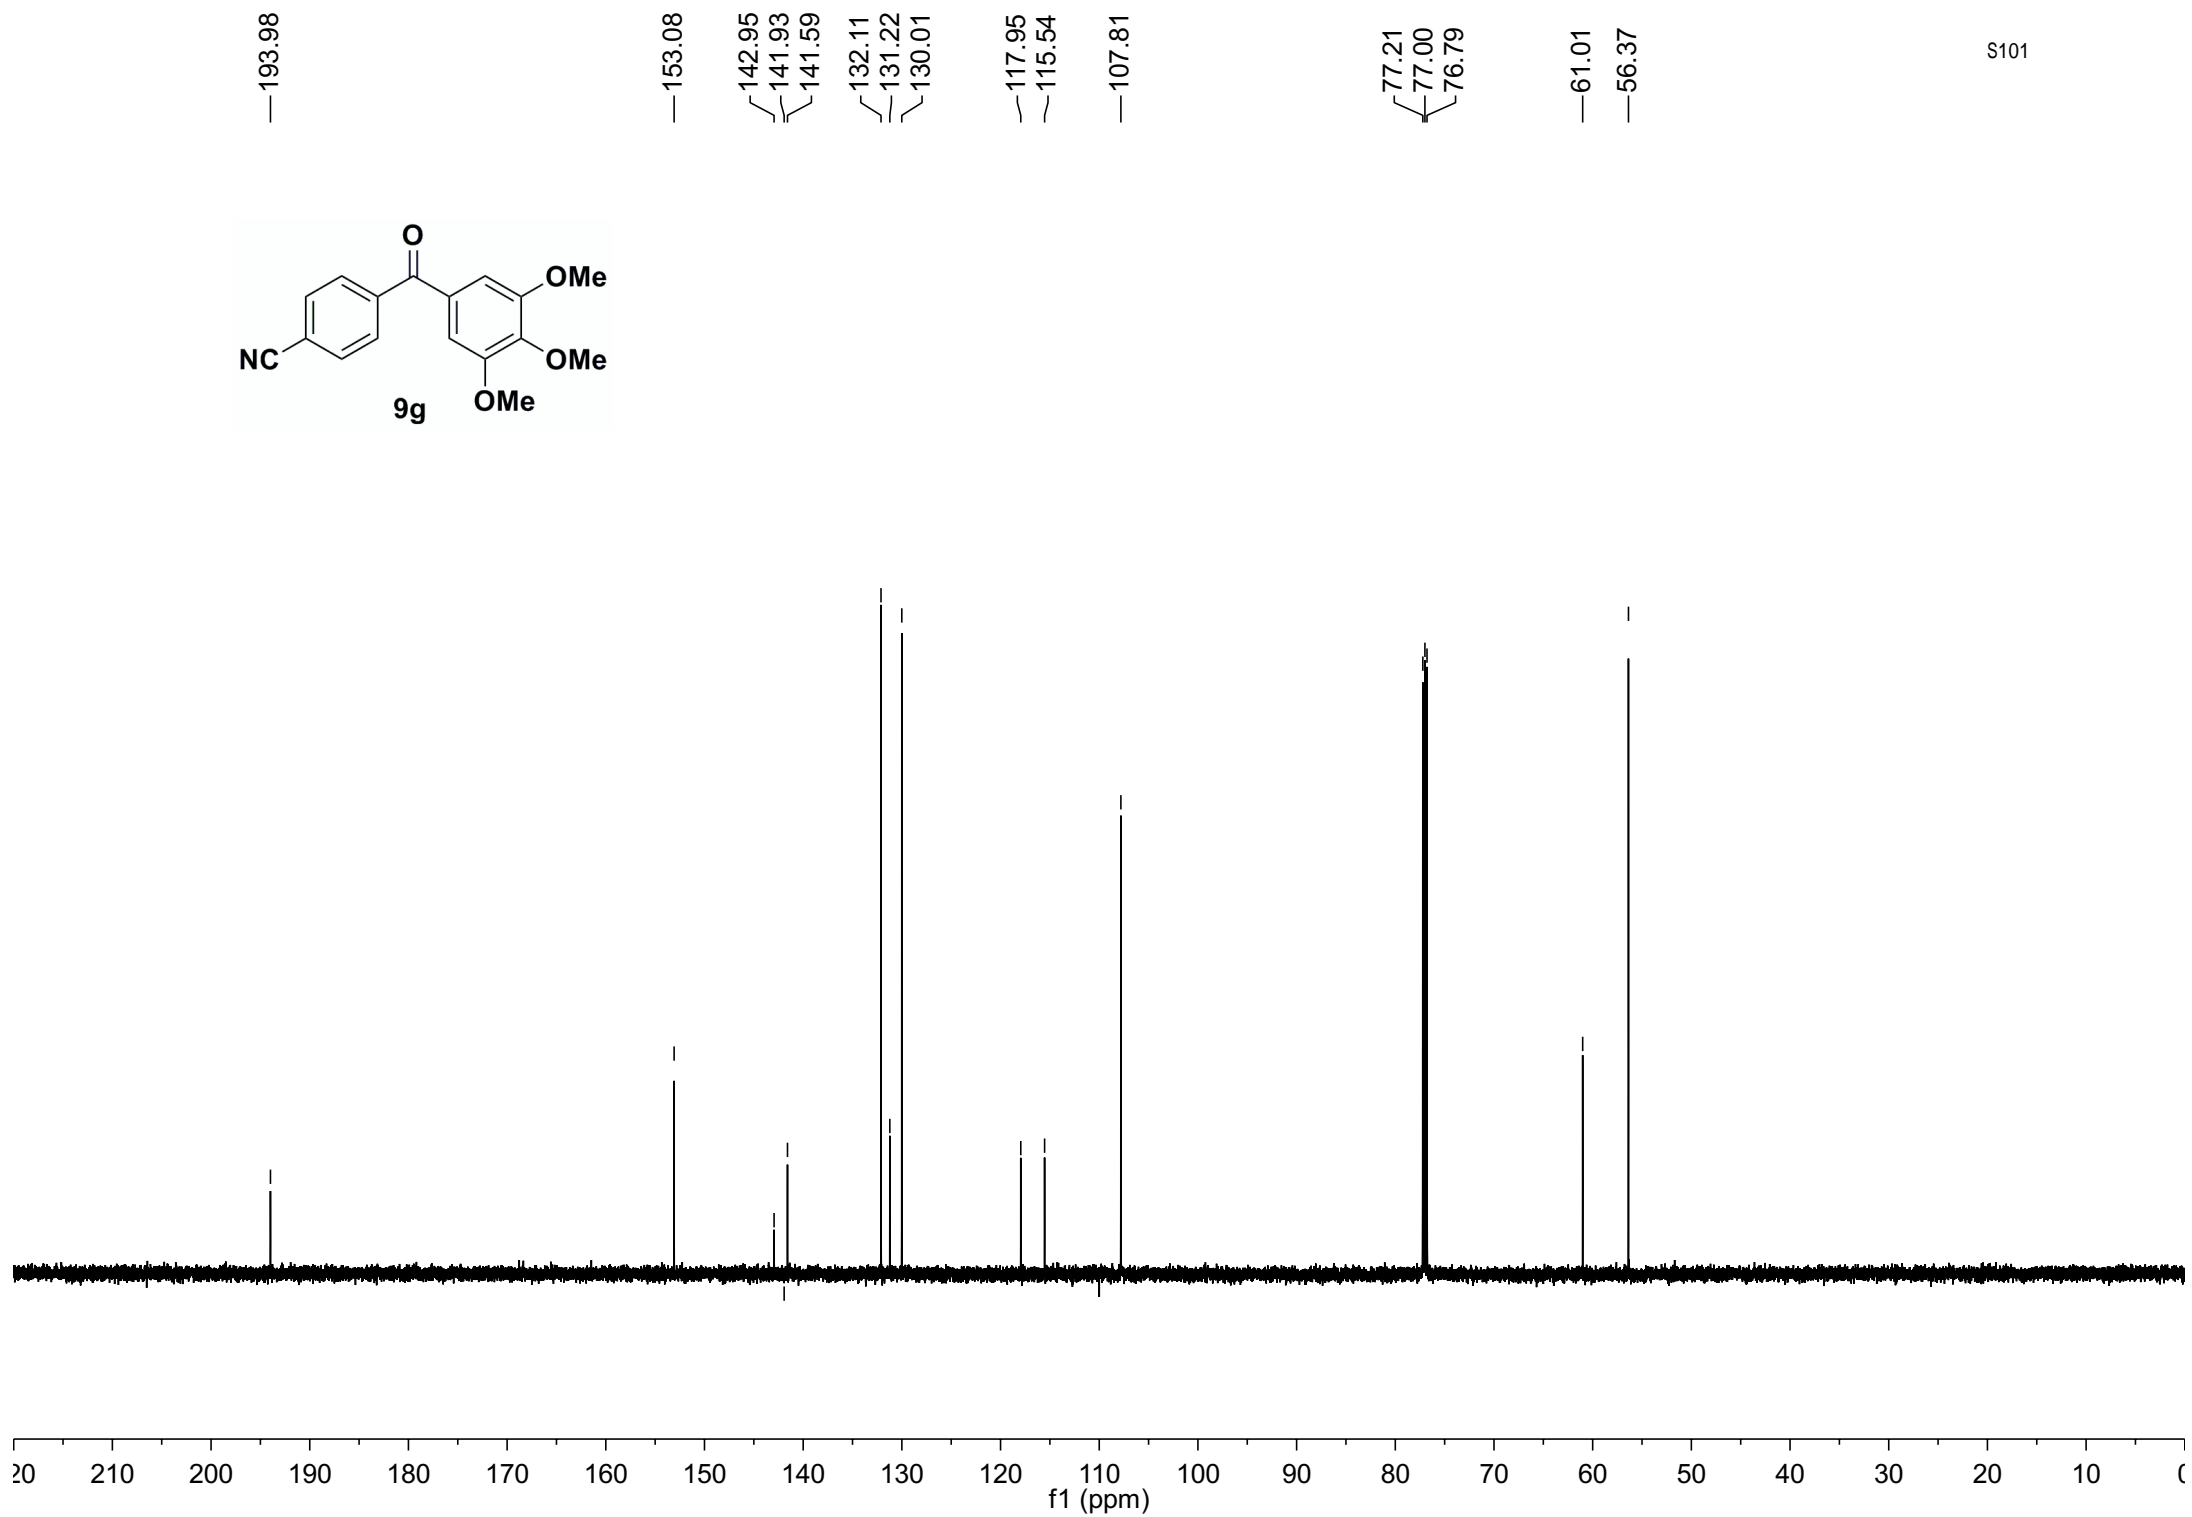

7.92  
7.91  
7.91  
7.90  
7.74  
7.73  
7.63  
7.63  
7.26  
7.20  
7.18  
7.18  
7.17

1.55

0.00  
0.102

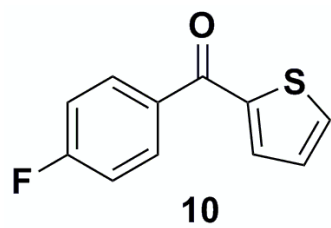

water

2.00  
0.93  
1.04  
2.98

f1 (ppm)

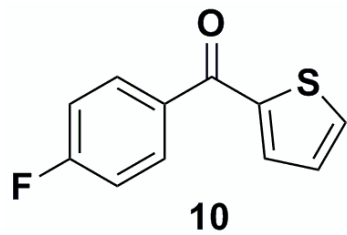

---106.648

S103

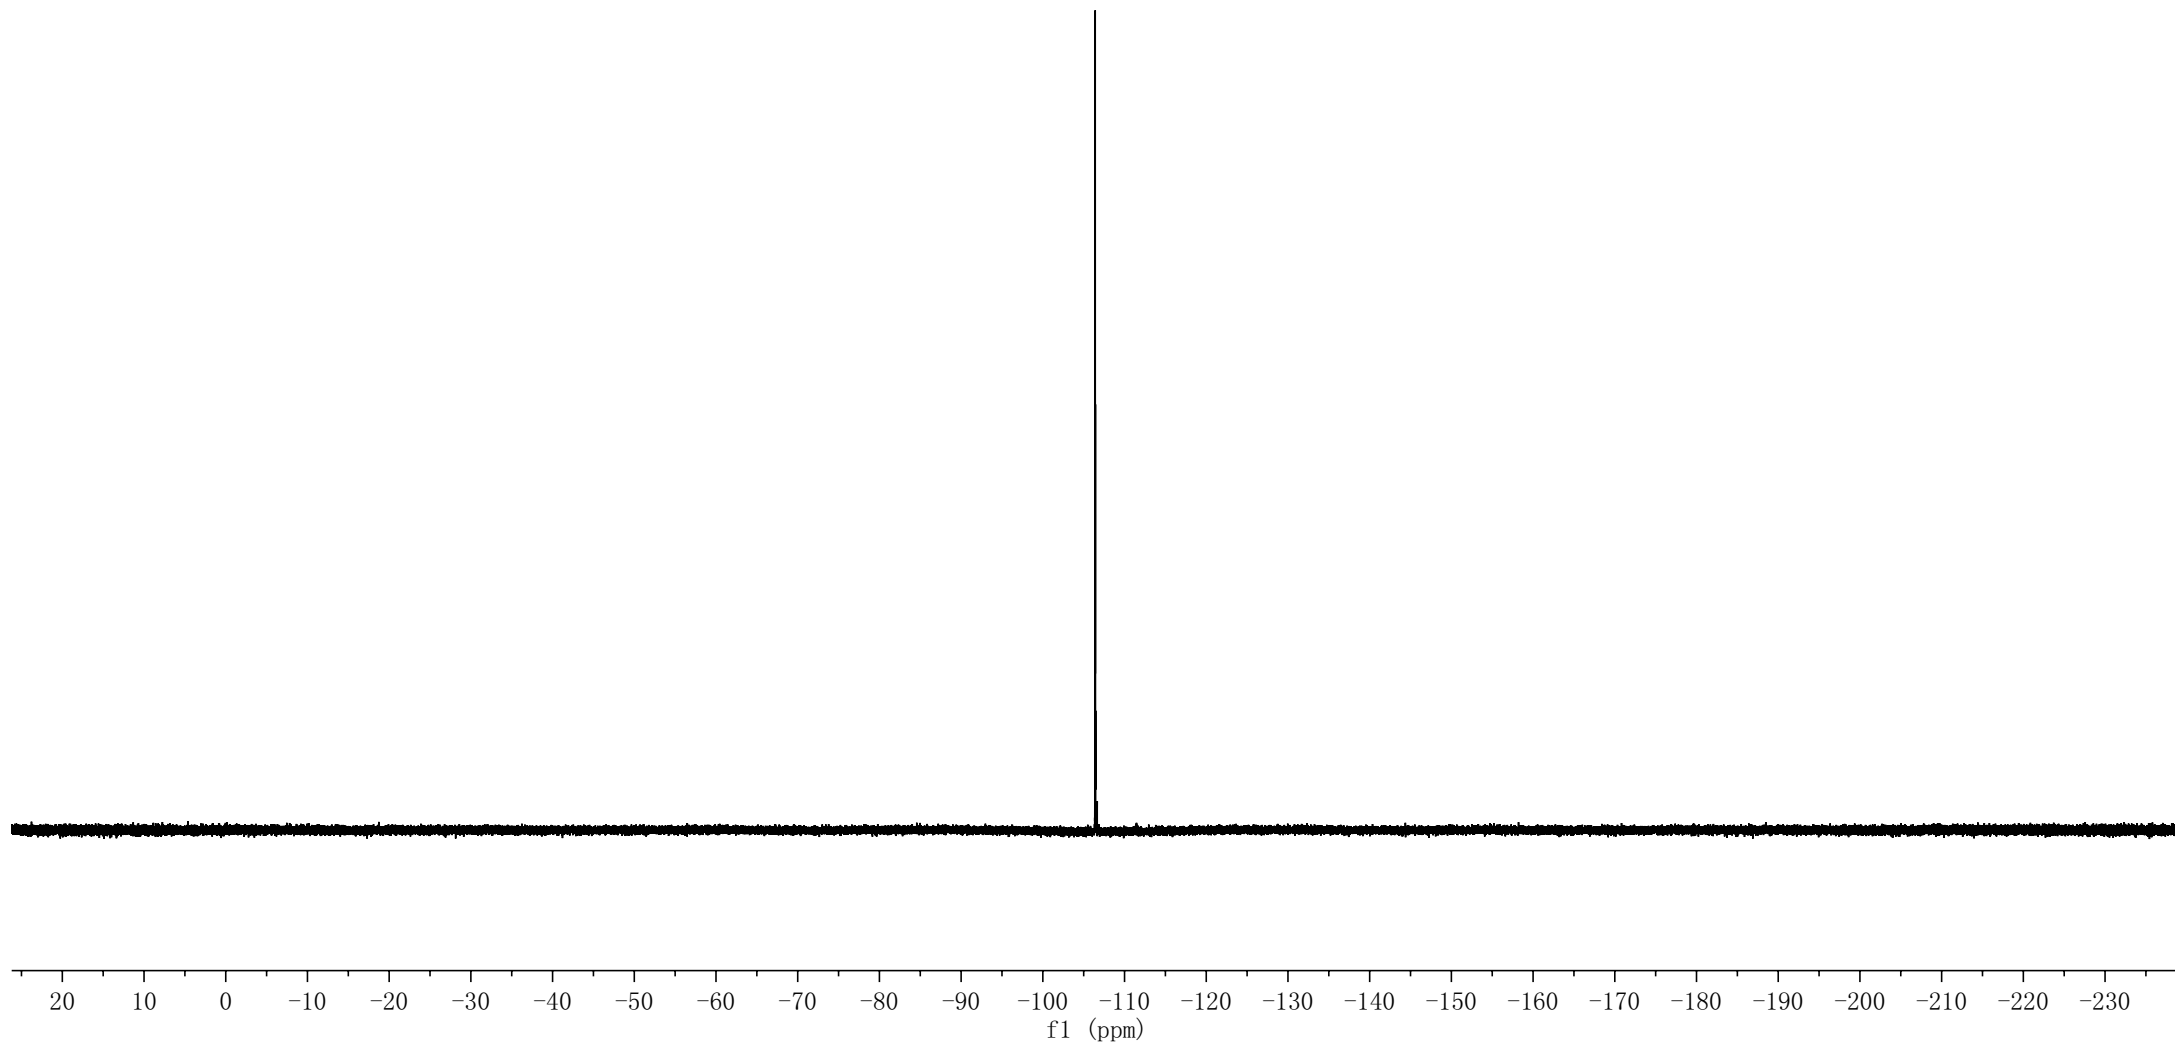

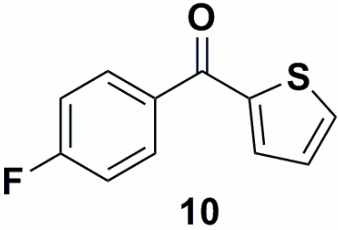

186.64

166.47  
163.94

143.27

134.25

131.71

131.62

127.95

115.64  
115.43

77.00

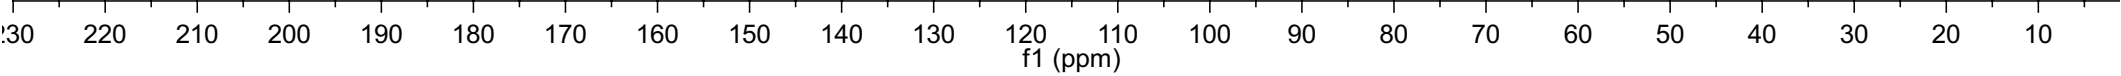

Supplement: c6ob01668e1.pdf [file c6ob01668e1.pdf]
